# Supplementary material for: Rab1b and ARF5 are novel RNA-binding proteins involved in FMDV IRES–driven RNA localization
Source: Life Sci Alliance. 2019 Jan 17;2(1):e201800131. doi: 10.26508/lsa.201800131 (PMC6337736; doi:10.26508/lsa.201800131)
Supplement: Supplementary file 1 [file LSA-2018-00131_Dataset_1.xlsx]

## Sheet: Raw Data
SL3a #1							SL3a #2							SL3abc #1							SL3abc #2							SL123#1							SL123#2							D3#1							D3#2
Accession	Description	Score	Coverage	# Proteins	# Peptides	MW [kDa]	Accession	Description	Score	Coverage	# Proteins	# Peptides	MW [kDa]	Accession	Description	Score	Coverage	# Proteins	# Peptides	MW [kDa]	Accession	Description	Score	Coverage	# Proteins	# Peptides	MW [kDa]	Accession	Description	Score	Coverage	# Proteins	# Peptides	MW [kDa]	Accession	Description	Score	Coverage	# Proteins	# Peptides	MW [kDa]	Accession	Description	Score	Coverage	# Proteins	# Peptides	MW [kDa]	Accession
F8VW92	Tubulin, beta class I OS=Homo sapiens GN=TUBB PE=3 SV=1 - [F8VW92_HUMAN]	250.872	48.74	3	19	48.4876	P68371	Tubulin beta-4B chain OS=Homo sapiens GN=TUBB4B PE=1 SV=1 - [TBB4B_HUMAN]	188.251	45.84	27	17	49.799	F8VW92	Tubulin, beta class I OS=Homo sapiens GN=TUBB PE=3 SV=1 - [F8VW92_HUMAN]	220.487	48.97	3	3	48.4876	F8VW92	Tubulin, beta class I OS=Homo sapiens GN=TUBB PE=3 SV=1 - [F8VW92_HUMAN]	178.321	48.97	3	19	48.4876	P07437	Tubulin beta chain OS=Homo sapiens GN=TUBB PE=1 SV=2 - [TBB5_HUMAN]	179.142	47.97	28	20	49.639	P07437	Tubulin beta chain OS=Homo sapiens GN=TUBB PE=1 SV=2 - [TBB5_HUMAN]	341.165	43.92	28	18	49.639	P07437	Tubulin beta chain OS=Homo sapiens GN=TUBB PE=1 SV=2 - [TBB5_HUMAN]	200.289	46.17	29	19	49.639	P07437
P68371	Tubulin beta-4B chain OS=Homo sapiens GN=TUBB4B PE=1 SV=1 - [TBB4B_HUMAN]	234.96	47.64	3	19	49.799	F8VW92	Tubulin, beta class I OS=Homo sapiens GN=TUBB PE=3 SV=1 - [F8VW92_HUMAN]	178.685	46.9	39	17	48.4876	P68371	Tubulin beta-4B chain OS=Homo sapiens GN=TUBB4B PE=1 SV=1 - [TBB4B_HUMAN]	213.675	47.87	3	2	49.799	P68371	Tubulin beta-4B chain OS=Homo sapiens GN=TUBB4B PE=1 SV=1 - [TBB4B_HUMAN]	177.657	47.87	3	19	49.799	B3KML9	cDNA FLJ11352 fis, clone HEMBA1000020, highly similar to Tubulin beta-2C chain OS=Homo sapiens PE=2 SV=1 - [B3KML9_HUMAN]	167.435	49.12	10	19	44.5735	P68371	Tubulin beta-4B chain OS=Homo sapiens GN=TUBB4B PE=1 SV=1 - [TBB4B_HUMAN]	334.236	43.82	26	18	49.799	Q9BVA1	Tubulin beta-2B chain OS=Homo sapiens GN=TUBB2B PE=1 SV=1 - [TBB2B_HUMAN]	187.122	46.97	16	20	49.9209	P68371
B3KPS3	cDNA FLJ32131 fis, clone PEBLM2000267, highly similar to Tubulin alpha-ubiquitous chain OS=Homo sapiens PE=2 SV=1 - [B3KPS3_HUMAN]	209.616	38.22	3	14	46.2118	A8MUB1	Tubulin, alpha 1 (Testis specific), isoform CRA_a OS=Homo sapiens GN=TUBA4A PE=2 SV=1 - [A8MUB1_HUMAN]	163.717	40.42	13	15	48.2976	B3KPS3	cDNA FLJ32131 fis, clone PEBLM2000267, highly similar to Tubulin alpha-ubiquitous chain OS=Homo sapiens PE=2 SV=1 - [B3KPS3_HUMAN]	200.12	38.46	3	3	46.2118	B3KPS3	cDNA FLJ32131 fis, clone PEBLM2000267, highly similar to Tubulin alpha-ubiquitous chain OS=Homo sapiens PE=2 SV=1 - [B3KPS3_HUMAN]	157.618	39.18	3	13	46.2118	Q13885	Tubulin beta-2A chain OS=Homo sapiens GN=TUBB2A PE=1 SV=1 - [TBB2A_HUMAN]	163.571	43.15	16	18	49.875	P04350	Tubulin beta-4A chain OS=Homo sapiens GN=TUBB4A PE=1 SV=2 - [TBB4A_HUMAN]	286.407	35.36	13	15	49.5539	B3KML9	cDNA FLJ11352 fis, clone HEMBA1000020, highly similar to Tubulin beta-2C chain OS=Homo sapiens PE=2 SV=1 - [B3KML9_HUMAN]	180.354	47.1	10	18	44.5735	H6VRF8
P04264	Keratin, type II cytoskeletal 1 OS=Homo sapiens GN=KRT1 PE=1 SV=6 - [K2C1_HUMAN]	196.066	37.42	1	26	65.999	Q9BVA1	Tubulin beta-2B chain OS=Homo sapiens GN=TUBB2B PE=1 SV=1 - [TBB2B_HUMAN]	158.082	38.65	21	14	49.9209	A8MUB1	Tubulin, alpha 1 (Testis specific), isoform CRA_a OS=Homo sapiens GN=TUBA4A PE=2 SV=1 - [A8MUB1_HUMAN]	192.539	36.95	2	3	48.2976	Q9BVA1	Tubulin beta-2B chain OS=Homo sapiens GN=TUBB2B PE=1 SV=1 - [TBB2B_HUMAN]	155.296	42.7	1	18	49.9209	Q13509	Tubulin beta-3 chain OS=Homo sapiens GN=TUBB3 PE=1 SV=2 - [TBB3_HUMAN]	146.337	39.56	14	17	50.4003	Q13885	Tubulin beta-2A chain OS=Homo sapiens GN=TUBB2A PE=1 SV=1 - [TBB2A_HUMAN]	265.756	41.8	17	17	49.875	Q8IWP6	Class IVb beta tubulin OS=Homo sapiens PE=2 SV=1 - [Q8IWP6_HUMAN]	179.924	46.07	19	19	49.721	B2R6L0
A8MUB1	Tubulin, alpha 1 (Testis specific), isoform CRA_a OS=Homo sapiens GN=TUBA4A PE=2 SV=1 - [A8MUB1_HUMAN]	179.321	36.72	2	14	48.2976	Q53GA7	Tubulin alpha 6 variant (Fragment) OS=Homo sapiens PE=2 SV=1 - [Q53GA7_HUMAN]	143.385	38.98	16	15	49.7914	Q13885	Tubulin beta-2A chain OS=Homo sapiens GN=TUBB2A PE=1 SV=1 - [TBB2A_HUMAN]	185.473	43.15	2	1	49.875	A8MUB1	Tubulin, alpha 1 (Testis specific), isoform CRA_a OS=Homo sapiens GN=TUBA4A PE=2 SV=1 - [A8MUB1_HUMAN]	151.003	37.64	2	13	48.2976	Q53GA7	Tubulin alpha 6 variant (Fragment) OS=Homo sapiens PE=2 SV=1 - [Q53GA7_HUMAN]	112.993	37.42	14	16	49.7914	H6VRF8	Keratin 1 OS=Homo sapiens GN=KRT1 PE=3 SV=1 - [H6VRF8_HUMAN]	256.066	37.11	6	30	66.013	Q13509	Tubulin beta-3 chain OS=Homo sapiens GN=TUBB3 PE=1 SV=2 - [TBB3_HUMAN]	146.985	37.78	15	16	50.4003	P04350
P13645	Keratin, type I cytoskeletal 10 OS=Homo sapiens GN=KRT10 PE=1 SV=6 - [K1C10_HUMAN]	160.529	35.45	1	22	58.7917	Q13509	Tubulin beta-3 chain OS=Homo sapiens GN=TUBB3 PE=1 SV=2 - [TBB3_HUMAN]	125.989	43.33	19	16	50.4003	P13645	Keratin, type I cytoskeletal 10 OS=Homo sapiens GN=KRT10 PE=1 SV=6 - [K1C10_HUMAN]	179.799	32.53	1	15	58.7917	Q13509	Tubulin beta-3 chain OS=Homo sapiens GN=TUBB3 PE=1 SV=2 - [TBB3_HUMAN]	107.195	34	1	14	50.4003	A8MUB1	Tubulin alpha-4A chain OS=Homo sapiens GN=TUBA4A PE=2 SV=1 - [A8MUB1_HUMAN]	102.485	38.8	11	16	48.2976	P35908	Keratin, type II cytoskeletal 2 epidermal OS=Homo sapiens GN=KRT2 PE=1 SV=2 - [K22E_HUMAN]	255.858	44.91	8	32	65.3932	Q53GA7	Tubulin alpha 6 variant (Fragment) OS=Homo sapiens PE=2 SV=1 - [Q53GA7_HUMAN]	122.604	41.2	15	18	49.7914	Q13509
P35908	Keratin, type II cytoskeletal 2 epidermal OS=Homo sapiens GN=KRT2 PE=1 SV=2 - [K22E_HUMAN]	136.203	47.26	1	30	65.3932	P04264	Keratin, type II cytoskeletal 1 OS=Homo sapiens GN=KRT1 PE=1 SV=6 - [K2C1_HUMAN]	118.797	34.63	3	22	65.999	B3KPW9	Tubulin, alpha 8 OS=Homo sapiens GN=TUBA8 PE=2 SV=1 - [B3KPW9_HUMAN]	169.733	26.37	4	2	42.9262	P04264	Keratin, type II cytoskeletal 1 OS=Homo sapiens GN=KRT1 PE=1 SV=6 - [K2C1_HUMAN]	97.6649	32.76	1	20	65.999	Q9BUF5	Tubulin beta-6 chain OS=Homo sapiens GN=TUBB6 PE=1 SV=1 - [TBB6_HUMAN]	100.84	37.22	14	15	49.825	Q13509	Tubulin beta-3 chain OS=Homo sapiens GN=TUBB3 PE=1 SV=2 - [TBB3_HUMAN]	240.863	35.78	14	15	50.4003	Q9BUF5	Tubulin beta-6 chain OS=Homo sapiens GN=TUBB6 PE=1 SV=1 - [TBB6_HUMAN]	116.626	34.98	16	14	49.825	P35908
P04792	Heat shock protein beta-1 OS=Homo sapiens GN=HSPB1 PE=1 SV=2 - [HSPB1_HUMAN]	115.388	52.2	1	13	22.7685	P13645	Keratin, type I cytoskeletal 10 OS=Homo sapiens GN=KRT10 PE=1 SV=6 - [K1C10_HUMAN]	117.801	24.32	16	14	58.7917	P04264	Keratin, type II cytoskeletal 1 OS=Homo sapiens GN=KRT1 PE=1 SV=6 - [K2C1_HUMAN]	168.125	36.8	1	20	65.999	P13645	Keratin, type I cytoskeletal 10 OS=Homo sapiens GN=KRT10 PE=1 SV=6 - [K1C10_HUMAN]	93.9805	31.68	1	18	58.7917	P11142	Heat shock cognate 71 kDa protein OS=Homo sapiens GN=HSPA8 PE=1 SV=1 - [HSP7C_HUMAN]	96.0694	35.29	27	21	70.8542	P13645	Keratin, type I cytoskeletal 10 OS=Homo sapiens GN=KRT10 PE=1 SV=6 - [K1C10_HUMAN]	201.188	32.71	5	23	58.7917	A8MUB1	Tubulin alpha-4A chain OS=Homo sapiens GN=TUBA4A PE=2 SV=1 - [A8MUB1_HUMAN]	113.19	42.73	12	18	48.2976	G3V1U9
B4DP54	Tubulin, beta 6 class V OS=Homo sapiens GN=TUBB6 PE=2 SV=1 - [B4DP54_HUMAN]	115.314	31.82	2	13	46.6715	G3V1U9	Tubulin, alpha 1a OS=Homo sapiens GN=TUBA1A PE=3 SV=1 - [G3V1U9_HUMAN]	110.544	42.07	20	15	46.2678	B2RBD5	cDNA, FLJ95457, highly similar to Homo sapiens tubulin, beta, 4 (TUBB4), mRNA OS=Homo sapiens PE=2 SV=1 - [B2RBD5_HUMAN]	138.769	38.22	2	1	50.3722	Q9BUF5	Tubulin beta-6 chain OS=Homo sapiens GN=TUBB6 PE=1 SV=1 - [TBB6_HUMAN]	90.9891	32.74	1	12	49.825	B4DMA2	cDNA FLJ54023, highly similar to Heat shock protein HSP 90-beta OS=Homo sapiens PE=2 SV=1 - [B4DMA2_HUMAN]	79.2192	31.92	13	23	79.1451	P08238	Heat shock protein HSP 90-beta OS=Homo sapiens GN=HSP90AB1 PE=1 SV=4 - [HS90B_HUMAN]	197.295	37.15	14	32	83.2121	H6VRF8	Keratin 1 OS=Homo sapiens GN=KRT1 PE=3 SV=1 - [H6VRF8_HUMAN]	109.4	33.7	6	24	66.013	P05787
P52272-2	Isoform 2 of Heterogeneous nuclear ribonucleoprotein M OS=Homo sapiens GN=HNRNPM - [HNRPM_HUMAN]	89.7626	37.34	2	20	73.5724	Q9BUF5	Tubulin beta-6 chain OS=Homo sapiens GN=TUBB6 PE=1 SV=1 - [TBB6_HUMAN]	106.275	35.43	8	13	49.825	Q9BUF5	Tubulin beta-6 chain OS=Homo sapiens GN=TUBB6 PE=1 SV=1 - [TBB6_HUMAN]	116.336	38.79	1	6	49.825	P08238	Heat shock protein HSP 90-beta OS=Homo sapiens GN=HSP90AB1 PE=1 SV=4 - [HS90B_HUMAN]	89.8326	35.08	1	29	83.2121	P07900	Heat shock protein HSP 90-alpha OS=Homo sapiens GN=HSP90AA1 PE=1 SV=5 - [HS90A_HUMAN]	78.7863	32.92	11	24	84.6067	Q53GA7	Tubulin alpha 6 variant (Fragment) OS=Homo sapiens PE=2 SV=1 - [Q53GA7_HUMAN]	181.458	41.2	14	17	49.7914	B4DMA2	cDNA FLJ54023, highly similar to Heat shock protein HSP 90-beta OS=Homo sapiens PE=2 SV=1 - [B4DMA2_HUMAN]	87.9672	32.22	13	23	79.1451	B4DMA2
E9PDK5	Annexin A11 OS=Homo sapiens GN=ANXA11 PE=3 SV=1 - [E9PDK5_HUMAN]	87.959	45.39	3	18	45.6993	B3GQS7	Mitochondrial heat shock 60kD protein 1 variant 1 OS=Homo sapiens GN=HSPD1 PE=2 SV=1 - [B3GQS7_HUMAN]	95.6961	35.15	17	18	60.6423	P35908	Keratin, type II cytoskeletal 2 epidermal OS=Homo sapiens GN=KRT2 PE=1 SV=2 - [K22E_HUMAN]	110.872	41	1	21	65.3932	P11142	Heat shock cognate 71 kDa protein OS=Homo sapiens GN=HSPA8 PE=1 SV=1 - [HSP7C_HUMAN]	82.0471	33.28	1	18	70.8542	H6VRF8	Keratin 1 OS=Homo sapiens GN=KRT1 PE=3 SV=1 - [H6VRF8_HUMAN]	74.5326	33.07	6	21	66.013	P13647	Keratin, type II cytoskeletal 5 OS=Homo sapiens GN=KRT5 PE=1 SV=3 - [K2C5_HUMAN]	177.535	45.42	9	30	62.34	P35908	Keratin, type II cytoskeletal 2 epidermal OS=Homo sapiens GN=KRT2 PE=1 SV=2 - [K22E_HUMAN]	78.675	35.99	7	23	65.3932	A8MUB1
P13647	Keratin, type II cytoskeletal 5 OS=Homo sapiens GN=KRT5 PE=1 SV=3 - [K2C5_HUMAN]	71.4771	31.69	1	19	62.34	P35908	Keratin, type II cytoskeletal 2 epidermal OS=Homo sapiens GN=KRT2 PE=1 SV=2 - [K22E_HUMAN]	94.0506	43.04	10	24	65.3932	B4DMA2	cDNA FLJ54023, highly similar to Heat shock protein HSP 90-beta OS=Homo sapiens PE=2 SV=1 - [B4DMA2_HUMAN]	85.5584	32.94	2	13	79.1451	P07900	Heat shock protein HSP 90-alpha OS=Homo sapiens GN=HSP90AA1 PE=1 SV=5 - [HS90A_HUMAN]	74.548	34.43	2	24	84.6067	B3GQS7	Mitochondrial heat shock 60kD protein 1 variant 1 OS=Homo sapiens GN=HSPD1 PE=2 SV=1 - [B3GQS7_HUMAN]	74.0231	38.49	13	21	60.6423	A8MUB1	Tubulin alpha-4A chain OS=Homo sapiens GN=TUBA4A PE=2 SV=1 - [A8MUB1_HUMAN]	174.239	42.26	11	16	48.2976	P11142	Heat shock cognate 71 kDa protein OS=Homo sapiens GN=HSPA8 PE=1 SV=1 - [HSP7C_HUMAN]	76.0642	38.54	27	23	70.8542	P35527
P04259	Keratin, type II cytoskeletal 6B OS=Homo sapiens GN=KRT6B PE=1 SV=5 - [K2C6B_HUMAN]	70.7357	34.22	1	19	60.0303	P08238	Heat shock protein HSP 90-beta OS=Homo sapiens GN=HSP90AB1 PE=1 SV=4 - [HS90B_HUMAN]	90.2877	33.7	22	25	83.2121	P52272-2	Isoform 2 of Heterogeneous nuclear ribonucleoprotein M OS=Homo sapiens GN=HNRNPM - [HNRPM_HUMAN]	81.5822	36.61	2	24	73.5724	B3GQS7	Mitochondrial heat shock 60kD protein 1 variant 1 OS=Homo sapiens GN=HSPD1 PE=2 SV=1 - [B3GQS7_HUMAN]	70.9985	33.39	2	17	60.6423	Q01813	6-phosphofructokinase type C OS=Homo sapiens GN=PFKP PE=1 SV=2 - [K6PP_HUMAN]	68.5609	28.06	10	21	85.5415	P07900	Heat shock protein HSP 90-alpha OS=Homo sapiens GN=HSP90AA1 PE=1 SV=5 - [HS90A_HUMAN]	172.803	33.61	12	26	84.6067	P07900	Heat shock protein HSP 90-alpha OS=Homo sapiens GN=HSP90AA1 PE=1 SV=5 - [HS90A_HUMAN]	66.5844	28.96	11	20	84.6067	P13647
P35527	Keratin, type I cytoskeletal 9 OS=Homo sapiens GN=KRT9 PE=1 SV=3 - [K1C9_HUMAN]	68.2372	24.56	1	15	62.0268	P11142	Heat shock cognate 71 kDa protein OS=Homo sapiens GN=HSPA8 PE=1 SV=1 - [HSP7C_HUMAN]	78.7185	35.45	31	19	70.8542	Q4W4Y1	Dopamine receptor interacting protein 4 OS=Homo sapiens GN=DRIP4 PE=2 SV=1 - [Q4W4Y1_HUMAN]	76.1334	25.92	4	21	96.0192	P35908	Keratin, type II cytoskeletal 2 epidermal OS=Homo sapiens GN=KRT2 PE=1 SV=2 - [K22E_HUMAN]	69.3554	36.15	1	19	65.3932	P62701	40S ribosomal protein S4, X isoform OS=Homo sapiens GN=RPS4X PE=1 SV=2 - [RS4X_HUMAN]	57.705	47.15	12	14	29.5791	B4E1T1	cDNA FLJ54081, highly similar to Keratin, type II cytoskeletal 5 OS=Homo sapiens PE=2 SV=1 - [B4E1T1_HUMAN]	166.756	43.6	7	28	58.8143	B4E335	cDNA FLJ52842, highly similar to Actin, cytoplasmic 1 OS=Homo sapiens PE=2 SV=1 - [B4E335_HUMAN]	66.1407	38.75	55	13	39.2005	P07900
Q4W4Y1	Dopamine receptor interacting protein 4 OS=Homo sapiens GN=DRIP4 PE=2 SV=1 - [Q4W4Y1_HUMAN]	64.2304	24.42	2	21	96.0192	P07900	Heat shock protein HSP 90-alpha OS=Homo sapiens GN=HSP90AA1 PE=1 SV=5 - [HS90A_HUMAN]	71.4903	28.83	19	20	84.6067	P04792	Heat shock protein beta-1 OS=Homo sapiens GN=HSPB1 PE=1 SV=2 - [HSPB1_HUMAN]	68.7734	48.78	1	13	22.7685	P11940-2	Isoform 2 of Polyadenylate-binding protein 1 OS=Homo sapiens GN=PABPC1 - [PABP1_HUMAN]	65.1096	33.46	2	17	61.142	P04792	Heat shock protein beta-1 OS=Homo sapiens GN=HSPB1 PE=1 SV=2 - [HSPB1_HUMAN]	57.0637	49.76	4	13	22.7685	P11142	Heat shock cognate 71 kDa protein OS=Homo sapiens GN=HSPA8 PE=1 SV=1 - [HSP7C_HUMAN]	156.197	39.78	27	25	70.8542	P04792	Heat shock protein beta-1 OS=Homo sapiens GN=HSPB1 PE=1 SV=2 - [HSPB1_HUMAN]	65.8231	49.76	4	14	22.7685	P13645
P11498	Pyruvate carboxylase, mitochondrial OS=Homo sapiens GN=PC PE=1 SV=2 - [PYC_HUMAN]	63.4	20.88	1	19	129.551	A8K4W0	cDNA FLJ78591, highly similar to Homo sapiens ribosomal protein S3A (RPS3A), mRNA OS=Homo sapiens PE=2 SV=1 - [A8K4W0_HUMAN]	70.0552	51.52	17	14	29.9358	E9PDK5	Annexin A11 OS=Homo sapiens GN=ANXA11 PE=3 SV=1 - [E9PDK5_HUMAN]	66.3808	37.86	3	14	45.6993	Q5IST7	Heat-shock 70-kDa protein 5 (Fragment) OS=Macaca fascicularis PE=2 SV=1 - [Q5IST7_MACFA]	59.1212	33.55	2	16	66.8556	P11021	78 kDa glucose-regulated protein OS=Homo sapiens GN=HSPA5 PE=1 SV=2 - [GRP78_HUMAN]	55.368	31.19	2	16	72.2884	P05787	Keratin, type II cytoskeletal 8 OS=Homo sapiens GN=KRT8 PE=1 SV=7 - [K2C8_HUMAN]	151.82	43.89	12	27	53.6711	P68032	Actin, alpha cardiac muscle 1 OS=Homo sapiens GN=ACTC1 PE=1 SV=1 - [ACTC_HUMAN]	65.0272	37.67	26	13	41.9919	P11142
B4DMA2	cDNA FLJ54023, highly similar to Heat shock protein HSP 90-beta OS=Homo sapiens PE=2 SV=1 - [B4DMA2_HUMAN]	62.6918	28.86	2	21	79.1451	P35527	Keratin, type I cytoskeletal 9 OS=Homo sapiens GN=KRT9 PE=1 SV=3 - [K1C9_HUMAN]	62.5877	26.16	6	15	62.0268	P04259	Keratin, type II cytoskeletal 6B OS=Homo sapiens GN=KRT6B PE=1 SV=5 - [K2C6B_HUMAN]	63.8448	32.09	1	1	60.0303	P11498	Pyruvate carboxylase, mitochondrial OS=Homo sapiens GN=PC PE=1 SV=2 - [PYC_HUMAN]	55.1431	18.93	1	17	129.551	P35908	Keratin, type II cytoskeletal 2 epidermal OS=Homo sapiens GN=KRT2 PE=1 SV=2 - [K22E_HUMAN]	54.9277	33.8	9	19	65.3932	B4DP54	cDNA FLJ52712, highly similar to Tubulin beta-6 chain OS=Homo sapiens PE=2 SV=1 - [B4DP54_HUMAN]	139.362	31.1	13	13	46.6715	P11021	78 kDa glucose-regulated protein OS=Homo sapiens GN=HSPA5 PE=1 SV=2 - [GRP78_HUMAN]	64.7598	38.69	2	21	72.2884	B4DP54
P02533	Keratin, type I cytoskeletal 14 OS=Homo sapiens GN=KRT14 PE=1 SV=4 - [K1C14_HUMAN]	62.4269	31.14	1	15	51.5294	Q01813	6-phosphofructokinase type C OS=Homo sapiens GN=PFKP PE=1 SV=2 - [K6PP_HUMAN]	56.1073	24.49	15	17	85.5415	P07900	Heat shock protein HSP 90-alpha OS=Homo sapiens GN=HSP90AA1 PE=1 SV=5 - [HS90A_HUMAN]	62.6871	27.46	2	11	84.6067	P08107	Heat shock 70 kDa protein 1A/1B OS=Homo sapiens GN=HSPA1A PE=1 SV=5 - [HSP71_HUMAN]	54.8146	23.71	2	13	70.009	G3V2B8	C-1-tetrahydrofolate synthase, cytoplasmic OS=Homo sapiens GN=MTHFD1 PE=2 SV=1 - [G3V2B8_HUMAN]	54.4195	20.11	5	16	101.467	P08670	Vimentin OS=Homo sapiens GN=VIM PE=1 SV=4 - [VIME_HUMAN]	136.965	59.44	21	31	53.6191	P13645	Keratin, type I cytoskeletal 10 OS=Homo sapiens GN=KRT10 PE=1 SV=6 - [K1C10_HUMAN]	60.5372	28.25	5	19	58.7917	B4E1T1
B3KX72	Uncharacterized protein OS=Homo sapiens GN=HNRNPU PE=2 SV=1 - [B3KX72_HUMAN]	59.5888	23.47	2	16	83.033	Q5IST7	Heat-shock 70-kDa protein 5 (Fragment) OS=Macaca fascicularis PE=2 SV=1 - [Q5IST7_MACFA]	56.0458	30.23	4	14	66.8556	P05787	Keratin, type II cytoskeletal 8 OS=Homo sapiens GN=KRT8 PE=1 SV=7 - [K2C8_HUMAN]	62.2448	45.34	2	15	53.6711	B2RBR9	cDNA, FLJ95650, highly similar to Homo sapiens karyopherin (importin) beta 1 (KPNB1), mRNA OS=Homo sapiens PE=2 SV=1 - [B2RBR9_HUMAN]	54.317	17.58	2	12	97.122	A8K3K1	cDNA FLJ78096, highly similar to Homo sapiens actin, alpha, cardiac muscle (ACTC), mRNA OS=Homo sapiens PE=2 SV=1 - [A8K3K1_HUMAN]	53.5208	38.99	28	13	42.0199	P04259	Keratin, type II cytoskeletal 6B OS=Homo sapiens GN=KRT6B PE=1 SV=5 - [K2C6B_HUMAN]	127.26	37.59	10	24	60.0303	B3GQS7	Mitochondrial heat shock 60kD protein 1 variant 1 OS=Homo sapiens GN=HSPD1 PE=2 SV=1 - [B3GQS7_HUMAN]	59.1548	33.39	12	17	60.6423	Q4W4Y1
P11142	Heat shock cognate 71 kDa protein OS=Homo sapiens GN=HSPA8 PE=1 SV=1 - [HSP7C_HUMAN]	59.5574	31.27	1	17	70.8542	O00410	Importin-5 OS=Homo sapiens GN=IPO5 PE=1 SV=4 - [IPO5_HUMAN]	55.9721	19.33	27	17	123.55	P13647	Keratin, type II cytoskeletal 5 OS=Homo sapiens GN=KRT5 PE=1 SV=3 - [K2C5_HUMAN]	60.7408	32.88	1	11	62.34	P22626	Heterogeneous nuclear ribonucleoproteins A2/B1 OS=Homo sapiens GN=HNRNPA2B1 PE=1 SV=2 - [ROA2_HUMAN]	54.0574	42.21	1	15	37.4067	P08670	Vimentin OS=Homo sapiens GN=VIM PE=1 SV=4 - [VIME_HUMAN]	52.8964	40.56	16	19	53.6191	B4DRR0	cDNA FLJ53910, highly similar to Keratin, type II cytoskeletal 6A OS=Homo sapiens PE=2 SV=1 - [B4DRR0_HUMAN]	124.523	40	14	25	57.8032	Q01813	6-phosphofructokinase type C OS=Homo sapiens GN=PFKP PE=1 SV=2 - [K6PP_HUMAN]	58.5061	24.62	9	18	85.5415	P08670
B4E0X8	Far upstream element (FUSE) binding protein 1 OS=Homo sapiens GN=FUBP1 PE=2 SV=1 - [B4E0X8_HUMAN]	59.371	30.68	5	17	66.1908	P13647	Keratin, type II cytoskeletal 5 OS=Homo sapiens GN=KRT5 PE=1 SV=3 - [K2C5_HUMAN]	53.1563	29.83	14	18	62.34	P11498	Pyruvate carboxylase, mitochondrial OS=Homo sapiens GN=PC PE=1 SV=2 - [PYC_HUMAN]	60.5471	24.62	1	23	129.551	P35527	Keratin, type I cytoskeletal 9 OS=Homo sapiens GN=KRT9 PE=1 SV=3 - [K1C9_HUMAN]	52.6996	27.29	1	14	62.0268	B4E335	cDNA FLJ52842, highly similar to Actin, cytoplasmic 1 OS=Homo sapiens PE=2 SV=1 - [B4E335_HUMAN]	51.8283	39.03	53	12	39.2005	P23396	40S ribosomal protein S3 OS=Homo sapiens GN=RPS3 PE=1 SV=2 - [RS3_HUMAN]	111.013	59.26	17	15	26.6714	P36578	60S ribosomal protein L4 OS=Homo sapiens GN=RPL4 PE=1 SV=5 - [RL4_HUMAN]	55.225	31.62	10	12	47.6674	B4DRR0
P05787	Keratin, type II cytoskeletal 8 OS=Homo sapiens GN=KRT8 PE=1 SV=7 - [K2C8_HUMAN]	58.5814	41.2	2	21	53.6711	F5H0N0	Actin, gamma 1 OS=Homo sapiens GN=ACTG1 PE=3 SV=1 - [F5H0N0_HUMAN]	52.3438	35.74	85	10	37.3826	P35527	Keratin, type I cytoskeletal 9 OS=Homo sapiens GN=KRT9 PE=1 SV=3 - [K1C9_HUMAN]	60.0451	27.29	1	17	62.0268	P62701	40S ribosomal protein S4, X isoform OS=Homo sapiens GN=RPS4X PE=1 SV=2 - [RS4X_HUMAN]	52.6634	50.19	2	13	29.5791	P05787	Keratin, type II cytoskeletal 8 OS=Homo sapiens GN=KRT8 PE=1 SV=7 - [K2C8_HUMAN]	50.8125	32.71	15	17	53.6711	P02533	Keratin, type I cytoskeletal 14 OS=Homo sapiens GN=KRT14 PE=1 SV=4 - [K1C14_HUMAN]	103.45	34.11	12	17	51.5294	P05787	Keratin, type II cytoskeletal 8 OS=Homo sapiens GN=KRT8 PE=1 SV=7 - [K2C8_HUMAN]	53.6494	33.33	13	18	53.6711	P11021
Q2VPJ6	HSP90AA1 protein (Fragment) OS=Homo sapiens GN=HSP90AA1 PE=2 SV=1 - [Q2VPJ6_HUMAN]	57.675	30.09	3	18	68.3288	P52272-2	Isoform 2 of Heterogeneous nuclear ribonucleoprotein M OS=Homo sapiens GN=HNRNPM - [HNRPM_HUMAN]	51.5766	23.88	8	14	73.5724	B4DRR0	cDNA FLJ53910, highly similar to Keratin, type II cytoskeletal 6A OS=Homo sapiens PE=2 SV=1 - [B4DRR0_HUMAN]	58.8459	33.83	3	2	57.8032	B3KX72	Uncharacterized protein OS=Homo sapiens GN=HNRNPU PE=2 SV=1 - [B3KX72_HUMAN]	51.8945	20.13	4	14	83.033	P08107	Heat shock 70 kDa protein 1A/1B OS=Homo sapiens GN=HSPA1A PE=1 SV=5 - [HSP71_HUMAN]	50.685	29.64	17	17	70.009	P04792	Heat shock protein beta-1 OS=Homo sapiens GN=HSPB1 PE=1 SV=2 - [HSPB1_HUMAN]	102.024	46.34	4	10	22.7685	F5GZS6	4F2 cell-surface antigen heavy chain OS=Homo sapiens GN=SLC3A2 PE=2 SV=1 - [F5GZS6_HUMAN]	50.8978	26.21	10	14	64.8322	P04792
Q5IST7	Heat-shock 70-kDa protein 5 (Fragment) OS=Macaca fascicularis PE=2 SV=1 - [Q5IST7_MACFA]	56.0202	32.23	2	15	66.8556	H0YN42	Annexin A2 (Fragment) OS=Homo sapiens GN=ANXA2 PE=4 SV=1 - [H0YN42_HUMAN]	49.7707	55.08	27	11	28.8068	Q9BUJ2-2	Isoform 2 of Heterogeneous nuclear ribonucleoprotein U-like protein 1 OS=Homo sapiens GN=HNRNPUL1 - [HNRL1_HUMAN]	57.7177	20.27	3	14	90.2358	Q9Y678	Coatomer subunit gamma OS=Homo sapiens GN=COPG PE=1 SV=1 - [COPG_HUMAN]	49.5871	20.82	1	13	97.6555	P36578	60S ribosomal protein L4 OS=Homo sapiens GN=RPL4 PE=1 SV=5 - [RL4_HUMAN]	48.3969	31.62	10	12	47.6674	Q4W4Y1	Dopamine receptor interacting protein 4 OS=Homo sapiens GN=DRIP4 PE=2 SV=1 - [Q4W4Y1_HUMAN]	99.1027	26.04	7	23	96.0192	Q96BA7	HNRPU protein OS=Homo sapiens PE=2 SV=1 - [Q96BA7_HUMAN]	50.6952	21.47	6	16	79.6658	B3KX72
Q9NTZ6	RNA-binding protein 12 OS=Homo sapiens GN=RBM12 PE=1 SV=1 - [RBM12_HUMAN]	54.8864	20.71	2	16	97.3334	F5H365	Sec23 homolog A (S. cerevisiae) OS=Homo sapiens GN=SEC23A PE=4 SV=1 - [F5H365_HUMAN]	49.4605	22.55	18	13	82.9156	P22626	Heterogeneous nuclear ribonucleoproteins A2/B1 OS=Homo sapiens GN=HNRNPA2B1 PE=1 SV=2 - [ROA2_HUMAN]	55.3055	38.53	1	12	37.4067	P14618	Pyruvate kinase isozymes M1/M2 OS=Homo sapiens GN=PKM2 PE=1 SV=4 - [KPYM_HUMAN]	49.3583	33.9	1	14	57.9	B4DSQ5	cDNA FLJ53608, highly similar to Protein transport protein Sec23A OS=Homo sapiens PE=2 SV=1 - [B4DSQ5_HUMAN]	46.2776	24.05	15	14	82.8745	B3KX72	cDNA FLJ44920 fis, clone BRAMY3011501, highly similar to Heterogeneous nuclear ribonucleoprotein U OS=Homo sapiens PE=2 SV=1 - [B3KX72_HUMAN]	95.5219	22.93	7	19	83.033	B2RBR9	cDNA, FLJ95650, highly similar to Homo sapiens karyopherin (importin) beta 1 (KPNB1), mRNA OS=Homo sapiens PE=2 SV=1 - [B2RBR9_HUMAN]	50.1369	18.61	8	12	97.122	B2R853
P08670	Vimentin OS=Homo sapiens GN=VIM PE=1 SV=4 - [VIME_HUMAN]	53.1151	33.69	1	14	53.6191	P22626-2	Isoform A2 of Heterogeneous nuclear ribonucleoproteins A2/B1 OS=Homo sapiens GN=HNRNPA2B1 - [ROA2_HUMAN]	49.1913	38.71	2	13	35.9839	P11142	Heat shock cognate 71 kDa protein OS=Homo sapiens GN=HSPA8 PE=1 SV=1 - [HSP7C_HUMAN]	55.1681	31.58	1	16	70.8542	Q5T6W5	Heterogeneous nuclear ribonucleoprotein K OS=Homo sapiens GN=HNRNPK PE=2 SV=1 - [Q5T6W5_HUMAN]	49.3105	33.88	5	11	47.5276	B4DSN3	cDNA FLJ60345, highly similar to Protein transport protein Sec24C OS=Homo sapiens PE=2 SV=1 - [B4DSN3_HUMAN]	46.1629	24.51	6	19	106.492	B3GQS7	Mitochondrial heat shock 60kD protein 1 variant 1 OS=Homo sapiens GN=HSPD1 PE=2 SV=1 - [B3GQS7_HUMAN]	93.605	34.45	13	18	60.6423	A6NKZ8	Putative tubulin beta chain-like protein ENSP00000290377 OS=Homo sapiens PE=5 SV=2 - [YI016_HUMAN]	49.9555	11.83	2	6	41.7481	P52272
F5H365	Sec23 homolog A (S. cerevisiae) OS=Homo sapiens GN=SEC23A PE=4 SV=1 - [F5H365_HUMAN]	52.2844	24.86	2	14	82.9156	B5BTY7	T-complex protein 1 subunit beta OS=Homo sapiens GN=CCT2 PE=2 SV=1 - [B5BTY7_HUMAN]	48.0216	27.85	10	11	57.4241	P02533	Keratin, type I cytoskeletal 14 OS=Homo sapiens GN=KRT14 PE=1 SV=4 - [K1C14_HUMAN]	54.4667	31.57	1	3	51.5294	H0YMD0	Annexin A2 (Fragment) OS=Homo sapiens GN=ANXA2 PE=4 SV=1 - [H0YMD0_HUMAN]	48.2275	62.11	5	11	25.326	B4E022	Transketolase OS=Homo sapiens GN=TKT PE=2 SV=1 - [B4E022_HUMAN]	45.4871	26.74	7	14	62.8393	P61247	40S ribosomal protein S3a OS=Homo sapiens GN=RPS3A PE=1 SV=2 - [RS3A_HUMAN]	92.3526	58.33	16	16	29.9257	P00338	L-lactate dehydrogenase A chain OS=Homo sapiens GN=LDHA PE=1 SV=2 - [LDHA_HUMAN]	48.4071	42.17	9	12	36.6654	B4E0X8
F5H0L8	SEC23 interacting protein OS=Homo sapiens GN=SEC23IP PE=4 SV=1 - [F5H0L8_HUMAN]	50.5412	22.31	2	16	89.6104	P14618	Pyruvate kinase isozymes M1/M2 OS=Homo sapiens GN=PKM2 PE=1 SV=4 - [KPYM_HUMAN]	48.0203	29.38	22	12	57.9	F5H365	Sec23 homolog A (S. cerevisiae) OS=Homo sapiens GN=SEC23A PE=4 SV=1 - [F5H365_HUMAN]	53.7082	26.77	2	13	82.9156	A8K7F6	cDNA FLJ78244, highly similar to Homo sapiens eukaryotic translation initiation factor 4A, isoform 1 (EIF4A1), mRNA OS=Homo sapiens PE=2 SV=1 - [A8K7F6_HUMAN]	48.22	34.73	2	14	46.0926	P13645	Keratin, type I cytoskeletal 10 OS=Homo sapiens GN=KRT10 PE=1 SV=6 - [K1C10_HUMAN]	45.2363	22.09	4	15	58.7917	B4E335	cDNA FLJ52842, highly similar to Actin, cytoplasmic 1 OS=Homo sapiens PE=2 SV=1 - [B4E335_HUMAN]	89.6307	37.32	53	12	39.2005	Q96IR1	RPS4X protein (Fragment) OS=Homo sapiens GN=RPS4X PE=2 SV=2 - [Q96IR1_HUMAN]	47.1476	50.21	12	13	27.2427	B4DLW8
Q13085	Acetyl-CoA carboxylase 1 OS=Homo sapiens GN=ACACA PE=1 SV=2 - [ACACA_HUMAN]	48.8909	9.46	4	19	265.385	A8K7F6	cDNA FLJ78244, highly similar to Homo sapiens eukaryotic translation initiation factor 4A, isoform 1 (EIF4A1), mRNA OS=Homo sapiens PE=2 SV=1 - [A8K7F6_HUMAN]	47.7548	33.74	21	12	46.0926	Q9NTZ6	RNA-binding protein 12 OS=Homo sapiens GN=RBM12 PE=1 SV=1 - [RBM12_HUMAN]	51.4233	20.17	2	16	97.3334	B4E0X8	Far upstream element (FUSE) binding protein 1 OS=Homo sapiens GN=FUBP1 PE=2 SV=1 - [B4E0X8_HUMAN]	47.215	24.01	6	13	66.1908	A6NKZ8	Putative tubulin beta chain-like protein ENSP00000290377 OS=Homo sapiens PE=5 SV=2 - [YI016_HUMAN]	44.7412	13.98	2	7	41.7481	G3V2B8	C-1-tetrahydrofolate synthase, cytoplasmic OS=Homo sapiens GN=MTHFD1 PE=2 SV=1 - [G3V2B8_HUMAN]	87.4607	24.06	5	21	101.467	D6RG13	40S ribosomal protein S3a (Fragment) OS=Homo sapiens GN=RPS3A PE=2 SV=1 - [D6RG13_HUMAN]	46.5086	61.88	16	13	25.5914	Q13085
B4DLW8	cDNA FLJ59339, highly similar to Probable ATP-dependent RNA helicase DDX5 (EC 3.6.1.-) OS=Homo sapiens PE=2 SV=1 - [B4DLW8_HUMAN]	47.8882	32.52	5	18	60.5254	P11498	Pyruvate carboxylase, mitochondrial OS=Homo sapiens GN=PC PE=1 SV=2 - [PYC_HUMAN]	47.2988	18.17	4	17	129.551	B3KX72	Uncharacterized protein OS=Homo sapiens GN=HNRNPU PE=2 SV=1 - [B3KX72_HUMAN]	49.9728	21.6	4	14	83.033	O00410	Importin-5 OS=Homo sapiens GN=IPO5 PE=1 SV=4 - [IPO5_HUMAN]	46.7842	14.59	2	13	123.55	Q4W4Y1	Dopamine receptor interacting protein 4 OS=Homo sapiens GN=DRIP4 PE=2 SV=1 - [Q4W4Y1_HUMAN]	44.5817	18.66	6	14	96.0192	Q96IR1	RPS4X protein (Fragment) OS=Homo sapiens GN=RPS4X PE=2 SV=2 - [Q96IR1_HUMAN]	87.3744	55.97	12	15	27.2427	P08107	Heat shock 70 kDa protein 1A/1B OS=Homo sapiens GN=HSPA1A PE=1 SV=5 - [HSP71_HUMAN]	46.3753	23.24	17	13	70.009	P02533
P98082-3	Isoform 3 of Disabled homolog 2 OS=Homo sapiens GN=DAB2 - [DAB2_HUMAN]	47.8425	15.75	3	10	80.179	P62736	Actin, aortic smooth muscle OS=Homo sapiens GN=ACTA2 PE=1 SV=1 - [ACTA_HUMAN]	46.4898	33.16	26	10	41.9818	Q1KMD3	Heterogeneous nuclear ribonucleoprotein U-like protein 2 OS=Homo sapiens GN=HNRNPUL2 PE=1 SV=1 - [HNRL2_HUMAN]	49.8017	17.14	1	13	85.0522	E9PDK5	Annexin A11 OS=Homo sapiens GN=ANXA11 PE=3 SV=1 - [E9PDK5_HUMAN]	46.1979	38.83	3	13	45.6993	Q96BA7	HNRPU protein OS=Homo sapiens PE=2 SV=1 - [Q96BA7_HUMAN]	44.2549	20.91	6	16	79.6658	P78371	T-complex protein 1 subunit beta OS=Homo sapiens GN=CCT2 PE=1 SV=4 - [TCPB_HUMAN]	85.6631	32.71	5	17	57.4521	B4DSQ5	cDNA FLJ53608, highly similar to Protein transport protein Sec23A OS=Homo sapiens PE=2 SV=1 - [B4DSQ5_HUMAN]	46.2462	23.91	8	14	82.8745	B4E335
Q9BUJ2-2	Isoform 2 of Heterogeneous nuclear ribonucleoprotein U-like protein 1 OS=Homo sapiens GN=HNRNPUL1 - [HNRL1_HUMAN]	47.1282	19.9	3	12	90.2358	Q5T6W5	Heterogeneous nuclear ribonucleoprotein K OS=Homo sapiens GN=HNRNPK PE=2 SV=1 - [Q5T6W5_HUMAN]	46.1292	36.21	10	12	47.5276	Q04695	Keratin, type I cytoskeletal 17 OS=Homo sapiens GN=KRT17 PE=1 SV=2 - [K1C17_HUMAN]	47.056	30.79	1	5	48.076	P08670	Vimentin OS=Homo sapiens GN=VIM PE=1 SV=4 - [VIME_HUMAN]	45.5358	33.48	1	14	53.6191	P11940	Polyadenylate-binding protein 1 OS=Homo sapiens GN=PABPC1 PE=1 SV=2 - [PABP1_HUMAN]	44.1661	26.57	24	15	70.6259	P53621	Coatomer subunit alpha OS=Homo sapiens GN=COPA PE=1 SV=2 - [COPA_HUMAN]	83.9166	20.59	1	21	138.258	B4DSN3	cDNA FLJ60345, highly similar to Protein transport protein Sec24C OS=Homo sapiens PE=2 SV=1 - [B4DSN3_HUMAN]	45.903	19.9	6	16	106.492	A6NKZ8
F6KPG5	Albumin (Fragment) OS=Homo sapiens PE=2 SV=1 - [F6KPG5_HUMAN]	46.994	19.15	6	12	66.488	Q4W4Y1	Dopamine receptor interacting protein 4 OS=Homo sapiens GN=DRIP4 PE=2 SV=1 - [Q4W4Y1_HUMAN]	46.0307	19.93	11	15	96.0192	H0Y3P2	Eukaryotic translation initiation factor 4 gamma, 2 OS=Homo sapiens GN=EIF4G2 PE=4 SV=1 - [H0Y3P2_HUMAN]	46.4904	19.68	6	16	98.0557	P13639	Elongation factor 2 OS=Homo sapiens GN=EEF2 PE=1 SV=4 - [EF2_HUMAN]	45.2565	17.48	1	14	95.277	P31327	Carbamoyl-phosphate synthase [ammonia], mitochondrial OS=Homo sapiens GN=CPS1 PE=1 SV=2 - [CPSM_HUMAN]	44.122	13.8	12	17	164.835	P52272	Heterogeneous nuclear ribonucleoprotein M OS=Homo sapiens GN=HNRNPM PE=1 SV=3 - [HNRPM_HUMAN]	82.0775	31.23	13	21	77.4643	P11940	Polyadenylate-binding protein 1 OS=Homo sapiens GN=PABPC1 PE=1 SV=2 - [PABP1_HUMAN]	45.1783	26.73	23	15	70.6259	B4DVE7
P22626	Heterogeneous nuclear ribonucleoproteins A2/B1 OS=Homo sapiens GN=HNRNPA2B1 PE=1 SV=2 - [ROA2_HUMAN]	46.7255	38.53	1	15	37.4067	P55060-3	Isoform 3 of Exportin-2 OS=Homo sapiens GN=CSE1L - [XPO2_HUMAN]	45.9461	17.35	13	12	107.709	B4DLW8	cDNA FLJ59339, highly similar to Probable ATP-dependent RNA helicase DDX5 (EC 3.6.1.-) OS=Homo sapiens PE=2 SV=1 - [B4DLW8_HUMAN]	43.1167	25.79	4	12	60.5254	P04792	Heat shock protein beta-1 OS=Homo sapiens GN=HSPB1 PE=1 SV=2 - [HSPB1_HUMAN]	45.144	43.41	1	10	22.7685	P06493	Cyclin-dependent kinase 1 OS=Homo sapiens GN=CDK1 PE=1 SV=3 - [CDK1_HUMAN]	42.416	44.78	5	12	34.0739	P11021	78 kDa glucose-regulated protein OS=Homo sapiens GN=HSPA5 PE=1 SV=2 - [GRP78_HUMAN]	80.3392	29.05	2	16	72.2884	G3V2B8	C-1-tetrahydrofolate synthase, cytoplasmic OS=Homo sapiens GN=MTHFD1 PE=2 SV=1 - [G3V2B8_HUMAN]	44.9859	17.97	5	14	101.467	B4DSQ5
B4E3E8	DEAD (Asp-Glu-Ala-Asp) box polypeptide 3, X-linked OS=Homo sapiens GN=DDX3X PE=2 SV=1 - [B4E3E8_HUMAN]	46.0972	27.55	4	15	71.3109	B2RBR9	cDNA, FLJ95650, highly similar to Homo sapiens karyopherin (importin) beta 1 (KPNB1), mRNA OS=Homo sapiens PE=2 SV=1 - [B2RBR9_HUMAN]	45.6482	14.04	6	9	97.122	B4DSN3	cDNA FLJ60345, highly similar to Protein transport protein Sec24C OS=Homo sapiens PE=2 SV=1 - [B4DSN3_HUMAN]	43.069	18.77	3	13	106.492	Q59EF6	Calpain 2, large [catalytic] subunit variant (Fragment) OS=Homo sapiens PE=2 SV=1 - [Q59EF6_HUMAN]	45.1328	18.52	1	13	83.0563	B4E0X8	cDNA FLJ61021, highly similar to Far upstream element-binding protein 1 OS=Homo sapiens PE=2 SV=1 - [B4E0X8_HUMAN]	41.5643	26.07	8	14	66.1908	B4DSQ5	cDNA FLJ53608, highly similar to Protein transport protein Sec23A OS=Homo sapiens PE=2 SV=1 - [B4DSQ5_HUMAN]	80.09	26.49	7	16	82.8745	F5H365	Protein transport protein Sec23A OS=Homo sapiens GN=SEC23A PE=2 SV=1 - [F5H365_HUMAN]	43.8569	24.32	12	14	82.9156	B4DSN3
Q04695	Keratin, type I cytoskeletal 17 OS=Homo sapiens GN=KRT17 PE=1 SV=2 - [K1C17_HUMAN]	45.1527	30.32	1	14	48.076	E9PDK5	Annexin A11 OS=Homo sapiens GN=ANXA11 PE=3 SV=1 - [E9PDK5_HUMAN]	45.4706	30.83	11	11	45.6993	B4DVQ0	cDNA FLJ58286, highly similar to Actin, cytoplasmic 2 OS=Homo sapiens PE=2 SV=1 - [B4DVQ0_HUMAN]	42.8716	33.63	10	3	37.3246	P55060-3	Isoform 3 of Exportin-2 OS=Homo sapiens GN=CSE1L - [XPO2_HUMAN]	44.0885	15.56	2	11	107.709	P07355	Annexin A2 OS=Homo sapiens GN=ANXA2 PE=1 SV=2 - [ANXA2_HUMAN]	41.1675	34.22	25	11	38.5798	B4DLW8	Probable ATP-dependent RNA helicase DDX5 OS=Homo sapiens GN=DDX5 PE=2 SV=1 - [B4DLW8_HUMAN]	78.5487	36.82	14	20	60.5254	P07355	Annexin A2 OS=Homo sapiens GN=ANXA2 PE=1 SV=2 - [ANXA2_HUMAN]	43.1248	39.23	25	12	38.5798	P08779
Q8WWM7-6	Isoform 6 of Ataxin-2-like protein OS=Homo sapiens GN=ATXN2L - [ATX2L_HUMAN]	43.9441	19.83	8	15	102.831	E7EUQ8	Pyruvate kinase OS=Homo sapiens GN=PKM2 PE=3 SV=1 - [E7EUQ8_HUMAN]	45.1906	27.98	14	11	56.0088	Q9UMX0-2	Isoform 2 of Ubiquilin-1 OS=Homo sapiens GN=UBQLN1 - [UBQL1_HUMAN]	42.3917	15.15	4	3	59.1828	Q8WWM7-6	Isoform 6 of Ataxin-2-like protein OS=Homo sapiens GN=ATXN2L - [ATX2L_HUMAN]	43.7179	16.53	8	13	102.831	P68104	Elongation factor 1-alpha 1 OS=Homo sapiens GN=EEF1A1 PE=1 SV=1 - [EF1A1_HUMAN]	40.5214	16.67	37	7	50.1091	F5H365	Protein transport protein Sec23A OS=Homo sapiens GN=SEC23A PE=2 SV=1 - [F5H365_HUMAN]	78.1584	26.9	11	16	82.9156	P50454	Serpin H1 OS=Homo sapiens GN=SERPINH1 PE=1 SV=2 - [SERPH_HUMAN]	42.9961	37.32	15	12	46.4112	P11940
Q1KMD3	Heterogeneous nuclear ribonucleoprotein U-like protein 2 OS=Homo sapiens GN=HNRNPUL2 PE=1 SV=1 - [HNRL2_HUMAN]	42.5882	17.94	1	13	85.0522	Q9UMX0-2	Isoform 2 of Ubiquilin-1 OS=Homo sapiens GN=UBQLN1 - [UBQL1_HUMAN]	44.3974	15.15	11	6	59.1828	P08670	Vimentin OS=Homo sapiens GN=VIM PE=1 SV=4 - [VIME_HUMAN]	41.6721	33.26	2	12	53.6191	F5H365	Sec23 homolog A (S. cerevisiae) OS=Homo sapiens GN=SEC23A PE=4 SV=1 - [F5H365_HUMAN]	43.1868	20.11	2	12	82.9156	D6RG13	40S ribosomal protein S3a (Fragment) OS=Homo sapiens GN=RPS3A PE=2 SV=1 - [D6RG13_HUMAN]	40.4377	57.85	16	12	25.5914	A8K7F6	cDNA FLJ78244, highly similar to Homo sapiens eukaryotic translation initiation factor 4A, isoform 1 (EIF4A1), mRNA OS=Homo sapiens PE=2 SV=1 - [A8K7F6_HUMAN]	77.7093	35.47	28	15	46.0926	Q4W4Y1	Dopamine receptor interacting protein 4 OS=Homo sapiens GN=DRIP4 PE=2 SV=1 - [Q4W4Y1_HUMAN]	42.7977	20.16	6	16	96.0192	Q96IR1
B7Z5E7	cDNA FLJ51046, highly similar to 60 kDa heat shock protein, mitochondrial OS=Homo sapiens PE=2 SV=1 - [B7Z5E7_HUMAN]	42.3054	30.17	4	13	55.0491	P05787	Keratin, type II cytoskeletal 8 OS=Homo sapiens GN=KRT8 PE=1 SV=7 - [K2C8_HUMAN]	44.1521	33.75	16	15	53.6711	B4DT77	Annexin A7 OS=Homo sapiens GN=ANXA7 PE=2 SV=1 - [B4DT77_HUMAN]	40.9545	37.5	8	11	37.7809	E7EUE8	Keratin 6A OS=Homo sapiens GN=KRT6A PE=3 SV=2 - [E7EUE8_HUMAN]	42.8825	30.96	7	16	55.8372	B2RBR9	cDNA, FLJ95650, highly similar to Homo sapiens karyopherin (importin) beta 1 (KPNB1), mRNA OS=Homo sapiens PE=2 SV=1 - [B2RBR9_HUMAN]	40.014	17.47	8	11	97.122	Q04695	Keratin, type I cytoskeletal 17 OS=Homo sapiens GN=KRT17 PE=1 SV=2 - [K1C17_HUMAN]	77.2906	31.25	9	15	48.076	B4E022	Transketolase OS=Homo sapiens GN=TKT PE=2 SV=1 - [B4E022_HUMAN]	41.9791	21.88	8	12	62.8393	Q8WWM7
Q9UMX0-2	Isoform 2 of Ubiquilin-1 OS=Homo sapiens GN=UBQLN1 - [UBQL1_HUMAN]	41.0338	19.07	4	8	59.1828	P04792	Heat shock protein beta-1 OS=Homo sapiens GN=HSPB1 PE=1 SV=2 - [HSPB1_HUMAN]	43.7167	47.8	4	11	22.7685	B4DZF1	cDNA FLJ56541, highly similar to Ubiquilin-2 OS=Homo sapiens PE=2 SV=1 - [B4DZF1_HUMAN]	40.8372	16.6	2	4	54.9651	Q4W4Y1	Dopamine receptor interacting protein 4 OS=Homo sapiens GN=DRIP4 PE=2 SV=1 - [Q4W4Y1_HUMAN]	42.5646	15.09	4	11	96.0192	B4DJ10	Leucine--tRNA ligase, cytoplasmic OS=Homo sapiens GN=LARS PE=2 SV=1 - [B4DJ10_HUMAN]	39.9872	13.9	14	13	127.955	P08779	Keratin, type I cytoskeletal 16 OS=Homo sapiens GN=KRT16 PE=1 SV=4 - [K1C16_HUMAN]	76.4759	28.96	13	14	51.2362	B4E0X8	cDNA FLJ61021, highly similar to Far upstream element-binding protein 1 OS=Homo sapiens PE=2 SV=1 - [B4E0X8_HUMAN]	41.8787	28.62	8	16	66.1908	B4DWG1
P61247	40S ribosomal protein S3a OS=Homo sapiens GN=RPS3A PE=1 SV=2 - [RS3A_HUMAN]	40.9476	39.77	2	9	29.9257	P04083	Annexin A1 OS=Homo sapiens GN=ANXA1 PE=1 SV=2 - [ANXA1_HUMAN]	43.579	36.42	5	12	38.69	B4E0X8	Far upstream element (FUSE) binding protein 1 OS=Homo sapiens GN=FUBP1 PE=2 SV=1 - [B4E0X8_HUMAN]	39.9895	23.05	6	11	66.1908	Q01813	6-phosphofructokinase type C OS=Homo sapiens GN=PFKP PE=1 SV=2 - [K6PP_HUMAN]	42.4136	16.84	1	12	85.5415	P15880	40S ribosomal protein S2 OS=Homo sapiens GN=RPS2 PE=1 SV=2 - [RS2_HUMAN]	39.8946	37.2	16	10	31.3046	B7Z6P1	cDNA FLJ53662, highly similar to Actin, alpha skeletal muscle OS=Homo sapiens PE=2 SV=1 - [B7Z6P1_HUMAN]	75.0635	30.9	30	10	38.5541	P08670	Vimentin OS=Homo sapiens GN=VIM PE=1 SV=4 - [VIME_HUMAN]	41.6699	35.62	16	17	53.6191	Q9NTZ6
P11940-2	Isoform 2 of Polyadenylate-binding protein 1 OS=Homo sapiens GN=PABPC1 - [PABP1_HUMAN]	39.7945	28.52	2	14	61.142	P11940-2	Isoform 2 of Polyadenylate-binding protein 1 OS=Homo sapiens GN=PABPC1 - [PABP1_HUMAN]	43.5157	28.7	29	14	61.142	Q5IST7	Heat-shock 70-kDa protein 5 (Fragment) OS=Macaca fascicularis PE=2 SV=1 - [Q5IST7_MACFA]	39.7569	26.41	2	11	66.8556	Q9BUJ2-2	Isoform 2 of Heterogeneous nuclear ribonucleoprotein U-like protein 1 OS=Homo sapiens GN=HNRNPUL1 - [HNRL1_HUMAN]	41.9878	16.67	3	12	90.2358	B4DW52	cDNA FLJ55253, highly similar to Actin, cytoplasmic 1 OS=Homo sapiens PE=2 SV=1 - [B4DW52_HUMAN]	39.16	33.14	30	9	38.6082	P35527	Keratin, type I cytoskeletal 9 OS=Homo sapiens GN=KRT9 PE=1 SV=3 - [K1C9_HUMAN]	73.9829	25.52	2	15	62.0268	P06493	Cyclin-dependent kinase 1 OS=Homo sapiens GN=CDK1 PE=1 SV=3 - [CDK1_HUMAN]	41.5936	47.47	11	12	34.0739	P78371
P04083	Annexin A1 OS=Homo sapiens GN=ANXA1 PE=1 SV=2 - [ANXA1_HUMAN]	39.2935	36.99	1	12	38.69	P04259	Keratin, type II cytoskeletal 6B OS=Homo sapiens GN=KRT6B PE=1 SV=5 - [K2C6B_HUMAN]	42.4236	21.28	8	12	60.0303	P98082-3	Isoform 3 of Disabled homolog 2 OS=Homo sapiens GN=DAB2 - [DAB2_HUMAN]	39.2178	16.96	3	11	80.179	P02533	Keratin, type I cytoskeletal 14 OS=Homo sapiens GN=KRT14 PE=1 SV=4 - [K1C14_HUMAN]	41.3312	25	1	12	51.5294	P63244	Guanine nucleotide-binding protein subunit beta-2-like 1 OS=Homo sapiens GN=GNB2L1 PE=1 SV=3 - [GBLP_HUMAN]	38.7128	34.38	23	11	35.0546	K7EQF4	Perilipin-3 OS=Homo sapiens GN=PLIN3 PE=4 SV=1 - [K7EQF4_HUMAN]	73.0507	31.99	5	10	45.7752	P31327	Carbamoyl-phosphate synthase [ammonia], mitochondrial OS=Homo sapiens GN=CPS1 PE=1 SV=2 - [CPSM_HUMAN]	40.7507	11.67	12	14	164.835	Q9BTQ7
H0YMD0	Annexin A2 (Fragment) OS=Homo sapiens GN=ANXA2 PE=4 SV=1 - [H0YMD0_HUMAN]	38.9608	48.9	5	9	25.326	O43707	Alpha-actinin-4 OS=Homo sapiens GN=ACTN4 PE=1 SV=2 - [ACTN4_HUMAN]	42.0725	19.1	30	13	104.788	F6KPG5	Albumin (Fragment) OS=Homo sapiens PE=2 SV=1 - [F6KPG5_HUMAN]	38.2653	12.48	7	9	66.488	P13647	Keratin, type II cytoskeletal 5 OS=Homo sapiens GN=KRT5 PE=1 SV=3 - [K2C5_HUMAN]	41.1605	24.41	1	13	62.34	F5GZS6	4F2 cell-surface antigen heavy chain OS=Homo sapiens GN=SLC3A2 PE=2 SV=1 - [F5GZS6_HUMAN]	37.8086	24.21	10	12	64.8322	B4E0X8	cDNA FLJ61021, highly similar to Far upstream element-binding protein 1 OS=Homo sapiens PE=2 SV=1 - [B4E0X8_HUMAN]	71.1119	25.44	8	15	66.1908	A8K7F6	cDNA FLJ78244, highly similar to Homo sapiens eukaryotic translation initiation factor 4A, isoform 1 (EIF4A1), mRNA OS=Homo sapiens PE=2 SV=1 - [A8K7F6_HUMAN]	40.4957	29.06	28	11	46.0926	B4DT77
B4DSN3	cDNA FLJ60345, highly similar to Protein transport protein Sec24C OS=Homo sapiens PE=2 SV=1 - [B4DSN3_HUMAN]	38.8471	16.62	3	13	106.492	P62701	40S ribosomal protein S4, X isoform OS=Homo sapiens GN=RPS4X PE=1 SV=2 - [RS4X_HUMAN]	41.7372	46.39	12	12	29.5791	P55060-3	Isoform 3 of Exportin-2 OS=Homo sapiens GN=CSE1L - [XPO2_HUMAN]	37.9571	15.87	2	10	107.709	B4E3E8	DEAD (Asp-Glu-Ala-Asp) box polypeptide 3, X-linked OS=Homo sapiens GN=DDX3X PE=2 SV=1 - [B4E3E8_HUMAN]	41.0523	21.36	4	12	71.3109	Q9Y678	Coatomer subunit gamma-1 OS=Homo sapiens GN=COPG1 PE=1 SV=1 - [COPG1_HUMAN]	37.6907	17.28	9	11	97.6555	P50990	T-complex protein 1 subunit theta OS=Homo sapiens GN=CCT8 PE=1 SV=4 - [TCPQ_HUMAN]	70.8141	39.05	7	20	59.5825	P22626	Heterogeneous nuclear ribonucleoproteins A2/B1 OS=Homo sapiens GN=HNRNPA2B1 PE=1 SV=2 - [ROA2_HUMAN]	40.0714	30.88	2	11	37.4067	P61247
E9PCY7	Heterogeneous nuclear ribonucleoprotein H1 (H) OS=Homo sapiens GN=HNRNPH1 PE=4 SV=1 - [E9PCY7_HUMAN]	38.3676	20.05	3	7	47.0574	P08107	Heat shock 70 kDa protein 1A/1B OS=Homo sapiens GN=HSPA1A PE=1 SV=5 - [HSP71_HUMAN]	41.6916	22.31	25	13	70.009	Q15637-5	Isoform 5 of Splicing factor 1 OS=Homo sapiens GN=SF1 - [SF01_HUMAN]	37.912	11.78	1	8	80.5685	H0Y3P2	Eukaryotic translation initiation factor 4 gamma, 2 OS=Homo sapiens GN=EIF4G2 PE=4 SV=1 - [H0Y3P2_HUMAN]	40.8315	20.48	6	17	98.0557	P62269	40S ribosomal protein S18 OS=Homo sapiens GN=RPS18 PE=1 SV=3 - [RS18_HUMAN]	37.4404	61.18	3	12	17.7079	P62750	60S ribosomal protein L23a OS=Homo sapiens GN=RPL23A PE=1 SV=1 - [RL23A_HUMAN]	69.3267	41.67	7	9	17.6841	B4DPJ2	Annexin OS=Homo sapiens PE=2 SV=1 - [B4DPJ2_HUMAN]	40.0622	29.2	7	9	45.5693	B7Z6P1
Q96I24	Far upstream element-binding protein 3 OS=Homo sapiens GN=FUBP3 PE=1 SV=2 - [FUBP3_HUMAN]	37.1053	23.78	1	12	61.6022	P06493	Cyclin-dependent kinase 1 OS=Homo sapiens GN=CDK1 PE=1 SV=3 - [CDK1_HUMAN]	41.2393	41.75	149	10	34.0739	Q13085-3	Isoform 3 of Acetyl-CoA carboxylase 1 OS=Homo sapiens GN=ACACA - [ACACA_HUMAN]	37.0518	8.16	4	15	257.075	B5BU38	Annexin I OS=Homo sapiens GN=ANXA1 PE=2 SV=1 - [B5BU38_HUMAN]	40.2229	33.53	2	10	38.656	P23396	40S ribosomal protein S3 OS=Homo sapiens GN=RPS3 PE=1 SV=2 - [RS3_HUMAN]	37.2375	53.09	17	12	26.6714	P33176	Kinesin-1 heavy chain OS=Homo sapiens GN=KIF5B PE=1 SV=1 - [KINH_HUMAN]	69.0143	20.87	32	17	109.617	P68104	Elongation factor 1-alpha 1 OS=Homo sapiens GN=EEF1A1 PE=1 SV=1 - [EF1A1_HUMAN]	39.4942	22.29	37	10	50.1091	Q92945
Q5T6F2	Ubiquitin-associated protein 2 OS=Homo sapiens GN=UBAP2 PE=1 SV=1 - [UBAP2_HUMAN]	36.9727	10.1	1	9	117.044	P08670	Vimentin OS=Homo sapiens GN=VIM PE=1 SV=4 - [VIME_HUMAN]	41.0859	29.18	17	13	53.6191	B4DWG1	cDNA FLJ55643, highly similar to SEC23-interacting protein OS=Homo sapiens PE=2 SV=1 - [B4DWG1_HUMAN]	36.7303	17.74	4	12	89.6504	Q59ET3	Chaperonin containing TCP1, subunit 6A isoform a variant (Fragment) OS=Homo sapiens PE=2 SV=1 - [Q59ET3_HUMAN]	39.9309	22.12	3	10	57.7255	B4DPJ2	Annexin OS=Homo sapiens PE=2 SV=1 - [B4DPJ2_HUMAN]	37.2134	31.14	7	10	45.5693	B4DVE7	Annexin OS=Homo sapiens GN=ANXA11 PE=2 SV=1 - [B4DVE7_HUMAN]	67.0302	28.18	7	13	51.2096	O43175	D-3-phosphoglycerate dehydrogenase OS=Homo sapiens GN=PHGDH PE=1 SV=4 - [SERA_HUMAN]	39.008	25.33	6	12	56.6144	Q5CAQ5
B4DT77	Annexin A7 OS=Homo sapiens GN=ANXA7 PE=2 SV=1 - [B4DT77_HUMAN]	36.9213	33.04	7	11	37.7809	Q9Y678	Coatomer subunit gamma OS=Homo sapiens GN=COPG PE=1 SV=1 - [COPG_HUMAN]	40.9198	15.9	9	10	97.6555	Q0IJ56	ST13 protein (Fragment) OS=Homo sapiens GN=ST13 PE=2 SV=1 - [Q0IJ56_HUMAN]	36.3861	28.39	3	8	34.9933	B4E022	Uncharacterized protein OS=Homo sapiens GN=TKT PE=2 SV=1 - [B4E022_HUMAN]	39.9167	19.62	5	12	62.8393	P06737	Glycogen phosphorylase, liver form OS=Homo sapiens GN=PYGL PE=1 SV=4 - [PYGL_HUMAN]	37.021	19.48	5	14	97.087	P08729	Keratin, type II cytoskeletal 7 OS=Homo sapiens GN=KRT7 PE=1 SV=5 - [K2C7_HUMAN]	64.7003	38.81	7	19	51.3543	P13639	Elongation factor 2 OS=Homo sapiens GN=EEF2 PE=1 SV=4 - [EF2_HUMAN]	38.0421	20.75	7	16	95.277	P07355
Q14671	Pumilio homolog 1 OS=Homo sapiens GN=PUM1 PE=1 SV=3 - [PUM1_HUMAN]	36.3797	12.48	1	12	126.395	F5H816	Phosphorylase OS=Homo sapiens GN=PYGL PE=3 SV=1 - [F5H816_HUMAN]	39.6686	21.03	14	15	93.0751	P08779	Keratin, type I cytoskeletal 16 OS=Homo sapiens GN=KRT16 PE=1 SV=4 - [K1C16_HUMAN]	35.5622	22.2	1	3	51.2362	P11586	C-1-tetrahydrofolate synthase, cytoplasmic OS=Homo sapiens GN=MTHFD1 PE=1 SV=3 - [C1TC_HUMAN]	39.5175	20.43	1	16	101.495	O43707	Alpha-actinin-4 OS=Homo sapiens GN=ACTN4 PE=1 SV=2 - [ACTN4_HUMAN]	36.4038	16.14	25	11	104.788	Q13085	Acetyl-CoA carboxylase 1 OS=Homo sapiens GN=ACACA PE=1 SV=2 - [ACACA_HUMAN]	64.6828	8.35	13	17	265.385	P23396	40S ribosomal protein S3 OS=Homo sapiens GN=RPS3 PE=1 SV=2 - [RS3_HUMAN]	37.291	56.38	17	14	26.6714	P50990
P22314	Ubiquitin-like modifier-activating enzyme 1 OS=Homo sapiens GN=UBA1 PE=1 SV=3 - [UBA1_HUMAN]	36.0642	11.06	1	8	117.774	B4E0X8	Far upstream element (FUSE) binding protein 1 OS=Homo sapiens GN=FUBP1 PE=2 SV=1 - [B4E0X8_HUMAN]	39.4011	23.53	10	13	66.1908	Q2TAM5	RELA protein OS=Homo sapiens GN=RELA PE=2 SV=1 - [Q2TAM5_HUMAN]	35.5426	32.36	6	11	42.8416	Q00610-2	Isoform 2 of Clathrin heavy chain 1 OS=Homo sapiens GN=CLTC - [CLH1_HUMAN]	38.9247	12.02	2	15	187.771	B2RAW0	cDNA, FLJ95154, highly similar to Homo sapiens disabled homolog 2, mitogen-responsive phosphoprotein (Drosophila) (DAB2), mRNA OS=Homo sapiens PE=2 SV=1 - [B2RAW0_HUMAN]	35.3328	15.45	6	10	82.4191	P12956	X-ray repair cross-complementing protein 6 OS=Homo sapiens GN=XRCC6 PE=1 SV=2 - [XRCC6_HUMAN]	62.3018	26.93	8	14	69.7991	P04083	Annexin A1 OS=Homo sapiens GN=ANXA1 PE=1 SV=2 - [ANXA1_HUMAN]	36.9868	37.57	6	10	38.69	P68104
B4DZF1	cDNA FLJ56541, highly similar to Ubiquilin-2 OS=Homo sapiens PE=2 SV=1 - [B4DZF1_HUMAN]	33.7894	20.9	2	8	54.9651	Q8WWM7	Ataxin-2-like protein OS=Homo sapiens GN=ATXN2L PE=1 SV=2 - [ATX2L_HUMAN]	38.8992	15.16	10	13	113.304	Q9NZB2	Constitutive coactivator of PPAR-gamma-like protein 1 OS=Homo sapiens GN=FAM120A PE=1 SV=2 - [F120A_HUMAN]	35.4894	14.76	2	12	121.811	Q9UMX0-2	Isoform 2 of Ubiquilin-1 OS=Homo sapiens GN=UBQLN1 - [UBQL1_HUMAN]	38.8879	17.83	4	7	59.1828	A8K7F6	cDNA FLJ78244, highly similar to Homo sapiens eukaryotic translation initiation factor 4A, isoform 1 (EIF4A1), mRNA OS=Homo sapiens PE=2 SV=1 - [A8K7F6_HUMAN]	35.0499	27.59	27	9	46.0926	Q9BTQ7	Similar to ribosomal protein L23 (Fragment) OS=Homo sapiens PE=2 SV=1 - [Q9BTQ7_HUMAN]	61.5032	52.24	6	6	14.1407	J3KR24	Isoleucine--tRNA ligase, cytoplasmic OS=Homo sapiens GN=IARS PE=4 SV=1 - [J3KR24_HUMAN]	35.9587	12.24	12	12	131.68	P22626
Q9NZB2	Constitutive coactivator of PPAR-gamma-like protein 1 OS=Homo sapiens GN=FAM120A PE=1 SV=2 - [F120A_HUMAN]	33.738	12.52	2	10	121.811	P13639	Elongation factor 2 OS=Homo sapiens GN=EEF2 PE=1 SV=4 - [EF2_HUMAN]	38.7509	17.37	9	13	95.277	A8K088	cDNA FLJ78614, highly similar to Homo sapiens eukaryotic translation initiation factor 4A, isoform 1 (EIF4A1), mRNA OS=Homo sapiens PE=2 SV=1 - [A8K088_HUMAN]	35.193	27.34	3	8	46.0965	P61247	40S ribosomal protein S3a OS=Homo sapiens GN=RPS3A PE=1 SV=2 - [RS3A_HUMAN]	38.8383	51.14	2	14	29.9257	B5BTY4	ATP-dependent RNA helicase DDX3X OS=Homo sapiens GN=DDX3X PE=2 SV=1 - [B5BTY4_HUMAN]	34.877	20.54	9	11	73.126	Q8WWM7	Ataxin-2-like protein OS=Homo sapiens GN=ATXN2L PE=1 SV=2 - [ATX2L_HUMAN]	61.4678	18.98	6	17	113.304	P04259	Keratin, type II cytoskeletal 6B OS=Homo sapiens GN=KRT6B PE=1 SV=5 - [K2C6B_HUMAN]	35.6416	19.15	3	12	60.0303	P08729
B2RBR9	cDNA, FLJ95650, highly similar to Homo sapiens karyopherin (importin) beta 1 (KPNB1), mRNA OS=Homo sapiens PE=2 SV=1 - [B2RBR9_HUMAN]	33.6366	14.16	2	10	97.122	B4E3B6	cDNA FLJ54408, highly similar to Heat shock 70 kDa protein 1 OS=Homo sapiens PE=2 SV=1 - [B4E3B6_HUMAN]	38.7373	21.16	16	12	63.8849	P11940-2	Isoform 2 of Polyadenylate-binding protein 1 OS=Homo sapiens GN=PABPC1 - [PABP1_HUMAN]	34.7712	25.96	2	9	61.142	Q92945-2	Isoform 2 of Far upstream element-binding protein 2 OS=Homo sapiens GN=KHSRP - [FUBP2_HUMAN]	38.1377	19.44	2	13	72.8513	P62241	40S ribosomal protein S8 OS=Homo sapiens GN=RPS8 PE=1 SV=2 - [RS8_HUMAN]	34.6318	58.17	3	10	24.1902	Q5T6W5	Heterogeneous nuclear ribonucleoprotein K OS=Homo sapiens GN=HNRNPK PE=2 SV=1 - [Q5T6W5_HUMAN]	60.4509	31.78	9	12	47.5276	B4DWU6	cDNA FLJ51361, highly similar to Keratin, type II cytoskeletal 6A OS=Homo sapiens PE=2 SV=1 - [B4DWU6_HUMAN]	34.8175	20.77	11	12	55.7652	Q0IJ56
O43175	D-3-phosphoglycerate dehydrogenase OS=Homo sapiens GN=PHGDH PE=1 SV=4 - [SERA_HUMAN]	32.9691	20.64	1	10	56.6144	Q96BA7	HNRPU protein OS=Homo sapiens PE=2 SV=1 - [Q96BA7_HUMAN]	38.3856	18.14	9	12	79.6658	B4E3E8	DEAD (Asp-Glu-Ala-Asp) box polypeptide 3, X-linked OS=Homo sapiens GN=DDX3X PE=2 SV=1 - [B4E3E8_HUMAN]	33.7573	16.87	4	9	71.3109	Q9NZB2	Constitutive coactivator of PPAR-gamma-like protein 1 OS=Homo sapiens GN=FAM120A PE=1 SV=2 - [F120A_HUMAN]	37.969	13.69	2	11	121.811	P22626	Heterogeneous nuclear ribonucleoproteins A2/B1 OS=Homo sapiens GN=HNRNPA2B1 PE=1 SV=2 - [ROA2_HUMAN]	34.3306	31.44	2	10	37.4067	P11940	Polyadenylate-binding protein 1 OS=Homo sapiens GN=PABPC1 PE=1 SV=2 - [PABP1_HUMAN]	60.3778	25	17	14	70.6259	P55060	Exportin-2 OS=Homo sapiens GN=CSE1L PE=1 SV=3 - [XPO2_HUMAN]	34.7103	16.99	8	13	110.346	P23396
Q0IIN1	Keratin 77 OS=Homo sapiens GN=KRT77 PE=2 SV=1 - [Q0IIN1_HUMAN]	32.2197	16.61	2	9	61.7644	F6KPG5	Albumin (Fragment) OS=Homo sapiens PE=2 SV=1 - [F6KPG5_HUMAN]	37.9263	9.57	15	6	66.488	P09651-3	Isoform 2 of Heterogeneous nuclear ribonucleoprotein A1 OS=Homo sapiens GN=HNRNPA1 - [ROA1_HUMAN]	33.7019	40.82	6	7	29.3682	P22314	Ubiquitin-like modifier-activating enzyme 1 OS=Homo sapiens GN=UBA1 PE=1 SV=3 - [UBA1_HUMAN]	37.8458	14.93	1	11	117.774	Q00610	Clathrin heavy chain 1 OS=Homo sapiens GN=CLTC PE=1 SV=5 - [CLH1_HUMAN]	34.144	10.21	4	15	191.493	P47712	Cytosolic phospholipase A2 OS=Homo sapiens GN=PLA2G4A PE=1 SV=2 - [PA24A_HUMAN]	60.2617	17.09	4	12	85.1842	B2R8R5	cDNA, FLJ94025, highly similar to Homo sapiens tripartite motif-containing 28 (TRIM28), mRNA OS=Homo sapiens PE=2 SV=1 - [B2R8R5_HUMAN]	34.2521	14.25	4	10	88.5034	F6KPG5
P55060-3	Isoform 3 of Exportin-2 OS=Homo sapiens GN=CSE1L - [XPO2_HUMAN]	31.8377	14.71	2	11	107.709	P23396	40S ribosomal protein S3 OS=Homo sapiens GN=RPS3 PE=1 SV=2 - [RS3_HUMAN]	37.5053	39.92	16	10	26.6714	B7Z4F6	cDNA FLJ54912, highly similar to 60 kDa heat shock protein, mitochondrial OS=Homo sapiens PE=2 SV=1 - [B7Z4F6_HUMAN]	33.645	25.27	3	12	58.5342	P00338	L-lactate dehydrogenase A chain OS=Homo sapiens GN=LDHA PE=1 SV=2 - [LDHA_HUMAN]	37.819	30.42	3	9	36.6654	P55060	Exportin-2 OS=Homo sapiens GN=CSE1L PE=1 SV=3 - [XPO2_HUMAN]	33.7573	16.48	8	13	110.346	P68104	Elongation factor 1-alpha 1 OS=Homo sapiens GN=EEF1A1 PE=1 SV=1 - [EF1A1_HUMAN]	59.8691	22.29	37	10	50.1091	P35527	Keratin, type I cytoskeletal 9 OS=Homo sapiens GN=KRT9 PE=1 SV=3 - [K1C9_HUMAN]	33.493	22.47	2	12	62.0268	B3GQS7
H0Y3P2	Eukaryotic translation initiation factor 4 gamma, 2 OS=Homo sapiens GN=EIF4G2 PE=4 SV=1 - [H0Y3P2_HUMAN]	31.7528	17.49	6	14	98.0557	B4E022	Uncharacterized protein OS=Homo sapiens GN=TKT PE=2 SV=1 - [B4E022_HUMAN]	37.0335	19.44	11	11	62.8393	P55795	Heterogeneous nuclear ribonucleoprotein H2 OS=Homo sapiens GN=HNRNPH2 PE=1 SV=1 - [HNRH2_HUMAN]	33.5894	15.37	1	4	49.2323	P17987	T-complex protein 1 subunit alpha OS=Homo sapiens GN=TCP1 PE=1 SV=1 - [TCPA_HUMAN]	36.7197	25.9	1	12	60.3056	P13639	Elongation factor 2 OS=Homo sapiens GN=EEF2 PE=1 SV=4 - [EF2_HUMAN]	33.6029	20.28	7	17	95.277	A8K3C3	T-complex protein 1 subunit delta OS=Homo sapiens PE=2 SV=1 - [A8K3C3_HUMAN]	57.7914	30.43	5	14	57.9158	Q9Y678	Coatomer subunit gamma-1 OS=Homo sapiens GN=COPG1 PE=1 SV=1 - [COPG1_HUMAN]	33.4147	15.56	8	11	97.6555	C9JMU5
B5BU72	Phosphatidylinositol-binding clathrin assembly protein isoform 2 OS=Homo sapiens GN=PICALM PE=2 SV=1 - [B5BU72_HUMAN]	31.503	18.03	8	9	66.3518	Q9NZB2	Constitutive coactivator of PPAR-gamma-like protein 1 OS=Homo sapiens GN=FAM120A PE=1 SV=2 - [F120A_HUMAN]	36.7208	16.28	5	13	121.811	Q96IR1	RPS4X protein (Fragment) OS=Homo sapiens GN=RPS4X PE=2 SV=2 - [Q96IR1_HUMAN]	33.3072	51.85	3	13	27.2427	B4E2Z3	Uncharacterized protein OS=Homo sapiens GN=SLC3A2 PE=2 SV=1 - [B4E2Z3_HUMAN]	36.4537	27.4	7	11	55.9047	A8K529	cDNA FLJ76184, highly similar to Homo sapiens NOL1/NOP2/Sun domain family, member 2 (NSUN2), mRNA OS=Homo sapiens PE=2 SV=1 - [A8K529_HUMAN]	32.245	17.47	5	11	86.3438	B5BTY4	ATP-dependent RNA helicase DDX3X OS=Homo sapiens GN=DDX3X PE=2 SV=1 - [B5BTY4_HUMAN]	55.6644	19.79	11	11	73.126	P52272	Heterogeneous nuclear ribonucleoprotein M OS=Homo sapiens GN=HNRNPM PE=1 SV=3 - [HNRPM_HUMAN]	33.2902	23.42	13	15	77.4643	Q96I24
Q92945-2	Isoform 2 of Far upstream element-binding protein 2 OS=Homo sapiens GN=KHSRP - [FUBP2_HUMAN]	31.4944	19.58	2	12	72.8513	P02533	Keratin, type I cytoskeletal 14 OS=Homo sapiens GN=KRT14 PE=1 SV=4 - [K1C14_HUMAN]	35.554	20.34	23	10	51.5294	Q96I24	Far upstream element-binding protein 3 OS=Homo sapiens GN=FUBP3 PE=1 SV=2 - [FUBP3_HUMAN]	33.1271	20.45	1	10	61.6022	B4DYD8	Chaperonin containing TCP1, subunit 5 (epsilon) OS=Homo sapiens GN=CCT5 PE=2 SV=1 - [B4DYD8_HUMAN]	36.2075	35.49	12	14	49.4948	P00338	L-lactate dehydrogenase A chain OS=Homo sapiens GN=LDHA PE=1 SV=2 - [LDHA_HUMAN]	32.223	37.35	9	11	36.6654	B4DZI8	Coatomer protein complex, subunit beta 2 (Beta prime), isoform CRA_b OS=Homo sapiens GN=COPB2 PE=2 SV=1 - [B4DZI8_HUMAN]	55.5449	18.36	9	15	98.9836	B2RAW0	cDNA, FLJ95154, highly similar to Homo sapiens disabled homolog 2, mitogen-responsive phosphoprotein (Drosophila) (DAB2), mRNA OS=Homo sapiens PE=2 SV=1 - [B2RAW0_HUMAN]	32.8007	17.01	6	11	82.4191	P46781
Q14157-4	Isoform 4 of Ubiquitin-associated protein 2-like OS=Homo sapiens GN=UBAP2L - [UBP2L_HUMAN]	31.4864	10.86	7	8	103.106	B4DRR0	cDNA FLJ53910, highly similar to Keratin, type II cytoskeletal 6A OS=Homo sapiens PE=2 SV=1 - [B4DRR0_HUMAN]	35.3395	24.11	17	13	57.8032	O00410	Importin-5 OS=Homo sapiens GN=IPO5 PE=1 SV=4 - [IPO5_HUMAN]	31.8496	12.49	2	10	123.55	Q09666	Neuroblast differentiation-associated protein AHNAK OS=Homo sapiens GN=AHNAK PE=1 SV=2 - [AHNK_HUMAN]	36.0662	6.49	1	14	628.699	E7EUT5	Glyceraldehyde-3-phosphate dehydrogenase OS=Homo sapiens GN=GAPDH PE=2 SV=1 - [E7EUT5_HUMAN]	32.1098	27.69	8	6	27.8531	B4DSN3	cDNA FLJ60345, highly similar to Protein transport protein Sec24C OS=Homo sapiens PE=2 SV=1 - [B4DSN3_HUMAN]	55.2145	16.21	6	13	106.492	A8K529	cDNA FLJ76184, highly similar to Homo sapiens NOL1/NOP2/Sun domain family, member 2 (NSUN2), mRNA OS=Homo sapiens PE=2 SV=1 - [A8K529_HUMAN]	32.658	17.21	5	10	86.3438	B4E1E2
F5H0N0	Actin, gamma 1 OS=Homo sapiens GN=ACTG1 PE=3 SV=1 - [F5H0N0_HUMAN]	31.2975	29.43	9	9	37.3826	P53621	Coatomer subunit alpha OS=Homo sapiens GN=COPA PE=1 SV=2 - [COPA_HUMAN]	34.906	11.44	2	12	138.258	Q8WWM7-6	Isoform 6 of Ataxin-2-like protein OS=Homo sapiens GN=ATXN2L - [ATX2L_HUMAN]	31.0049	16.32	8	12	102.831	B5BTY7	T-complex protein 1 subunit beta OS=Homo sapiens GN=CCT2 PE=2 SV=1 - [B5BTY7_HUMAN]	36.06	23.36	2	9	57.4241	H0Y3P2	Eukaryotic translation initiation factor 4 gamma 2 OS=Homo sapiens GN=EIF4G2 PE=2 SV=1 - [H0Y3P2_HUMAN]	31.9272	17.72	12	15	98.0557	P62241	40S ribosomal protein S8 OS=Homo sapiens GN=RPS8 PE=1 SV=2 - [RS8_HUMAN]	54.7442	45.67	3	8	24.1902	P53621	Coatomer subunit alpha OS=Homo sapiens GN=COPA PE=1 SV=2 - [COPA_HUMAN]	32.0479	13.56	1	14	138.258	B4E091
Q2TAM5	RELA protein OS=Homo sapiens GN=RELA PE=2 SV=1 - [Q2TAM5_HUMAN]	29.7643	32.1	6	10	42.8416	P98082-3	Isoform 3 of Disabled homolog 2 OS=Homo sapiens GN=DAB2 - [DAB2_HUMAN]	34.5578	16.42	8	11	80.179	Q92945-2	Isoform 2 of Far upstream element-binding protein 2 OS=Homo sapiens GN=KHSRP - [FUBP2_HUMAN]	29.6285	15.35	2	9	72.8513	P05787	Keratin, type II cytoskeletal 8 OS=Homo sapiens GN=KRT8 PE=1 SV=7 - [K2C8_HUMAN]	35.6994	28.16	2	13	53.6711	B4DRT3	Pyruvate kinase OS=Homo sapiens PE=2 SV=1 - [B4DRT3_HUMAN]	31.0557	23.29	11	10	55.8907	Q00610	Clathrin heavy chain 1 OS=Homo sapiens GN=CLTC PE=1 SV=5 - [CLH1_HUMAN]	54.3753	12.36	5	17	191.493	P13647	Keratin, type II cytoskeletal 5 OS=Homo sapiens GN=KRT5 PE=1 SV=3 - [K2C5_HUMAN]	31.704	16.27	7	11	62.34	A8K7F6
Q7Z417	Nuclear fragile X mental retardation-interacting protein 2 OS=Homo sapiens GN=NUFIP2 PE=1 SV=1 - [NUFP2_HUMAN]	29.3949	16.55	1	9	76.0747	B3KY79	cDNA FLJ46620 fis, clone TLUNG2000654, highly similar to Keratin, type II cytoskeletal 7 OS=Homo sapiens PE=2 SV=1 - [B3KY79_HUMAN]	34.491	25.62	14	12	49.0051	P13646-3	Isoform 3 of Keratin, type I cytoskeletal 13 OS=Homo sapiens GN=KRT13 - [K1C13_HUMAN]	29.4302	19.29	2	4	45.8386	P98082-3	Isoform 3 of Disabled homolog 2 OS=Homo sapiens GN=DAB2 - [DAB2_HUMAN]	35.41	17.76	3	11	80.179	B4DT77	Annexin OS=Homo sapiens GN=ANXA7 PE=2 SV=1 - [B4DT77_HUMAN]	30.6854	30.95	7	8	37.7809	P07355	Annexin A2 OS=Homo sapiens GN=ANXA2 PE=1 SV=2 - [ANXA2_HUMAN]	53.7856	38.05	25	13	38.5798	Q6FIG4	RAB1B protein OS=Homo sapiens GN=RAB1B PE=2 SV=1 - [Q6FIG4_HUMAN]	31.6519	34.83	20	5	22.1842	P47712
Q96IF9	VCP protein (Fragment) OS=Homo sapiens GN=VCP PE=2 SV=2 - [Q96IF9_HUMAN]	29.2256	11.8	3	5	71.0211	H0Y3P2	Eukaryotic translation initiation factor 4 gamma, 2 OS=Homo sapiens GN=EIF4G2 PE=4 SV=1 - [H0Y3P2_HUMAN]	34.3151	16.57	14	14	98.0557	B7Z6P1	cDNA FLJ53662, highly similar to Actin, alpha skeletal muscle OS=Homo sapiens PE=2 SV=1 - [B7Z6P1_HUMAN]	28.8754	27.41	4	2	38.5541	Q14157-4	Isoform 4 of Ubiquitin-associated protein 2-like OS=Homo sapiens GN=UBAP2L - [UBP2L_HUMAN]	34.6659	12.19	7	9	103.106	P06733	Alpha-enolase OS=Homo sapiens GN=ENO1 PE=1 SV=2 - [ENOA_HUMAN]	30.4698	25.58	8	9	47.1393	K7ESI9	Dynamin-2 OS=Homo sapiens GN=DNM2 PE=3 SV=1 - [K7ESI9_HUMAN]	53.7827	14.96	15	12	97.9161	H0Y3P2	Eukaryotic translation initiation factor 4 gamma 2 OS=Homo sapiens GN=EIF4G2 PE=2 SV=1 - [H0Y3P2_HUMAN]	31.2303	17.15	12	14	98.0557	Q04695
Q0IJ56	ST13 protein (Fragment) OS=Homo sapiens GN=ST13 PE=2 SV=1 - [Q0IJ56_HUMAN]	28.8436	22.9	3	7	34.9933	A8K9C4	Elongation factor 1-alpha OS=Homo sapiens PE=2 SV=1 - [A8K9C4_HUMAN]	33.5619	16.45	40	7	50.1691	O43175	D-3-phosphoglycerate dehydrogenase OS=Homo sapiens GN=PHGDH PE=1 SV=4 - [SERA_HUMAN]	28.2106	18.39	1	9	56.6144	B3KQV6	cDNA FLJ33169 fis, clone ADRGL2000384, highly similar to Serine/threonine-protein phosphatase 2A 65 kDa regulatory subunit A alpha isoform OS=Homo sapiens PE=2 SV=1 - [B3KQV6_HUMAN]	34.6572	24.63	8	7	45.5748	P35527	Keratin, type I cytoskeletal 9 OS=Homo sapiens GN=KRT9 PE=1 SV=3 - [K1C9_HUMAN]	30.267	21.19	2	11	62.0268	B2RBR9	cDNA, FLJ95650, highly similar to Homo sapiens karyopherin (importin) beta 1 (KPNB1), mRNA OS=Homo sapiens PE=2 SV=1 - [B2RBR9_HUMAN]	53.377	17.69	8	12	97.122	P63244	Guanine nucleotide-binding protein subunit beta-2-like 1 OS=Homo sapiens GN=GNB2L1 PE=1 SV=3 - [GBLP_HUMAN]	31.2233	30.6	22	9	35.0546	B4DYY5
Q96KK5	Histone H2A type 1-H OS=Homo sapiens GN=HIST1H2AH PE=1 SV=3 - [H2A1H_HUMAN]	28.4644	35.94	8	4	13.8978	B4E1R7	cDNA FLJ58224, highly similar to Calpain-2 catalytic subunit (EC 3.4.22.53) OS=Homo sapiens PE=2 SV=1 - [B4E1R7_HUMAN]	32.9593	20.46	7	10	60.4691	B2RBR9	cDNA, FLJ95650, highly similar to Homo sapiens karyopherin (importin) beta 1 (KPNB1), mRNA OS=Homo sapiens PE=2 SV=1 - [B2RBR9_HUMAN]	27.9357	12.44	2	8	97.122	P50454	Serpin H1 OS=Homo sapiens GN=SERPINH1 PE=1 SV=2 - [SERPH_HUMAN]	34.592	24.16	1	9	46.4112	P50454	Serpin H1 OS=Homo sapiens GN=SERPINH1 PE=1 SV=2 - [SERPH_HUMAN]	30.2666	25.6	14	8	46.4112	C9JMU5	Probable ATP-dependent RNA helicase DDX17 OS=Homo sapiens GN=DDX17 PE=2 SV=1 - [C9JMU5_HUMAN]	53.2191	21.63	5	13	72.5301	Q7Z759	CCT8 protein OS=Homo sapiens GN=CCT8 PE=2 SV=1 - [Q7Z759_HUMAN]	30.9717	22.74	7	9	54.0717	B2RAW0
Q5IST6	Peroxiredoxin 1 (Fragment) OS=Macaca fascicularis PE=2 SV=1 - [Q5IST6_MACFA]	28.3763	44.68	2	10	20.8527	B4DSN3	cDNA FLJ60345, highly similar to Protein transport protein Sec24C OS=Homo sapiens PE=2 SV=1 - [B4DSN3_HUMAN]	32.8928	14.87	7	12	106.492	Q7Z417	Nuclear fragile X mental retardation-interacting protein 2 OS=Homo sapiens GN=NUFIP2 PE=1 SV=1 - [NUFP2_HUMAN]	26.709	16.98	1	10	76.0747	F5H0N0	Actin, gamma 1 OS=Homo sapiens GN=ACTG1 PE=3 SV=1 - [F5H0N0_HUMAN]	34.2274	26.43	9	8	37.3826	Q92973	Transportin-1 OS=Homo sapiens GN=TNPO1 PE=1 SV=2 - [TNPO1_HUMAN]	29.7512	13.92	10	11	102.289	P08107	Heat shock 70 kDa protein 1A/1B OS=Homo sapiens GN=HSPA1A PE=1 SV=5 - [HSP71_HUMAN]	52.9734	23.71	17	12	70.009	E7EUT4	Glyceraldehyde-3-phosphate dehydrogenase OS=Homo sapiens GN=GAPDH PE=2 SV=1 - [E7EUT4_HUMAN]	30.6985	33.45	9	8	31.528	P08107
A1JUI8	Chaperonin subunit 6A (Fragment) OS=Homo sapiens GN=CCT6A PE=2 SV=1 - [A1JUI8_HUMAN]	28.0628	20.08	5	8	53.6472	B4DN87	Serpin peptidase inhibitor, clade H (heat shock protein 47), member 1, (collagen binding protein 1) OS=Homo sapiens GN=SERPINH1 PE=2 SV=1 - [B4DN87_HUMAN]	32.2723	26.2	16	9	44.1761	P68104	Elongation factor 1-alpha 1 OS=Homo sapiens GN=EEF1A1 PE=1 SV=1 - [EF1A1_HUMAN]	26.5518	16.67	10	7	50.1091	B3KY79	cDNA FLJ46620 fis, clone TLUNG2000654, highly similar to Keratin, type II cytoskeletal 7 OS=Homo sapiens PE=2 SV=1 - [B3KY79_HUMAN]	33.8385	28.99	3	13	49.0051	Q7Z3U5	Putative uncharacterized protein DKFZp686L0869 OS=Homo sapiens GN=DKFZp686L0869 PE=2 SV=1 - [Q7Z3U5_HUMAN]	29.6552	10.31	12	11	142.228	P62753	40S ribosomal protein S6 OS=Homo sapiens GN=RPS6 PE=1 SV=1 - [RS6_HUMAN]	52.8375	28.51	5	7	28.663	O00410	Importin-5 OS=Homo sapiens GN=IPO5 PE=1 SV=4 - [IPO5_HUMAN]	30.4963	9.66	17	9	123.55	E9PCY7
Q15637-5	Isoform 5 of Splicing factor 1 OS=Homo sapiens GN=SF1 - [SF01_HUMAN]	27.7626	12.83	7	8	80.5685	Q9BTQ7	Similar to ribosomal protein L23 (Fragment) OS=Homo sapiens PE=1 SV=1 - [Q9BTQ7_HUMAN]	32.1634	45.52	5	5	14.1407	B5BU72	Phosphatidylinositol-binding clathrin assembly protein isoform 2 OS=Homo sapiens GN=PICALM PE=2 SV=1 - [B5BU72_HUMAN]	26.4248	16.56	8	8	66.3518	Q04695	Keratin, type I cytoskeletal 17 OS=Homo sapiens GN=KRT17 PE=1 SV=2 - [K1C17_HUMAN]	33.8128	23.38	1	11	48.076	P49588	Alanine--tRNA ligase, cytoplasmic OS=Homo sapiens GN=AARS PE=1 SV=2 - [SYAC_HUMAN]	29.2528	11.47	3	9	106.743	P46781	40S ribosomal protein S9 OS=Homo sapiens GN=RPS9 PE=1 SV=3 - [RS9_HUMAN]	52.3687	41.24	5	13	22.5776	P62241	40S ribosomal protein S8 OS=Homo sapiens GN=RPS8 PE=1 SV=2 - [RS8_HUMAN]	30.0932	52.88	3	9	24.1902	F8VZY9
Q92841	Probable ATP-dependent RNA helicase DDX17 OS=Homo sapiens GN=DDX17 PE=1 SV=1 - [DDX17_HUMAN]	27.2122	16.46	7	9	72.326	Q04695	Keratin, type I cytoskeletal 17 OS=Homo sapiens GN=KRT17 PE=1 SV=2 - [K1C17_HUMAN]	32.0211	22.92	19	11	48.076	P22314	Ubiquitin-like modifier-activating enzyme 1 OS=Homo sapiens GN=UBA1 PE=1 SV=3 - [UBA1_HUMAN]	25.9748	11.06	1	8	117.774	P52272-2	Isoform 2 of Heterogeneous nuclear ribonucleoprotein M OS=Homo sapiens GN=HNRNPM - [HNRPM_HUMAN]	33.7876	20.98	2	12	73.5724	Q5CAQ5	Tumor rejection antigen (Gp96) 1 OS=Homo sapiens GN=TRA1 PE=2 SV=1 - [Q5CAQ5_HUMAN]	29.0916	14.96	9	11	92.2823	H0YA55	Serum albumin (Fragment) OS=Homo sapiens GN=ALB PE=4 SV=1 - [H0YA55_HUMAN]	51.816	12.11	12	7	51.5358	B4DYY5	cDNA FLJ55671, highly similar to Ubiquitin-associated protein 2-like OS=Homo sapiens PE=2 SV=1 - [B4DYY5_HUMAN]	29.8213	10.11	9	8	113.491	P62269
P31942-3	Isoform 3 of Heterogeneous nuclear ribonucleoprotein H3 OS=Homo sapiens GN=HNRNPH3 - [HNRH3_HUMAN]	27.0929	19.87	4	5	31.5054	B3KQV6	cDNA FLJ33169 fis, clone ADRGL2000384, highly similar to Serine/threonine-protein phosphatase 2A 65 kDa regulatory subunit A alpha isoform OS=Homo sapiens PE=2 SV=1 - [B3KQV6_HUMAN]	31.9588	24.63	21	7	45.5748	Q5T6W5	Heterogeneous nuclear ribonucleoprotein K OS=Homo sapiens GN=HNRNPK PE=2 SV=1 - [Q5T6W5_HUMAN]	25.5002	23.83	6	7	47.5276	P08758	Annexin A5 OS=Homo sapiens GN=ANXA5 PE=1 SV=2 - [ANXA5_HUMAN]	33.7375	35.63	1	10	35.9144	B3KNI2	cDNA FLJ14650 fis, clone NT2RP2002185, highly similar to Ubiquilin-1 OS=Homo sapiens PE=2 SV=1 - [B3KNI2_HUMAN]	28.8524	14.43	5	6	62.4455	P49327	Fatty acid synthase OS=Homo sapiens GN=FASN PE=1 SV=3 - [FAS_HUMAN]	51.6457	6.65	2	14	273.254	Q5T6W5	Heterogeneous nuclear ribonucleoprotein K OS=Homo sapiens GN=HNRNPK PE=2 SV=1 - [Q5T6W5_HUMAN]	29.3102	27.34	9	9	47.5276	H0Y3P2
B7Z5W0	cDNA FLJ53174, highly similar to Numb-like protein OS=Homo sapiens PE=2 SV=1 - [B7Z5W0_HUMAN]	26.1627	17.84	3	8	60.5187	B4E2Z3	Uncharacterized protein OS=Homo sapiens GN=SLC3A2 PE=2 SV=1 - [B4E2Z3_HUMAN]	31.8713	25.44	13	10	55.9047	A8K2S1	cDNA FLJ75258, highly similar to Homo sapiens phospholipase A2, group IVA (cytosolic, calcium-dependent) (PLA2G4A), mRNA OS=Homo sapiens PE=2 SV=1 - [A8K2S1_HUMAN]	25.3594	14.82	2	10	85.1823	Q9NTZ6	RNA-binding protein 12 OS=Homo sapiens GN=RBM12 PE=1 SV=1 - [RBM12_HUMAN]	33.347	15.13	2	13	97.3334	P14868	Aspartate--tRNA ligase, cytoplasmic OS=Homo sapiens GN=DARS PE=1 SV=2 - [SYDC_HUMAN]	27.7867	27.35	10	11	57.1	Q53HV2	Chaperonin containing TCP1, subunit 7 (Eta) variant (Fragment) OS=Homo sapiens PE=2 SV=1 - [Q53HV2_HUMAN]	51.609	23.94	8	12	59.3029	K7EQF4	Perilipin-3 OS=Homo sapiens GN=PLIN3 PE=4 SV=1 - [K7EQF4_HUMAN]	28.487	23.46	5	7	45.7752	P0CW22
Q5T6W5	Heterogeneous nuclear ribonucleoprotein K OS=Homo sapiens GN=HNRNPK PE=2 SV=1 - [Q5T6W5_HUMAN]	26.1415	25	6	8	47.5276	B3KX11	cDNA FLJ44436 fis, clone UTERU2019706, highly similar to T-complex protein 1 subunit gamma OS=Homo sapiens PE=2 SV=1 - [B3KX11_HUMAN]	31.7769	26.63	12	12	57.909	P52597	Heterogeneous nuclear ribonucleoprotein F OS=Homo sapiens GN=HNRNPF PE=1 SV=3 - [HNRPF_HUMAN]	25.3405	19.28	1	5	45.6429	P68104	Elongation factor 1-alpha 1 OS=Homo sapiens GN=EEF1A1 PE=1 SV=1 - [EF1A1_HUMAN]	32.9181	19.91	10	9	50.1091	B7Z9L0	T-complex protein 1 subunit delta OS=Homo sapiens GN=CCT4 PE=2 SV=1 - [B7Z9L0_HUMAN]	27.6168	27.74	5	11	52.2979	B4DWG1	cDNA FLJ55643, highly similar to SEC23-interacting protein OS=Homo sapiens PE=2 SV=1 - [B4DWG1_HUMAN]	51.5436	17.62	7	12	89.6504	A8K6Q8	cDNA FLJ75881, highly similar to Homo sapiens transferrin receptor (p90, CD71) (TFRC), mRNA OS=Homo sapiens PE=2 SV=1 - [A8K6Q8_HUMAN]	28.4601	15	6	9	84.8199	B4DUR8
B2R704	cDNA, FLJ93207, highly similar to Homo sapiens microtubule-associated protein 7 (MAP7), mRNA OS=Homo sapiens PE=2 SV=1 - [B2R704_HUMAN]	25.7858	15.49	4	11	83.9324	B4DT77	Annexin A7 OS=Homo sapiens GN=ANXA7 PE=2 SV=1 - [B4DT77_HUMAN]	31.196	35.42	8	10	37.7809	B3KY79	cDNA FLJ46620 fis, clone TLUNG2000654, highly similar to Keratin, type II cytoskeletal 7 OS=Homo sapiens PE=2 SV=1 - [B3KY79_HUMAN]	25.2951	23.6	3	7	49.0051	P06493	Cyclin-dependent kinase 1 OS=Homo sapiens GN=CDK1 PE=1 SV=3 - [CDK1_HUMAN]	32.8102	43.1	2	10	34.0739	P22314	Ubiquitin-like modifier-activating enzyme 1 OS=Homo sapiens GN=UBA1 PE=1 SV=3 - [UBA1_HUMAN]	27.1667	9.07	5	6	117.774	P07814	Bifunctional glutamate/proline--tRNA ligase OS=Homo sapiens GN=EPRS PE=1 SV=5 - [SYEP_HUMAN]	51.2874	12.1	5	16	170.483	M0R3F1	Heterogeneous nuclear ribonucleoprotein U-like protein 1 (Fragment) OS=Homo sapiens GN=HNRNPUL1 PE=4 SV=1 - [M0R3F1_HUMAN]	27.4945	19.19	10	10	71.677	Q14444
Q8WUF5	RelA-associated inhibitor OS=Homo sapiens GN=PPP1R13L PE=1 SV=4 - [IASPP_HUMAN]	25.7266	14.86	1	10	89.0357	B4DLW8	cDNA FLJ59339, highly similar to Probable ATP-dependent RNA helicase DDX5 (EC 3.6.1.-) OS=Homo sapiens PE=2 SV=1 - [B4DLW8_HUMAN]	31.1679	21.68	10	13	60.5254	B5BU38	Annexin I OS=Homo sapiens GN=ANXA1 PE=2 SV=1 - [B5BU38_HUMAN]	25.1002	27.17	2	7	38.656	O43707	Alpha-actinin-4 OS=Homo sapiens GN=ACTN4 PE=1 SV=2 - [ACTN4_HUMAN]	32.0314	16.03	1	11	104.788	P02533	Keratin, type I cytoskeletal 14 OS=Homo sapiens GN=KRT14 PE=1 SV=4 - [K1C14_HUMAN]	27.0111	22.03	18	11	51.5294	F8VZY9	Keratin, type I cytoskeletal 18 OS=Homo sapiens GN=KRT18 PE=2 SV=1 - [F8VZY9_HUMAN]	50.9745	32.23	6	15	43.7474	B7ZLF0	Fibronectin 1 OS=Homo sapiens GN=FN1 PE=2 SV=1 - [B7ZLF0_HUMAN]	26.4396	5.84	25	10	239.471	B5BTY4
B4DRD7	Poly(rC) binding protein 2 OS=Homo sapiens GN=PCBP2 PE=2 SV=1 - [B4DRD7_HUMAN]	25.522	34.4	6	8	29.7182	B4E3E8	DEAD (Asp-Glu-Ala-Asp) box polypeptide 3, X-linked OS=Homo sapiens GN=DDX3X PE=2 SV=1 - [B4E3E8_HUMAN]	30.7366	14.4	21	8	71.3109	P08107	Heat shock 70 kDa protein 1A/1B OS=Homo sapiens GN=HSPA1A PE=1 SV=5 - [HSP71_HUMAN]	25.091	18.41	3	8	70.009	Q15645	Pachytene checkpoint protein 2 homolog OS=Homo sapiens GN=TRIP13 PE=1 SV=2 - [PCH2_HUMAN]	31.3698	19.21	1	8	48.5205	O43175	D-3-phosphoglycerate dehydrogenase OS=Homo sapiens GN=PHGDH PE=1 SV=4 - [SERA_HUMAN]	26.9656	21.58	6	10	56.6144	P62269	40S ribosomal protein S18 OS=Homo sapiens GN=RPS18 PE=1 SV=3 - [RS18_HUMAN]	50.9112	49.34	3	10	17.7079	F6KPG5	Albumin (Fragment) OS=Homo sapiens PE=2 SV=1 - [F6KPG5_HUMAN]	26.4278	11.11	13	7	66.488	F8W7C6
P52597	Heterogeneous nuclear ribonucleoprotein F OS=Homo sapiens GN=HNRNPF PE=1 SV=3 - [HNRPF_HUMAN]	25.2763	21.2	1	7	45.6429	B4DYD8	Chaperonin containing TCP1, subunit 5 (epsilon) OS=Homo sapiens GN=CCT5 PE=2 SV=1 - [B4DYD8_HUMAN]	30.4504	24.33	17	10	49.4948	Q8NA80	cDNA FLJ35762 fis, clone TESTI2004793, moderately similar to Homo sapiens NY-REN-2 antigen mRNA OS=Homo sapiens PE=2 SV=1 - [Q8NA80_HUMAN]	25.045	15.17	3	4	58.2732	B7Z4T9	Chaperonin containing TCP1, subunit 7 (Eta), isoform CRA_c OS=Homo sapiens GN=CCT7 PE=2 SV=1 - [B7Z4T9_HUMAN]	30.7981	27.86	4	12	54.7695	A8K492	cDNA FLJ76789, highly similar to Homo sapiens methionine-tRNA synthetase (MARS), mRNA OS=Homo sapiens PE=2 SV=1 - [A8K492_HUMAN]	26.7998	12.44	9	8	101.08	P22314	Ubiquitin-like modifier-activating enzyme 1 OS=Homo sapiens GN=UBA1 PE=1 SV=3 - [UBA1_HUMAN]	50.617	12.57	7	10	117.774	P43243	Matrin-3 OS=Homo sapiens GN=MATR3 PE=1 SV=2 - [MATR3_HUMAN]	26.384	12.51	11	8	94.5648	A8K3C3
B3KY79	cDNA FLJ46620 fis, clone TLUNG2000654, highly similar to Keratin, type II cytoskeletal 7 OS=Homo sapiens PE=2 SV=1 - [B3KY79_HUMAN]	25.1565	23.6	3	12	49.0051	P27824	Calnexin OS=Homo sapiens GN=CANX PE=1 SV=2 - [CALX_HUMAN]	30.1342	13.68	15	8	67.5259	Q9H0D6-2	Isoform 2 of 5'-3' exoribonuclease 2 OS=Homo sapiens GN=XRN2 - [XRN2_HUMAN]	23.7884	14.3	4	10	99.8981	B1ANR0	Poly(A) binding protein, cytoplasmic 4 (Inducible form) OS=Homo sapiens GN=PABPC4 PE=4 SV=1 - [B1ANR0_HUMAN]	30.5993	17.56	5	8	67.9279	O95373	Importin-7 OS=Homo sapiens GN=IPO7 PE=1 SV=1 - [IPO7_HUMAN]	26.6504	12.43	4	10	119.44	P36578	60S ribosomal protein L4 OS=Homo sapiens GN=RPL4 PE=1 SV=5 - [RL4_HUMAN]	50.2449	26.93	10	12	47.6674	B4DT77	Annexin OS=Homo sapiens GN=ANXA7 PE=2 SV=1 - [B4DT77_HUMAN]	26.2436	32.14	7	9	37.7809	P36578
Q96IR1	RPS4X protein (Fragment) OS=Homo sapiens GN=RPS4X PE=2 SV=2 - [Q96IR1_HUMAN]	25.1498	31.69	3	7	27.2427	Q9BUJ2-2	Isoform 2 of Heterogeneous nuclear ribonucleoprotein U-like protein 1 OS=Homo sapiens GN=HNRNPUL1 - [HNRL1_HUMAN]	29.8501	12.56	12	8	90.2358	Q5CAQ5	Tumor rejection antigen (Gp96) 1 OS=Homo sapiens GN=TRA1 PE=2 SV=1 - [Q5CAQ5_HUMAN]	23.667	11.72	2	7	92.2823	F6KPG5	Albumin (Fragment) OS=Homo sapiens PE=2 SV=1 - [F6KPG5_HUMAN]	30.4104	16.92	7	10	66.488	F5GWP8	Junction plakoglobin OS=Homo sapiens GN=JUP PE=2 SV=1 - [F5GWP8_HUMAN]	26.4777	15.91	12	10	66.3088	Q92945	Far upstream element-binding protein 2 OS=Homo sapiens GN=KHSRP PE=1 SV=4 - [FUBP2_HUMAN]	49.9157	16.88	5	13	73.07	P62269	40S ribosomal protein S18 OS=Homo sapiens GN=RPS18 PE=1 SV=3 - [RS18_HUMAN]	25.4124	55.26	3	10	17.7079	Q8WX93
G5E9B2	Chaperonin containing TCP1, subunit 8 (Theta), isoform CRA_a OS=Homo sapiens GN=CCT8 PE=3 SV=1 - [G5E9B2_HUMAN]	24.9224	20.48	3	10	59.4404	P17858	6-phosphofructokinase, liver type OS=Homo sapiens GN=PFKL PE=1 SV=6 - [K6PL_HUMAN]	29.7149	11.92	11	7	84.9642	Q14671	Pumilio homolog 1 OS=Homo sapiens GN=PUM1 PE=1 SV=3 - [PUM1_HUMAN]	23.5573	8.43	1	6	126.395	B4DLW8	cDNA FLJ59339, highly similar to Probable ATP-dependent RNA helicase DDX5 (EC 3.6.1.-) OS=Homo sapiens PE=2 SV=1 - [B4DLW8_HUMAN]	30.0954	24.3	4	13	60.5254	K7EQF4	Perilipin-3 OS=Homo sapiens GN=PLIN3 PE=4 SV=1 - [K7EQF4_HUMAN]	26.3863	22.75	5	7	45.7752	P22626	Heterogeneous nuclear ribonucleoproteins A2/B1 OS=Homo sapiens GN=HNRNPA2B1 PE=1 SV=2 - [ROA2_HUMAN]	49.8872	32.86	2	11	37.4067	Q1KMD3	Heterogeneous nuclear ribonucleoprotein U-like protein 2 OS=Homo sapiens GN=HNRNPUL2 PE=1 SV=1 - [HNRL2_HUMAN]	25.0505	15.8	2	10	85.0522	P22314
P09651-3	Isoform 2 of Heterogeneous nuclear ribonucleoprotein A1 OS=Homo sapiens GN=HNRNPA1 - [ROA1_HUMAN]	24.7079	34.83	6	8	29.3682	Q59ET3	Chaperonin containing TCP1, subunit 6A isoform a variant (Fragment) OS=Homo sapiens PE=2 SV=1 - [Q59ET3_HUMAN]	29.3789	20.6	10	9	57.7255	Q96DH6-2	Isoform 2 of RNA-binding protein Musashi homolog 2 OS=Homo sapiens GN=MSI2 - [MSI2H_HUMAN]	23.5221	32.27	3	6	28.4021	P09651-3	Isoform 2 of Heterogeneous nuclear ribonucleoprotein A1 OS=Homo sapiens GN=HNRNPA1 - [ROA1_HUMAN]	30.0829	40.45	6	9	29.3682	P62424	60S ribosomal protein L7a OS=Homo sapiens GN=RPL7A PE=1 SV=2 - [RL7A_HUMAN]	26.2149	28.2	4	7	29.977	B4DYY5	cDNA FLJ55671, highly similar to Ubiquitin-associated protein 2-like OS=Homo sapiens PE=2 SV=1 - [B4DYY5_HUMAN]	48.1872	13.08	9	10	113.491	B3KX11	cDNA FLJ44436 fis, clone UTERU2019706, highly similar to T-complex protein 1 subunit gamma OS=Homo sapiens PE=2 SV=1 - [B3KX11_HUMAN]	24.9131	18.97	11	9	57.909	P62753
O60664	Perilipin-3 OS=Homo sapiens GN=PLIN3 PE=1 SV=3 - [PLIN3_HUMAN]	24.6623	20.05	1	6	47.0459	P08758	Annexin A5 OS=Homo sapiens GN=ANXA5 PE=1 SV=2 - [ANXA5_HUMAN]	28.8616	32.81	12	10	35.9144	H0YMD0	Annexin A2 (Fragment) OS=Homo sapiens GN=ANXA2 PE=4 SV=1 - [H0YMD0_HUMAN]	23.3615	36.12	5	8	25.326	E7EUT4	Glyceraldehyde-3-phosphate dehydrogenase OS=Homo sapiens GN=GAPDH PE=3 SV=1 - [E7EUT4_HUMAN]	29.248	31.74	3	7	31.528	Q0IJ56	ST13 protein (Fragment) OS=Homo sapiens GN=ST13 PE=2 SV=1 - [Q0IJ56_HUMAN]	26.0805	30.97	12	8	34.9933	Q15365	Poly(rC)-binding protein 1 OS=Homo sapiens GN=PCBP1 PE=1 SV=2 - [PCBP1_HUMAN]	48.0106	25.28	1	8	37.4739	P17858	6-phosphofructokinase, liver type OS=Homo sapiens GN=PFKL PE=1 SV=6 - [K6PL_HUMAN]	24.874	14.62	4	9	84.9642	A8K6V3
F5H442	Tumor susceptibility gene 101 OS=Homo sapiens GN=TSG101 PE=4 SV=1 - [F5H442_HUMAN]	24.4799	24.38	2	7	40.8917	Q15645	Pachytene checkpoint protein 2 homolog OS=Homo sapiens GN=TRIP13 PE=1 SV=2 - [PCH2_HUMAN]	28.6371	28.7	3	10	48.5205	Q13148	TAR DNA-binding protein 43 OS=Homo sapiens GN=TARDBP PE=1 SV=1 - [TADBP_HUMAN]	23.2783	17.87	2	6	44.7113	P43243	Matrin-3 OS=Homo sapiens GN=MATR3 PE=1 SV=2 - [MATR3_HUMAN]	29.1742	13.81	2	10	94.5648	P04259	Keratin, type II cytoskeletal 6B OS=Homo sapiens GN=KRT6B PE=1 SV=5 - [K2C6B_HUMAN]	25.9041	16.13	19	10	60.0303	B3KX11	cDNA FLJ44436 fis, clone UTERU2019706, highly similar to T-complex protein 1 subunit gamma OS=Homo sapiens PE=2 SV=1 - [B3KX11_HUMAN]	47.8156	25.86	11	12	57.909	E9PCY7	Heterogeneous nuclear ribonucleoprotein H OS=Homo sapiens GN=HNRNPH1 PE=2 SV=1 - [E9PCY7_HUMAN]	24.7766	16.32	20	6	47.0574	Q15645
B4DY09	cDNA FLJ51660, highly similar to Interleukin enhancer-binding factor 2 OS=Homo sapiens PE=2 SV=1 - [B4DY09_HUMAN]	24.1576	23.86	3	8	38.8862	B7Z4T9	Chaperonin containing TCP1, subunit 7 (Eta), isoform CRA_c OS=Homo sapiens GN=CCT7 PE=2 SV=1 - [B7Z4T9_HUMAN]	28.4948	24.65	11	11	54.7695	Q96EP5-2	Isoform 2 of DAZ-associated protein 1 OS=Homo sapiens GN=DAZAP1 - [DAZP1_HUMAN]	22.1046	16.67	3	4	40.5038	H0Y4R1	IMP (inosine 5'-monophosphate) dehydrogenase 2 (Fragment) OS=Homo sapiens GN=IMPDH2 PE=4 SV=1 - [H0Y4R1_HUMAN]	28.9377	22.98	2	9	51.0352	Q04695	Keratin, type I cytoskeletal 17 OS=Homo sapiens GN=KRT17 PE=1 SV=2 - [K1C17_HUMAN]	25.8544	21.53	9	10	48.076	E9PCY7	Heterogeneous nuclear ribonucleoprotein H OS=Homo sapiens GN=HNRNPH1 PE=2 SV=1 - [E9PCY7_HUMAN]	47.2353	20.05	21	7	47.0574	B1ANR0	Poly(A) binding protein, cytoplasmic 4 (Inducible form), isoform CRA_e OS=Homo sapiens GN=PABPC4 PE=4 SV=1 - [B1ANR0_HUMAN]	24.4442	14.47	12	8	67.9279	Q53HV2
G3V2B8	Methylenetetrahydrofolate dehydrogenase (NADP+ dependent) 1, methenyltetrahydrofolate cyclohydrolase, formyltetrahydrofolate synthetase OS=Homo sapiens GN=MTHFD1 PE=3 SV=1 - [G3V2B8_HUMAN]	24.1501	13.69	4	10	101.467	Q14157-4	Isoform 4 of Ubiquitin-associated protein 2-like OS=Homo sapiens GN=UBAP2L - [UBP2L_HUMAN]	28.2332	11.37	17	8	103.106	P13639	Elongation factor 2 OS=Homo sapiens GN=EEF2 PE=1 SV=4 - [EF2_HUMAN]	22.0046	11.89	1	9	95.277	B4DUB7	Phosphorylase OS=Homo sapiens PE=2 SV=1 - [B4DUB7_HUMAN]	28.595	21.16	4	14	92.949	O75533	Splicing factor 3B subunit 1 OS=Homo sapiens GN=SF3B1 PE=1 SV=3 - [SF3B1_HUMAN]	25.7964	8.44	5	8	145.738	Q5CAQ5	Tumor rejection antigen (Gp96) 1 OS=Homo sapiens GN=TRA1 PE=2 SV=1 - [Q5CAQ5_HUMAN]	46.5592	15.21	9	12	92.2823	B4DRD7	cDNA FLJ54752, highly similar to Poly(rC)-binding protein 2 OS=Homo sapiens PE=2 SV=1 - [B4DRD7_HUMAN]	24.4165	34.4	12	8	29.7182	C9JXB8
B4E1R7	cDNA FLJ58224, highly similar to Calpain-2 catalytic subunit (EC 3.4.22.53) OS=Homo sapiens PE=2 SV=1 - [B4E1R7_HUMAN]	23.9505	17.4	2	8	60.4691	P07384	Calpain-1 catalytic subunit OS=Homo sapiens GN=CAPN1 PE=1 SV=1 - [CAN1_HUMAN]	28.1882	14.01	15	10	81.8382	G3V2B8	Methylenetetrahydrofolate dehydrogenase (NADP+ dependent) 1, methenyltetrahydrofolate cyclohydrolase, formyltetrahydrofolate synthetase OS=Homo sapiens GN=MTHFD1 PE=3 SV=1 - [G3V2B8_HUMAN]	21.9483	8.45	4	9	101.467	B4E0U6	cDNA FLJ53687, highly similar to Hsc70-interacting protein OS=Homo sapiens PE=2 SV=1 - [B4E0U6_HUMAN]	28.4909	23.68	4	7	40.1359	Q9BTQ7	Similar to ribosomal protein L23 (Fragment) OS=Homo sapiens PE=2 SV=1 - [Q9BTQ7_HUMAN]	25.7839	48.51	6	6	14.1407	B4E091	cDNA FLJ55438, highly similar to Splicing factor 3 subunit 1 OS=Homo sapiens PE=2 SV=1 - [B4E091_HUMAN]	46.5489	16.52	3	10	77.3577	P80723	Brain acid soluble protein 1 OS=Homo sapiens GN=BASP1 PE=1 SV=2 - [BASP1_HUMAN]	24.3126	40.53	1	7	22.68	Q15365
A8K2S1	cDNA FLJ75258, highly similar to Homo sapiens phospholipase A2, group IVA (cytosolic, calcium-dependent) (PLA2G4A), mRNA OS=Homo sapiens PE=2 SV=1 - [A8K2S1_HUMAN]	23.7886	10.95	2	8	85.1823	P25705	ATP synthase subunit alpha, mitochondrial OS=Homo sapiens GN=ATP5A1 PE=1 SV=1 - [ATPA_HUMAN]	28.1249	22.78	4	10	59.7136	Q9Y5A9-2	Isoform 2 of YTH domain family protein 2 OS=Homo sapiens GN=YTHDF2 - [YTHD2_HUMAN]	21.0921	15.5	4	4	56.8421	B4DQW2	NOL1/NOP2/Sun domain family, member 2, isoform CRA_a OS=Homo sapiens GN=NSUN2 PE=2 SV=1 - [B4DQW2_HUMAN]	28.4463	16.53	3	10	82.3407	B2RBA6	cDNA, FLJ95407, highly similar to Homo sapiens MCM7 minichromosome maintenance deficient 7 (S. cerevisiae) (MCM7), mRNA OS=Homo sapiens PE=2 SV=1 - [B2RBA6_HUMAN]	25.5191	17.11	6	10	81.2286	B2RAW0	cDNA, FLJ95154, highly similar to Homo sapiens disabled homolog 2, mitogen-responsive phosphoprotein (Drosophila) (DAB2), mRNA OS=Homo sapiens PE=2 SV=1 - [B2RAW0_HUMAN]	46.1107	15.32	6	10	82.4191	Q0IJ56	ST13 protein (Fragment) OS=Homo sapiens GN=ST13 PE=2 SV=1 - [Q0IJ56_HUMAN]	24.2283	23.87	11	6	34.9933	Q06830
B3KM89	cDNA FLJ10528 fis, clone NT2RP2000943, highly similar to Protein transport protein Sec24D OS=Homo sapiens PE=2 SV=1 - [B3KM89_HUMAN]	23.5686	11.92	3	8	100.183	P17655	Calpain-2 catalytic subunit OS=Homo sapiens GN=CAPN2 PE=1 SV=6 - [CAN2_HUMAN]	28.0658	15.29	6	9	79.9448	F8W1R7	Myosin, light chain 6, alkali, smooth muscle and non-muscle OS=Homo sapiens GN=MYL6 PE=4 SV=1 - [F8W1R7_HUMAN]	20.9779	42.07	6	5	16.2798	B4DSN3	cDNA FLJ60345, highly similar to Protein transport protein Sec24C OS=Homo sapiens PE=2 SV=1 - [B4DSN3_HUMAN]	28.2285	13.64	4	10	106.492	B7Z582	cDNA FLJ53638, highly similar to Annexin A6 OS=Homo sapiens PE=2 SV=1 - [B7Z582_HUMAN]	25.3453	20.11	7	9	61.8135	B4DYC8	cDNA FLJ52361, highly similar to T-complex protein 1 subunit epsilon OS=Homo sapiens PE=2 SV=1 - [B4DYC8_HUMAN]	44.7589	26.54	15	14	53.8621	E9PM69	26S protease regulatory subunit 6A OS=Homo sapiens GN=PSMC3 PE=2 SV=1 - [E9PM69_HUMAN]	24.0923	22.17	8	6	44.2958	Q5JR95
O43684-2	Isoform 2 of Mitotic checkpoint protein BUB3 OS=Homo sapiens GN=BUB3 - [BUB3_HUMAN]	23.549	24.23	2	8	36.9311	P17987	T-complex protein 1 subunit alpha OS=Homo sapiens GN=TCP1 PE=1 SV=1 - [TCPA_HUMAN]	27.4175	21.76	10	11	60.3056	E9M4D4	Hemoglobin alpha-1 globin chain (Fragment) OS=Homo sapiens GN=HBA1 PE=3 SV=1 - [E9M4D4_HUMAN]	20.9002	49	2	4	10.7765	B4DWG1	cDNA FLJ55643, highly similar to SEC23-interacting protein OS=Homo sapiens PE=2 SV=1 - [B4DWG1_HUMAN]	28.0385	14.58	4	9	89.6504	O00410	Importin-5 OS=Homo sapiens GN=IPO5 PE=1 SV=4 - [IPO5_HUMAN]	25.3347	10.57	8	9	123.55	O43399	Tumor protein D54 OS=Homo sapiens GN=TPD52L2 PE=1 SV=2 - [TPD54_HUMAN]	44.606	42.72	6	8	22.2243	M0R0F0	40S ribosomal protein S5 (Fragment) OS=Homo sapiens GN=RPS5 PE=3 SV=1 - [M0R0F0_HUMAN]	24.0756	19	5	5	22.3768	P15880
Q15645	Pachytene checkpoint protein 2 homolog OS=Homo sapiens GN=TRIP13 PE=1 SV=2 - [PCH2_HUMAN]	23.1964	18.29	1	6	48.5205	B4DWG1	cDNA FLJ55643, highly similar to SEC23-interacting protein OS=Homo sapiens PE=2 SV=1 - [B4DWG1_HUMAN]	27.4132	14.2	6	9	89.6504	P23396	40S ribosomal protein S3 OS=Homo sapiens GN=RPS3 PE=1 SV=2 - [RS3_HUMAN]	20.8643	39.51	1	9	26.6714	B7Z6M1	Plastin 3 OS=Homo sapiens GN=PLS3 PE=2 SV=1 - [B7Z6M1_HUMAN]	27.8472	22.22	4	11	65.5908	F8W7C6	60S ribosomal protein L10 OS=Homo sapiens GN=RPL10 PE=2 SV=1 - [F8W7C6_HUMAN]	25.2556	33.74	5	6	18.5797	Q15645	Pachytene checkpoint protein 2 homolog OS=Homo sapiens GN=TRIP13 PE=1 SV=2 - [PCH2_HUMAN]	44.2731	21.99	2	8	48.5205	A6NHL2	Tubulin alpha chain-like 3 OS=Homo sapiens GN=TUBAL3 PE=1 SV=2 - [TBAL3_HUMAN]	23.7319	10.31	1	5	49.8767	Q9NZB2
Q5ISU0	Elongation factor 1-alpha (Fragment) OS=Macaca fascicularis PE=2 SV=1 - [Q5ISU0_MACFA]	22.6109	15.13	11	6	46.0367	E7EWF1	Ribosomal protein L4 OS=Homo sapiens GN=RPL4 PE=4 SV=1 - [E7EWF1_HUMAN]	27.2315	23.65	8	7	45.47	F5GZ86	Signal transducer and activator of transcription 6, interleukin-4 induced OS=Homo sapiens GN=STAT6 PE=4 SV=1 - [F5GZ86_HUMAN]	20.6388	11.49	5	6	76.0297	E9PCY7	Heterogeneous nuclear ribonucleoprotein H1 (H) OS=Homo sapiens GN=HNRNPH1 PE=4 SV=1 - [E9PCY7_HUMAN]	27.8007	20.05	3	7	47.0574	Q5T6W5	Heterogeneous nuclear ribonucleoprotein K OS=Homo sapiens GN=HNRNPK PE=2 SV=1 - [Q5T6W5_HUMAN]	25.225	24.07	9	8	47.5276	O00410	Importin-5 OS=Homo sapiens GN=IPO5 PE=1 SV=4 - [IPO5_HUMAN]	44.2567	9.85	17	9	123.55	B5BTY4	ATP-dependent RNA helicase DDX3X OS=Homo sapiens GN=DDX3X PE=2 SV=1 - [B5BTY4_HUMAN]	23.648	15.11	10	8	73.126	G3V0E5
O75340	Programmed cell death protein 6 OS=Homo sapiens GN=PDCD6 PE=1 SV=1 - [PDCD6_HUMAN]	22.6086	32.98	1	6	21.8548	P51991	Heterogeneous nuclear ribonucleoprotein A3 OS=Homo sapiens GN=HNRNPA3 PE=1 SV=2 - [ROA3_HUMAN]	27.2057	24.6	9	9	39.5706	E7EWI9	Heterogeneous nuclear ribonucleoprotein A3 OS=Homo sapiens GN=HNRNPA3 PE=4 SV=1 - [E7EWI9_HUMAN]	20.535	17.08	5	4	34.081	Q5R209	Carbamoylphosphate synthetase I OS=Homo sapiens GN=CPS1 PE=2 SV=1 - [Q5R209_HUMAN]	27.4417	8.33	8	8	138.315	B3KXA2	cDNA FLJ45031 fis, clone BRAWH3018548, highly similar to Vinculin OS=Homo sapiens PE=2 SV=1 - [B3KXA2_HUMAN]	25.1248	10.74	6	8	110.237	P17987	T-complex protein 1 subunit alpha OS=Homo sapiens GN=TCP1 PE=1 SV=1 - [TCPA_HUMAN]	44.1796	23.38	10	11	60.3056	P78371	T-complex protein 1 subunit beta OS=Homo sapiens GN=CCT2 PE=1 SV=4 - [TCPB_HUMAN]	23.5871	14.77	5	7	57.4521	K7ESI9
Q7RTS7	Keratin, type II cytoskeletal 74 OS=Homo sapiens GN=KRT74 PE=1 SV=2 - [K2C74_HUMAN]	22.3941	7.75	3	5	57.8296	Q9NTZ6	RNA-binding protein 12 OS=Homo sapiens GN=RBM12 PE=1 SV=1 - [RBM12_HUMAN]	27.0663	14.06	7	10	97.3334	B4DZF6	cDNA FLJ54206, highly similar to Ubiquilin-4 OS=Homo sapiens PE=2 SV=1 - [B4DZF6_HUMAN]	20.3476	11.19	3	3	62.1456	G5E9B2	Chaperonin containing TCP1, subunit 8 (Theta), isoform CRA_a OS=Homo sapiens GN=CCT8 PE=3 SV=1 - [G5E9B2_HUMAN]	27.3483	23.95	3	11	59.4404	A8K781	cDNA FLJ75299, highly similar to Xenopus laevis proteasome (prosome, macropain) 26S subunit, ATPase 3, mRNA OS=Homo sapiens PE=2 SV=1 - [A8K781_HUMAN]	24.7098	19.62	9	6	47.2925	H0Y3P2	Eukaryotic translation initiation factor 4 gamma 2 OS=Homo sapiens GN=EIF4G2 PE=2 SV=1 - [H0Y3P2_HUMAN]	42.7268	16.92	12	14	98.0557	P54136	Arginine--tRNA ligase, cytoplasmic OS=Homo sapiens GN=RARS PE=1 SV=2 - [SYRC_HUMAN]	23.2088	15.45	5	9	75.3309	P62805
P62979	Ubiquitin-40S ribosomal protein S27a OS=Homo sapiens GN=RPS27A PE=1 SV=2 - [RS27A_HUMAN]	22.2119	32.69	2	5	17.9535	E7EUT4	Glyceraldehyde-3-phosphate dehydrogenase OS=Homo sapiens GN=GAPDH PE=3 SV=1 - [E7EUT4_HUMAN]	26.7503	35.49	11	9	31.528	P27824	Calnexin OS=Homo sapiens GN=CANX PE=1 SV=2 - [CALX_HUMAN]	20.104	13.34	2	8	67.5259	P22234	Multifunctional protein ADE2 OS=Homo sapiens GN=PAICS PE=1 SV=3 - [PUR6_HUMAN]	27.3194	20.71	1	8	47.0491	B4DLW8	Probable ATP-dependent RNA helicase DDX5 OS=Homo sapiens GN=DDX5 PE=2 SV=1 - [B4DLW8_HUMAN]	24.5936	19.44	11	10	60.5254	B4DT77	Annexin OS=Homo sapiens GN=ANXA7 PE=2 SV=1 - [B4DT77_HUMAN]	42.6766	38.1	7	12	37.7809	G3V0E8	Poly(RC) binding protein 2, isoform CRA_f OS=Homo sapiens GN=PCBP2 PE=4 SV=1 - [G3V0E8_HUMAN]	23.1613	29.25	13	8	33.4753	G3V2B8
Q13283	Ras GTPase-activating protein-binding protein 1 OS=Homo sapiens GN=G3BP1 PE=1 SV=1 - [G3BP1_HUMAN]	22.1877	16.52	2	5	52.1321	Q8NA80	cDNA FLJ35762 fis, clone TESTI2004793, moderately similar to Homo sapiens NY-REN-2 antigen mRNA OS=Homo sapiens PE=2 SV=1 - [Q8NA80_HUMAN]	26.7075	15.54	6	7	58.2732	B7Z5W0	cDNA FLJ53174, highly similar to Numb-like protein OS=Homo sapiens PE=2 SV=1 - [B7Z5W0_HUMAN]	19.6455	14.13	3	5	60.5187	A4QPB0	IQ motif containing GTPase activating protein 1 OS=Homo sapiens GN=IQGAP1 PE=2 SV=1 - [A4QPB0_HUMAN]	27.2078	7	2	8	189.162	P62277	40S ribosomal protein S13 OS=Homo sapiens GN=RPS13 PE=1 SV=2 - [RS13_HUMAN]	24.1042	37.75	3	6	17.2117	P62277	40S ribosomal protein S13 OS=Homo sapiens GN=RPS13 PE=1 SV=2 - [RS13_HUMAN]	42.4085	43.71	3	7	17.2117	Q5CAQ5	Tumor rejection antigen (Gp96) 1 OS=Homo sapiens GN=TRA1 PE=2 SV=1 - [Q5CAQ5_HUMAN]	22.7922	9.85	8	8	92.2823	O43175
P43243	Matrin-3 OS=Homo sapiens GN=MATR3 PE=1 SV=2 - [MATR3_HUMAN]	21.639	8.62	3	6	94.5648	B7Z9L0	T-complex protein 1 subunit delta OS=Homo sapiens GN=CCT4 PE=2 SV=1 - [B7Z9L0_HUMAN]	26.5687	21.74	7	9	52.2979	O60664-3	Isoform 3 of Perilipin-3 OS=Homo sapiens GN=PLIN3 - [PLIN3_HUMAN]	19.5738	19.4	2	6	46.9179	E7EWI9	Heterogeneous nuclear ribonucleoprotein A3 OS=Homo sapiens GN=HNRNPA3 PE=4 SV=1 - [E7EWI9_HUMAN]	27.1464	32.3	5	9	34.081	B2R8R5	cDNA, FLJ94025, highly similar to Homo sapiens tripartite motif-containing 28 (TRIM28), mRNA OS=Homo sapiens PE=2 SV=1 - [B2R8R5_HUMAN]	24.0932	8.98	3	6	88.5034	A5A3E0	POTE ankyrin domain family member F OS=Homo sapiens GN=POTEF PE=1 SV=2 - [POTEF_HUMAN]	42.2733	6.42	7	6	121.367	A8K9J7	Histone H2B OS=Homo sapiens PE=2 SV=1 - [A8K9J7_HUMAN]	22.7792	34.13	19	4	13.9876	A8K3Q9
Q8WX93-3	Isoform 3 of Palladin OS=Homo sapiens GN=PALLD - [PALLD_HUMAN]	21.5973	9.89	2	9	108.564	Q13283	Ras GTPase-activating protein-binding protein 1 OS=Homo sapiens GN=G3BP1 PE=1 SV=1 - [G3BP1_HUMAN]	26.4709	20.82	14	7	52.1321	Q6UUV7-3	Isoform 3 of CREB-regulated transcription coactivator 3 OS=Homo sapiens GN=CRTC3 - [CRTC3_HUMAN]	19.5531	11.81	2	5	66.7892	B3KVX6	cDNA FLJ41699 fis, clone HCHON2004776, highly similar to Homo sapiens cytoskeleton-associated protein 4 (CKAP4), mRNA OS=Homo sapiens PE=2 SV=1 - [B3KVX6_HUMAN]	27.1223	23.8	4	9	58.1158	P04083	Annexin A1 OS=Homo sapiens GN=ANXA1 PE=1 SV=2 - [ANXA1_HUMAN]	23.9355	23.7	5	7	38.69	B4E0U6	cDNA FLJ53687, highly similar to Hsc70-interacting protein OS=Homo sapiens PE=2 SV=1 - [B4E0U6_HUMAN]	41.8863	23.96	12	8	40.1359	P27824	Calnexin OS=Homo sapiens GN=CANX PE=1 SV=2 - [CALX_HUMAN]	22.5965	14.86	13	8	67.5259	P62277
A8K7F6	cDNA FLJ78244, highly similar to Homo sapiens eukaryotic translation initiation factor 4A, isoform 1 (EIF4A1), mRNA OS=Homo sapiens PE=2 SV=1 - [A8K7F6_HUMAN]	21.5971	18.72	2	7	46.0926	Q92841	Probable ATP-dependent RNA helicase DDX17 OS=Homo sapiens GN=DDX17 PE=1 SV=1 - [DDX17_HUMAN]	26.0585	12.77	11	7	72.326	D6RG13	Ribosomal protein S3A (Fragment) OS=Homo sapiens GN=RPS3A PE=3 SV=1 - [D6RG13_HUMAN]	19.4096	43.5	4	9	25.5914	Q15637-5	Isoform 5 of Splicing factor 1 OS=Homo sapiens GN=SF1 - [SF01_HUMAN]	26.9505	13.61	1	8	80.5685	Q1KMD3	Heterogeneous nuclear ribonucleoprotein U-like protein 2 OS=Homo sapiens GN=HNRNPUL2 PE=1 SV=1 - [HNRL2_HUMAN]	23.8443	16.33	2	11	85.0522	O43175	D-3-phosphoglycerate dehydrogenase OS=Homo sapiens GN=PHGDH PE=1 SV=4 - [SERA_HUMAN]	41.7064	21.95	6	10	56.6144	P12956	X-ray repair cross-complementing protein 6 OS=Homo sapiens GN=XRCC6 PE=1 SV=2 - [XRCC6_HUMAN]	22.584	14.94	8	8	69.7991	A5A3E0
Q6NSF2	RPLP0 protein OS=Homo sapiens GN=RPLP0 PE=2 SV=1 - [Q6NSF2_HUMAN]	21.5816	27.95	6	6	27.2813	B2RBA6	cDNA, FLJ95407, highly similar to Homo sapiens MCM7 minichromosome maintenance deficient 7 (S. cerevisiae) (MCM7), mRNA OS=Homo sapiens PE=2 SV=1 - [B2RBA6_HUMAN]	26.0145	17.66	11	10	81.2286	G3V0E8	Poly(RC) binding protein 2, isoform CRA_f OS=Homo sapiens GN=PCBP2 PE=4 SV=1 - [G3V0E8_HUMAN]	19.1516	26.73	5	5	33.4753	P08779	Keratin, type I cytoskeletal 16 OS=Homo sapiens GN=KRT16 PE=1 SV=4 - [K1C16_HUMAN]	26.898	16.91	1	9	51.2362	B4E1R7	cDNA FLJ58224, highly similar to Calpain-2 catalytic subunit (EC 3.4.22.53) OS=Homo sapiens PE=2 SV=1 - [B4E1R7_HUMAN]	23.7405	15.3	7	9	60.4691	O00425	Insulin-like growth factor 2 mRNA-binding protein 3 OS=Homo sapiens GN=IGF2BP3 PE=1 SV=2 - [IF2B3_HUMAN]	41.6837	16.06	1	7	63.6656	F8W7C6	60S ribosomal protein L10 OS=Homo sapiens GN=RPL10 PE=2 SV=1 - [F8W7C6_HUMAN]	22.5378	28.22	5	5	18.5797	Q00610
Q8NA80	cDNA FLJ35762 fis, clone TESTI2004793, moderately similar to Homo sapiens NY-REN-2 antigen mRNA OS=Homo sapiens PE=2 SV=1 - [Q8NA80_HUMAN]	21.5728	19.29	3	8	58.2732	Q9UBB4	Ataxin-10 OS=Homo sapiens GN=ATXN10 PE=1 SV=1 - [ATX10_HUMAN]	25.7239	20.63	8	8	53.4548	B4DRA5	cDNA FLJ61346, highly similar to Protein transport protein Sec23B OS=Homo sapiens PE=2 SV=1 - [B4DRA5_HUMAN]	19.05	8.09	3	2	83.7562	Q9Y490	Talin-1 OS=Homo sapiens GN=TLN1 PE=1 SV=3 - [TLN1_HUMAN]	26.7865	4.96	1	10	269.599	B4DZI8	Coatomer protein complex, subunit beta 2 (Beta prime), isoform CRA_b OS=Homo sapiens GN=COPB2 PE=2 SV=1 - [B4DZI8_HUMAN]	23.7165	12.09	8	10	98.9836	A8K2X8	cDNA FLJ78433, highly similar to Homo sapiens chaperonin containing TCP1, subunit 5 (epsilon) (CCT5), mRNA OS=Homo sapiens PE=2 SV=1 - [A8K2X8_HUMAN]	41.3057	23.66	2	14	59.6918	E9PK47	Phosphorylase OS=Homo sapiens GN=PYGL PE=2 SV=1 - [E9PK47_HUMAN]	22.3092	15.38	5	10	94.0106	B2RDI5
A8K3K1	cDNA FLJ78096, highly similar to Homo sapiens actin, alpha, cardiac muscle (ACTC), mRNA OS=Homo sapiens PE=2 SV=1 - [A8K3K1_HUMAN]	21.3765	27.59	5	9	42.0199	Q9Y6G9	Cytoplasmic dynein 1 light intermediate chain 1 OS=Homo sapiens GN=DYNC1LI1 PE=1 SV=3 - [DC1L1_HUMAN]	25.6293	21.8	7	8	56.544	B3KM89	cDNA FLJ10528 fis, clone NT2RP2000943, highly similar to Protein transport protein Sec24D OS=Homo sapiens PE=2 SV=1 - [B3KM89_HUMAN]	18.9514	10.04	3	5	100.183	P62277	40S ribosomal protein S13 OS=Homo sapiens GN=RPS13 PE=1 SV=2 - [RS13_HUMAN]	26.6387	49.67	1	8	17.2117	H0YA55	Serum albumin (Fragment) OS=Homo sapiens GN=ALB PE=4 SV=1 - [H0YA55_HUMAN]	23.7047	9.03	12	5	51.5358	Q06830	Peroxiredoxin-1 OS=Homo sapiens GN=PRDX1 PE=1 SV=1 - [PRDX1_HUMAN]	41.0781	41.71	2	9	22.0963	P51149	Ras-related protein Rab-7a OS=Homo sapiens GN=RAB7A PE=1 SV=1 - [RAB7A_HUMAN]	22.2454	37.2	7	6	23.4748	F8VXY0
Q96EP5-2	Isoform 2 of DAZ-associated protein 1 OS=Homo sapiens GN=DAZAP1 - [DAZP1_HUMAN]	21.2743	19.31	2	5	40.5038	Q27J81-2	Isoform 2 of Inverted formin-2 OS=Homo sapiens GN=INF2 - [INF2_HUMAN]	25.4579	8.15	4	7	134.533	A8K6V3	cDNA FLJ78677, highly similar to Homo sapiens splicing factor 3b, subunit 3, 130kDa (SF3B3), mRNA OS=Homo sapiens PE=2 SV=1 - [A8K6V3_HUMAN]	18.6128	6.82	2	6	135.493	Q86XU5	MYH9 protein (Fragment) OS=Homo sapiens GN=MYH9 PE=2 SV=1 - [Q86XU5_HUMAN]	26.4929	7.5	2	8	158.653	B1ANR0	Poly(A) binding protein, cytoplasmic 4 (Inducible form), isoform CRA_e OS=Homo sapiens GN=PABPC4 PE=4 SV=1 - [B1ANR0_HUMAN]	23.5025	16.75	13	9	67.9279	A8K3W4	cDNA FLJ75163, highly similar to Homo sapiens heterogeneous nuclear ribonucleoprotein U-like 1 (HNRPUL1), transcript variant 4, mRNA OS=Homo sapiens PE=2 SV=1 - [A8K3W4_HUMAN]	40.6207	17.72	13	12	84.7691	P06733	Alpha-enolase OS=Homo sapiens GN=ENO1 PE=1 SV=2 - [ENOA_HUMAN]	22.2119	22.81	7	7	47.1393	J3QT28
B4DZF6	cDNA FLJ54206, highly similar to Ubiquilin-4 OS=Homo sapiens PE=2 SV=1 - [B4DZF6_HUMAN]	20.803	13.77	3	6	62.1456	P67809	Nuclease-sensitive element-binding protein 1 OS=Homo sapiens GN=YBX1 PE=1 SV=3 - [YBOX1_HUMAN]	25.3805	21.3	16	4	35.9027	Q86TY5	Full-length cDNA clone CS0DI041YE05 of Placenta of Homo sapiens (human) OS=Homo sapiens PE=2 SV=1 - [Q86TY5_HUMAN]	18.4524	43.8	4	4	13.8882	Q05CK9	SYNCRIP protein (Fragment) OS=Homo sapiens GN=SYNCRIP PE=2 SV=1 - [Q05CK9_HUMAN]	25.9792	21.19	7	8	50.6189	B4DSM6	cDNA FLJ54057, highly similar to Neutral alpha-glucosidase AB OS=Homo sapiens PE=2 SV=1 - [B4DSM6_HUMAN]	23.467	11.33	7	7	96.2249	P63104	14-3-3 protein zeta/delta OS=Homo sapiens GN=YWHAZ PE=1 SV=1 - [1433Z_HUMAN]	40.6034	33.06	16	8	27.7277	Q8WWM7	Ataxin-2-like protein OS=Homo sapiens GN=ATXN2L PE=1 SV=2 - [ATX2L_HUMAN]	22.1624	11.07	5	9	113.304	G3V0E8
P61289	Proteasome activator complex subunit 3 OS=Homo sapiens GN=PSME3 PE=1 SV=1 - [PSME3_HUMAN]	20.5378	25.98	2	5	29.4876	P62847-2	Isoform 2 of 40S ribosomal protein S24 OS=Homo sapiens GN=RPS24 - [RS24_HUMAN]	25.3469	30	5	4	15.0592	P62277	40S ribosomal protein S13 OS=Homo sapiens GN=RPS13 PE=1 SV=2 - [RS13_HUMAN]	18.3702	37.75	1	6	17.2117	P53621	Coatomer subunit alpha OS=Homo sapiens GN=COPA PE=1 SV=2 - [COPA_HUMAN]	25.8858	10.95	2	12	138.258	Q92900	Regulator of nonsense transcripts 1 OS=Homo sapiens GN=UPF1 PE=1 SV=2 - [RENT1_HUMAN]	23.1167	8.59	2	7	124.267	B2R8R5	cDNA, FLJ94025, highly similar to Homo sapiens tripartite motif-containing 28 (TRIM28), mRNA OS=Homo sapiens PE=2 SV=1 - [B2R8R5_HUMAN]	40.5091	14.61	5	11	88.5034	Q15365	Poly(rC)-binding protein 1 OS=Homo sapiens GN=PCBP1 PE=1 SV=2 - [PCBP1_HUMAN]	22.056	30.06	1	9	37.4739	P18206
Q15365	Poly(rC)-binding protein 1 OS=Homo sapiens GN=PCBP1 PE=1 SV=2 - [PCBP1_HUMAN]	20.3479	25.56	1	8	37.4739	P61289	Proteasome activator complex subunit 3 OS=Homo sapiens GN=PSME3 PE=1 SV=1 - [PSME3_HUMAN]	25.2428	21.65	5	5	29.4876	Q9Y678	Coatomer subunit gamma OS=Homo sapiens GN=COPG PE=1 SV=1 - [COPG_HUMAN]	18.3577	7.78	2	5	97.6555	O43175	D-3-phosphoglycerate dehydrogenase OS=Homo sapiens GN=PHGDH PE=1 SV=4 - [SERA_HUMAN]	25.8792	17.45	1	8	56.6144	M0R0F0	40S ribosomal protein S5 (Fragment) OS=Homo sapiens GN=RPS5 PE=3 SV=1 - [M0R0F0_HUMAN]	22.8662	27.5	6	6	22.3768	P18206	Vinculin OS=Homo sapiens GN=VCL PE=1 SV=4 - [VINC_HUMAN]	40.3807	12.43	5	12	123.722	B4E266	cDNA FLJ58466, highly similar to Leucyl-tRNA synthetase, cytoplasmic (EC 6.1.1.4) OS=Homo sapiens PE=2 SV=1 - [B4E266_HUMAN]	21.9492	8.94	8	8	129.105	J3QQT2
P08107	Heat shock 70 kDa protein 1A/1B OS=Homo sapiens GN=HSPA1A PE=1 SV=5 - [HSP71_HUMAN]	20.1953	13.88	3	7	70.009	O43175	D-3-phosphoglycerate dehydrogenase OS=Homo sapiens GN=PHGDH PE=1 SV=4 - [SERA_HUMAN]	25.1734	18.01	11	8	56.6144	Q9BTQ7	Similar to ribosomal protein L23 (Fragment) OS=Homo sapiens PE=1 SV=1 - [Q9BTQ7_HUMAN]	18.3408	45.52	2	5	14.1407	Q92973-2	Isoform 2 of Transportin-1 OS=Homo sapiens GN=TNPO1 - [TNPO1_HUMAN]	25.7779	12.92	2	10	101.244	P52272	Heterogeneous nuclear ribonucleoprotein M OS=Homo sapiens GN=HNRNPM PE=1 SV=3 - [HNRPM_HUMAN]	22.784	19.45	12	11	77.4643	A1JUI8	Chaperonin subunit 6A (Fragment) OS=Homo sapiens GN=CCT6A PE=2 SV=1 - [A1JUI8_HUMAN]	40.0764	25.2	9	12	53.6472	B5BUB1	RuvB-like 1 (Fragment) OS=Homo sapiens GN=RUVBL1 PE=2 SV=1 - [B5BUB1_HUMAN]	21.9139	22.59	7	8	50.1843	M0R210
B2R842	cDNA, FLJ93731, highly similar to Homo sapiens snail homolog 1 (Drosophila) (SNAI1), mRNA OS=Homo sapiens PE=2 SV=1 - [B2R842_HUMAN]	19.9727	19.32	2	4	29.0805	B1ANR0	Poly(A) binding protein, cytoplasmic 4 (Inducible form) OS=Homo sapiens GN=PABPC4 PE=4 SV=1 - [B1ANR0_HUMAN]	24.9466	14.31	17	7	67.9279	B2R4M6	cDNA, FLJ92148, highly similar to Homo sapiens S100 calcium binding protein A9 (calgranulin B) (S100A9), mRNA OS=Homo sapiens PE=4 SV=1 - [B2R4M6_HUMAN]	18.1433	49.12	2	4	13.2015	P27824	Calnexin OS=Homo sapiens GN=CANX PE=1 SV=2 - [CALX_HUMAN]	25.6938	10.64	2	6	67.5259	Q92945	Far upstream element-binding protein 2 OS=Homo sapiens GN=KHSRP PE=1 SV=4 - [FUBP2_HUMAN]	22.7067	11.81	5	7	73.07	P55327	Tumor protein D52 OS=Homo sapiens GN=TPD52 PE=1 SV=2 - [TPD52_HUMAN]	39.8479	27.68	9	5	24.3122	Q00610	Clathrin heavy chain 1 OS=Homo sapiens GN=CLTC PE=1 SV=5 - [CLH1_HUMAN]	21.7694	6.03	4	9	191.493	P17987
Q92615	La-related protein 4B OS=Homo sapiens GN=LARP4B PE=1 SV=3 - [LAR4B_HUMAN]	19.7452	10.84	1	6	80.5026	Q15637-4	Isoform 4 of Splicing factor 1 OS=Homo sapiens GN=SF1 - [SF01_HUMAN]	24.5523	15.88	14	7	59.6739	O95373	Importin-7 OS=Homo sapiens GN=IPO7 PE=1 SV=1 - [IPO7_HUMAN]	18.141	6.84	1	5	119.44	Q8WUF5	RelA-associated inhibitor OS=Homo sapiens GN=PPP1R13L PE=1 SV=4 - [IASPP_HUMAN]	25.3355	11.47	1	8	89.0357	Q15365	Poly(rC)-binding protein 1 OS=Homo sapiens GN=PCBP1 PE=1 SV=2 - [PCBP1_HUMAN]	22.7054	25.56	1	7	37.4739	P26373	60S ribosomal protein L13 OS=Homo sapiens GN=RPL13 PE=1 SV=4 - [RL13_HUMAN]	39.8298	34.6	6	9	24.2465	P07195	L-lactate dehydrogenase B chain OS=Homo sapiens GN=LDHB PE=1 SV=2 - [LDHB_HUMAN]	21.6856	23.65	4	7	36.6151	A8K3W4
B4DRA5	cDNA FLJ61346, highly similar to Protein transport protein Sec23B OS=Homo sapiens PE=2 SV=1 - [B4DRA5_HUMAN]	19.7176	9.16	3	6	83.7562	P43243	Matrin-3 OS=Homo sapiens GN=MATR3 PE=1 SV=2 - [MATR3_HUMAN]	24.4478	12.28	19	8	94.5648	Q15365	Poly(rC)-binding protein 1 OS=Homo sapiens GN=PCBP1 PE=1 SV=2 - [PCBP1_HUMAN]	17.9929	18.54	1	4	37.4739	Q5JR95	Ribosomal protein S8 OS=Homo sapiens GN=RPS8 PE=4 SV=1 - [Q5JR95_HUMAN]	25.2467	36.17	2	6	21.866	P12956	X-ray repair cross-complementing protein 6 OS=Homo sapiens GN=XRCC6 PE=1 SV=2 - [XRCC6_HUMAN]	22.5206	16.58	8	8	69.7991	P48444	Coatomer subunit delta OS=Homo sapiens GN=ARCN1 PE=1 SV=1 - [COPD_HUMAN]	39.591	23.09	5	11	57.1741	B4E1R7	cDNA FLJ58224, highly similar to Calpain-2 catalytic subunit (EC 3.4.22.53) OS=Homo sapiens PE=2 SV=1 - [B4E1R7_HUMAN]	21.5722	15.49	7	9	60.4691	B1AHC9
P60953	Cell division control protein 42 homolog OS=Homo sapiens GN=CDC42 PE=1 SV=2 - [CDC42_HUMAN]	19.199	14.14	5	2	21.245	Q92945-2	Isoform 2 of Far upstream element-binding protein 2 OS=Homo sapiens GN=KHSRP - [FUBP2_HUMAN]	24.4466	12.96	4	8	72.8513	B4E1R7	cDNA FLJ58224, highly similar to Calpain-2 catalytic subunit (EC 3.4.22.53) OS=Homo sapiens PE=2 SV=1 - [B4E1R7_HUMAN]	17.6663	14.91	2	6	60.4691	P18206-2	Isoform 1 of Vinculin OS=Homo sapiens GN=VCL - [VINC_HUMAN]	25.1215	12.48	2	12	116.649	P62249	40S ribosomal protein S16 OS=Homo sapiens GN=RPS16 PE=1 SV=2 - [RS16_HUMAN]	22.5073	43.84	6	7	16.435	P0CW22	40S ribosomal protein S17-like OS=Homo sapiens GN=RPS17L PE=2 SV=1 - [RS17L_HUMAN]	39.5601	29.63	5	6	15.5404	B4DLW8	Probable ATP-dependent RNA helicase DDX5 OS=Homo sapiens GN=DDX5 PE=2 SV=1 - [B4DLW8_HUMAN]	21.455	17.57	11	9	60.5254	G5E9S1
P54136	Arginine--tRNA ligase, cytoplasmic OS=Homo sapiens GN=RARS PE=1 SV=2 - [SYRC_HUMAN]	19.0181	14.7	1	8	75.3309	P22314	Ubiquitin-like modifier-activating enzyme 1 OS=Homo sapiens GN=UBA1 PE=1 SV=3 - [UBA1_HUMAN]	24.33	8.98	11	7	117.774	B4E3Q9	cDNA FLJ59659, highly similar to Vinculin OS=Homo sapiens PE=2 SV=1 - [B4E3Q9_HUMAN]	17.4501	9.49	6	7	100.875	Q2TAM5	RELA protein OS=Homo sapiens GN=RELA PE=2 SV=1 - [Q2TAM5_HUMAN]	24.8972	27.06	6	8	42.8416	E9PCY7	Heterogeneous nuclear ribonucleoprotein H OS=Homo sapiens GN=HNRNPH1 PE=2 SV=1 - [E9PCY7_HUMAN]	22.2336	18.41	22	7	47.0574	G5E9S1	Eukaryotic translation initiation factor 4 gamma 1 OS=Homo sapiens GN=EIF4G1 PE=4 SV=1 - [G5E9S1_HUMAN]	39.4486	9.12	17	11	154.837	P46781	40S ribosomal protein S9 OS=Homo sapiens GN=RPS9 PE=1 SV=3 - [RS9_HUMAN]	21.259	30.41	5	9	22.5776	B4DRT3
B7Z243	cDNA FLJ50480, highly similar to T-complex protein 1 subunit beta OS=Homo sapiens PE=2 SV=1 - [B7Z243_HUMAN]	18.939	16.8	6	6	52.6725	Q5JR95	Ribosomal protein S8 OS=Homo sapiens GN=RPS8 PE=4 SV=1 - [Q5JR95_HUMAN]	24.2678	37.77	3	6	21.866	B4DY09	cDNA FLJ51660, highly similar to Interleukin enhancer-binding factor 2 OS=Homo sapiens PE=2 SV=1 - [B4DY09_HUMAN]	17.4044	22.44	3	6	38.8862	P07384	Calpain-1 catalytic subunit OS=Homo sapiens GN=CAPN1 PE=1 SV=1 - [CAN1_HUMAN]	24.8957	14.01	2	10	81.8382	F5GWF6	T-complex protein 1 subunit beta OS=Homo sapiens GN=CCT2 PE=2 SV=2 - [F5GWF6_HUMAN]	22.1954	20.57	5	9	56.7708	Q5H909	Melanoma-associated antigen D2 OS=Homo sapiens GN=MAGED2 PE=2 SV=1 - [Q5H909_HUMAN]	39.2874	15.64	19	9	59.4888	A6NN80	Annexin OS=Homo sapiens GN=ANXA6 PE=3 SV=3 - [A6NN80_HUMAN]	21.2574	15.59	9	9	75.2292	O75533
Q9BTQ7	Similar to ribosomal protein L23 (Fragment) OS=Homo sapiens PE=1 SV=1 - [Q9BTQ7_HUMAN]	18.8284	32.09	4	3	14.1407	Q15365	Poly(rC)-binding protein 1 OS=Homo sapiens GN=PCBP1 PE=1 SV=2 - [PCBP1_HUMAN]	24.1692	30.06	2	9	37.4739	B7ZL34	PUM2 protein OS=Homo sapiens GN=PUM2 PE=2 SV=1 - [B7ZL34_HUMAN]	17.3991	7.41	3	4	105.937	Q9Y5A9-2	Isoform 2 of YTH domain family protein 2 OS=Homo sapiens GN=YTHDF2 - [YTHD2_HUMAN]	24.6445	15.12	4	7	56.8421	Q8J015	Ribosomal protein L13a OS=Homo sapiens GN=RPL13a PE=2 SV=1 - [Q8J015_HUMAN]	22.0889	23.24	8	5	16.7204	B4E1R7	cDNA FLJ58224, highly similar to Calpain-2 catalytic subunit (EC 3.4.22.53) OS=Homo sapiens PE=2 SV=1 - [B4E1R7_HUMAN]	38.9844	22.18	6	12	60.4691	J3QQT2	60S ribosomal protein L17 (Fragment) OS=Homo sapiens GN=RPL17 PE=3 SV=1 - [J3QQT2_HUMAN]	21.253	35.09	7	6	19.7734	Q5H909
P07737	Profilin-1 OS=Homo sapiens GN=PFN1 PE=1 SV=2 - [PROF1_HUMAN]	18.6838	45.71	1	5	15.0446	E9PCY7	Heterogeneous nuclear ribonucleoprotein H1 (H) OS=Homo sapiens GN=HNRNPH1 PE=4 SV=1 - [E9PCY7_HUMAN]	24.0809	16.08	29	5	47.0574	P43243	Matrin-3 OS=Homo sapiens GN=MATR3 PE=1 SV=2 - [MATR3_HUMAN]	17.3537	10.04	2	6	94.5648	B4DRA5	cDNA FLJ61346, highly similar to Protein transport protein Sec23B OS=Homo sapiens PE=2 SV=1 - [B4DRA5_HUMAN]	24.6367	11.32	3	7	83.7562	P39023	60S ribosomal protein L3 OS=Homo sapiens GN=RPL3 PE=1 SV=2 - [RL3_HUMAN]	21.7948	21.59	13	8	46.0798	Q96I24	Far upstream element-binding protein 3 OS=Homo sapiens GN=FUBP3 PE=1 SV=2 - [FUBP3_HUMAN]	38.8433	17.13	1	10	61.6022	O43707	Alpha-actinin-4 OS=Homo sapiens GN=ACTN4 PE=1 SV=2 - [ACTN4_HUMAN]	21.0316	11.53	29	8	104.788	Q2TAM5
E7EWI9	Heterogeneous nuclear ribonucleoprotein A3 OS=Homo sapiens GN=HNRNPA3 PE=4 SV=1 - [E7EWI9_HUMAN]	18.6771	26.09	5	7	34.081	P09651-3	Isoform 2 of Heterogeneous nuclear ribonucleoprotein A1 OS=Homo sapiens GN=HNRNPA1 - [ROA1_HUMAN]	23.2636	31.46	20	7	29.3682	B4DWN1	Uncharacterized protein OS=Homo sapiens GN=LMAN2 PE=2 SV=1 - [B4DWN1_HUMAN]	17.0346	23.51	3	6	32.5571	Q9Y266	Nuclear migration protein nudC OS=Homo sapiens GN=NUDC PE=1 SV=1 - [NUDC_HUMAN]	24.4388	28.4	1	9	38.2191	P27824	Calnexin OS=Homo sapiens GN=CANX PE=1 SV=2 - [CALX_HUMAN]	21.6052	14.36	11	7	67.5259	P55795	Heterogeneous nuclear ribonucleoprotein H2 OS=Homo sapiens GN=HNRNPH2 PE=1 SV=1 - [HNRH2_HUMAN]	38.6956	16.7	7	6	49.2323	Q9NTZ6	RNA-binding protein 12 OS=Homo sapiens GN=RBM12 PE=1 SV=1 - [RBM12_HUMAN]	21.0247	13.09	4	9	97.3334	P53621
P62241	40S ribosomal protein S8 OS=Homo sapiens GN=RPS8 PE=1 SV=2 - [RS8_HUMAN]	18.5807	32.21	1	5	24.1902	Q2TAM5	RELA protein OS=Homo sapiens GN=RELA PE=2 SV=1 - [Q2TAM5_HUMAN]	23.08	28.91	20	8	42.8416	P63244	Guanine nucleotide-binding protein subunit beta-2-like 1 OS=Homo sapiens GN=GNB2L1 PE=1 SV=3 - [GBLP_HUMAN]	16.9762	23.03	1	6	35.0546	Q96I24	Far upstream element-binding protein 3 OS=Homo sapiens GN=FUBP3 PE=1 SV=2 - [FUBP3_HUMAN]	24.1706	18.71	1	10	61.6022	Q92841	Probable ATP-dependent RNA helicase DDX17 OS=Homo sapiens GN=DDX17 PE=1 SV=2 - [DDX17_HUMAN]	21.5825	12.21	5	8	80.222	B4E266	cDNA FLJ58466, highly similar to Leucyl-tRNA synthetase, cytoplasmic (EC 6.1.1.4) OS=Homo sapiens PE=2 SV=1 - [B4E266_HUMAN]	38.3267	9.56	14	9	129.105	H0YEN5	40S ribosomal protein S2 (Fragment) OS=Homo sapiens GN=RPS2 PE=2 SV=1 - [H0YEN5_HUMAN]	20.9378	30.77	12	6	21.1404	D3YTB1
B1P2N8	Numb isoform 8 OS=Homo sapiens GN=NUMB PE=2 SV=1 - [B1P2N8_HUMAN]	18.5444	11.46	8	4	48.7944	A6NHL2-2	Isoform 2 of Tubulin alpha chain-like 3 OS=Homo sapiens GN=TUBAL3 - [TBAL3_HUMAN]	23.0058	11.33	2	5	45.4886	Q5H909	Melanoma antigen family D, 2 OS=Homo sapiens GN=MAGED2 PE=2 SV=1 - [Q5H909_HUMAN]	16.9665	13.27	3	6	59.4888	P55072	Transitional endoplasmic reticulum ATPase OS=Homo sapiens GN=VCP PE=1 SV=4 - [TERA_HUMAN]	24.165	12.03	1	8	89.2657	P50990	T-complex protein 1 subunit theta OS=Homo sapiens GN=CCT8 PE=1 SV=4 - [TCPQ_HUMAN]	21.4997	16.24	6	8	59.5825	Q6P2E9	Enhancer of mRNA-decapping protein 4 OS=Homo sapiens GN=EDC4 PE=1 SV=1 - [EDC4_HUMAN]	38.1569	7.92	3	9	151.567	B4DFK9	cDNA FLJ57964, highly similar to Heterogeneous nuclear ribonucleoprotein H' OS=Homo sapiens PE=2 SV=1 - [B4DFK9_HUMAN]	20.8491	14.6	7	5	44.4088	P55795
E9M4D4	Hemoglobin alpha-1 globin chain (Fragment) OS=Homo sapiens GN=HBA1 PE=3 SV=1 - [E9M4D4_HUMAN]	18.5214	49	2	4	10.7765	Q92973-2	Isoform 2 of Transportin-1 OS=Homo sapiens GN=TNPO1 - [TNPO1_HUMAN]	22.9307	10.67	14	8	101.244	O43684-2	Isoform 2 of Mitotic checkpoint protein BUB3 OS=Homo sapiens GN=BUB3 - [BUB3_HUMAN]	16.962	20.55	2	6	36.9311	P02545	Prelamin-A/C OS=Homo sapiens GN=LMNA PE=1 SV=1 - [LMNA_HUMAN]	23.8852	17.62	2	10	74.0947	K9J957	REG gamma-3 variant OS=Homo sapiens PE=2 SV=1 - [K9J957_HUMAN]	21.4047	22.94	7	4	26.8502	Q9Y678	Coatomer subunit gamma-1 OS=Homo sapiens GN=COPG1 PE=1 SV=1 - [COPG1_HUMAN]	38.0135	16.36	4	13	97.6555	B7Z2T5	cDNA FLJ55427, highly similar to Sodium/potassium-transporting ATPase alpha-1 chain (EC 3.6.3.9) OS=Homo sapiens PE=2 SV=1 - [B7Z2T5_HUMAN]	20.7951	11.24	31	9	112.836	O14776
O00410-2	Isoform 2 of Importin-5 OS=Homo sapiens GN=IPO5 - [IPO5_HUMAN]	18.3831	8.1	4	6	116.906	P49588	Alanine--tRNA ligase, cytoplasmic OS=Homo sapiens GN=AARS PE=1 SV=2 - [SYAC_HUMAN]	22.423	11.78	3	9	106.743	Q92615	La-related protein 4B OS=Homo sapiens GN=LARP4B PE=1 SV=3 - [LAR4B_HUMAN]	16.9388	10.7	1	6	80.5026	Q02790	Peptidyl-prolyl cis-trans isomerase FKBP4 OS=Homo sapiens GN=FKBP4 PE=1 SV=3 - [FKBP4_HUMAN]	23.8248	18.52	1	7	51.7721	Q9UBB4	Ataxin-10 OS=Homo sapiens GN=ATXN10 PE=1 SV=1 - [ATX10_HUMAN]	21.3058	19.37	3	7	53.4548	A8K3Q9	cDNA FLJ76611, highly similar to Homo sapiens ribosomal protein L14 (RPL14), mRNA OS=Homo sapiens PE=2 SV=1 - [A8K3Q9_HUMAN]	37.9841	25	1	5	23.44	Q9UBB4	Ataxin-10 OS=Homo sapiens GN=ATXN10 PE=1 SV=1 - [ATX10_HUMAN]	20.7171	18.11	3	6	53.4548	P27824
B3KQH1	cDNA FLJ90452 fis, clone NT2RP3001475, highly similar to Splicing factor 3B subunit 3 OS=Homo sapiens PE=2 SV=1 - [B3KQH1_HUMAN]	18.2981	9.36	3	6	99.8586	Q5T6F2	Ubiquitin-associated protein 2 OS=Homo sapiens GN=UBAP2 PE=1 SV=1 - [UBAP2_HUMAN]	22.1021	7.69	19	6	117.044	A8K2X8	cDNA FLJ78433, highly similar to Homo sapiens chaperonin containing TCP1, subunit 5 (epsilon) (CCT5), mRNA OS=Homo sapiens PE=2 SV=1 - [A8K2X8_HUMAN]	16.757	14.23	1	6	59.6918	Q8NA80	cDNA FLJ35762 fis, clone TESTI2004793, moderately similar to Homo sapiens NY-REN-2 antigen mRNA OS=Homo sapiens PE=2 SV=1 - [Q8NA80_HUMAN]	23.7545	16.1	3	7	58.2732	Q9Y230	RuvB-like 2 OS=Homo sapiens GN=RUVBL2 PE=1 SV=3 - [RUVB2_HUMAN]	21.239	22.68	6	8	51.1246	P62195	26S protease regulatory subunit 8 OS=Homo sapiens GN=PSMC5 PE=1 SV=1 - [PRS8_HUMAN]	37.3554	29.56	9	10	45.5971	P07814	Bifunctional glutamate/proline--tRNA ligase OS=Homo sapiens GN=EPRS PE=1 SV=5 - [SYEP_HUMAN]	20.7102	7.34	5	9	170.483	Q01813
Q14677	Clathrin interactor 1 OS=Homo sapiens GN=CLINT1 PE=1 SV=1 - [EPN4_HUMAN]	18.2439	9.28	2	4	68.2158	Q9Y5A9-2	Isoform 2 of YTH domain family protein 2 OS=Homo sapiens GN=YTHDF2 - [YTHD2_HUMAN]	22.0349	15.5	4	7	56.8421	P37802	Transgelin-2 OS=Homo sapiens GN=TAGLN2 PE=1 SV=3 - [TAGL2_HUMAN]	16.6482	30.65	1	5	22.3772	B4DM74	Uncharacterized protein OS=Homo sapiens GN=RPL18A PE=2 SV=1 - [B4DM74_HUMAN]	23.6409	44.81	2	7	18.0984	H0Y4R1	Inosine-5'-monophosphate dehydrogenase 2 (Fragment) OS=Homo sapiens GN=IMPDH2 PE=3 SV=1 - [H0Y4R1_HUMAN]	21.1414	15.32	5	6	51.0352	Q02413	Desmoglein-1 OS=Homo sapiens GN=DSG1 PE=1 SV=2 - [DSG1_HUMAN]	37.2599	10.2	1	8	113.676	P02533	Keratin, type I cytoskeletal 14 OS=Homo sapiens GN=KRT14 PE=1 SV=4 - [K1C14_HUMAN]	20.6776	15.25	9	7	51.5294	P62979
P52594-2	Isoform 2 of Arf-GAP domain and FG repeat-containing protein 1 OS=Homo sapiens GN=AGFG1 - [AGFG1_HUMAN]	18.2248	13.79	6	6	54.1484	Q02790	Peptidyl-prolyl cis-trans isomerase FKBP4 OS=Homo sapiens GN=FKBP4 PE=1 SV=3 - [FKBP4_HUMAN]	21.9411	16.99	4	6	51.7721	B4E022	Uncharacterized protein OS=Homo sapiens GN=TKT PE=2 SV=1 - [B4E022_HUMAN]	16.6038	14.41	5	6	62.8393	Q1KMD3	Heterogeneous nuclear ribonucleoprotein U-like protein 2 OS=Homo sapiens GN=HNRNPUL2 PE=1 SV=1 - [HNRL2_HUMAN]	23.5623	12.18	1	7	85.0522	E7ETK0	40S ribosomal protein S24 OS=Homo sapiens GN=RPS24 PE=2 SV=1 - [E7ETK0_HUMAN]	21.0621	29.77	2	4	15.1873	Q27J81	Inverted formin-2 OS=Homo sapiens GN=INF2 PE=1 SV=2 - [INF2_HUMAN]	37.1418	9.53	2	10	135.54	B3KN05	cDNA FLJ13129 fis, clone NT2RP3002969, highly similar to Long-chain-fatty-acid--CoA ligase 3 (EC 6.2.1.3) OS=Homo sapiens PE=2 SV=1 - [B3KN05_HUMAN]	20.6713	12.55	7	7	79.1717	A0PJ62
P62805	Histone H4 OS=Homo sapiens GN=HIST1H4A PE=1 SV=2 - [H4_HUMAN]	18.186	41.75	1	5	11.3604	P30050	60S ribosomal protein L12 OS=Homo sapiens GN=RPL12 PE=1 SV=1 - [RL12_HUMAN]	21.9108	43.03	4	5	17.8075	P54136-2	Isoform Monomeric of Arginine--tRNA ligase, cytoplasmic OS=Homo sapiens GN=RARS - [SYRC_HUMAN]	16.4102	12.76	2	6	67.0975	B4DT77	Annexin A7 OS=Homo sapiens GN=ANXA7 PE=2 SV=1 - [B4DT77_HUMAN]	23.5213	31.85	7	9	37.7809	A8MUD9	60S ribosomal protein L7 OS=Homo sapiens GN=RPL7 PE=3 SV=1 - [A8MUD9_HUMAN]	21.0334	27.88	5	8	24.4174	O43707	Alpha-actinin-4 OS=Homo sapiens GN=ACTN4 PE=1 SV=2 - [ACTN4_HUMAN]	36.8974	11.31	7	8	104.788	B4E091	cDNA FLJ55438, highly similar to Splicing factor 3 subunit 1 OS=Homo sapiens PE=2 SV=1 - [B4E091_HUMAN]	20.559	13.48	3	8	77.3577	B1ANR0
Q9UDY4	DnaJ homolog subfamily B member 4 OS=Homo sapiens GN=DNAJB4 PE=1 SV=1 - [DNJB4_HUMAN]	18.156	20.77	2	5	37.7831	P62263	40S ribosomal protein S14 OS=Homo sapiens GN=RPS14 PE=1 SV=3 - [RS14_HUMAN]	21.8229	34.44	4	4	16.2625	Q6FIG4	RAB1B protein OS=Homo sapiens GN=RAB1B PE=2 SV=1 - [Q6FIG4_HUMAN]	16.3521	34.83	2	3	22.1842	P62906	60S ribosomal protein L10a OS=Homo sapiens GN=RPL10A PE=1 SV=2 - [RL10A_HUMAN]	23.48	29.95	1	6	24.8155	P62195	26S protease regulatory subunit 8 OS=Homo sapiens GN=PSMC5 PE=1 SV=1 - [PRS8_HUMAN]	21.0102	26.11	9	8	45.5971	P35998	26S protease regulatory subunit 7 OS=Homo sapiens GN=PSMC2 PE=1 SV=3 - [PRS7_HUMAN]	36.8359	25.17	5	9	48.6031	Q9Y285	Phenylalanine--tRNA ligase alpha subunit OS=Homo sapiens GN=FARSA PE=1 SV=3 - [SYFA_HUMAN]	20.301	14.96	6	6	57.5275	P26373
P37802	Transgelin-2 OS=Homo sapiens GN=TAGLN2 PE=1 SV=3 - [TAGL2_HUMAN]	18.1528	38.19	1	7	22.3772	A8K4Z4	cDNA FLJ75549, highly similar to Homo sapiens ribosomal protein, large, P0 (RPLP0), transcript variant 1, mRNA OS=Homo sapiens PE=2 SV=1 - [A8K4Z4_HUMAN]	21.7117	22.71	20	6	34.2178	B7Z3Y3	cDNA FLJ50557, highly similar to Homo sapiens microtubule-associated protein 7 (MAP7), mRNA OS=Homo sapiens PE=2 SV=1 - [B7Z3Y3_HUMAN]	16.1958	10.12	11	5	66.9277	B7Z8A7	cDNA FLJ53686, highly similar to Annexin A6 OS=Homo sapiens PE=2 SV=1 - [B7Z8A7_HUMAN]	23.3968	16.22	4	9	72.3479	P13647	Keratin, type II cytoskeletal 5 OS=Homo sapiens GN=KRT5 PE=1 SV=3 - [K2C5_HUMAN]	20.9999	12.88	7	9	62.34	G3V0E8	Poly(RC) binding protein 2, isoform CRA_f OS=Homo sapiens GN=PCBP2 PE=4 SV=1 - [G3V0E8_HUMAN]	36.8227	29.25	19	8	33.4753	P25705	ATP synthase subunit alpha, mitochondrial OS=Homo sapiens GN=ATP5A1 PE=1 SV=1 - [ATPA_HUMAN]	20.2188	17.72	11	8	59.7136	O00410
P27824	Calnexin OS=Homo sapiens GN=CANX PE=1 SV=2 - [CALX_HUMAN]	17.9507	10.98	2	6	67.5259	P46781	40S ribosomal protein S9 OS=Homo sapiens GN=RPS9 PE=1 SV=3 - [RS9_HUMAN]	21.6435	35.05	7	9	22.5776	P51148	Ras-related protein Rab-5C OS=Homo sapiens GN=RAB5C PE=1 SV=2 - [RAB5C_HUMAN]	16.1854	33.8	2	6	23.4678	P06733	Alpha-enolase OS=Homo sapiens GN=ENO1 PE=1 SV=2 - [ENOA_HUMAN]	23.3124	20.28	1	7	47.1393	A8K3A8	cDNA FLJ75085, highly similar to Homo sapiens glutaminyl-tRNA synthetase (QARS), mRNA OS=Homo sapiens PE=2 SV=1 - [A8K3A8_HUMAN]	20.8067	16.39	14	10	87.7529	P61204	ADP-ribosylation factor 3 OS=Homo sapiens GN=ARF3 PE=1 SV=2 - [ARF3_HUMAN]	36.5727	32.04	9	5	20.5877	P08779	Keratin, type I cytoskeletal 16 OS=Homo sapiens GN=KRT16 PE=1 SV=4 - [K1C16_HUMAN]	20.1502	15.86	9	7	51.2362	B4DZF6
P31350	Ribonucleoside-diphosphate reductase subunit M2 OS=Homo sapiens GN=RRM2 PE=1 SV=1 - [RIR2_HUMAN]	17.811	23.65	2	7	44.8488	E9PR38	Pumilio homolog 1 (Drosophila) OS=Homo sapiens GN=PUM1 PE=4 SV=1 - [E9PR38_HUMAN]	21.629	11.23	25	8	100.437	Q14677	Clathrin interactor 1 OS=Homo sapiens GN=CLINT1 PE=1 SV=1 - [EPN4_HUMAN]	16.1467	8.32	2	4	68.2158	A8K7D9	cDNA FLJ78270, highly similar to Homo sapiens karyopherin alpha 2 (RAG cohort 1, importin alpha 1)(KPNA2), mRNA OS=Homo sapiens PE=2 SV=1 - [A8K7D9_HUMAN]	23.2823	16.64	5	6	57.7979	Q7Z451	AP-2 complex subunit beta OS=Homo sapiens GN=AP2B1 PE=2 SV=1 - [Q7Z451_HUMAN]	20.6158	8.75	15	6	98.0557	A8K7D9	Importin subunit alpha OS=Homo sapiens PE=2 SV=1 - [A8K7D9_HUMAN]	36.3504	17.96	6	7	57.7979	P62249	40S ribosomal protein S16 OS=Homo sapiens GN=RPS16 PE=1 SV=2 - [RS16_HUMAN]	20.1248	43.84	6	7	16.435	Q5T6W5
Q5TCJ4	Lamin A/C OS=Homo sapiens GN=LMNA PE=2 SV=1 - [Q5TCJ4_HUMAN]	17.4674	17.2	10	7	53.2186	P62424	60S ribosomal protein L7a OS=Homo sapiens GN=RPL7A PE=1 SV=2 - [RL7A_HUMAN]	21.6212	24.44	4	6	29.977	P13489	Ribonuclease inhibitor OS=Homo sapiens GN=RNH1 PE=1 SV=2 - [RINI_HUMAN]	16.0235	14.32	1	5	49.9411	Q7Z3U5	Putative uncharacterized protein DKFZp686L0869 OS=Homo sapiens GN=DKFZp686L0869 PE=2 SV=1 - [Q7Z3U5_HUMAN]	23.2537	7.09	3	8	142.228	P62263	40S ribosomal protein S14 OS=Homo sapiens GN=RPS14 PE=1 SV=3 - [RS14_HUMAN]	20.5394	37.09	3	5	16.2625	A8K6Q8	cDNA FLJ75881, highly similar to Homo sapiens transferrin receptor (p90, CD71) (TFRC), mRNA OS=Homo sapiens PE=2 SV=1 - [A8K6Q8_HUMAN]	36.2821	19.21	5	12	84.8199	B3KNI2	cDNA FLJ14650 fis, clone NT2RP2002185, highly similar to Ubiquilin-1 OS=Homo sapiens PE=2 SV=1 - [B3KNI2_HUMAN]	20.0252	9.34	9	4	62.4455	P23284
P62277	40S ribosomal protein S13 OS=Homo sapiens GN=RPS13 PE=1 SV=2 - [RS13_HUMAN]	17.4142	37.75	1	6	17.2117	P46783	40S ribosomal protein S10 OS=Homo sapiens GN=RPS10 PE=1 SV=1 - [RS10_HUMAN]	21.4813	23.64	4	4	18.8859	F8VZY9	Keratin 18 OS=Homo sapiens GN=KRT18 PE=3 SV=1 - [F8VZY9_HUMAN]	15.9901	19.95	3	8	43.7474	B4E1E0	cDNA FLJ58563, highly similar to CTP synthase 1 (EC 6.3.4.2) OS=Homo sapiens PE=2 SV=1 - [B4E1E0_HUMAN]	23.0861	18.85	3	7	49.6632	O14980	Exportin-1 OS=Homo sapiens GN=XPO1 PE=1 SV=1 - [XPO1_HUMAN]	20.3021	10.55	10	10	123.306	B4DR55	cDNA FLJ53168 OS=Homo sapiens PE=2 SV=1 - [B4DR55_HUMAN]	36.2593	16.58	14	11	83.4808	P22314	Ubiquitin-like modifier-activating enzyme 1 OS=Homo sapiens GN=UBA1 PE=1 SV=3 - [UBA1_HUMAN]	19.8927	6.33	5	4	117.774	Q7RTS7
Q05CK9	SYNCRIP protein (Fragment) OS=Homo sapiens GN=SYNCRIP PE=2 SV=1 - [Q05CK9_HUMAN]	17.3664	11.7	7	4	50.6189	P14868	Aspartate--tRNA ligase, cytoplasmic OS=Homo sapiens GN=DARS PE=1 SV=2 - [SYDC_HUMAN]	21.455	21.36	8	9	57.1	F5H2U4	Ubiquitin associated protein 2 OS=Homo sapiens GN=UBAP2 PE=4 SV=1 - [F5H2U4_HUMAN]	15.8763	8.58	6	5	90.2492	B4DM19	cDNA FLJ60127, highly similar to Ubiquilin-2 OS=Homo sapiens PE=2 SV=1 - [B4DM19_HUMAN]	22.9036	14.55	4	5	52.8877	B4DYY5	cDNA FLJ55671, highly similar to Ubiquitin-associated protein 2-like OS=Homo sapiens PE=2 SV=1 - [B4DYY5_HUMAN]	20.2789	7.7	9	6	113.491	B2RDI5	cDNA, FLJ96627, highly similar to Homo sapiens calpain 1, (mu/I) large subunit (CAPN1), mRNA OS=Homo sapiens PE=2 SV=1 - [B2RDI5_HUMAN]	36.0918	19.75	14	14	81.8451	P14868	Aspartate--tRNA ligase, cytoplasmic OS=Homo sapiens GN=DARS PE=1 SV=2 - [SYDC_HUMAN]	19.8751	19.36	9	8	57.1	P42677
Q92973-2	Isoform 2 of Transportin-1 OS=Homo sapiens GN=TNPO1 - [TNPO1_HUMAN]	17.3386	8.43	2	7	101.244	Q9BVP2-2	Isoform 2 of Guanine nucleotide-binding protein-like 3 OS=Homo sapiens GN=GNL3 - [GNL3_HUMAN]	21.3926	12.85	5	7	60.5025	Q9BWF3	RNA-binding protein 4 OS=Homo sapiens GN=RBM4 PE=1 SV=1 - [RBM4_HUMAN]	15.8636	18.13	1	6	40.2887	P26641	Elongation factor 1-gamma OS=Homo sapiens GN=EEF1G PE=1 SV=3 - [EF1G_HUMAN]	22.846	15.56	2	7	50.0871	P07195	L-lactate dehydrogenase B chain OS=Homo sapiens GN=LDHB PE=1 SV=2 - [LDHB_HUMAN]	20.2685	28.14	4	8	36.6151	Q7RTS7	Keratin, type II cytoskeletal 74 OS=Homo sapiens GN=KRT74 PE=1 SV=2 - [K2C74_HUMAN]	36.0372	5.29	5	4	57.8296	P63104	14-3-3 protein zeta/delta OS=Homo sapiens GN=YWHAZ PE=1 SV=1 - [1433Z_HUMAN]	19.8132	26.53	12	6	27.7277	P62195
P52948-6	Isoform 6 of Nuclear pore complex protein Nup98-Nup96 OS=Homo sapiens GN=NUP98 - [NUP98_HUMAN]	17.2973	3.91	4	5	186.153	Q8WUF5	RelA-associated inhibitor OS=Homo sapiens GN=PPP1R13L PE=1 SV=4 - [IASPP_HUMAN]	21.3448	14.61	5	10	89.0357	E7EUT5	Glyceraldehyde-3-phosphate dehydrogenase OS=Homo sapiens GN=GAPDH PE=3 SV=1 - [E7EUT5_HUMAN]	15.854	27.69	4	5	27.8531	P54136-2	Isoform Monomeric of Arginine--tRNA ligase, cytoplasmic OS=Homo sapiens GN=RARS - [SYRC_HUMAN]	22.6314	18.03	2	9	67.0975	P62820	Ras-related protein Rab-1A OS=Homo sapiens GN=RAB1A PE=1 SV=3 - [RAB1A_HUMAN]	20.2589	36.59	25	6	22.6634	F5H897	Heat shock protein 75 kDa, mitochondrial OS=Homo sapiens GN=TRAP1 PE=2 SV=1 - [F5H897_HUMAN]	36.008	9.98	12	5	74.2207	P53618	Coatomer subunit beta OS=Homo sapiens GN=COPB1 PE=1 SV=3 - [COPB_HUMAN]	19.6899	10.07	4	8	107.074	Q1KMD3
C9JYS8	Non-POU domain containing, octamer-binding (Fragment) OS=Homo sapiens GN=NONO PE=4 SV=1 - [C9JYS8_HUMAN]	17.2807	14.11	5	4	29.603	Q86YM9	Calpastatin (Fragment) OS=Homo sapiens GN=CAST PE=2 SV=1 - [Q86YM9_HUMAN]	21.288	21.61	39	7	47.6846	Q01813	6-phosphofructokinase type C OS=Homo sapiens GN=PFKP PE=1 SV=2 - [K6PP_HUMAN]	15.8444	9.82	1	4	85.5415	E9PPU1	Ribosomal protein S3 OS=Homo sapiens GN=RPS3 PE=4 SV=1 - [E9PPU1_HUMAN]	22.6222	46.84	2	6	17.3965	P25705	ATP synthase subunit alpha, mitochondrial OS=Homo sapiens GN=ATP5A1 PE=1 SV=1 - [ATPA_HUMAN]	20.2153	16.82	11	7	59.7136	O15357	Phosphatidylinositol 3,4,5-trisphosphate 5-phosphatase 2 OS=Homo sapiens GN=INPPL1 PE=1 SV=2 - [SHIP2_HUMAN]	35.8175	8.9	1	10	138.513	B2RBA6	cDNA, FLJ95407, highly similar to Homo sapiens MCM7 minichromosome maintenance deficient 7 (S. cerevisiae) (MCM7), mRNA OS=Homo sapiens PE=2 SV=1 - [B2RBA6_HUMAN]	19.6512	11.96	6	7	81.2286	Q8NA80
P37198	Nuclear pore glycoprotein p62 OS=Homo sapiens GN=NUP62 PE=1 SV=3 - [NUP62_HUMAN]	17.2501	10.15	1	4	53.2225	B4DRA5	cDNA FLJ61346, highly similar to Protein transport protein Sec23B OS=Homo sapiens PE=2 SV=1 - [B4DRA5_HUMAN]	21.1962	10.11	9	6	83.7562	B7Z243	cDNA FLJ50480, highly similar to T-complex protein 1 subunit beta OS=Homo sapiens PE=2 SV=1 - [B7Z243_HUMAN]	15.843	14.55	6	5	52.6725	Q9BTQ7	Similar to ribosomal protein L23 (Fragment) OS=Homo sapiens PE=1 SV=1 - [Q9BTQ7_HUMAN]	22.6082	39.55	2	4	14.1407	Q9UNF1	Melanoma-associated antigen D2 OS=Homo sapiens GN=MAGED2 PE=1 SV=2 - [MAGD2_HUMAN]	20.1185	16.67	6	10	64.9144	P15880	40S ribosomal protein S2 OS=Homo sapiens GN=RPS2 PE=1 SV=2 - [RS2_HUMAN]	35.7898	22.53	15	6	31.3046	B4DHC4	cDNA FLJ51843, highly similar to 14-3-3 protein gamma OS=Homo sapiens PE=2 SV=1 - [B4DHC4_HUMAN]	19.5305	29.33	7	7	25.6406	B7ZL00
P62263	40S ribosomal protein S14 OS=Homo sapiens GN=RPS14 PE=1 SV=3 - [RS14_HUMAN]	17.2182	34.44	1	4	16.2625	P00338	L-lactate dehydrogenase A chain OS=Homo sapiens GN=LDHA PE=1 SV=2 - [LDHA_HUMAN]	21.1387	15.36	20	4	36.6654	Q15645	Pachytene checkpoint protein 2 homolog OS=Homo sapiens GN=TRIP13 PE=1 SV=2 - [PCH2_HUMAN]	15.7532	17.59	1	6	48.5205	P62269	40S ribosomal protein S18 OS=Homo sapiens GN=RPS18 PE=1 SV=3 - [RS18_HUMAN]	22.5245	42.76	1	7	17.7079	B4DYD8	T-complex protein 1 subunit epsilon OS=Homo sapiens GN=CCT5 PE=2 SV=1 - [B4DYD8_HUMAN]	20.0495	18.08	16	8	49.4948	P39023	60S ribosomal protein L3 OS=Homo sapiens GN=RPL3 PE=1 SV=2 - [RL3_HUMAN]	35.7803	21.34	13	9	46.0798	P31942	Heterogeneous nuclear ribonucleoprotein H3 OS=Homo sapiens GN=HNRNPH3 PE=1 SV=2 - [HNRH3_HUMAN]	19.5234	20.81	3	6	36.9031	P39019
P29361	14-3-3 protein zeta/delta OS=Ovis aries GN=YWHAZ PE=1 SV=1 - [1433Z_SHEEP]	17.1696	25.71	4	6	27.8388	F8W840	YTH domain family, member 1 OS=Homo sapiens GN=YTHDF1 PE=4 SV=1 - [F8W840_HUMAN]	21.1162	14.93	4	6	55.3003	E9PBS1	Phosphoribosylaminoimidazole carboxylase, phosphoribosylaminoimidazole succinocarboxamide synthetase (Fragment) OS=Homo sapiens GN=PAICS PE=4 SV=1 - [E9PBS1_HUMAN]	15.6119	13.32	2	4	45.6224	P30050	60S ribosomal protein L12 OS=Homo sapiens GN=RPL12 PE=1 SV=1 - [RL12_HUMAN]	22.503	33.33	1	4	17.8075	J3QQT2	60S ribosomal protein L17 (Fragment) OS=Homo sapiens GN=RPL17 PE=3 SV=1 - [J3QQT2_HUMAN]	19.895	34.5	7	6	19.7734	Q01813	6-phosphofructokinase type C OS=Homo sapiens GN=PFKP PE=1 SV=2 - [K6PP_HUMAN]	35.6972	13.9	6	9	85.5415	Q92900	Regulator of nonsense transcripts 1 OS=Homo sapiens GN=UPF1 PE=1 SV=2 - [RENT1_HUMAN]	19.505	6.29	2	6	124.267	Q5T6F2
O14979-3	Isoform 3 of Heterogeneous nuclear ribonucleoprotein D-like OS=Homo sapiens GN=HNRPDL - [HNRDL_HUMAN]	17.1083	23.36	4	5	27.1746	Q96I24	Far upstream element-binding protein 3 OS=Homo sapiens GN=FUBP3 PE=1 SV=2 - [FUBP3_HUMAN]	21.0648	15.21	3	7	61.6022	Q92879	cDNA FLJ61559, highly similar to CUG triplet repeat RNA-binding protein 1 OS=Homo sapiens PE=2 SV=1 - [B4E2U5_HUMAN]	15.374	8.76	7	5	50.098	A8K2S1	cDNA FLJ75258, highly similar to Homo sapiens phospholipase A2, group IVA (cytosolic, calcium-dependent) (PLA2G4A), mRNA OS=Homo sapiens PE=2 SV=1 - [A8K2S1_HUMAN]	22.285	12.15	2	7	85.1823	H0YJ34	Fermitin family homolog 2 (Fragment) OS=Homo sapiens GN=FERMT2 PE=2 SV=1 - [H0YJ34_HUMAN]	19.7674	15.31	3	7	73.3064	P18085	ADP-ribosylation factor 4 OS=Homo sapiens GN=ARF4 PE=1 SV=3 - [ARF4_HUMAN]	35.2737	30	3	5	20.4977	B5BU72	Phosphatidylinositol-binding clathrin assembly protein isoform 2 OS=Homo sapiens GN=PICALM PE=2 SV=1 - [B5BU72_HUMAN]	19.4134	11.8	7	5	66.3518	P18085
P17987	T-complex protein 1 subunit alpha OS=Homo sapiens GN=TCP1 PE=1 SV=1 - [TCPA_HUMAN]	17.0705	14.03	1	6	60.3056	Q5R209	Carbamoylphosphate synthetase I OS=Homo sapiens GN=CPS1 PE=2 SV=1 - [Q5R209_HUMAN]	21.0345	6.34	13	6	138.315	G3XAL7	Putative uncharacterized protein LOC133619 OS=Homo sapiens GN=PRRC1 PE=4 SV=1 - [G3XAL7_HUMAN]	15.3548	11.91	5	4	46.4576	Q96P70	Importin-9 OS=Homo sapiens GN=IPO9 PE=1 SV=3 - [IPO9_HUMAN]	22.2524	7.97	1	6	115.889	Q8WWM7	Ataxin-2-like protein OS=Homo sapiens GN=ATXN2L PE=1 SV=2 - [ATX2L_HUMAN]	19.5635	9.58	4	7	113.304	P61254	60S ribosomal protein L26 OS=Homo sapiens GN=RPL26 PE=1 SV=1 - [RL26_HUMAN]	35.1244	45.52	9	10	17.2475	B3KY79	cDNA FLJ46620 fis, clone TLUNG2000654, highly similar to Keratin, type II cytoskeletal 7 OS=Homo sapiens PE=2 SV=1 - [B3KY79_HUMAN]	19.3692	15.28	10	8	49.0051	K7EQF4
B7Z475	Transducin (beta)-like 1 X-linked receptor 1 OS=Homo sapiens GN=TBL1XR1 PE=2 SV=1 - [B7Z475_HUMAN]	16.9976	15.16	2	4	40.7308	B4DRD7	Poly(rC) binding protein 2 OS=Homo sapiens GN=PCBP2 PE=2 SV=1 - [B4DRD7_HUMAN]	21.0125	34.4	13	8	29.7182	B1ANR0	Poly(A) binding protein, cytoplasmic 4 (Inducible form) OS=Homo sapiens GN=PABPC4 PE=4 SV=1 - [B1ANR0_HUMAN]	15.2744	11.06	5	2	67.9279	B4DKX4	cDNA FLJ58014, highly similar to Homo sapiens programmed cell death 4, transcript variant 1, mRNA OS=Homo sapiens PE=2 SV=1 - [B4DKX4_HUMAN]	22.1858	18.68	4	6	50.1974	A8K6V3	cDNA FLJ78677, highly similar to Homo sapiens splicing factor 3b, subunit 3, 130kDa (SF3B3), mRNA OS=Homo sapiens PE=2 SV=1 - [A8K6V3_HUMAN]	19.4646	8.13	4	7	135.493	B7ZL00	Protein transport protein Sec31A OS=Homo sapiens GN=SEC31A PE=2 SV=1 - [B7ZL00_HUMAN]	34.9932	11.49	9	12	127.475	P62258	14-3-3 protein epsilon OS=Homo sapiens GN=YWHAE PE=1 SV=1 - [1433E_HUMAN]	19.338	24.71	8	6	29.1554	P16615
P67809	Nuclease-sensitive element-binding protein 1 OS=Homo sapiens GN=YBX1 PE=1 SV=3 - [YBOX1_HUMAN]	16.9898	20.37	2	4	35.9027	P80723-2	Isoform 2 of Brain acid soluble protein 1 OS=Homo sapiens GN=BASP1 - [BASP1_HUMAN]	20.9445	35.84	2	4	17.6536	Q13283	Ras GTPase-activating protein-binding protein 1 OS=Homo sapiens GN=G3BP1 PE=1 SV=1 - [G3BP1_HUMAN]	15.2581	14.81	2	5	52.1321	B4DU15	cDNA FLJ54549, highly similar to Pumilio homolog 1 OS=Homo sapiens PE=2 SV=1 - [B4DU15_HUMAN]	22.0552	10.44	9	8	111.605	B7ZL00	Protein transport protein Sec31A OS=Homo sapiens GN=SEC31A PE=2 SV=1 - [B7ZL00_HUMAN]	19.3823	8.23	9	8	127.475	P53618	Coatomer subunit beta OS=Homo sapiens GN=COPB1 PE=1 SV=3 - [COPB_HUMAN]	34.968	13.33	2	10	107.074	B4DQF6	Eukaryotic translation initiation factor 3 subunit L OS=Homo sapiens GN=EIF3L PE=2 SV=1 - [B4DQF6_HUMAN]	19.3355	13.94	12	5	62.6515	Q9Y678
Q5J8M4	Migration-inducing gene 14 OS=Homo sapiens PE=2 SV=1 - [Q5J8M4_HUMAN]	16.9894	21.59	3	6	39.4532	O00425	Insulin-like growth factor 2 mRNA-binding protein 3 OS=Homo sapiens GN=IGF2BP3 PE=1 SV=2 - [IF2B3_HUMAN]	20.9443	16.75	10	8	63.6656	P38919	Eukaryotic initiation factor 4A-III OS=Homo sapiens GN=EIF4A3 PE=1 SV=4 - [IF4A3_HUMAN]	15.0611	14.36	1	4	46.8412	O60664	Perilipin-3 OS=Homo sapiens GN=PLIN3 PE=1 SV=3 - [PLIN3_HUMAN]	22.004	20.97	1	7	47.0459	A8K6Q8	cDNA FLJ75881, highly similar to Homo sapiens transferrin receptor (p90, CD71) (TFRC), mRNA OS=Homo sapiens PE=2 SV=1 - [A8K6Q8_HUMAN]	19.3547	10.26	5	6	84.8199	A0PJ62	RPL14 protein (Fragment) OS=Homo sapiens GN=RPL14 PE=2 SV=1 - [A0PJ62_HUMAN]	34.7706	41.94	6	5	14.6019	E7ETK0	40S ribosomal protein S24 OS=Homo sapiens GN=RPS24 PE=2 SV=1 - [E7ETK0_HUMAN]	19.3081	29.77	2	4	15.1873	P63104
P62820-2	Isoform 2 of Ras-related protein Rab-1A OS=Homo sapiens GN=RAB1A - [RAB1A_HUMAN]	16.9843	39.72	4	4	15.3207	G3V0E8	Poly(RC) binding protein 2, isoform CRA_f OS=Homo sapiens GN=PCBP2 PE=4 SV=1 - [G3V0E8_HUMAN]	20.8888	29.25	20	8	33.4753	P14923	Junction plakoglobin OS=Homo sapiens GN=JUP PE=1 SV=3 - [PLAK_HUMAN]	15.0427	10.87	1	6	81.6927	Q5HY54	Filamin A, alpha OS=Homo sapiens GN=FLNA PE=2 SV=1 - [Q5HY54_HUMAN]	21.8587	4.26	3	8	276.378	B4E3I9	cDNA FLJ58234, highly similar to IkappaB kinase complex-associated protein OS=Homo sapiens PE=2 SV=1 - [B4E3I9_HUMAN]	19.3294	7.14	8	7	138.021	B3KNB4	cDNA FLJ14168 fis, clone NT2RP2001440, highly similar to 14-3-3 protein gamma OS=Homo sapiens PE=2 SV=1 - [B3KNB4_HUMAN]	34.4395	31.17	5	8	28.2249	P62820	Ras-related protein Rab-1A OS=Homo sapiens GN=RAB1A PE=1 SV=3 - [RAB1A_HUMAN]	19.3009	37.07	21	6	22.6634	P62917
Q13501-2	Isoform 2 of Sequestosome-1 OS=Homo sapiens GN=SQSTM1 - [SQSTM_HUMAN]	16.5045	20.22	2	5	38.6045	B4DZ53	cDNA FLJ59643, highly similar to Neutral alpha-glucosidase AB OS=Homo sapiens PE=2 SV=1 - [B4DZ53_HUMAN]	20.8228	9.27	10	7	96.4671	P62979	Ubiquitin-40S ribosomal protein S27a OS=Homo sapiens GN=RPS27A PE=1 SV=2 - [RS27A_HUMAN]	14.997	38.46	2	6	17.9535	Q7Z417	Nuclear fragile X mental retardation-interacting protein 2 OS=Homo sapiens GN=NUFIP2 PE=1 SV=1 - [NUFP2_HUMAN]	21.7589	13.96	1	7	76.0747	P46781	40S ribosomal protein S9 OS=Homo sapiens GN=RPS9 PE=1 SV=3 - [RS9_HUMAN]	19.2708	40.72	7	11	22.5776	P25685	DnaJ homolog subfamily B member 1 OS=Homo sapiens GN=DNAJB1 PE=1 SV=4 - [DNJB1_HUMAN]	34.3545	28.53	9	8	38.0204	B4DYD8	T-complex protein 1 subunit epsilon OS=Homo sapiens GN=CCT5 PE=2 SV=1 - [B4DYD8_HUMAN]	19.2118	25	16	11	49.4948	B4DX42
B1ANR0	Poly(A) binding protein, cytoplasmic 4 (Inducible form) OS=Homo sapiens GN=PABPC4 PE=4 SV=1 - [B1ANR0_HUMAN]	16.331	10.57	5	5	67.9279	G3V2B8	Methylenetetrahydrofolate dehydrogenase (NADP+ dependent) 1, methenyltetrahydrofolate cyclohydrolase, formyltetrahydrofolate synthetase OS=Homo sapiens GN=MTHFD1 PE=3 SV=1 - [G3V2B8_HUMAN]	20.8085	11.23	5	9	101.467	B4DZQ7	cDNA FLJ58652, highly similar to Probable ATP-dependent RNA helicase DDX17 (EC 3.6.1.-) OS=Homo sapiens PE=2 SV=1 - [B4DZQ7_HUMAN]	14.8858	14.29	8	2	47.5272	Q13085-3	Isoform 3 of Acetyl-CoA carboxylase 1 OS=Homo sapiens GN=ACACA - [ACACA_HUMAN]	21.663	5.78	4	12	257.075	B7Z1C9	Chaperonin containing TCP1, subunit 7 (Eta), isoform CRA_a OS=Homo sapiens GN=CCT7 PE=2 SV=1 - [B7Z1C9_HUMAN]	19.2177	21.45	7	7	46.0655	Q9NZI8	Insulin-like growth factor 2 mRNA-binding protein 1 OS=Homo sapiens GN=IGF2BP1 PE=1 SV=2 - [IF2B1_HUMAN]	34.2494	14.38	2	6	63.4412	Q92945	Far upstream element-binding protein 2 OS=Homo sapiens GN=KHSRP PE=1 SV=4 - [FUBP2_HUMAN]	19.1955	13.08	6	8	73.07	Q13148
B4DDF4	cDNA FLJ52469, highly similar to Calponin-2 OS=Homo sapiens PE=2 SV=1 - [B4DDF4_HUMAN]	16.2477	27.85	5	7	32.5956	Q9Y266	Nuclear migration protein nudC OS=Homo sapiens GN=NUDC PE=1 SV=1 - [NUDC_HUMAN]	20.8041	26.59	2	8	38.2191	G3V576	Uncharacterized protein OS=Homo sapiens GN=HNRNPC PE=4 SV=1 - [G3V576_HUMAN]	14.7974	25.54	12	5	25.2411	P07814	Bifunctional glutamate/proline--tRNA ligase OS=Homo sapiens GN=EPRS PE=1 SV=5 - [SYEP_HUMAN]	21.4571	6.15	1	8	170.483	P17858	6-phosphofructokinase, liver type OS=Homo sapiens GN=PFKL PE=1 SV=6 - [K6PL_HUMAN]	19.1907	9.49	4	6	84.9642	P62979	Ubiquitin-40S ribosomal protein S27a OS=Homo sapiens GN=RPS27A PE=1 SV=2 - [RS27A_HUMAN]	34.203	38.46	45	6	17.9535	P26038	Moesin OS=Homo sapiens GN=MSN PE=1 SV=3 - [MOES_HUMAN]	19.0872	13	12	8	67.7778	K7ERE3
B4E2Z3	Uncharacterized protein OS=Homo sapiens GN=SLC3A2 PE=2 SV=1 - [B4E2Z3_HUMAN]	16.1389	18.4	7	7	55.9047	P62277	40S ribosomal protein S13 OS=Homo sapiens GN=RPS13 PE=1 SV=2 - [RS13_HUMAN]	20.7867	43.71	2	7	17.2117	Q0IIN1	Keratin 77 OS=Homo sapiens GN=KRT77 PE=2 SV=1 - [Q0IIN1_HUMAN]	14.6805	6.92	2	2	61.7644	B4DZ53	cDNA FLJ59643, highly similar to Neutral alpha-glucosidase AB OS=Homo sapiens PE=2 SV=1 - [B4DZ53_HUMAN]	21.4526	8.92	3	6	96.4671	Q15459	Splicing factor 3A subunit 1 OS=Homo sapiens GN=SF3A1 PE=1 SV=1 - [SF3A1_HUMAN]	19.1477	11.48	3	8	88.8305	P62258	14-3-3 protein epsilon OS=Homo sapiens GN=YWHAE PE=1 SV=1 - [1433E_HUMAN]	34.0522	27.06	9	7	29.1554	Q9Y263	Phospholipase A-2-activating protein OS=Homo sapiens GN=PLAA PE=1 SV=2 - [PLAP_HUMAN]	18.9712	11.32	4	7	87.1014	P06493
E9PPU1	Ribosomal protein S3 OS=Homo sapiens GN=RPS3 PE=4 SV=1 - [E9PPU1_HUMAN]	16.1008	38.61	2	5	17.3965	O95373	Importin-7 OS=Homo sapiens GN=IPO7 PE=1 SV=1 - [IPO7_HUMAN]	20.6766	10.79	4	8	119.44	G5E9V1	TRK-fused OS=Homo sapiens GN=TFG PE=4 SV=1 - [G5E9V1_HUMAN]	14.6659	15.15	3	5	42.994	B7Z2Z8	T-complex protein 1 subunit delta OS=Homo sapiens PE=2 SV=1 - [B7Z2Z8_HUMAN]	21.3711	20.29	4	9	52.2678	C9JXB8	60S ribosomal protein L24 OS=Homo sapiens GN=RPL24 PE=2 SV=1 - [C9JXB8_HUMAN]	19.0172	41.32	3	6	14.3598	D3YTB1	60S ribosomal protein L32 (Fragment) OS=Homo sapiens GN=RPL32 PE=2 SV=1 - [D3YTB1_HUMAN]	34.0522	34.59	3	5	15.6067	P39019	40S ribosomal protein S19 OS=Homo sapiens GN=RPS19 PE=1 SV=2 - [RS19_HUMAN]	18.8994	31.03	6	6	16.0505	Q9BSQ6
P14923	Junction plakoglobin OS=Homo sapiens GN=JUP PE=1 SV=3 - [PLAK_HUMAN]	16.0679	6.44	1	4	81.6927	P13010	X-ray repair cross-complementing protein 5 OS=Homo sapiens GN=XRCC5 PE=1 SV=3 - [XRCC5_HUMAN]	20.5969	15.3	4	11	82.6523	P61019	Ras-related protein Rab-2A OS=Homo sapiens GN=RAB2A PE=1 SV=1 - [RAB2A_HUMAN]	14.3811	43.4	1	7	23.5308	Q5ISS9	Tyrosine 3-monooxygenase/tryptophan 5-monooxygenase activation protein theta isoform (Fragment) OS=Macaca fascicularis PE=2 SV=1 - [Q5ISS9_MACFA]	21.309	30.51	2	8	26.6462	F8W181	60S ribosomal protein L6 (Fragment) OS=Homo sapiens GN=RPL6 PE=2 SV=1 - [F8W181_HUMAN]	18.9578	39.82	9	8	25.8758	P84085	ADP-ribosylation factor 5 OS=Homo sapiens GN=ARF5 PE=1 SV=2 - [ARF5_HUMAN]	33.9278	33.89	3	6	20.5166	B3KM89	cDNA FLJ10528 fis, clone NT2RP2000943, highly similar to Protein transport protein Sec24D OS=Homo sapiens PE=2 SV=1 - [B3KM89_HUMAN]	18.8352	8.94	7	7	100.183	B4DM19
B3KQG6	cDNA FLJ90427 fis, clone NT2RP3000481, highly similar to Importin-7 OS=Homo sapiens PE=2 SV=1 - [B3KQG6_HUMAN]	15.978	9.14	2	5	82.4626	E9PQD7	Ribosomal protein S2 OS=Homo sapiens GN=RPS2 PE=4 SV=1 - [E9PQD7_HUMAN]	20.4971	34.47	18	7	25.1952	Q5JR95	Ribosomal protein S8 OS=Homo sapiens GN=RPS8 PE=4 SV=1 - [Q5JR95_HUMAN]	14.3442	34.04	2	5	21.866	P62258	14-3-3 protein epsilon OS=Homo sapiens GN=YWHAE PE=1 SV=1 - [1433E_HUMAN]	21.1806	33.33	3	8	29.1554	P07814	Bifunctional glutamate/proline--tRNA ligase OS=Homo sapiens GN=EPRS PE=1 SV=5 - [SYEP_HUMAN]	18.8711	6.94	5	8	170.483	B4DJU4	cDNA FLJ53344, highly similar to Splicing factor 1 OS=Homo sapiens PE=2 SV=1 - [B4DJU4_HUMAN]	33.8108	11.9	7	7	67.3065	P37802	Transgelin-2 OS=Homo sapiens GN=TAGLN2 PE=1 SV=3 - [TAGL2_HUMAN]	18.7888	29.65	1	5	22.3772	P46783
P62258	14-3-3 protein epsilon OS=Homo sapiens GN=YWHAE PE=1 SV=1 - [1433E_HUMAN]	15.7112	28.63	3	7	29.1554	Q09666	Neuroblast differentiation-associated protein AHNAK OS=Homo sapiens GN=AHNAK PE=1 SV=2 - [AHNK_HUMAN]	20.3256	3.62	13	7	628.699	A8MWI8	Chaperonin containing TCP1, subunit 7 (eta) OS=Homo sapiens GN=CCT7 PE=2 SV=1 - [A8MWI8_HUMAN]	14.2644	18.88	10	5	37.4749	B4DXN6	cDNA FLJ53461, highly similar to Eukaryotic translation initiation factor 3 subunit 9 OS=Homo sapiens PE=2 SV=1 - [B4DXN6_HUMAN]	21.0796	14.67	6	8	77.1769	Q8N9Z3	cDNA FLJ36025 fis, clone TESTI2016701, highly similar to TUMOR NECROSIS FACTOR TYPE 1 RECEPTOR ASSOCIATED PROTEIN OS=Homo sapiens PE=2 SV=1 - [Q8N9Z3_HUMAN]	18.8528	11.05	12	5	66.005	Q6UYC3	Prelamin-A/C OS=Homo sapiens GN=LMNA PE=2 SV=1 - [Q6UYC3_HUMAN]	33.7888	17.43	11	9	69.2073	Q08211	ATP-dependent RNA helicase A OS=Homo sapiens GN=DHX9 PE=1 SV=4 - [DHX9_HUMAN]	18.7654	9.13	4	10	140.869	M0R3D6
Q9Y5A9-2	Isoform 2 of YTH domain family protein 2 OS=Homo sapiens GN=YTHDF2 - [YTHD2_HUMAN]	15.6535	11.91	4	5	56.8421	Q7Z3U5	Putative uncharacterized protein DKFZp686L0869 OS=Homo sapiens GN=DKFZp686L0869 PE=2 SV=1 - [Q7Z3U5_HUMAN]	20.3146	6.92	15	8	142.228	Q13501-2	Isoform 2 of Sequestosome-1 OS=Homo sapiens GN=SQSTM1 - [SQSTM_HUMAN]	14.2102	20.22	2	5	38.6045	P61289	Proteasome activator complex subunit 3 OS=Homo sapiens GN=PSME3 PE=1 SV=1 - [PSME3_HUMAN]	21.0087	20.47	2	5	29.4876	P45974	Ubiquitin carboxyl-terminal hydrolase 5 OS=Homo sapiens GN=USP5 PE=1 SV=2 - [UBP5_HUMAN]	18.8077	10.26	1	8	95.7253	C9JXB8	60S ribosomal protein L24 OS=Homo sapiens GN=RPL24 PE=2 SV=1 - [C9JXB8_HUMAN]	33.6897	39.67	3	5	14.3598	M0R3D6	60S ribosomal protein L18a (Fragment) OS=Homo sapiens GN=RPL18A PE=4 SV=1 - [M0R3D6_HUMAN]	18.6825	43.97	11	7	16.7038	P39023
A6NLC4	Uncharacterized protein OS=Homo sapiens GN=ATXN10 PE=2 SV=4 - [A6NLC4_HUMAN]	15.5755	19.22	2	6	46.2572	P62244	40S ribosomal protein S15a OS=Homo sapiens GN=RPS15A PE=1 SV=2 - [RS15A_HUMAN]	20.3136	36.15	2	5	14.83	P61026	Ras-related protein Rab-10 OS=Homo sapiens GN=RAB10 PE=1 SV=1 - [RAB10_HUMAN]	14.1626	26.5	1	3	22.5266	Q5T6F2	Ubiquitin-associated protein 2 OS=Homo sapiens GN=UBAP2 PE=1 SV=1 - [UBAP2_HUMAN]	20.8694	7.86	1	6	117.044	F8VZV5	Myosin light polypeptide 6 OS=Homo sapiens GN=MYL6 PE=2 SV=1 - [F8VZV5_HUMAN]	18.763	46.67	15	5	15.0113	B2RAM6	cDNA, FLJ95005, highly similar to Homo sapiens kinesin family member 11 (KIF11), mRNA OS=Homo sapiens PE=2 SV=1 - [B2RAM6_HUMAN]	33.6406	11.17	3	10	119.058	B4DZI8	Coatomer protein complex, subunit beta 2 (Beta prime), isoform CRA_b OS=Homo sapiens GN=COPB2 PE=2 SV=1 - [B4DZI8_HUMAN]	18.6743	9.46	2	8	98.9836	B4DZI8
Q8WUW7	Pyruvate kinase (Fragment) OS=Homo sapiens GN=PKM2 PE=2 SV=2 - [Q8WUW7_HUMAN]	15.4833	16.33	5	5	37.2524	B4DM74	Uncharacterized protein OS=Homo sapiens GN=RPL18A PE=2 SV=1 - [B4DM74_HUMAN]	20.1607	40.26	8	7	18.0984	Q8WX93-4	Isoform 4 of Palladin OS=Homo sapiens GN=PALLD - [PALLD_HUMAN]	14.1318	10.42	6	6	73.2757	P52597	Heterogeneous nuclear ribonucleoprotein F OS=Homo sapiens GN=HNRNPF PE=1 SV=3 - [HNRPF_HUMAN]	20.6811	21.2	1	7	45.6429	P17812	CTP synthase 1 OS=Homo sapiens GN=CTPS1 PE=1 SV=2 - [PYRG1_HUMAN]	18.642	12.52	5	7	66.648	E9PBS1	Phosphoribosylaminoimidazole carboxylase (Fragment) OS=Homo sapiens GN=PAICS PE=2 SV=1 - [E9PBS1_HUMAN]	33.425	31.23	4	11	45.6224	Q9BTQ7	Similar to ribosomal protein L23 (Fragment) OS=Homo sapiens PE=2 SV=1 - [Q9BTQ7_HUMAN]	18.6551	39.55	6	4	14.1407	P52597
P62847-2	Isoform 2 of 40S ribosomal protein S24 OS=Homo sapiens GN=RPS24 - [RS24_HUMAN]	15.4111	30	5	4	15.0592	P53618	Coatomer subunit beta OS=Homo sapiens GN=COPB1 PE=1 SV=3 - [COPB_HUMAN]	20.0022	9.76	4	7	107.074	B4E1E2	cDNA FLJ61530, highly similar to Hepatocyte growth factor-regulated tyrosine kinase substrate OS=Homo sapiens PE=2 SV=1 - [B4E1E2_HUMAN]	14.1071	9.53	6	6	74.8076	Q5IST6	Peroxiredoxin 1 (Fragment) OS=Macaca fascicularis PE=2 SV=1 - [Q5IST6_MACFA]	20.6495	39.89	3	8	20.8527	P63104	14-3-3 protein zeta/delta OS=Homo sapiens GN=YWHAZ PE=1 SV=1 - [1433Z_HUMAN]	18.6331	18.37	12	4	27.7277	Q2TAM5	RELA protein OS=Homo sapiens GN=RELA PE=2 SV=1 - [Q2TAM5_HUMAN]	33.4036	27.32	10	9	42.8416	P26373	60S ribosomal protein L13 OS=Homo sapiens GN=RPL13 PE=1 SV=4 - [RL13_HUMAN]	18.6546	24.64	5	6	24.2465	P30050
Q02413	Desmoglein-1 OS=Homo sapiens GN=DSG1 PE=1 SV=2 - [DSG1_HUMAN]	15.3962	5.53	1	4	113.676	Q9BQ04	RNA-binding protein 4B OS=Homo sapiens GN=RBM4B PE=1 SV=1 - [RBM4B_HUMAN]	19.8265	24.23	5	8	40.1244	P31942-3	Isoform 3 of Heterogeneous nuclear ribonucleoprotein H3 OS=Homo sapiens GN=HNRNPH3 - [HNRH3_HUMAN]	13.9696	16.5	4	3	31.5054	Q13347	Eukaryotic translation initiation factor 3 subunit I OS=Homo sapiens GN=EIF3I PE=1 SV=1 - [EIF3I_HUMAN]	20.5884	24.62	2	7	36.4786	A8K3Q9	cDNA FLJ76611, highly similar to Homo sapiens ribosomal protein L14 (RPL14), mRNA OS=Homo sapiens PE=2 SV=1 - [A8K3Q9_HUMAN]	18.5556	25	1	5	23.44	P04083	Annexin A1 OS=Homo sapiens GN=ANXA1 PE=1 SV=2 - [ANXA1_HUMAN]	33.3068	30.64	5	9	38.69	A8K492	cDNA FLJ76789, highly similar to Homo sapiens methionine-tRNA synthetase (MARS), mRNA OS=Homo sapiens PE=2 SV=1 - [A8K492_HUMAN]	18.5001	9.22	8	6	101.08	B3KTJ9
P31947-2	Isoform 2 of 14-3-3 protein sigma OS=Homo sapiens GN=SFN - [1433S_HUMAN]	15.3899	23.15	2	5	24.321	B4DQW2	NOL1/NOP2/Sun domain family, member 2, isoform CRA_a OS=Homo sapiens GN=NSUN2 PE=2 SV=1 - [B4DQW2_HUMAN]	19.7912	11.48	6	6	82.3407	B3KQV6	cDNA FLJ33169 fis, clone ADRGL2000384, highly similar to Serine/threonine-protein phosphatase 2A 65 kDa regulatory subunit A alpha isoform OS=Homo sapiens PE=2 SV=1 - [B3KQV6_HUMAN]	13.9257	12.44	8	3	45.5748	A6NLC4	Uncharacterized protein OS=Homo sapiens GN=ATXN10 PE=2 SV=4 - [A6NLC4_HUMAN]	20.5825	26.76	2	9	46.2572	B3KX11	cDNA FLJ44436 fis, clone UTERU2019706, highly similar to T-complex protein 1 subunit gamma OS=Homo sapiens PE=2 SV=1 - [B3KX11_HUMAN]	18.5257	14.18	11	8	57.909	P18124	60S ribosomal protein L7 OS=Homo sapiens GN=RPL7 PE=1 SV=1 - [RL7_HUMAN]	33.26	28.63	4	8	29.2072	B3KN10	cDNA FLJ13176 fis, clone NT2RP3003846, highly similar to SEC23-interacting protein OS=Homo sapiens PE=2 SV=1 - [B3KN10_HUMAN]	18.361	20.74	5	6	42.5305	P04075
Q96DH6-3	Isoform 3 of RNA-binding protein Musashi homolog 2 OS=Homo sapiens GN=MSI2 - [MSI2H_HUMAN]	15.3713	33.77	5	4	17.2264	A8K7D9	cDNA FLJ78270, highly similar to Homo sapiens karyopherin alpha 2 (RAG cohort 1, importin alpha 1)(KPNA2), mRNA OS=Homo sapiens PE=2 SV=1 - [A8K7D9_HUMAN]	19.7648	12.85	5	4	57.7979	Q2YDC2	HCG1985580, isoform CRA_f OS=Homo sapiens GN=PDCD6 PE=2 SV=1 - [Q2YDC2_HUMAN]	13.9192	24.34	2	4	21.6507	Q96CG1	ETF1 protein OS=Homo sapiens GN=ETF1 PE=2 SV=1 - [Q96CG1_HUMAN]	20.3835	18.32	3	6	45.4343	P62854	40S ribosomal protein S26 OS=Homo sapiens GN=RPS26 PE=1 SV=3 - [RS26_HUMAN]	18.5163	31.3	3	3	13.0071	O75533	Splicing factor 3B subunit 1 OS=Homo sapiens GN=SF3B1 PE=1 SV=3 - [SF3B1_HUMAN]	33.2395	9.97	6	10	145.738	B4DZ53	cDNA FLJ59643, highly similar to Neutral alpha-glucosidase AB OS=Homo sapiens PE=2 SV=1 - [B4DZ53_HUMAN]	18.3321	10.45	4	7	96.4671	Q7Z417
E5RIU6	Cyclin-dependent kinase 1 (Fragment) OS=Homo sapiens GN=CDK1 PE=3 SV=1 - [E5RIU6_HUMAN]	15.2551	32.8	3	6	21.7105	Q7Z417	Nuclear fragile X mental retardation-interacting protein 2 OS=Homo sapiens GN=NUFIP2 PE=1 SV=1 - [NUFP2_HUMAN]	19.2939	12.37	2	7	76.0747	Q8WUF5	RelA-associated inhibitor OS=Homo sapiens GN=PPP1R13L PE=1 SV=4 - [IASPP_HUMAN]	13.8115	7.13	1	5	89.0357	P14868	Aspartate--tRNA ligase, cytoplasmic OS=Homo sapiens GN=DARS PE=1 SV=2 - [SYDC_HUMAN]	20.3289	22.75	1	9	57.1	P62753	40S ribosomal protein S6 OS=Homo sapiens GN=RPS6 PE=1 SV=1 - [RS6_HUMAN]	18.4684	20.48	5	5	28.663	B4DY16	cDNA FLJ51385, highly similar to Ran GTPase-activating protein 1 OS=Homo sapiens PE=2 SV=1 - [B4DY16_HUMAN]	33.1653	14.66	6	6	57.722	P62195	26S protease regulatory subunit 8 OS=Homo sapiens GN=PSMC5 PE=1 SV=1 - [PRS8_HUMAN]	18.2957	20.44	7	6	45.5971	F8W840
B4DZT5	cDNA FLJ53116, highly similar to T-complex protein 1 subunit epsilon OS=Homo sapiens PE=2 SV=1 - [B4DZT5_HUMAN]	15.2373	14.6	7	7	55.9901	Q96IF9	VCP protein (Fragment) OS=Homo sapiens GN=VCP PE=2 SV=2 - [Q96IF9_HUMAN]	19.2514	11.18	7	5	71.0211	P37198	Nuclear pore glycoprotein p62 OS=Homo sapiens GN=NUP62 PE=1 SV=3 - [NUP62_HUMAN]	13.624	7.28	1	3	53.2225	B7Z4V2	Heat shock 70kDa protein 9 (mortalin) OS=Homo sapiens GN=HSPA9 PE=2 SV=1 - [B7Z4V2_HUMAN]	20.2153	12.78	3	6	72.3561	P53621	Coatomer subunit alpha OS=Homo sapiens GN=COPA PE=1 SV=2 - [COPA_HUMAN]	18.448	7.52	1	8	138.258	Q14444	Caprin-1 OS=Homo sapiens GN=CAPRIN1 PE=1 SV=2 - [CAPR1_HUMAN]	33.1319	10.58	6	8	78.318	B7Z9L0	T-complex protein 1 subunit delta OS=Homo sapiens GN=CCT4 PE=2 SV=1 - [B7Z9L0_HUMAN]	18.1942	16.36	5	6	52.2979	E9PPJ0
Q12906-5	Isoform 5 of Interleukin enhancer-binding factor 3 OS=Homo sapiens GN=ILF3 - [ILF3_HUMAN]	15.1878	8.41	12	5	74.5603	P29966	Myristoylated alanine-rich C-kinase substrate OS=Homo sapiens GN=MARCKS PE=1 SV=4 - [MARCS_HUMAN]	19.1879	20.78	3	4	31.5359	P61289	Proteasome activator complex subunit 3 OS=Homo sapiens GN=PSME3 PE=1 SV=1 - [PSME3_HUMAN]	13.5932	23.62	2	5	29.4876	B1AHC9	Uncharacterized protein OS=Homo sapiens GN=XRCC6 PE=4 SV=1 - [B1AHC9_HUMAN]	20.1622	16.99	5	8	64.243	P25685	DnaJ homolog subfamily B member 1 OS=Homo sapiens GN=DNAJB1 PE=1 SV=4 - [DNJB1_HUMAN]	18.3888	26.47	10	7	38.0204	P55060	Exportin-2 OS=Homo sapiens GN=CSE1L PE=1 SV=3 - [XPO2_HUMAN]	32.8618	10.2	8	8	110.346	Q704T5	MHC class I antigen (Fragment) OS=Homo sapiens GN=HLA-A PE=3 SV=1 - [Q704T5_HUMAN]	18.1775	23.49	103	5	34.2506	B4E2Z3
O14980	Exportin-1 OS=Homo sapiens GN=XPO1 PE=1 SV=1 - [XPO1_HUMAN]	15.1562	6.07	1	6	123.306	E9PB51	RNA binding motif protein 4 (Fragment) OS=Homo sapiens GN=RBM4 PE=4 SV=1 - [E9PB51_HUMAN]	19.1297	35	11	8	26.2701	Q59GS3	Proteasome 26S ATPase subunit 5 variant (Fragment) OS=Homo sapiens PE=2 SV=1 - [Q59GS3_HUMAN]	13.425	15.94	3	4	38.7364	P62979	Ubiquitin-40S ribosomal protein S27a OS=Homo sapiens GN=RPS27A PE=1 SV=2 - [RS27A_HUMAN]	20.0533	38.46	2	6	17.9535	E9PK01	Elongation factor 1-delta (Fragment) OS=Homo sapiens GN=EEF1D PE=2 SV=1 - [E9PK01_HUMAN]	18.3697	28.35	20	6	28.8036	E5RIT6	60S ribosomal protein L26-like 1 (Fragment) OS=Homo sapiens GN=RPL26L1 PE=2 SV=1 - [E5RIT6_HUMAN]	32.8089	45.31	4	9	15.1975	E9PBS1	Phosphoribosylaminoimidazole carboxylase (Fragment) OS=Homo sapiens GN=PAICS PE=2 SV=1 - [E9PBS1_HUMAN]	18.0552	19.61	4	6	45.6224	B4DRA5
H0YJ34	Fermitin family member 2 (Fragment) OS=Homo sapiens GN=FERMT2 PE=4 SV=1 - [H0YJ34_HUMAN]	15.148	10.31	4	5	73.3064	B4DZF1	cDNA FLJ56541, highly similar to Ubiquilin-2 OS=Homo sapiens PE=2 SV=1 - [B4DZF1_HUMAN]	18.9024	13.48	5	5	54.9651	P62847-2	Isoform 2 of 40S ribosomal protein S24 OS=Homo sapiens GN=RPS24 - [RS24_HUMAN]	13.4237	30	5	4	15.0592	Q96EP5-2	Isoform 2 of DAZ-associated protein 1 OS=Homo sapiens GN=DAZAP1 - [DAZP1_HUMAN]	20.0076	20.63	2	5	40.5038	P37802	Transgelin-2 OS=Homo sapiens GN=TAGLN2 PE=1 SV=3 - [TAGL2_HUMAN]	18.303	29.65	1	5	22.3772	B4E1E2	cDNA FLJ61530, highly similar to Hepatocyte growth factor-regulated tyrosine kinase substrate OS=Homo sapiens PE=2 SV=1 - [B4E1E2_HUMAN]	32.7214	15.89	6	11	74.8076	B4DSM6	cDNA FLJ54057, highly similar to Neutral alpha-glucosidase AB OS=Homo sapiens PE=2 SV=1 - [B4DSM6_HUMAN]	17.8497	10.98	5	7	96.2249	B5BU24
Q92783-2	Isoform 2 of Signal transducing adapter molecule 1 OS=Homo sapiens GN=STAM - [STAM1_HUMAN]	15.1468	17.12	2	5	44.9432	P30044-2	Isoform Cytoplasmic+peroxisomal of Peroxiredoxin-5, mitochondrial OS=Homo sapiens GN=PRDX5 - [PRDX5_HUMAN]	18.8151	48.77	6	6	17.02	Q9UK41	Vacuolar protein sorting-associated protein 28 homolog OS=Homo sapiens GN=VPS28 PE=1 SV=1 - [VPS28_HUMAN]	13.4098	24.43	1	4	25.4086	P62136	Serine/threonine-protein phosphatase PP1-alpha catalytic subunit OS=Homo sapiens GN=PPP1CA PE=1 SV=1 - [PP1A_HUMAN]	19.8176	20	3	6	37.4878	B3KTM6	Ribosomal protein L5, isoform CRA_b OS=Homo sapiens GN=RPL5 PE=2 SV=1 - [B3KTM6_HUMAN]	18.1903	26.72	5	5	28.0262	B4DNK4	Pyruvate kinase OS=Homo sapiens PE=2 SV=1 - [B4DNK4_HUMAN]	32.6095	18.6	11	8	49.8659	P62277	40S ribosomal protein S13 OS=Homo sapiens GN=RPS13 PE=1 SV=2 - [RS13_HUMAN]	17.7781	29.8	2	5	17.2117	O95817
F8VZY9	Keratin 18 OS=Homo sapiens GN=KRT18 PE=3 SV=1 - [F8VZY9_HUMAN]	15.1251	12.28	3	6	43.7474	P29361	14-3-3 protein zeta/delta OS=Ovis aries GN=YWHAZ PE=1 SV=1 - [1433Z_SHEEP]	18.7521	25.71	26	6	27.8388	G5E9B2	Chaperonin containing TCP1, subunit 8 (Theta), isoform CRA_a OS=Homo sapiens GN=CCT8 PE=3 SV=1 - [G5E9B2_HUMAN]	13.3958	10.42	3	5	59.4404	Q6PKI6	YBX1 protein (Fragment) OS=Homo sapiens GN=YBX1 PE=2 SV=1 - [Q6PKI6_HUMAN]	19.8088	22.18	4	4	29.3567	B3KY79	cDNA FLJ46620 fis, clone TLUNG2000654, highly similar to Keratin, type II cytoskeletal 7 OS=Homo sapiens PE=2 SV=1 - [B3KY79_HUMAN]	18.1211	14.61	10	8	49.0051	Q99536	Synaptic vesicle membrane protein VAT-1 homolog OS=Homo sapiens GN=VAT1 PE=1 SV=2 - [VAT1_HUMAN]	32.5667	20.36	9	7	41.8934	P11177	Pyruvate dehydrogenase E1 component subunit beta, mitochondrial OS=Homo sapiens GN=PDHB PE=1 SV=3 - [ODPB_HUMAN]	17.4404	16.43	2	4	39.208	P13639
B3KSI4	Uncharacterized protein OS=Homo sapiens GN=TKT PE=2 SV=1 - [B3KSI4_HUMAN]	15.0772	14.44	6	6	58.9443	P54136	Arginine--tRNA ligase, cytoplasmic OS=Homo sapiens GN=RARS PE=1 SV=2 - [SYRC_HUMAN]	18.7451	16.82	6	10	75.3309	F8VZJ2	Nascent polypeptide-associated complex alpha subunit OS=Homo sapiens GN=NACA PE=4 SV=1 - [F8VZJ2_HUMAN]	13.317	41.91	5	4	15.0068	F2Z2J9	Phosphoglycerate mutase OS=Homo sapiens PE=3 SV=1 - [F2Z2J9_HUMAN]	19.728	31.5	4	6	28.8318	P11177	Pyruvate dehydrogenase E1 component subunit beta, mitochondrial OS=Homo sapiens GN=PDHB PE=1 SV=3 - [ODPB_HUMAN]	18.1044	25.91	4	7	39.208	Q9BSQ6	RPL13A protein (Fragment) OS=Homo sapiens GN=RPL13A PE=2 SV=2 - [Q9BSQ6_HUMAN]	32.4483	29.35	8	7	23.3603	Q5LJA0	60 kDa SS-A/Ro ribonucleoprotein OS=Homo sapiens GN=TROVE2 PE=4 SV=1 - [Q5LJA0_HUMAN]	17.3075	11.24	3	5	59.2317	Q14677
P25685	DnaJ homolog subfamily B member 1 OS=Homo sapiens GN=DNAJB1 PE=1 SV=4 - [DNJB1_HUMAN]	14.9376	23.24	2	6	38.0204	B4DMB5	cDNA FLJ60075, highly similar to CTP synthase 1 (EC 6.3.4.2) OS=Homo sapiens PE=2 SV=1 - [B4DMB5_HUMAN]	18.7122	15.69	6	7	55.9146	Q66K25	SAMD4B protein OS=Homo sapiens GN=SAMD4B PE=2 SV=1 - [Q66K25_HUMAN]	13.1972	7.23	2	3	72.4559	Q5CAQ5	Tumor rejection antigen (Gp96) 1 OS=Homo sapiens GN=TRA1 PE=2 SV=1 - [Q5CAQ5_HUMAN]	19.6805	10.47	2	8	92.2823	P62333	26S protease regulatory subunit 10B OS=Homo sapiens GN=PSMC6 PE=1 SV=1 - [PRS10_HUMAN]	18.0574	21.34	4	7	44.1451	B4DY09	cDNA FLJ51660, highly similar to Interleukin enhancer-binding factor 2 OS=Homo sapiens PE=2 SV=1 - [B4DY09_HUMAN]	32.4215	20.74	4	6	38.8862	A8K486	Peptidyl-prolyl cis-trans isomerase OS=Homo sapiens PE=2 SV=1 - [A8K486_HUMAN]	17.0907	30.91	8	5	18.0018	B5BU72
H0YH87	Ataxin 2 (Fragment) OS=Homo sapiens GN=ATXN2 PE=4 SV=1 - [H0YH87_HUMAN]	14.8467	6.11	8	4	98.0546	B7Z6M1	Plastin 3 OS=Homo sapiens GN=PLS3 PE=2 SV=1 - [B7Z6M1_HUMAN]	18.435	15.56	17	8	65.5908	Q96KK5	Histone H2A type 1-H OS=Homo sapiens GN=HIST1H2AH PE=1 SV=3 - [H2A1H_HUMAN]	13.1494	27.34	11	3	13.8978	P31942-3	Isoform 3 of Heterogeneous nuclear ribonucleoprotein H3 OS=Homo sapiens GN=HNRNPH3 - [HNRH3_HUMAN]	19.6746	21.21	4	4	31.5054	B7Z4V2	cDNA FLJ51907, highly similar to Stress-70 protein, mitochondrial OS=Homo sapiens PE=2 SV=1 - [B7Z4V2_HUMAN]	17.9474	15.19	7	7	72.3561	B1ANR0	Poly(A) binding protein, cytoplasmic 4 (Inducible form), isoform CRA_e OS=Homo sapiens GN=PABPC4 PE=4 SV=1 - [B1ANR0_HUMAN]	32.3595	14.96	13	8	67.9279	B5BU99	High glucose-regulated protein 8 OS=Homo sapiens GN=YTHDF2 PE=2 SV=1 - [B5BU99_HUMAN]	16.9413	12.98	2	5	61.2822	P80723
F8W842	CREB regulated transcription coactivator 3 OS=Homo sapiens GN=CRTC3 PE=4 SV=1 - [F8W842_HUMAN]	14.7399	10.82	3	4	62.8643	E9PBS1	Phosphoribosylaminoimidazole carboxylase, phosphoribosylaminoimidazole succinocarboxamide synthetase (Fragment) OS=Homo sapiens GN=PAICS PE=4 SV=1 - [E9PBS1_HUMAN]	18.272	14.53	5	4	45.6224	P62263	40S ribosomal protein S14 OS=Homo sapiens GN=RPS14 PE=1 SV=3 - [RS14_HUMAN]	13.1107	34.44	1	4	16.2625	P29361	14-3-3 protein zeta/delta OS=Ovis aries GN=YWHAZ PE=1 SV=1 - [1433Z_SHEEP]	19.6417	29.39	4	7	27.8388	Q9Y263	Phospholipase A-2-activating protein OS=Homo sapiens GN=PLAA PE=1 SV=2 - [PLAP_HUMAN]	17.9065	9.31	4	7	87.1014	B3KTJ9	cDNA FLJ38393 fis, clone FEBRA2007212 OS=Homo sapiens PE=2 SV=1 - [B3KTJ9_HUMAN]	32.1646	10.94	10	9	102.866	P14618	Pyruvate kinase isozymes M1/M2 OS=Homo sapiens GN=PKM PE=1 SV=4 - [KPYM_HUMAN]	16.8192	15.82	8	7	57.9	E7ETK0
B4DN87	Serpin peptidase inhibitor, clade H (heat shock protein 47), member 1, (collagen binding protein 1) OS=Homo sapiens GN=SERPINH1 PE=2 SV=1 - [B4DN87_HUMAN]	14.7236	12.85	3	4	44.1761	B7Z8A7	cDNA FLJ53686, highly similar to Annexin A6 OS=Homo sapiens PE=2 SV=1 - [B7Z8A7_HUMAN]	18.1454	13.88	13	8	72.3479	P49757-4	Isoform 4 of Protein numb homolog OS=Homo sapiens GN=NUMB - [NUMB_HUMAN]	13.0921	9.63	5	4	64.4862	A8K7W3	cDNA FLJ75780, highly similar to Homo sapiens SGT1, suppressor of G2 allele of SKP1 (SUGT1), mRNA OS=Homo sapiens PE=2 SV=1 - [A8K7W3_HUMAN]	19.4109	22.22	4	6	37.8099	P35998	26S protease regulatory subunit 7 OS=Homo sapiens GN=PSMC2 PE=1 SV=3 - [PRS7_HUMAN]	17.8703	18.71	5	8	48.6031	P31689	DnaJ homolog subfamily A member 1 OS=Homo sapiens GN=DNAJA1 PE=1 SV=2 - [DNJA1_HUMAN]	32.1567	23.17	4	8	44.8395	Q9BSQ6	RPL13A protein (Fragment) OS=Homo sapiens GN=RPL13A PE=2 SV=2 - [Q9BSQ6_HUMAN]	16.7937	22.39	8	6	23.3603	P62826
P42677	40S ribosomal protein S27 OS=Homo sapiens GN=RPS27 PE=1 SV=3 - [RS27_HUMAN]	14.703	39.29	1	4	9.45484	O15260-2	Isoform 2 of Surfeit locus protein 4 OS=Homo sapiens GN=SURF4 - [SURF4_HUMAN]	18.1394	30.19	10	4	17.9581	Q5IST6	Peroxiredoxin 1 (Fragment) OS=Macaca fascicularis PE=2 SV=1 - [Q5IST6_MACFA]	13.0099	30.85	2	5	20.8527	F5H6W1	Eukaryotic translation initiation factor 2B, subunit 4 delta, 67kDa OS=Homo sapiens GN=EIF2B4 PE=3 SV=1 - [F5H6W1_HUMAN]	19.377	16.73	3	6	57.4602	Q2TAM5	RELA protein OS=Homo sapiens GN=RELA PE=2 SV=1 - [Q2TAM5_HUMAN]	17.8121	28.12	11	8	42.8416	Q9NTZ6	RNA-binding protein 12 OS=Homo sapiens GN=RBM12 PE=1 SV=1 - [RBM12_HUMAN]	32.1337	14.16	7	11	97.3334	K7ESI9	Dynamin-2 OS=Homo sapiens GN=DNM2 PE=3 SV=1 - [K7ESI9_HUMAN]	16.7592	8.17	13	6	97.9161	P61254
P19838	Nuclear factor NF-kappa-B p105 subunit OS=Homo sapiens GN=NFKB1 PE=1 SV=2 - [NFKB1_HUMAN]	14.6385	6.1	4	6	105.29	H0Y4R1	IMP (inosine 5'-monophosphate) dehydrogenase 2 (Fragment) OS=Homo sapiens GN=IMPDH2 PE=4 SV=1 - [H0Y4R1_HUMAN]	17.9637	15.96	8	6	51.0352	Q12906-5	Isoform 5 of Interleukin enhancer-binding factor 3 OS=Homo sapiens GN=ILF3 - [ILF3_HUMAN]	12.9655	7.83	12	4	74.5603	O95373	Importin-7 OS=Homo sapiens GN=IPO7 PE=1 SV=1 - [IPO7_HUMAN]	19.3627	8.77	1	7	119.44	B4DZF1	cDNA FLJ56541, highly similar to Ubiquilin-2 OS=Homo sapiens PE=2 SV=1 - [B4DZF1_HUMAN]	17.5927	14.06	3	5	54.9651	E7ETK0	40S ribosomal protein S24 OS=Homo sapiens GN=RPS24 PE=2 SV=1 - [E7ETK0_HUMAN]	31.9587	29.77	2	4	15.1873	B4DZF1	cDNA FLJ56541, highly similar to Ubiquilin-2 OS=Homo sapiens PE=2 SV=1 - [B4DZF1_HUMAN]	16.7284	11.13	3	4	54.9651	G3V576
Q14444-2	Isoform 2 of Caprin-1 OS=Homo sapiens GN=CAPRIN1 - [CAPR1_HUMAN]	14.5995	8.79	2	7	76.8143	P62979	Ubiquitin-40S ribosomal protein S27a OS=Homo sapiens GN=RPS27A PE=1 SV=2 - [RS27A_HUMAN]	17.957	35.9	30	5	17.9535	P60953	Cell division control protein 42 homolog OS=Homo sapiens GN=CDC42 PE=1 SV=2 - [CDC42_HUMAN]	12.5948	19.9	5	3	21.245	P43686-2	Isoform 2 of 26S protease regulatory subunit 6B OS=Homo sapiens GN=PSMC4 - [PRS6B_HUMAN]	19.2928	10.08	2	3	43.4805	Q5T4L4	40S ribosomal protein S27 OS=Homo sapiens GN=RPS27 PE=2 SV=1 - [Q5T4L4_HUMAN]	17.5844	40.91	3	4	7.35166	A8K897	cDNA FLJ78686, highly similar to Homo sapiens nucleoporin 93kDa (NUP93), mRNA OS=Homo sapiens PE=2 SV=1 - [A8K897_HUMAN]	31.7123	13.68	10	9	93.3236	P39023	60S ribosomal protein L3 OS=Homo sapiens GN=RPL3 PE=1 SV=2 - [RL3_HUMAN]	16.6404	16.63	13	7	46.0798	P49327
P13639	Elongation factor 2 OS=Homo sapiens GN=EEF2 PE=1 SV=4 - [EF2_HUMAN]	14.5959	9.56	1	7	95.277	Q5CAQ5	Tumor rejection antigen (Gp96) 1 OS=Homo sapiens GN=TRA1 PE=2 SV=1 - [Q5CAQ5_HUMAN]	17.9072	9.85	11	7	92.2823	Q15654	Thyroid receptor-interacting protein 6 OS=Homo sapiens GN=TRIP6 PE=1 SV=3 - [TRIP6_HUMAN]	12.5697	11.76	1	4	50.2555	P63244	Guanine nucleotide-binding protein subunit beta-2-like 1 OS=Homo sapiens GN=GNB2L1 PE=1 SV=3 - [GBLP_HUMAN]	19.1148	24.61	1	7	35.0546	P54136	Arginine--tRNA ligase, cytoplasmic OS=Homo sapiens GN=RARS PE=1 SV=2 - [SYRC_HUMAN]	17.5018	14.09	3	8	75.3309	A8K6V3	cDNA FLJ78677, highly similar to Homo sapiens splicing factor 3b, subunit 3, 130kDa (SF3B3), mRNA OS=Homo sapiens PE=2 SV=1 - [A8K6V3_HUMAN]	31.5376	7.64	4	8	135.493	P13489	Ribonuclease inhibitor OS=Homo sapiens GN=RNH1 PE=1 SV=2 - [RINI_HUMAN]	16.4686	15.18	8	5	49.9411	B4E190
Q99567	Nuclear pore complex protein Nup88 OS=Homo sapiens GN=NUP88 PE=1 SV=2 - [NUP88_HUMAN]	14.4717	9.99	1	6	83.4888	Q1KMD3	Heterogeneous nuclear ribonucleoprotein U-like protein 2 OS=Homo sapiens GN=HNRNPUL2 PE=1 SV=1 - [HNRL2_HUMAN]	17.896	12.72	1	8	85.0522	O15260-2	Isoform 2 of Surfeit locus protein 4 OS=Homo sapiens GN=SURF4 - [SURF4_HUMAN]	12.5168	24.53	6	3	17.9581	Q15365	Poly(rC)-binding protein 1 OS=Homo sapiens GN=PCBP1 PE=1 SV=2 - [PCBP1_HUMAN]	19.04	27.53	1	8	37.4739	G3V0E8	Poly(RC) binding protein 2, isoform CRA_f OS=Homo sapiens GN=PCBP2 PE=4 SV=1 - [G3V0E8_HUMAN]	17.4635	24.21	17	6	33.4753	A8K5T7	cDNA FLJ75365, highly similar to Homo sapiens SUGT1B (SUGT1) mRNA OS=Homo sapiens PE=2 SV=1 - [A8K5T7_HUMAN]	31.4562	27.67	6	8	41.0265	O14980	Exportin-1 OS=Homo sapiens GN=XPO1 PE=1 SV=1 - [XPO1_HUMAN]	16.1962	6.82	4	6	123.306	P62851
Q3KQU3-2	Isoform 2 of MAP7 domain-containing protein 1 OS=Homo sapiens GN=MAP7D1 - [MA7D1_HUMAN]	14.4437	5.35	4	4	88.673	A8K6Q8	cDNA FLJ75881, highly similar to Homo sapiens transferrin receptor (p90, CD71) (TFRC), mRNA OS=Homo sapiens PE=2 SV=1 - [A8K6Q8_HUMAN]	17.7802	11.71	6	7	84.8199	P17858	6-phosphofructokinase, liver type OS=Homo sapiens GN=PFKL PE=1 SV=6 - [K6PL_HUMAN]	12.4733	6.92	1	2	84.9642	E7EWF1	Ribosomal protein L4 OS=Homo sapiens GN=RPL4 PE=4 SV=1 - [E7EWF1_HUMAN]	18.8625	21.92	4	7	45.47	D3YTB1	60S ribosomal protein L32 (Fragment) OS=Homo sapiens GN=RPL32 PE=2 SV=1 - [D3YTB1_HUMAN]	17.4523	27.82	3	5	15.6067	P62805	Histone H4 OS=Homo sapiens GN=HIST1H4A PE=1 SV=2 - [H4_HUMAN]	31.4279	50.49	3	5	11.3604	P35998	26S protease regulatory subunit 7 OS=Homo sapiens GN=PSMC2 PE=1 SV=3 - [PRS7_HUMAN]	16.162	17.09	5	7	48.6031	B4DHC4
O00425	Insulin-like growth factor 2 mRNA-binding protein 3 OS=Homo sapiens GN=IGF2BP3 PE=1 SV=2 - [IF2B3_HUMAN]	14.4304	13.82	1	6	63.6656	Q05CK9	SYNCRIP protein (Fragment) OS=Homo sapiens GN=SYNCRIP PE=2 SV=1 - [Q05CK9_HUMAN]	17.7515	15.89	13	6	50.6189	E9PBV3	Suprabasin OS=Homo sapiens GN=SBSN PE=4 SV=1 - [E9PBV3_HUMAN]	12.4485	15.25	1	2	60.5046	H0YHC3	Nucleosome assembly protein 1-like 1 (Fragment) OS=Homo sapiens GN=NAP1L1 PE=4 SV=1 - [H0YHC3_HUMAN]	18.6486	25.76	15	5	23.4028	P39019	40S ribosomal protein S19 OS=Homo sapiens GN=RPS19 PE=1 SV=2 - [RS19_HUMAN]	17.3759	44.14	6	6	16.0505	Q8WX93	Palladin OS=Homo sapiens GN=PALLD PE=1 SV=3 - [PALLD_HUMAN]	31.3071	7.66	5	10	150.47	Q4ZG57	Putative uncharacterized protein MCM6 (Fragment) OS=Homo sapiens GN=MCM6 PE=2 SV=1 - [Q4ZG57_HUMAN]	16.1354	10.45	3	7	88.8903	Q92783
E9PLD0	RAB1B, member RAS oncogene family OS=Homo sapiens GN=RAB1B PE=3 SV=1 - [E9PLD0_HUMAN]	14.3881	34.91	3	4	18.4714	F8W181	60S ribosomal protein L6 (Fragment) OS=Homo sapiens GN=RPL6 PE=3 SV=1 - [F8W181_HUMAN]	17.7487	21.68	9	4	25.8758	E9PPR1	Eukaryotic translation elongation factor 1 delta (guanine nucleotide exchange protein) (Fragment) OS=Homo sapiens GN=EEF1D PE=4 SV=1 - [E9PPR1_HUMAN]	12.3858	30.72	16	4	18.146	P62263	40S ribosomal protein S14 OS=Homo sapiens GN=RPS14 PE=1 SV=3 - [RS14_HUMAN]	18.641	34.44	1	4	16.2625	I3L3P7	40S ribosomal protein S15a OS=Homo sapiens GN=RPS15A PE=2 SV=1 - [I3L3P7_HUMAN]	17.3742	56	8	6	11.4702	Q9NZB2	Constitutive coactivator of PPAR-gamma-like protein 1 OS=Homo sapiens GN=FAM120A PE=1 SV=2 - [F120A_HUMAN]	31.2079	10.02	2	8	121.811	P62263	40S ribosomal protein S14 OS=Homo sapiens GN=RPS14 PE=1 SV=3 - [RS14_HUMAN]	16.1189	29.14	3	4	16.2625	P63173
B3KTM6	Ribosomal protein L5, isoform CRA_b OS=Homo sapiens GN=RPL5 PE=2 SV=1 - [B3KTM6_HUMAN]	14.3395	21.86	3	4	28.0262	A8K2Y2	cDNA FLJ78120, highly similar to Homo sapiens eukaryotic translation initiation factor 2, subunit 3 gamma, 52kDa (EIF2S3), mRNA OS=Homo sapiens PE=2 SV=1 - [A8K2Y2_HUMAN]	17.7343	18.86	7	7	51.0782	Q86TL9	DnaJ (Hsp40) homolog, subfamily A, member 1, isoform CRA_b OS=Homo sapiens GN=DNAJA1 PE=2 SV=1 - [Q86TL9_HUMAN]	12.3223	13.29	2	4	37.0208	B4DRD7	Poly(rC) binding protein 2 OS=Homo sapiens GN=PCBP2 PE=2 SV=1 - [B4DRD7_HUMAN]	18.6071	29.79	6	7	29.7182	Q9NTZ6	RNA-binding protein 12 OS=Homo sapiens GN=RBM12 PE=1 SV=1 - [RBM12_HUMAN]	17.3352	11.91	4	9	97.3334	B5BU24	14-3-3 protein beta/alpha OS=Homo sapiens GN=YWHAB PE=2 SV=1 - [B5BU24_HUMAN]	31.1506	32.11	10	8	28.0948	A8K3Q9	cDNA FLJ76611, highly similar to Homo sapiens ribosomal protein L14 (RPL14), mRNA OS=Homo sapiens PE=2 SV=1 - [A8K3Q9_HUMAN]	16.0226	21.76	1	4	23.44	P62750
Q7Z427	Putative MAPK activating protein OS=Homo sapiens PE=2 SV=1 - [Q7Z427_HUMAN]	14.284	12.29	4	3	38.6797	H0Y9V9	Ribosomal protein L9 (Fragment) OS=Homo sapiens GN=RPL9 PE=4 SV=1 - [H0Y9V9_HUMAN]	17.7256	20.63	9	4	21.5557	B7Z871	cDNA FLJ50930, highly similar to Lipoma-preferred partner OS=Homo sapiens PE=2 SV=1 - [B7Z871_HUMAN]	12.3111	13.81	3	4	48.4852	Q96DH6-2	Isoform 2 of RNA-binding protein Musashi homolog 2 OS=Homo sapiens GN=MSI2 - [MSI2H_HUMAN]	18.4912	27.89	3	5	28.4021	P49327	Fatty acid synthase OS=Homo sapiens GN=FASN PE=1 SV=3 - [FAS_HUMAN]	17.3211	2.95	1	6	273.254	F8W7C6	60S ribosomal protein L10 OS=Homo sapiens GN=RPL10 PE=2 SV=1 - [F8W7C6_HUMAN]	31.0348	33.13	6	6	18.5797	B7ZW70	LOC727761 protein OS=Homo sapiens GN=LOC727761 PE=2 SV=1 - [B7ZW70_HUMAN]	16.0215	40.43	7	7	21.051	C9J9K3
G3V576	Uncharacterized protein OS=Homo sapiens GN=HNRNPC PE=4 SV=1 - [G3V576_HUMAN]	14.266	21.65	12	6	25.2411	Q96DH6-2	Isoform 2 of RNA-binding protein Musashi homolog 2 OS=Homo sapiens GN=MSI2 - [MSI2H_HUMAN]	17.7241	27.09	5	5	28.4021	G8JL97	Dynamin 1-like OS=Homo sapiens GN=DNM1L PE=4 SV=1 - [G8JL97_HUMAN]	12.1293	7.13	14	3	64.137	B4DNN4	Ribonucleoside-diphosphate reductase OS=Homo sapiens PE=2 SV=1 - [B4DNN4_HUMAN]	18.4176	10.76	3	7	86.3966	P35579	Myosin-9 OS=Homo sapiens GN=MYH9 PE=1 SV=4 - [MYH9_HUMAN]	17.3069	4.18	5	6	226.392	Q92900	Regulator of nonsense transcripts 1 OS=Homo sapiens GN=UPF1 PE=1 SV=2 - [RENT1_HUMAN]	30.9835	9.65	3	9	124.267	C9J9K3	40S ribosomal protein SA (Fragment) OS=Homo sapiens GN=RPSA PE=2 SV=1 - [C9J9K3_HUMAN]	15.9423	23.86	4	5	29.487	Q96HX3
B1AKP7	TAR DNA binding protein OS=Homo sapiens GN=TARDBP PE=4 SV=1 - [B1AKP7_HUMAN]	14.2657	14.92	4	5	33.4408	O60664	Perilipin-3 OS=Homo sapiens GN=PLIN3 PE=1 SV=3 - [PLIN3_HUMAN]	17.7124	15.21	3	5	47.0459	F8VSC5	SCY1-like 2 (S. cerevisiae) (Fragment) OS=Homo sapiens GN=SCYL2 PE=4 SV=1 - [F8VSC5_HUMAN]	12.1261	7.64	2	4	77.0044	H0Y9V9	Ribosomal protein L9 (Fragment) OS=Homo sapiens GN=RPL9 PE=4 SV=1 - [H0Y9V9_HUMAN]	18.3429	26.46	3	5	21.5557	P48444	Coatomer subunit delta OS=Homo sapiens GN=ARCN1 PE=1 SV=1 - [COPD_HUMAN]	17.2194	13.11	4	6	57.1741	E7ERW8	Protein diaphanous homolog 1 OS=Homo sapiens GN=DIAPH1 PE=2 SV=1 - [E7ERW8_HUMAN]	30.9344	11.69	13	13	135.26	Q5HYM2	Putative uncharacterized protein DKFZp686O2462 (Fragment) OS=Homo sapiens GN=DKFZp686O2462 PE=2 SV=1 - [Q5HYM2_HUMAN]	15.9359	12.62	3	6	71.9998	E7EWI9
A8MWI8	Chaperonin containing TCP1, subunit 7 (eta) OS=Homo sapiens GN=CCT7 PE=2 SV=1 - [A8MWI8_HUMAN]	14.2194	16.22	10	4	37.4749	B3KWY7	cDNA FLJ44270 fis, clone TLIVE2008229, highly similar to SIGNAL RECOGNITION PARTICLE 68 kDa PROTEIN OS=Homo sapiens PE=2 SV=1 - [B3KWY7_HUMAN]	17.5737	14.26	12	7	66.068	B4DN87	Serpin peptidase inhibitor, clade H (heat shock protein 47), member 1, (collagen binding protein 1) OS=Homo sapiens GN=SERPINH1 PE=2 SV=1 - [B4DN87_HUMAN]	12.1179	13.6	3	4	44.1761	B7Z9W6	cDNA, FLJ78980, highly similar to DnaJ homolog subfamily C member 7 OS=Homo sapiens PE=2 SV=1 - [B7Z9W6_HUMAN]	18.1728	16.44	5	6	50.0348	Q15645	Pachytene checkpoint protein 2 homolog OS=Homo sapiens GN=TRIP13 PE=1 SV=2 - [PCH2_HUMAN]	17.1458	18.06	2	6	48.5205	J3QQT2	60S ribosomal protein L17 (Fragment) OS=Homo sapiens GN=RPL17 PE=3 SV=1 - [J3QQT2_HUMAN]	30.9223	30.41	7	6	19.7734	P26639	Threonine--tRNA ligase, cytoplasmic OS=Homo sapiens GN=TARS PE=1 SV=3 - [SYTC_HUMAN]	15.9298	12.45	11	9	83.3819	B4DR55
Q7Z355	Putative uncharacterized protein DKFZp686L17145 OS=Homo sapiens GN=DKFZp686L17145 PE=2 SV=1 - [Q7Z355_HUMAN]	14.2047	5.47	5	6	131.622	P62280	40S ribosomal protein S11 OS=Homo sapiens GN=RPS11 PE=1 SV=3 - [RS11_HUMAN]	17.5154	34.81	1	7	18.419	B4DUR8	Chaperonin containing TCP1, subunit 3 (gamma) OS=Homo sapiens GN=CCT3 PE=2 SV=1 - [B4DUR8_HUMAN]	12.0334	11.6	8	5	55.6387	P53396-2	Isoform 2 of ATP-citrate synthase OS=Homo sapiens GN=ACLY - [ACLY_HUMAN]	18.1163	9.62	6	8	119.695	Q5LJA0	60 kDa SS-A/Ro ribonucleoprotein OS=Homo sapiens GN=TROVE2 PE=4 SV=1 - [Q5LJA0_HUMAN]	17.0797	14.1	4	6	59.2317	P17655	Calpain-2 catalytic subunit OS=Homo sapiens GN=CAPN2 PE=1 SV=6 - [CAN2_HUMAN]	30.6725	16.29	4	11	79.9448	Q8WX93	Palladin OS=Homo sapiens GN=PALLD PE=1 SV=3 - [PALLD_HUMAN]	15.8772	5.28	5	6	150.47	G3V1B3
Q5ISS5	Ribosomal protein S5 (Fragment) OS=Macaca fascicularis PE=2 SV=1 - [Q5ISS5_MACFA]	14.1972	13.77	3	2	18.6808	F8VR82	Serine/threonine-protein phosphatase OS=Homo sapiens GN=PPP1CC PE=3 SV=1 - [F8VR82_HUMAN]	17.3773	20.74	25	5	30.9666	Q5T4L4	Ribosomal protein S27 OS=Homo sapiens GN=RPS27 PE=4 SV=1 - [Q5T4L4_HUMAN]	11.9912	40.91	2	3	7.35166	P46783	40S ribosomal protein S10 OS=Homo sapiens GN=RPS10 PE=1 SV=1 - [RS10_HUMAN]	18.0683	23.64	1	4	18.8859	B4DFK9	cDNA FLJ57964, highly similar to Heterogeneous nuclear ribonucleoprotein H' OS=Homo sapiens PE=2 SV=1 - [B4DFK9_HUMAN]	16.9896	14.6	7	5	44.4088	M0R210	40S ribosomal protein S16 OS=Homo sapiens GN=RPS16 PE=3 SV=1 - [M0R210_HUMAN]	30.5445	46.51	6	7	14.41	B3KPS9	cDNA FLJ32140 fis, clone PLACE5000058, highly similar to Importin-4 OS=Homo sapiens PE=2 SV=1 - [B3KPS9_HUMAN]	15.8548	7.51	13	5	103.167	A4QN19
B4DYC6	cDNA FLJ60958, highly similar to Homo sapiens SGT1, suppressor of G2 allele of SKP1 (SUGT1), mRNA OS=Homo sapiens PE=2 SV=1 - [B4DYC6_HUMAN]	14.1711	18.41	6	4	31.669	Q9Y263	Phospholipase A-2-activating protein OS=Homo sapiens GN=PLAA PE=1 SV=2 - [PLAP_HUMAN]	17.3548	7.42	4	4	87.1014	Q2TSD2	Aging-associated gene 7 protein OS=Homo sapiens PE=2 SV=1 - [Q2TSD2_HUMAN]	11.946	13.37	3	4	41.4361	B2R6J4	cDNA, FLJ92975, highly similar to Homo sapiens nucleosome assembly protein 1-like 4 (NAP1L4), mRNA OS=Homo sapiens PE=2 SV=1 - [B2R6J4_HUMAN]	17.9063	17.6	8	6	42.7689	P26641	Elongation factor 1-gamma OS=Homo sapiens GN=EEF1G PE=1 SV=3 - [EF1G_HUMAN]	16.9444	15.33	5	6	50.0871	P62263	40S ribosomal protein S14 OS=Homo sapiens GN=RPS14 PE=1 SV=3 - [RS14_HUMAN]	30.5444	35.76	3	5	16.2625	P11498	Pyruvate carboxylase, mitochondrial OS=Homo sapiens GN=PC PE=1 SV=2 - [PYC_HUMAN]	15.8283	9	3	8	129.551	C9JB50
Q96H99	Cortactin OS=Homo sapiens GN=CTTN PE=2 SV=1 - [Q96H99_HUMAN]	14.161	12.87	4	5	57.4315	E9PBV3	Suprabasin OS=Homo sapiens GN=SBSN PE=4 SV=1 - [E9PBV3_HUMAN]	17.2148	18.31	1	3	60.5046	P19838	Nuclear factor NF-kappa-B p105 subunit OS=Homo sapiens GN=NFKB1 PE=1 SV=2 - [NFKB1_HUMAN]	11.9144	5.37	4	4	105.29	D6RIU4	Lectin, mannose-binding 2 (Fragment) OS=Homo sapiens GN=LMAN2 PE=4 SV=1 - [D6RIU4_HUMAN]	17.8724	36.46	6	6	21.9336	P62805	Histone H4 OS=Homo sapiens GN=HIST1H4A PE=1 SV=2 - [H4_HUMAN]	16.8051	51.46	3	6	11.3604	P27824	Calnexin OS=Homo sapiens GN=CANX PE=1 SV=2 - [CALX_HUMAN]	30.4943	12.67	13	7	67.5259	P62424	60S ribosomal protein L7a OS=Homo sapiens GN=RPL7A PE=1 SV=2 - [RL7A_HUMAN]	15.7969	16.92	4	4	29.977	H0YEH2
Q9UNF1	Melanoma-associated antigen D2 OS=Homo sapiens GN=MAGED2 PE=1 SV=2 - [MAGD2_HUMAN]	14.1074	10.89	1	6	64.9144	A8K492	cDNA FLJ76789, highly similar to Homo sapiens methionine-tRNA synthetase (MARS), mRNA OS=Homo sapiens PE=2 SV=1 - [A8K492_HUMAN]	17.1711	8.33	14	5	101.08	Q5U7I5	Transthyretin OS=Pan troglodytes GN=TTR PE=2 SV=1 - [TTHY_PANTR]	11.8192	9.52	1	2	15.8621	O14980	Exportin-1 OS=Homo sapiens GN=XPO1 PE=1 SV=1 - [XPO1_HUMAN]	17.8401	7	1	8	123.306	P55327	Tumor protein D52 OS=Homo sapiens GN=TPD52 PE=1 SV=2 - [TPD52_HUMAN]	16.7118	22.77	9	4	24.3122	K7EJT8	AP-2 complex subunit beta OS=Homo sapiens GN=AP2B1 PE=4 SV=1 - [K7EJT8_HUMAN]	30.3477	12.81	13	11	101.268	B4DKN9	cDNA FLJ57740, highly similar to Transforming protein RhoA OS=Homo sapiens PE=2 SV=1 - [B4DKN9_HUMAN]	15.6914	27.75	11	5	19.557	Q15323
B4E2D6	cDNA FLJ61066, highly similar to Segment polarity protein dishevelled homolog DVL-2 OS=Homo sapiens PE=2 SV=1 - [B4E2D6_HUMAN]	14.0042	8.37	3	4	76.9826	Q9UHX1-4	Isoform 4 of Poly(U)-binding-splicing factor PUF60 OS=Homo sapiens GN=PUF60 - [PUF60_HUMAN]	17.1701	11.82	11	4	53.9907	A8MV37	SEC13 homolog (S. cerevisiae) OS=Homo sapiens GN=SEC13 PE=4 SV=1 - [A8MV37_HUMAN]	11.7926	14.94	4	4	33.9904	F8W783	Microtubule-associated protein 7 OS=Homo sapiens GN=MAP7 PE=4 SV=1 - [F8W783_HUMAN]	17.795	13.89	14	8	72.3405	P26373	60S ribosomal protein L13 OS=Homo sapiens GN=RPL13 PE=1 SV=4 - [RL13_HUMAN]	16.6877	24.64	5	6	24.2465	E9PPJ0	Splicing factor 3B subunit 2 OS=Homo sapiens GN=SF3B2 PE=2 SV=1 - [E9PPJ0_HUMAN]	30.3203	8.77	8	7	98.1089	O95373	Importin-7 OS=Homo sapiens GN=IPO7 PE=1 SV=1 - [IPO7_HUMAN]	15.623	8.48	4	6	119.44	E5KQF5
O43399	Tumor protein D54 OS=Homo sapiens GN=TPD52L2 PE=1 SV=2 - [TPD54_HUMAN]	13.9491	24.27	3	4	22.2243	A8MZ77	Uncharacterized protein OS=Homo sapiens GN=BSG PE=2 SV=3 - [A8MZ77_HUMAN]	17.0936	20.78	7	3	16.5168	B7Z1G4	cDNA FLJ61601, highly similar to Inosine-5'-monophosphate dehydrogenase 2 (EC 1.1.1.205) OS=Homo sapiens PE=2 SV=1 - [B7Z1G4_HUMAN]	11.6439	11.48	4	4	38.9832	Q9Y6G9	Cytoplasmic dynein 1 light intermediate chain 1 OS=Homo sapiens GN=DYNC1LI1 PE=1 SV=3 - [DC1L1_HUMAN]	17.7897	17.4	1	6	56.544	P80723	Brain acid soluble protein 1 OS=Homo sapiens GN=BASP1 PE=1 SV=2 - [BASP1_HUMAN]	16.5194	40.09	1	6	22.68	Q9Y266	Nuclear migration protein nudC OS=Homo sapiens GN=NUDC PE=1 SV=1 - [NUDC_HUMAN]	30.2008	23.56	2	7	38.2191	P35241	Radixin OS=Homo sapiens GN=RDX PE=1 SV=1 - [RADI_HUMAN]	15.5781	10.46	15	6	68.5214	B3KNI2
Q96PK6	RNA-binding protein 14 OS=Homo sapiens GN=RBM14 PE=1 SV=2 - [RBM14_HUMAN]	13.9446	12.86	1	7	69.4489	Q5ISS9	Tyrosine 3-monooxygenase/tryptophan 5-monooxygenase activation protein theta isoform (Fragment) OS=Macaca fascicularis PE=2 SV=1 - [Q5ISS9_MACFA]	17.0765	26.69	19	6	26.6462	Q63HR1	Putative uncharacterized protein DKFZp686P17171 OS=Homo sapiens GN=DKFZp686P17171 PE=2 SV=1 - [Q63HR1_HUMAN]	11.5814	11.11	7	3	42.4153	B5MEH6	Zinc finger RNA binding protein OS=Homo sapiens GN=ZFR PE=4 SV=1 - [B5MEH6_HUMAN]	17.755	7.2	3	5	115.082	P11498	Pyruvate carboxylase, mitochondrial OS=Homo sapiens GN=PC PE=1 SV=2 - [PYC_HUMAN]	16.5138	8.06	3	7	129.551	M0QZC5	40S ribosomal protein S11 OS=Homo sapiens GN=RPS11 PE=4 SV=1 - [M0QZC5_HUMAN]	30.1689	55.08	4	9	13.9885	Q5T4L4	40S ribosomal protein S27 OS=Homo sapiens GN=RPS27 PE=2 SV=1 - [Q5T4L4_HUMAN]	15.5189	40.91	3	5	7.35166	P84085
B4E2E1	cDNA FLJ54322, highly similar to Protein transport protein Sec24B OS=Homo sapiens PE=2 SV=1 - [B4E2E1_HUMAN]	13.9337	6.11	5	4	96.1147	Q6FIG4	RAB1B protein OS=Homo sapiens GN=RAB1B PE=2 SV=1 - [Q6FIG4_HUMAN]	16.9344	34.83	70	5	22.1842	A6NCD2	Chaperonin containing TCP1, subunit 6A (zeta 1) OS=Homo sapiens GN=CCT6A PE=3 SV=1 - [A6NCD2_HUMAN]	11.5694	10.29	6	5	53.2551	P62847-2	Isoform 2 of 40S ribosomal protein S24 OS=Homo sapiens GN=RPS24 - [RS24_HUMAN]	17.5278	30	5	4	15.0592	B4DKN9	cDNA FLJ57740, highly similar to Transforming protein RhoA OS=Homo sapiens PE=2 SV=1 - [B4DKN9_HUMAN]	16.4887	34.1	11	6	19.557	E5RJ68	AP-3 complex subunit beta-1 OS=Homo sapiens GN=AP3B1 PE=2 SV=1 - [E5RJ68_HUMAN]	30.1118	9.76	5	9	116.122	Q14444	Caprin-1 OS=Homo sapiens GN=CAPRIN1 PE=1 SV=2 - [CAPR1_HUMAN]	15.4767	8.46	6	6	78.318	Q71RC2
B4E1V0	cDNA FLJ54839, highly similar to Lactotransferrin (EC 3.4.21.-) OS=Homo sapiens PE=2 SV=1 - [B4E1V0_HUMAN]	13.8968	17.67	15	4	33.0041	E9PF10	Nucleoporin 155kDa OS=Homo sapiens GN=NUP155 PE=4 SV=1 - [E9PF10_HUMAN]	16.6624	4.97	5	5	148	A8K0Q1	cDNA FLJ77001, highly similar to Homo sapiens ring finger protein 126 (RNF126), transcript variant 2, mRNA OS=Homo sapiens PE=2 SV=1 - [A8K0Q1_HUMAN]	11.5481	9.32	3	3	33.8883	Q7Z451	Adaptor-related protein complex 2, beta 1 subunit OS=Homo sapiens GN=AP2B1 PE=2 SV=1 - [Q7Z451_HUMAN]	17.5042	8.64	9	7	98.0557	Q13148	TAR DNA-binding protein 43 OS=Homo sapiens GN=TARDBP PE=1 SV=1 - [TADBP_HUMAN]	16.4152	12.32	7	5	44.7113	P54136	Arginine--tRNA ligase, cytoplasmic OS=Homo sapiens GN=RARS PE=1 SV=2 - [SYRC_HUMAN]	29.8568	12.27	3	7	75.3309	P05387	60S acidic ribosomal protein P2 OS=Homo sapiens GN=RPLP2 PE=1 SV=1 - [RLA2_HUMAN]	15.4026	40.87	1	3	11.6578	P30041
Q9H0D6-2	Isoform 2 of 5'-3' exoribonuclease 2 OS=Homo sapiens GN=XRN2 - [XRN2_HUMAN]	13.8847	10.07	4	8	99.8981	B2RA03	cDNA, FLJ94640, highly similar to Homo sapiens keratin 18 (KRT18), mRNA OS=Homo sapiens PE=2 SV=1 - [B2RA03_HUMAN]	16.6383	15.81	3	7	48.0005	B4E205	cDNA FLJ61651, highly similar to Protein transport protein Sec24A OS=Homo sapiens PE=2 SV=1 - [B4E205_HUMAN]	11.4691	5.02	2	2	96.2115	P31946-2	Isoform Short of 14-3-3 protein beta/alpha OS=Homo sapiens GN=YWHAB - [1433B_HUMAN]	17.3905	29.1	3	7	27.8327	O75396	Vesicle-trafficking protein SEC22b OS=Homo sapiens GN=SEC22B PE=1 SV=4 - [SC22B_HUMAN]	16.3567	24.19	1	4	24.5775	B4DX07	cDNA FLJ54077, highly similar to 26S proteasome non-ATPase regulatory subunit 2 OS=Homo sapiens PE=2 SV=1 - [B4DX07_HUMAN]	29.6853	12.98	10	9	85.5354	G3V576	Heterogeneous nuclear ribonucleoproteins C1/C2 OS=Homo sapiens GN=HNRNPC PE=4 SV=1 - [G3V576_HUMAN]	15.3753	26.84	27	5	25.2411	P62258
P05387	60S acidic ribosomal protein P2 OS=Homo sapiens GN=RPLP2 PE=1 SV=1 - [RLA2_HUMAN]	13.8679	25.22	1	4	11.6578	P31942-3	Isoform 3 of Heterogeneous nuclear ribonucleoprotein H3 OS=Homo sapiens GN=HNRNPH3 - [HNRH3_HUMAN]	16.6345	14.48	8	3	31.5054	P07737	Profilin-1 OS=Homo sapiens GN=PFN1 PE=1 SV=2 - [PROF1_HUMAN]	11.3288	35.71	1	4	15.0446	P62805	Histone H4 OS=Homo sapiens GN=HIST1H4A PE=1 SV=2 - [H4_HUMAN]	17.3843	51.46	1	6	11.3604	B7Z3V1	cDNA FLJ60077, highly similar to Sodium/potassium-transporting ATPase alpha-1 chain (EC 3.6.3.9) (Fragment) OS=Homo sapiens PE=2 SV=1 - [B7Z3V1_HUMAN]	16.3147	6.96	16	6	112.366	P31944	Caspase-14 OS=Homo sapiens GN=CASP14 PE=1 SV=2 - [CASPE_HUMAN]	29.5523	22.31	2	6	27.662	P60953	Cell division control protein 42 homolog OS=Homo sapiens GN=CDC42 PE=1 SV=2 - [CDC42_HUMAN]	15.3487	25.65	5	4	21.245	P35998
B4DUR8	Chaperonin containing TCP1, subunit 3 (gamma) OS=Homo sapiens GN=CCT3 PE=2 SV=1 - [B4DUR8_HUMAN]	13.7744	15	8	7	55.6387	O43684-2	Isoform 2 of Mitotic checkpoint protein BUB3 OS=Homo sapiens GN=BUB3 - [BUB3_HUMAN]	16.581	20.86	3	6	36.9311	P30050	60S ribosomal protein L12 OS=Homo sapiens GN=RPL12 PE=1 SV=1 - [RL12_HUMAN]	11.2755	28.48	2	3	17.8075	B4DY23	cDNA FLJ61188, highly similar to Basigin OS=Homo sapiens PE=2 SV=1 - [B4DY23_HUMAN]	17.3834	15.65	4	4	28.4143	O00148	ATP-dependent RNA helicase DDX39A OS=Homo sapiens GN=DDX39A PE=1 SV=2 - [DX39A_HUMAN]	16.2866	12.88	19	5	49.098	A8K134	cDNA FLJ75245, highly similar to Homo sapiens carbamoyl-phosphate synthetase 1, mitochondrial (CPS1), mRNA OS=Homo sapiens PE=2 SV=1 - [A8K134_HUMAN]	29.1118	7.47	10	9	164.764	Q5H909	Melanoma-associated antigen D2 OS=Homo sapiens GN=MAGED2 PE=2 SV=1 - [Q5H909_HUMAN]	15.3389	13.82	6	7	59.4888	M0QZC5
P13010	X-ray repair cross-complementing protein 5 OS=Homo sapiens GN=XRCC5 PE=1 SV=3 - [XRCC5_HUMAN]	13.7324	5.74	1	5	82.6523	O14979-3	Isoform 3 of Heterogeneous nuclear ribonucleoprotein D-like OS=Homo sapiens GN=HNRPDL - [HNRDL_HUMAN]	16.5574	23.36	17	5	27.1746	Q9UBV8	Peflin OS=Homo sapiens GN=PEF1 PE=1 SV=1 - [PEF1_HUMAN]	11.1247	14.79	1	4	30.3613	P61106	Ras-related protein Rab-14 OS=Homo sapiens GN=RAB14 PE=1 SV=4 - [RAB14_HUMAN]	16.9905	28.37	1	5	23.8819	P52597	Heterogeneous nuclear ribonucleoprotein F OS=Homo sapiens GN=HNRNPF PE=1 SV=3 - [HNRPF_HUMAN]	16.2372	17.35	2	6	45.6429	Q14677	Clathrin interactor 1 OS=Homo sapiens GN=CLINT1 PE=1 SV=1 - [EPN4_HUMAN]	28.9813	10.4	1	5	68.2158	B4E3I9	cDNA FLJ58234, highly similar to IkappaB kinase complex-associated protein OS=Homo sapiens PE=2 SV=1 - [B4E3I9_HUMAN]	15.3198	6.98	7	7	138.021	Q86X55
Q5R370	Calcyclin binding protein OS=Homo sapiens GN=CACYBP PE=2 SV=1 - [Q5R370_HUMAN]	13.6678	27.57	3	5	21.2149	P07195	L-lactate dehydrogenase B chain OS=Homo sapiens GN=LDHB PE=1 SV=2 - [LDHB_HUMAN]	16.4718	17.96	4	5	36.6151	Q92973-3	Isoform 3 of Transportin-1 OS=Homo sapiens GN=TNPO1 - [TNPO1_HUMAN]	11.0683	5.42	3	4	96.838	P62249	40S ribosomal protein S16 OS=Homo sapiens GN=RPS16 PE=1 SV=2 - [RS16_HUMAN]	16.7879	41.78	1	7	16.435	P31942	Heterogeneous nuclear ribonucleoprotein H3 OS=Homo sapiens GN=HNRNPH3 PE=1 SV=2 - [HNRH3_HUMAN]	16.2272	16.76	3	5	36.9031	F8VZJ2	Nascent polypeptide-associated complex subunit alpha OS=Homo sapiens GN=NACA PE=2 SV=1 - [F8VZJ2_HUMAN]	28.9539	40.44	8	4	15.0068	P62979	Ubiquitin-40S ribosomal protein S27a OS=Homo sapiens GN=RPS27A PE=1 SV=2 - [RS27A_HUMAN]	15.2517	38.46	45	5	17.9535	P07237
B3KXA2	cDNA FLJ45031 fis, clone BRAWH3018548, highly similar to Vinculin OS=Homo sapiens PE=2 SV=1 - [B3KXA2_HUMAN]	13.4737	7.46	4	6	110.237	Q96H99	Cortactin OS=Homo sapiens GN=CTTN PE=2 SV=1 - [Q96H99_HUMAN]	16.3717	10.92	11	5	57.4315	P84085	ADP-ribosylation factor 5 OS=Homo sapiens GN=ARF5 PE=1 SV=2 - [ARF5_HUMAN]	10.949	24.44	1	3	20.5166	F5GZ16	Proteasome (prosome, macropain) 26S subunit, non-ATPase, 2 OS=Homo sapiens GN=PSMD2 PE=4 SV=1 - [F5GZ16_HUMAN]	16.7731	9.78	4	8	99.2083	Q8NA80	cDNA FLJ35762 fis, clone TESTI2004793, moderately similar to Homo sapiens NY-REN-2 antigen mRNA OS=Homo sapiens PE=2 SV=1 - [Q8NA80_HUMAN]	16.2009	13.11	9	5	58.2732	K9J957	REG gamma-3 variant OS=Homo sapiens PE=2 SV=1 - [K9J957_HUMAN]	28.9412	25.97	10	6	26.8502	P62851	40S ribosomal protein S25 OS=Homo sapiens GN=RPS25 PE=1 SV=1 - [RS25_HUMAN]	15.1871	29.6	1	5	13.7337	P27348
P39019	40S ribosomal protein S19 OS=Homo sapiens GN=RPS19 PE=1 SV=2 - [RS19_HUMAN]	13.3466	29.66	2	5	16.0505	B1AHC7	Uncharacterized protein OS=Homo sapiens GN=XRCC6 PE=4 SV=1 - [B1AHC7_HUMAN]	16.2742	15.08	9	7	64.0351	B4E2D6	cDNA FLJ61066, highly similar to Segment polarity protein dishevelled homolog DVL-2 OS=Homo sapiens PE=2 SV=1 - [B4E2D6_HUMAN]	10.9478	7.67	3	4	76.9826	B2RBA6	cDNA, FLJ95407, highly similar to Homo sapiens MCM7 minichromosome maintenance deficient 7 (S. cerevisiae) (MCM7), mRNA OS=Homo sapiens PE=2 SV=1 - [B2RBA6_HUMAN]	16.721	11.13	2	7	81.2286	H3BQN4	Fructose-bisphosphate aldolase OS=Homo sapiens GN=ALDOA PE=2 SV=1 - [H3BQN4_HUMAN]	16.1601	19.11	9	6	39.3154	B4DK06	cDNA FLJ60610, highly similar to Dynamin-1 (EC 3.6.5.5) OS=Homo sapiens PE=2 SV=1 - [B4DK06_HUMAN]	28.7285	8.93	8	8	95.7682	C9JB50	60S ribosomal protein L28 OS=Homo sapiens GN=RPL28 PE=4 SV=1 - [C9JB50_HUMAN]	14.9696	47.83	7	5	7.88318	Q7Z427
E9PBS1	Phosphoribosylaminoimidazole carboxylase, phosphoribosylaminoimidazole succinocarboxamide synthetase (Fragment) OS=Homo sapiens GN=PAICS PE=4 SV=1 - [E9PBS1_HUMAN]	13.3293	10.41	2	3	45.6224	B4DKX4	cDNA FLJ58014, highly similar to Homo sapiens programmed cell death 4, transcript variant 1, mRNA OS=Homo sapiens PE=2 SV=1 - [B4DKX4_HUMAN]	16.2257	14.73	6	5	50.1974	C9JXB8	Ribosomal protein L24 OS=Homo sapiens GN=RPL24 PE=4 SV=1 - [C9JXB8_HUMAN]	10.944	32.23	3	4	14.3598	G3V576	Uncharacterized protein OS=Homo sapiens GN=HNRNPC PE=4 SV=1 - [G3V576_HUMAN]	16.6367	22.08	12	5	25.2411	Q96I60	6-phosphofructokinase (Fragment) OS=Homo sapiens GN=PFKM PE=2 SV=2 - [Q96I60_HUMAN]	16.1351	10.17	9	6	81.4914	Q0IIN1	Keratin 77 OS=Homo sapiens GN=KRT77 PE=2 SV=1 - [Q0IIN1_HUMAN]	28.5062	10.55	4	6	61.7644	P31689	DnaJ homolog subfamily A member 1 OS=Homo sapiens GN=DNAJA1 PE=1 SV=2 - [DNJA1_HUMAN]	14.9376	12.59	3	5	44.8395	M0R0F0
D6R9P3	Heterogeneous nuclear ribonucleoprotein A/B OS=Homo sapiens GN=HNRNPAB PE=4 SV=1 - [D6R9P3_HUMAN]	13.2756	16.07	7	4	30.284	P62820	Ras-related protein Rab-1A OS=Homo sapiens GN=RAB1A PE=1 SV=3 - [RAB1A_HUMAN]	16.2249	32.68	73	5	22.6634	Q92783-2	Isoform 2 of Signal transducing adapter molecule 1 OS=Homo sapiens GN=STAM - [STAM1_HUMAN]	10.8927	11.91	3	3	44.9432	Q13283	Ras GTPase-activating protein-binding protein 1 OS=Homo sapiens GN=G3BP1 PE=1 SV=1 - [G3BP1_HUMAN]	16.6132	16.52	3	6	52.1321	B5BUB1	RuvB-like 1 (Fragment) OS=Homo sapiens GN=RUVBL1 PE=2 SV=1 - [B5BUB1_HUMAN]	16.1279	13.16	6	4	50.1843	Q96CG1	ETF1 protein OS=Homo sapiens GN=ETF1 PE=2 SV=1 - [Q96CG1_HUMAN]	28.4618	20.3	4	8	45.4343	P27348	14-3-3 protein theta OS=Homo sapiens GN=YWHAQ PE=1 SV=1 - [1433T_HUMAN]	14.8767	18.78	9	5	27.7468	K7EIV0
Q01813	6-phosphofructokinase type C OS=Homo sapiens GN=PFKP PE=1 SV=2 - [K6PP_HUMAN]	13.2735	8.55	1	5	85.5415	B4DX55	cDNA FLJ58171, moderately similar to Melanoma-associated antigen D2 OS=Homo sapiens PE=2 SV=1 - [B4DX55_HUMAN]	16.1618	9.23	23	5	55.4662	P61006	Ras-related protein Rab-8A OS=Homo sapiens GN=RAB8A PE=1 SV=1 - [RAB8A_HUMAN]	10.8686	24.15	1	2	23.6532	Q92879	cDNA FLJ61559, highly similar to CUG triplet repeat RNA-binding protein 1 OS=Homo sapiens PE=2 SV=1 - [B4E2U5_HUMAN]	16.579	14.74	7	6	50.098	P62851	40S ribosomal protein S25 OS=Homo sapiens GN=RPS25 PE=1 SV=1 - [RS25_HUMAN]	16.0908	29.6	1	5	13.7337	Q59GL1	Synaptotagmin binding, cytoplasmic RNA interacting protein variant (Fragment) OS=Homo sapiens PE=2 SV=1 - [Q59GL1_HUMAN]	28.4134	14.42	7	8	59.5699	P61204	ADP-ribosylation factor 3 OS=Homo sapiens GN=ARF3 PE=1 SV=2 - [ARF3_HUMAN]	14.8565	27.62	9	4	20.5877	I3L3P7
P31946-2	Isoform Short of 14-3-3 protein beta/alpha OS=Homo sapiens GN=YWHAB - [1433B_HUMAN]	13.2581	20.49	3	5	27.8327	G5E9V1	TRK-fused OS=Homo sapiens GN=TFG PE=4 SV=1 - [G5E9V1_HUMAN]	16.0632	15.15	10	5	42.994	B4DDF4	cDNA FLJ52469, highly similar to Calponin-2 OS=Homo sapiens PE=2 SV=1 - [B4DDF4_HUMAN]	10.7529	14.09	5	3	32.5956	A8K2Y2	cDNA FLJ78120, highly similar to Homo sapiens eukaryotic translation initiation factor 2, subunit 3 gamma, 52kDa (EIF2S3), mRNA OS=Homo sapiens PE=2 SV=1 - [A8K2Y2_HUMAN]	16.5496	16.95	3	6	51.0782	B4DHE8	RNA-binding protein Musashi homolog 2 OS=Homo sapiens GN=MSI2 PE=2 SV=1 - [B4DHE8_HUMAN]	16.0332	17.59	4	4	34.7901	P46783	40S ribosomal protein S10 OS=Homo sapiens GN=RPS10 PE=1 SV=1 - [RS10_HUMAN]	28.4021	27.27	4	5	18.8859	B4DHE8	RNA-binding protein Musashi homolog 2 OS=Homo sapiens GN=MSI2 PE=2 SV=1 - [B4DHE8_HUMAN]	14.8403	17.59	5	4	34.7901	P14314
B2RDY9	Adenylyl cyclase-associated protein OS=Homo sapiens PE=2 SV=1 - [B2RDY9_HUMAN]	13.2493	14.11	5	5	51.5826	P51148	Ras-related protein Rab-5C OS=Homo sapiens GN=RAB5C PE=1 SV=2 - [RAB5C_HUMAN]	16.0389	34.26	12	6	23.4678	A8MTG3	Zinc finger protein 207 OS=Homo sapiens GN=ZNF207 PE=4 SV=1 - [A8MTG3_HUMAN]	10.7071	11.86	6	4	47.7177	B4DZQ7	cDNA FLJ58652, highly similar to Probable ATP-dependent RNA helicase DDX17 (EC 3.6.1.-) OS=Homo sapiens PE=2 SV=1 - [B4DZQ7_HUMAN]	16.471	16.43	8	6	47.5272	A8K2S1	cDNA FLJ75258, highly similar to Homo sapiens phospholipase A2, group IVA (cytosolic, calcium-dependent) (PLA2G4A), mRNA OS=Homo sapiens PE=2 SV=1 - [A8K2S1_HUMAN]	15.7842	8.54	4	6	85.1823	P13010	X-ray repair cross-complementing protein 5 OS=Homo sapiens GN=XRCC5 PE=1 SV=3 - [XRCC5_HUMAN]	28.2242	14.07	2	11	82.6523	B4DJW8	cDNA FLJ55697, highly similar to Protein transport protein Sec23B OS=Homo sapiens PE=2 SV=1 - [B4DJW8_HUMAN]	14.8166	10.01	4	6	84.4345	B4DY09
B4DVT6	cDNA FLJ52170, highly similar to Homo sapiens pyrroline-5-carboxylate reductase-like (PYCRL), mRNA OS=Homo sapiens PE=2 SV=1 - [B4DVT6_HUMAN]	13.2159	14.17	4	3	26.4226	B3KQ59	RuvB-like 2 (E. coli) OS=Homo sapiens GN=RUVBL2 PE=2 SV=1 - [B3KQ59_HUMAN]	16.0015	18.42	4	6	46.277	B4DW94	RAP1B, member of RAS oncogene family OS=Homo sapiens GN=RAP1B PE=2 SV=1 - [B4DW94_HUMAN]	10.635	31.39	5	4	15.3459	Q9Y265-2	Isoform 2 of RuvB-like 1 OS=Homo sapiens GN=RUVBL1 - [RUVB1_HUMAN]	16.4571	17.88	3	5	42.1	Q71V99	Peptidyl-prolyl cis-trans isomerase OS=Homo sapiens PE=2 SV=1 - [Q71V99_HUMAN]	15.7518	24.39	8	6	17.9599	Q9Y5K5	Ubiquitin carboxyl-terminal hydrolase isozyme L5 OS=Homo sapiens GN=UCHL5 PE=1 SV=3 - [UCHL5_HUMAN]	28.1508	27.96	10	9	37.583	B5BU24	14-3-3 protein beta/alpha OS=Homo sapiens GN=YWHAB PE=2 SV=1 - [B5BU24_HUMAN]	14.7847	25.61	8	6	28.0948	P31689
P42226-2	Isoform 2 of Signal transducer and activator of transcription 6 OS=Homo sapiens GN=STAT6 - [STAT6_HUMAN]	13.1533	11.29	11	6	74.4089	P62258	14-3-3 protein epsilon OS=Homo sapiens GN=YWHAE PE=1 SV=1 - [1433E_HUMAN]	15.9094	22.35	20	6	29.1554	P04632	Calpain small subunit 1 OS=Homo sapiens GN=CAPNS1 PE=1 SV=1 - [CPNS1_HUMAN]	10.6297	11.94	1	3	28.2977	P02786	Transferrin receptor protein 1 OS=Homo sapiens GN=TFRC PE=1 SV=2 - [TFR1_HUMAN]	16.436	9.08	1	6	84.8179	P13489	Ribonuclease inhibitor OS=Homo sapiens GN=RNH1 PE=1 SV=2 - [RINI_HUMAN]	15.6872	17.35	8	6	49.9411	B4DRA5	cDNA FLJ61346, highly similar to Protein transport protein Sec23B OS=Homo sapiens PE=2 SV=1 - [B4DRA5_HUMAN]	28.1347	13.21	6	8	83.7562	P07737	Profilin-1 OS=Homo sapiens GN=PFN1 PE=1 SV=2 - [PROF1_HUMAN]	14.735	45.71	3	5	15.0446	Q92973
Q9BV68-2	Isoform 2 of RING finger protein 126 OS=Homo sapiens GN=RNF126 - [RN126_HUMAN]	13.1315	11.25	2	3	33.8403	Q96P70	Importin-9 OS=Homo sapiens GN=IPO9 PE=1 SV=3 - [IPO9_HUMAN]	15.9025	5	1	3	115.889	B7Z6M1	Plastin 3 OS=Homo sapiens GN=PLS3 PE=2 SV=1 - [B7Z6M1_HUMAN]	10.5998	7.52	6	4	65.5908	O43684-2	Isoform 2 of Mitotic checkpoint protein BUB3 OS=Homo sapiens GN=BUB3 - [BUB3_HUMAN]	16.3252	20.55	2	6	36.9311	Q13283	Ras GTPase-activating protein-binding protein 1 OS=Homo sapiens GN=G3BP1 PE=1 SV=1 - [G3BP1_HUMAN]	15.6811	20.17	8	7	52.1321	B2R4D8	60S ribosomal protein L27 OS=Homo sapiens PE=2 SV=1 - [B2R4D8_HUMAN]	27.9477	32.35	6	5	15.7597	Q13151	Heterogeneous nuclear ribonucleoprotein A0 OS=Homo sapiens GN=HNRNPA0 PE=1 SV=1 - [ROA0_HUMAN]	14.6106	17.7	1	4	30.8218	E4W6B6
P30050	60S ribosomal protein L12 OS=Homo sapiens GN=RPL12 PE=1 SV=1 - [RL12_HUMAN]	13.0446	33.94	2	4	17.8075	Q13151	Heterogeneous nuclear ribonucleoprotein A0 OS=Homo sapiens GN=HNRNPA0 PE=1 SV=1 - [ROA0_HUMAN]	15.9014	17.05	1	4	30.8218	O75396	Vesicle-trafficking protein SEC22b OS=Homo sapiens GN=SEC22B PE=1 SV=4 - [SC22B_HUMAN]	10.3962	20.93	1	3	24.5775	P61026	Ras-related protein Rab-10 OS=Homo sapiens GN=RAB10 PE=1 SV=1 - [RAB10_HUMAN]	16.3181	32	1	5	22.5266	B3KPS9	cDNA FLJ32140 fis, clone PLACE5000058, highly similar to Importin-4 OS=Homo sapiens PE=2 SV=1 - [B3KPS9_HUMAN]	15.6529	7.51	15	5	103.167	G3V210	60S acidic ribosomal protein P0 OS=Homo sapiens GN=RPLP0 PE=3 SV=1 - [G3V210_HUMAN]	27.7518	32.53	18	5	18.2587	P62805	Histone H4 OS=Homo sapiens GN=HIST1H4A PE=1 SV=2 - [H4_HUMAN]	14.5989	42.72	2	6	11.3604	P48444
E9PKG1	Protein arginine methyltransferase 1 OS=Homo sapiens GN=PRMT1 PE=4 SV=1 - [E9PKG1_HUMAN]	12.9463	21.85	7	5	37.6848	P06733	Alpha-enolase OS=Homo sapiens GN=ENO1 PE=1 SV=2 - [ENOA_HUMAN]	15.7717	11.52	26	3	47.1393	Q14157-4	Isoform 4 of Ubiquitin-associated protein 2-like OS=Homo sapiens GN=UBAP2L - [UBP2L_HUMAN]	10.3197	4.41	7	3	103.106	G3V1S6	UDP-N-acetyl-alpha-D-galactosamine:polypeptide N-acetylgalactosaminyltransferase 2 (GalNAc-T2) OS=Homo sapiens GN=GALNT2 PE=3 SV=1 - [G3V1S6_HUMAN]	16.3026	15.76	2	7	60.7554	E5RGA2	Eukaryotic translation initiation factor 3 subunit E OS=Homo sapiens GN=EIF3E PE=2 SV=1 - [E5RGA2_HUMAN]	15.5799	17.9	9	7	41.3307	O43684	Mitotic checkpoint protein BUB3 OS=Homo sapiens GN=BUB3 PE=1 SV=1 - [BUB3_HUMAN]	27.6408	23.78	4	7	37.1312	P48444	Coatomer subunit delta OS=Homo sapiens GN=ARCN1 PE=1 SV=1 - [COPD_HUMAN]	14.5958	11.15	4	5	57.1741	B5BUB1
B4DWH5	cDNA FLJ53224, highly similar to Calpain-1 catalytic subunit (EC 3.4.22.52) OS=Homo sapiens PE=2 SV=1 - [B4DWH5_HUMAN]	12.9114	7.73	3	5	75.787	P18206-2	Isoform 1 of Vinculin OS=Homo sapiens GN=VCL - [VINC_HUMAN]	15.714	7.41	10	7	116.649	Q6PKI6	YBX1 protein (Fragment) OS=Homo sapiens GN=YBX1 PE=2 SV=1 - [Q6PKI6_HUMAN]	10.237	12.78	5	2	29.3567	P39023	60S ribosomal protein L3 OS=Homo sapiens GN=RPL3 PE=1 SV=2 - [RL3_HUMAN]	16.259	14.39	1	6	46.0798	Q3BDU5	Rhabdomyosarcoma antigen MU-RMS-40.12 OS=Homo sapiens PE=2 SV=1 - [Q3BDU5_HUMAN]	15.5363	15.4	10	6	55.6048	A8K525	cDNA FLJ76817, highly similar to Homo sapiens non-POU domain containing, octamer-binding (NONO), mRNA OS=Homo sapiens PE=2 SV=1 - [A8K525_HUMAN]	27.5809	14.86	5	6	54.2534	B7Z6K2	cDNA FLJ58625, highly similar to Polypeptide N-acetylgalactosaminyltransferase 2 (EC 2.4.1.41) OS=Homo sapiens PE=2 SV=1 - [B7Z6K2_HUMAN]	14.5921	11.63	4	5	60.7874	E9PAU2
B4DJ74	cDNA FLJ58398, highly similar to A-kinase anchor protein 8 OS=Homo sapiens PE=2 SV=1 - [B4DJ74_HUMAN]	12.8521	7.18	1	3	65.1799	A8K3Q9	cDNA FLJ76611, highly similar to Homo sapiens ribosomal protein L14 (RPL14), mRNA OS=Homo sapiens PE=2 SV=1 - [A8K3Q9_HUMAN]	15.7114	21.76	1	4	23.44	B4E356	cDNA FLJ54993, highly similar to ATP-dependent DNA helicase 2 subunit 1 (EC 3.6.1.-) OS=Homo sapiens PE=2 SV=1 - [B4E356_HUMAN]	10.2214	9.45	7	4	54.4177	P30044-2	Isoform Cytoplasmic+peroxisomal of Peroxiredoxin-5, mitochondrial OS=Homo sapiens GN=PRDX5 - [PRDX5_HUMAN]	16.2581	30.86	2	4	17.02	P05387	60S acidic ribosomal protein P2 OS=Homo sapiens GN=RPLP2 PE=1 SV=1 - [RLA2_HUMAN]	15.4098	40.87	1	3	11.6578	Q13283	Ras GTPase-activating protein-binding protein 1 OS=Homo sapiens GN=G3BP1 PE=1 SV=1 - [G3BP1_HUMAN]	27.5672	16.52	8	6	52.1321	M0R080	DnaJ homolog subfamily B member 1 (Fragment) OS=Homo sapiens GN=DNAJB1 PE=4 SV=1 - [M0R080_HUMAN]	14.5707	34.43	8	5	20.4843	Q92900
P51148	Ras-related protein Rab-5C OS=Homo sapiens GN=RAB5C PE=1 SV=2 - [RAB5C_HUMAN]	12.7448	27.78	2	5	23.4678	A2A3R5	40S ribosomal protein S6 OS=Homo sapiens GN=RPS6 PE=3 SV=1 - [A2A3R5_HUMAN]	15.6788	28.44	5	5	24.953	A8K2R3	cDNA FLJ75083, highly similar to Homo sapiens amine oxidase (flavin containing) domain 2 (AOF2),mRNA OS=Homo sapiens PE=2 SV=1 - [A8K2R3_HUMAN]	10.1906	7.26	4	4	81.1187	Q9Y263	Phospholipase A-2-activating protein OS=Homo sapiens GN=PLAA PE=1 SV=2 - [PLAP_HUMAN]	16.2417	8.55	1	5	87.1014	Q02790	Peptidyl-prolyl cis-trans isomerase FKBP4 OS=Homo sapiens GN=FKBP4 PE=1 SV=3 - [FKBP4_HUMAN]	15.3593	19.39	4	9	51.7721	I3L3P7	40S ribosomal protein S15a OS=Homo sapiens GN=RPS15A PE=2 SV=1 - [I3L3P7_HUMAN]	27.4869	47	7	5	11.4702	Q02790	Peptidyl-prolyl cis-trans isomerase FKBP4 OS=Homo sapiens GN=FKBP4 PE=1 SV=3 - [FKBP4_HUMAN]	14.5612	16.99	3	7	51.7721	P53618
B4DWN1	Uncharacterized protein OS=Homo sapiens GN=LMAN2 PE=2 SV=1 - [B4DWN1_HUMAN]	12.6832	19.3	3	5	32.5571	C9J9K3	Ribosomal protein SA (Fragment) OS=Homo sapiens GN=RPSA PE=3 SV=1 - [C9J9K3_HUMAN]	15.6735	17.8	5	5	29.487	B3KTM6	Ribosomal protein L5, isoform CRA_b OS=Homo sapiens GN=RPL5 PE=2 SV=1 - [B3KTM6_HUMAN]	10.1827	21.05	2	4	28.0262	B3KTM6	Ribosomal protein L5, isoform CRA_b OS=Homo sapiens GN=RPL5 PE=2 SV=1 - [B3KTM6_HUMAN]	16.2329	21.86	3	4	28.0262	B2RDX5	cDNA, FLJ96812, highly similar to Homo sapiens threonyl-tRNA synthetase (TARS), mRNA OS=Homo sapiens PE=2 SV=1 - [B2RDX5_HUMAN]	15.3052	10.55	11	8	82.0612	P26641	Elongation factor 1-gamma OS=Homo sapiens GN=EEF1G PE=1 SV=3 - [EF1G_HUMAN]	27.2933	15.1	6	6	50.0871	Q9Y230	RuvB-like 2 OS=Homo sapiens GN=RUVBL2 PE=1 SV=3 - [RUVB2_HUMAN]	14.5315	12.74	6	5	51.1246	P62263
A8K4L9	Uncharacterized protein OS=Homo sapiens GN=TIAL1 PE=2 SV=1 - [A8K4L9_HUMAN]	12.5869	11.73	1	4	43.4211	P04632	Calpain small subunit 1 OS=Homo sapiens GN=CAPNS1 PE=1 SV=1 - [CPNS1_HUMAN]	15.67	16.79	2	4	28.2977	Q14697	Neutral alpha-glucosidase AB OS=Homo sapiens GN=GANAB PE=1 SV=3 - [GANAB_HUMAN]	10.1233	3.81	3	3	106.807	P31350	Ribonucleoside-diphosphate reductase subunit M2 OS=Homo sapiens GN=RRM2 PE=1 SV=1 - [RIR2_HUMAN]	16.1631	16.97	2	5	44.8488	B4DWG1	cDNA FLJ55643, highly similar to SEC23-interacting protein OS=Homo sapiens PE=2 SV=1 - [B4DWG1_HUMAN]	15.257	8.24	5	5	89.6504	P42677	40S ribosomal protein S27 OS=Homo sapiens GN=RPS27 PE=1 SV=3 - [RS27_HUMAN]	27.0559	39.29	5	4	9.45484	I6L965	KRT18 protein (Fragment) OS=Homo sapiens GN=KRT18 PE=2 SV=1 - [I6L965_HUMAN]	14.4754	12.9	4	6	42.1477	B7Z5S7
O95628-8	Isoform 8 of CCR4-NOT transcription complex subunit 4 OS=Homo sapiens GN=CNOT4 - [CNOT4_HUMAN]	12.5748	6.89	5	3	70.2946	P25685	DnaJ homolog subfamily B member 1 OS=Homo sapiens GN=DNAJB1 PE=1 SV=4 - [DNJB1_HUMAN]	15.599	19.71	4	6	38.0204	O75533	Splicing factor 3B subunit 1 OS=Homo sapiens GN=SF3B1 PE=1 SV=3 - [SF3B1_HUMAN]	10.1003	4.98	1	5	145.738	E7EPA8	Prolyl 4-hydroxylase, beta polypeptide OS=Homo sapiens GN=P4HB PE=3 SV=2 - [E7EPA8_HUMAN]	16.1256	13.82	2	6	55.3607	Q96HX3	Similar to ribophorin I (Fragment) OS=Homo sapiens PE=2 SV=1 - [Q96HX3_HUMAN]	15.1066	12.5	7	6	64.5417	Q59GU6	Sorting nexin 1 isoform a variant (Fragment) OS=Homo sapiens PE=2 SV=1 - [Q59GU6_HUMAN]	27.0118	22.69	6	8	50.0679	H7C5W9	Sarcoplasmic/endoplasmic reticulum calcium ATPase 2 (Fragment) OS=Homo sapiens GN=ATP2A2 PE=3 SV=1 - [H7C5W9_HUMAN]	14.4308	8.15	9	6	102.523	Q05CK9
Q9H7S9	Zinc finger protein 703 OS=Homo sapiens GN=ZNF703 PE=1 SV=1 - [ZN703_HUMAN]	12.4458	8.14	1	3	58.1859	E9PPJ0	Splicing factor 3b, subunit 2, 145kDa OS=Homo sapiens GN=SF3B2 PE=4 SV=1 - [E9PPJ0_HUMAN]	15.4952	6.95	9	5	98.1089	A4QN19	SEC16A protein (Fragment) OS=Homo sapiens GN=SEC16A PE=2 SV=1 - [A4QN19_HUMAN]	10.0839	2.9	8	3	186.378	P07737	Profilin-1 OS=Homo sapiens GN=PFN1 PE=1 SV=2 - [PROF1_HUMAN]	16.093	43.57	1	5	15.0446	A8K7D9	Importin subunit alpha OS=Homo sapiens PE=2 SV=1 - [A8K7D9_HUMAN]	15.0769	13.42	6	5	57.7979	P27348	14-3-3 protein theta OS=Homo sapiens GN=YWHAQ PE=1 SV=1 - [1433T_HUMAN]	26.9538	22.86	8	6	27.7468	B2R6J4	cDNA, FLJ92975, highly similar to Homo sapiens nucleosome assembly protein 1-like 4 (NAP1L4), mRNA OS=Homo sapiens PE=2 SV=1 - [B2R6J4_HUMAN]	14.4238	14.13	16	4	42.7689	Q71UM5
Q53F37	SAR1a gene homolog 2 variant (Fragment) OS=Homo sapiens PE=2 SV=1 - [Q53F37_HUMAN]	12.3524	25.25	2	5	22.3955	P31350	Ribonucleoside-diphosphate reductase subunit M2 OS=Homo sapiens GN=RRM2 PE=1 SV=1 - [RIR2_HUMAN]	15.4477	23.14	33	6	44.8488	Q9H2R7	NPD011 OS=Homo sapiens GN=NUDC PE=2 SV=1 - [Q9H2R7_HUMAN]	10.072	17.06	2	3	24.3385	P62820	Ras-related protein Rab-1A OS=Homo sapiens GN=RAB1A PE=1 SV=3 - [RAB1A_HUMAN]	16.078	36.59	1	6	22.6634	Q06830	Peroxiredoxin-1 OS=Homo sapiens GN=PRDX1 PE=1 SV=1 - [PRDX1_HUMAN]	15.0417	35.68	2	7	22.0963	P13639	Elongation factor 2 OS=Homo sapiens GN=EEF2 PE=1 SV=4 - [EF2_HUMAN]	26.7707	10.61	6	9	95.277	P30050	60S ribosomal protein L12 OS=Homo sapiens GN=RPL12 PE=1 SV=1 - [RL12_HUMAN]	14.3944	33.94	3	4	17.8075	P49207
D6RAF8	Heterogeneous nuclear ribonucleoprotein D (AU-rich element RNA binding protein 1, 37kDa) (Fragment) OS=Homo sapiens GN=HNRNPD PE=4 SV=1 - [D6RAF8_HUMAN]	12.3458	16.29	3	3	23.0622	Q08554-2	Isoform 1B of Desmocollin-1 OS=Homo sapiens GN=DSC1 - [DSC1_HUMAN]	15.4313	5.83	2	4	93.776	P25685	DnaJ homolog subfamily B member 1 OS=Homo sapiens GN=DNAJB1 PE=1 SV=4 - [DNJB1_HUMAN]	10.0433	12.65	2	3	38.0204	O75396	Vesicle-trafficking protein SEC22b OS=Homo sapiens GN=SEC22B PE=1 SV=4 - [SC22B_HUMAN]	16.0089	25.58	1	4	24.5775	Q96IF9	VCP protein (Fragment) OS=Homo sapiens GN=VCP PE=2 SV=2 - [Q96IF9_HUMAN]	14.9044	8.7	5	4	71.0211	F8W181	60S ribosomal protein L6 (Fragment) OS=Homo sapiens GN=RPL6 PE=2 SV=1 - [F8W181_HUMAN]	26.7302	36.73	8	8	25.8758	Q96I24	Far upstream element-binding protein 3 OS=Homo sapiens GN=FUBP3 PE=1 SV=2 - [FUBP3_HUMAN]	14.3646	10.31	1	6	61.6022	Q9BQQ5
P13489	Ribonuclease inhibitor OS=Homo sapiens GN=RNH1 PE=1 SV=2 - [RINI_HUMAN]	12.3446	11.28	1	4	49.9411	F8W1R7	Myosin, light chain 6, alkali, smooth muscle and non-muscle OS=Homo sapiens GN=MYL6 PE=4 SV=1 - [F8W1R7_HUMAN]	15.4167	42.07	17	5	16.2798	P52948-6	Isoform 6 of Nuclear pore complex protein Nup98-Nup96 OS=Homo sapiens GN=NUP98 - [NUP98_HUMAN]	9.96558	2.74	4	4	186.153	P37198	Nuclear pore glycoprotein p62 OS=Homo sapiens GN=NUP62 PE=1 SV=3 - [NUP62_HUMAN]	15.9123	10.15	1	4	53.2225	E9PR38	Pumilio homolog 1 OS=Homo sapiens GN=PUM1 PE=2 SV=1 - [E9PR38_HUMAN]	14.8571	7.2	14	5	100.437	B0I1P6	Kidney ankyrin repeat-containing protein 4 OS=Homo sapiens GN=Kank4 PE=2 SV=1 - [B0I1P6_HUMAN]	26.655	11.66	6	10	107.281	P10620	Microsomal glutathione S-transferase 1 OS=Homo sapiens GN=MGST1 PE=1 SV=1 - [MGST1_HUMAN]	14.2456	19.35	2	2	17.5872	P61106
A8K9J7	Histone H2B OS=Homo sapiens PE=2 SV=1 - [A8K9J7_HUMAN]	12.3129	28.57	13	4	13.9876	P50552	Vasodilator-stimulated phosphoprotein OS=Homo sapiens GN=VASP PE=1 SV=3 - [VASP_HUMAN]	15.4058	13.68	1	4	39.8051	Q2Q9H2	Glucose-6-phosphate 1-dehydrogenase (Fragment) OS=Homo sapiens GN=G6PD PE=2 SV=1 - [Q2Q9H2_HUMAN]	9.93165	12	6	4	54.7898	P08754	Guanine nucleotide-binding protein G(k) subunit alpha OS=Homo sapiens GN=GNAI3 PE=1 SV=3 - [GNAI3_HUMAN]	15.8887	18.93	1	5	40.5063	Q96P70	Importin-9 OS=Homo sapiens GN=IPO9 PE=1 SV=3 - [IPO9_HUMAN]	14.8305	5.57	1	4	115.889	Q5JSH3	WD repeat-containing protein 44 OS=Homo sapiens GN=WDR44 PE=1 SV=1 - [WDR44_HUMAN]	26.5642	10.95	6	8	101.304	B4E2V5	Erythrocyte band 7 integral membrane protein OS=Homo sapiens GN=STOM PE=2 SV=1 - [B4E2V5_HUMAN]	14.2227	25.74	4	4	25.9478	B4DZC3
Q71RC2-2	Isoform 2 of La-related protein 4 OS=Homo sapiens GN=LARP4 - [LARP4_HUMAN]	12.3101	7.11	5	3	67.2383	C9JXB8	Ribosomal protein L24 OS=Homo sapiens GN=RPL24 PE=4 SV=1 - [C9JXB8_HUMAN]	15.3859	33.06	3	4	14.3598	B4E217	Uncharacterized protein OS=Homo sapiens GN=BAG4 PE=2 SV=1 - [B4E217_HUMAN]	9.90449	9.74	2	3	45.3815	Q2TNB3	Cell migration-inducing protein 22 OS=Homo sapiens PE=2 SV=1 - [Q2TNB3_HUMAN]	15.8708	23.85	5	4	27.3313	B4DRB6	cDNA FLJ59394, highly similar to Homo sapiens ubiquitin associated protein 2 (UBAP2), transcript variant 1, mRNA OS=Homo sapiens PE=2 SV=1 - [B4DRB6_HUMAN]	14.8151	6.64	13	4	90.2762	O00231	26S proteasome non-ATPase regulatory subunit 11 OS=Homo sapiens GN=PSMD11 PE=1 SV=3 - [PSD11_HUMAN]	26.4622	24.17	3	8	47.434	Q8N5M0	ATP-dependent RNA helicase DDX39A OS=Homo sapiens GN=DDX39A PE=2 SV=1 - [Q8N5M0_HUMAN]	14.0887	19.25	10	6	36.5535	G3V210
Q59FC6	Tumor rejection antigen (Gp96) 1 variant (Fragment) OS=Homo sapiens PE=2 SV=1 - [Q59FC6_HUMAN]	12.2189	7.64	3	4	65.9123	Q8IZP2	Putative protein FAM10A4 OS=Homo sapiens GN=ST13P4 PE=5 SV=1 - [ST134_HUMAN]	15.3529	26.25	10	5	27.3897	F5H018	RAN, member RAS oncogene family (Fragment) OS=Homo sapiens GN=RAN PE=4 SV=1 - [F5H018_HUMAN]	9.84867	24.12	3	4	22.5207	Q86VP6-2	Isoform 2 of Cullin-associated NEDD8-dissociated protein 1 OS=Homo sapiens GN=CAND1 - [CAND1_HUMAN]	15.8662	6.97	3	6	117.814	A0PJ62	RPL14 protein (Fragment) OS=Homo sapiens GN=RPL14 PE=2 SV=1 - [A0PJ62_HUMAN]	14.7664	41.94	6	5	14.6019	A4QPB0	IQ motif containing GTPase activating protein 1 OS=Homo sapiens GN=IQGAP1 PE=2 SV=1 - [A4QPB0_HUMAN]	26.3398	6.76	9	9	189.162	F8W181	60S ribosomal protein L6 (Fragment) OS=Homo sapiens GN=RPL6 PE=2 SV=1 - [F8W181_HUMAN]	14.0421	25.66	7	5	25.8758	A8MUD9
E9PBV3	Suprabasin OS=Homo sapiens GN=SBSN PE=4 SV=1 - [E9PBV3_HUMAN]	12.2093	14.58	1	3	60.5046	B1AHB1	MCM5 minichromosome maintenance deficient 5, cell division cycle 46 (S. cerevisiae), isoform CRA_c OS=Homo sapiens GN=MCM5 PE=3 SV=1 - [B1AHB1_HUMAN]	15.3428	9.99	9	5	77.5437	B7Z8S8	cDNA FLJ52193, highly similar to Calpastatin OS=Homo sapiens PE=2 SV=1 - [B7Z8S8_HUMAN]	9.75128	16.18	27	4	37.7278	H0YH87	Ataxin 2 (Fragment) OS=Homo sapiens GN=ATXN2 PE=4 SV=1 - [H0YH87_HUMAN]	15.8456	6.88	7	4	98.0546	Q4ZG57	Putative uncharacterized protein MCM6 (Fragment) OS=Homo sapiens GN=MCM6 PE=2 SV=1 - [Q4ZG57_HUMAN]	14.7623	12.1	3	7	88.8903	Q8N1N4	Keratin, type II cytoskeletal 78 OS=Homo sapiens GN=KRT78 PE=2 SV=2 - [K2C78_HUMAN]	26.3302	12.69	2	7	56.8305	Q2TAM5	RELA protein OS=Homo sapiens GN=RELA PE=2 SV=1 - [Q2TAM5_HUMAN]	14.0389	19.63	9	5	42.8416	Q27J81
Q8IYB5-3	Isoform 3 of Stromal membrane-associated protein 1 OS=Homo sapiens GN=SMAP1 - [SMAP1_HUMAN]	12.2092	9.4	5	3	47.8311	Q5LJ98	TROVE domain family, member 2 OS=Homo sapiens GN=TROVE2 PE=2 SV=1 - [Q5LJ98_HUMAN]	15.34	12.74	10	5	58.4452	P20618	Proteasome subunit beta type-1 OS=Homo sapiens GN=PSMB1 PE=1 SV=2 - [PSB1_HUMAN]	9.6674	17.43	2	3	26.4724	P45974-2	Isoform Short of Ubiquitin carboxyl-terminal hydrolase 5 OS=Homo sapiens GN=USP5 - [UBP5_HUMAN]	15.8191	11.14	2	8	93.2484	Q13085	Acetyl-CoA carboxylase 1 OS=Homo sapiens GN=ACACA PE=1 SV=2 - [ACACA_HUMAN]	14.7244	3.32	8	6	265.385	B7Z9W6	cDNA, FLJ78980, highly similar to DnaJ homolog subfamily C member 7 OS=Homo sapiens PE=2 SV=1 - [B7Z9W6_HUMAN]	26.1735	16.67	12	6	50.0348	C9JXB8	60S ribosomal protein L24 OS=Homo sapiens GN=RPL24 PE=2 SV=1 - [C9JXB8_HUMAN]	14.0112	34.71	3	5	14.3598	O75396
E7EPY1	TNFAIP3 interacting protein 1 OS=Homo sapiens GN=TNIP1 PE=4 SV=1 - [E7EPY1_HUMAN]	12.2074	11.87	9	5	62.5704	B4DRW1	cDNA FLJ55805, highly similar to Keratin, type II cytoskeletal 4 OS=Homo sapiens PE=2 SV=1 - [B4DRW1_HUMAN]	15.2385	10.97	12	5	51.7272	F5GWK3	RNA binding motif protein 22 OS=Homo sapiens GN=RBM22 PE=4 SV=1 - [F5GWK3_HUMAN]	9.64046	11.32	3	4	41.1055	P80723-2	Isoform 2 of Brain acid soluble protein 1 OS=Homo sapiens GN=BASP1 - [BASP1_HUMAN]	15.6882	35.84	2	4	17.6536	P84085	ADP-ribosylation factor 5 (Fragment) OS=Homo sapiens GN=ARF5 PE=2 SV=1 - [C9J1Z8_HUMAN]	14.6857	40	3	5	17.0959	Q8NA80	cDNA FLJ35762 fis, clone TESTI2004793, moderately similar to Homo sapiens NY-REN-2 antigen mRNA OS=Homo sapiens PE=2 SV=1 - [Q8NA80_HUMAN]	26.006	18.91	6	8	58.2732	Q15645	Pachytene checkpoint protein 2 homolog OS=Homo sapiens GN=TRIP13 PE=1 SV=2 - [PCH2_HUMAN]	13.9738	15.51	2	5	48.5205	B2R6U8
P12273	Prolactin-inducible protein OS=Homo sapiens GN=PIP PE=1 SV=1 - [PIP_HUMAN]	12.2015	36.3	1	4	16.5618	P62854	40S ribosomal protein S26 OS=Homo sapiens GN=RPS26 PE=1 SV=3 - [RS26_HUMAN]	15.2228	44.35	7	4	13.0071	B4E3L5	cDNA FLJ54656, highly similar to Aryl hydrocarbon receptor nuclear translocator OS=Homo sapiens PE=2 SV=1 - [B4E3L5_HUMAN]	9.62605	6.22	11	3	82.2643	B7Z5D8	Triosephosphate isomerase OS=Homo sapiens GN=TPI1 PE=2 SV=1 - [B7Z5D8_HUMAN]	15.6759	40.72	4	5	17.9473	P30044	Peroxiredoxin-5, mitochondrial OS=Homo sapiens GN=PRDX5 PE=1 SV=4 - [PRDX5_HUMAN]	14.6568	31.31	1	5	22.0725	P62917	60S ribosomal protein L8 OS=Homo sapiens GN=RPL8 PE=1 SV=2 - [RL8_HUMAN]	25.5554	22.18	7	6	28.0073	P45974	Ubiquitin carboxyl-terminal hydrolase 5 OS=Homo sapiens GN=USP5 PE=1 SV=2 - [UBP5_HUMAN]	13.9397	7.93	1	6	95.7253	M0R0Y3
P0CW22	40S ribosomal protein S17-like OS=Homo sapiens GN=RPS17L PE=3 SV=1 - [RS17L_HUMAN]	12.1742	16.3	3	3	15.5404	P62750	60S ribosomal protein L23a OS=Homo sapiens GN=RPL23A PE=1 SV=1 - [RL23A_HUMAN]	15.1561	26.92	5	5	17.6841	Q969X5-2	Isoform 2 of Endoplasmic reticulum-Golgi intermediate compartment protein 1 OS=Homo sapiens GN=ERGIC1 - [ERGI1_HUMAN]	9.57342	19.19	3	4	22.1462	F8VZY9	Keratin 18 OS=Homo sapiens GN=KRT18 PE=3 SV=1 - [F8VZY9_HUMAN]	15.6649	16.62	3	6	43.7474	M0R3F1	Heterogeneous nuclear ribonucleoprotein U-like protein 1 (Fragment) OS=Homo sapiens GN=HNRNPUL1 PE=4 SV=1 - [M0R3F1_HUMAN]	14.6412	11.7	9	7	71.677	P62854	40S ribosomal protein S26 OS=Homo sapiens GN=RPS26 PE=1 SV=3 - [RS26_HUMAN]	25.5137	44.35	3	4	13.0071	B4DZQ7	cDNA FLJ58652, highly similar to Probable ATP-dependent RNA helicase DDX17 (EC 3.6.1.-) OS=Homo sapiens PE=2 SV=1 - [B4DZQ7_HUMAN]	13.7999	14.76	5	6	47.5272	B5BU99
P49756	RNA-binding protein 25 OS=Homo sapiens GN=RBM25 PE=1 SV=3 - [RBM25_HUMAN]	12.1513	5.93	1	4	100.124	B4DWQ5	cDNA FLJ51655, highly similar to Actin-like protein 2 OS=Homo sapiens PE=2 SV=1 - [B4DWQ5_HUMAN]	15.1073	17.7	7	4	34.4859	E9PJT3	Splicing factor 3b, subunit 2, 145kDa (Fragment) OS=Homo sapiens GN=SF3B2 PE=4 SV=1 - [E9PJT3_HUMAN]	9.55691	9.52	5	2	29.1163	B4DUR8	Chaperonin containing TCP1, subunit 3 (gamma) OS=Homo sapiens GN=CCT3 PE=2 SV=1 - [B4DUR8_HUMAN]	15.6631	13.6	8	6	55.6387	B3KVX6	cDNA FLJ41699 fis, clone HCHON2004776, highly similar to Homo sapiens cytoskeleton-associated protein 4 (CKAP4), mRNA OS=Homo sapiens PE=2 SV=1 - [B3KVX6_HUMAN]	14.6366	14.2	4	6	58.1158	M0R0F0	40S ribosomal protein S5 (Fragment) OS=Homo sapiens GN=RPS5 PE=3 SV=1 - [M0R0F0_HUMAN]	25.4538	28	6	6	22.3768	Q04917	14-3-3 protein eta OS=Homo sapiens GN=YWHAH PE=1 SV=4 - [1433F_HUMAN]	13.7451	16.26	4	4	28.201	B4E205
Q92879	cDNA FLJ61559, highly similar to CUG triplet repeat RNA-binding protein 1 OS=Homo sapiens PE=2 SV=1 - [B4E2U5_HUMAN]	12.1396	6.84	7	3	50.098	B3KVX6	cDNA FLJ41699 fis, clone HCHON2004776, highly similar to Homo sapiens cytoskeleton-associated protein 4 (CKAP4), mRNA OS=Homo sapiens PE=2 SV=1 - [B3KVX6_HUMAN]	15.0294	14.01	4	5	58.1158	Q5G7L5	WW domain binding protein 2 (Fragment) OS=Macaca fascicularis GN=WBP2 PE=2 SV=1 - [Q5G7L5_MACFA]	9.51608	27.64	8	4	13.4737	B4DNY3	Adenylyl cyclase-associated protein OS=Homo sapiens PE=2 SV=1 - [B4DNY3_HUMAN]	15.6578	17.21	5	5	43.6787	E9PL38	26S proteasome non-ATPase regulatory subunit 13 (Fragment) OS=Homo sapiens GN=PSMD13 PE=2 SV=1 - [E9PL38_HUMAN]	14.5349	27.76	9	6	29.7364	E5KQF5	Glucocorticoid receptor OS=Homo sapiens GN=NR3C1 PE=2 SV=1 - [E5KQF5_HUMAN]	25.4115	10.38	12	6	81.4574	Q7Z3K9	Putative uncharacterized protein DKFZp781L0540 (Fragment) OS=Homo sapiens GN=DKFZp781L0540 PE=2 SV=1 - [Q7Z3K9_HUMAN]	13.7265	5.26	3	3	89.9667	P61313
A8K7D9	cDNA FLJ78270, highly similar to Homo sapiens karyopherin alpha 2 (RAG cohort 1, importin alpha 1)(KPNA2), mRNA OS=Homo sapiens PE=2 SV=1 - [A8K7D9_HUMAN]	12.057	9.45	5	3	57.7979	B4E363	Phenylalanyl-tRNA synthetase, alpha subunit OS=Homo sapiens GN=FARSA PE=2 SV=1 - [B4E363_HUMAN]	15.0054	10.06	2	4	54.1238	P62280	40S ribosomal protein S11 OS=Homo sapiens GN=RPS11 PE=1 SV=3 - [RS11_HUMAN]	9.50214	29.75	1	5	18.419	P48444	Coatomer subunit delta OS=Homo sapiens GN=ARCN1 PE=1 SV=1 - [COPD_HUMAN]	15.6386	13.5	3	6	57.1741	Q08211	ATP-dependent RNA helicase A OS=Homo sapiens GN=DHX9 PE=1 SV=4 - [DHX9_HUMAN]	14.444	4.72	2	5	140.869	B5BUB1	RuvB-like 1 (Fragment) OS=Homo sapiens GN=RUVBL1 PE=2 SV=1 - [B5BUB1_HUMAN]	25.4055	23.9	6	8	50.1843	Q09666	Neuroblast differentiation-associated protein AHNAK OS=Homo sapiens GN=AHNAK PE=1 SV=2 - [AHNK_HUMAN]	13.6952	2.05	3	5	628.699	O00425
Q14697-2	Isoform 2 of Neutral alpha-glucosidase AB OS=Homo sapiens GN=GANAB - [GANAB_HUMAN]	11.9583	6.83	1	5	109.369	P0CW22	40S ribosomal protein S17-like OS=Homo sapiens GN=RPS17L PE=3 SV=1 - [RS17L_HUMAN]	14.9902	20.74	15	4	15.5404	O00425	Insulin-like growth factor 2 mRNA-binding protein 3 OS=Homo sapiens GN=IGF2BP3 PE=1 SV=2 - [IF2B3_HUMAN]	9.42341	8.46	1	4	63.6656	P62753	40S ribosomal protein S6 OS=Homo sapiens GN=RPS6 PE=1 SV=1 - [RS6_HUMAN]	15.5721	14.06	2	3	28.663	P61204	ADP-ribosylation factor 3 OS=Homo sapiens GN=ARF3 PE=1 SV=2 - [ARF3_HUMAN]	14.44	32.04	9	5	20.5877	P28340	DNA polymerase delta catalytic subunit OS=Homo sapiens GN=POLD1 PE=1 SV=2 - [DPOD1_HUMAN]	25.3675	9.3	7	9	123.553	Q5T7N0	60S ribosomal protein L5 OS=Homo sapiens GN=RPL5 PE=2 SV=1 - [Q5T7N0_HUMAN]	13.6949	35.71	5	3	13.6419	Q08ES8
C9J1Z8	ADP-ribosylation factor (Fragment) OS=Homo sapiens GN=ARF5 PE=3 SV=1 - [C9J1Z8_HUMAN]	11.9086	30.67	2	4	17.0959	P26641	Elongation factor 1-gamma OS=Homo sapiens GN=EEF1G PE=1 SV=3 - [EF1G_HUMAN]	14.9056	13.04	7	6	50.0871	C9J9K3	Ribosomal protein SA (Fragment) OS=Homo sapiens GN=RPSA PE=3 SV=1 - [C9J9K3_HUMAN]	9.41012	13.64	3	3	29.487	P54920	Alpha-soluble NSF attachment protein OS=Homo sapiens GN=NAPA PE=1 SV=3 - [SNAA_HUMAN]	15.4165	25.08	1	6	33.2113	M0R3D6	60S ribosomal protein L18a (Fragment) OS=Homo sapiens GN=RPL18A PE=4 SV=1 - [M0R3D6_HUMAN]	14.4321	36.17	11	5	16.7038	P30041	Peroxiredoxin-6 OS=Homo sapiens GN=PRDX6 PE=1 SV=3 - [PRDX6_HUMAN]	25.299	34.82	2	7	25.0192	F8VXY0	Heterogeneous nuclear ribonucleoprotein A1 OS=Homo sapiens GN=HNRNPA1 PE=2 SV=1 - [F8VXY0_HUMAN]	13.6397	23.03	18	6	32.6597	P26641
O75396	Vesicle-trafficking protein SEC22b OS=Homo sapiens GN=SEC22B PE=1 SV=4 - [SC22B_HUMAN]	11.8969	20.93	1	3	24.5775	P43686-2	Isoform 2 of 26S protease regulatory subunit 6B OS=Homo sapiens GN=PSMC4 - [PRS6B_HUMAN]	14.8597	10.08	2	3	43.4805	Q13151	Heterogeneous nuclear ribonucleoprotein A0 OS=Homo sapiens GN=HNRNPA0 PE=1 SV=1 - [ROA0_HUMAN]	9.38221	12.13	1	2	30.8218	P04632	Calpain small subunit 1 OS=Homo sapiens GN=CAPNS1 PE=1 SV=1 - [CPNS1_HUMAN]	15.4163	16.79	1	4	28.2977	D3DVA8	Ubiquilin 4, isoform CRA_a OS=Homo sapiens GN=UBQLN4 PE=2 SV=1 - [D3DVA8_HUMAN]	14.2986	13.48	6	4	45.9962	P42166	Lamina-associated polypeptide 2, isoform alpha OS=Homo sapiens GN=TMPO PE=1 SV=2 - [LAP2A_HUMAN]	25.1915	9.8	6	5	75.4456	Q8NA80	cDNA FLJ35762 fis, clone TESTI2004793, moderately similar to Homo sapiens NY-REN-2 antigen mRNA OS=Homo sapiens PE=2 SV=1 - [Q8NA80_HUMAN]	13.5978	11.05	6	4	58.2732	B0I1P6
P04075	Fructose-bisphosphate aldolase A OS=Homo sapiens GN=ALDOA PE=1 SV=2 - [ALDOA_HUMAN]	11.8869	12.91	1	4	39.3953	Q86VP6-2	Isoform 2 of Cullin-associated NEDD8-dissociated protein 1 OS=Homo sapiens GN=CAND1 - [CAND1_HUMAN]	14.8396	4.99	4	4	117.814	P05090	Apolipoprotein D OS=Homo sapiens GN=APOD PE=1 SV=1 - [APOD_HUMAN]	9.36333	20.11	2	3	21.2618	Q9Y230	RuvB-like 2 OS=Homo sapiens GN=RUVBL2 PE=1 SV=3 - [RUVB2_HUMAN]	15.3907	22.46	1	8	51.1246	P63173	60S ribosomal protein L38 OS=Homo sapiens GN=RPL38 PE=1 SV=2 - [RL38_HUMAN]	14.0414	50	4	4	8.21273	B4E2Z3	cDNA FLJ54090, highly similar to 4F2 cell-surface antigen heavy chain OS=Homo sapiens PE=2 SV=1 - [B4E2Z3_HUMAN]	25.0419	21.14	7	9	55.9047	P35579	Myosin-9 OS=Homo sapiens GN=MYH9 PE=1 SV=4 - [MYH9_HUMAN]	13.5969	3.57	5	5	226.392	A5YM50
B5LY69	Uridine monophosphate synthetase isoform G OS=Homo sapiens GN=UMPS PE=2 SV=1 - [B5LY69_HUMAN]	11.8196	10.16	3	3	40.2292	Q5H9R7-3	Isoform 3 of Serine/threonine-protein phosphatase 6 regulatory subunit 3 OS=Homo sapiens GN=PPP6R3 - [PP6R3_HUMAN]	14.8313	8.22	17	5	88.8533	Q8N5M4	Tetratricopeptide repeat protein 9C OS=Homo sapiens GN=TTC9C PE=1 SV=1 - [TTC9C_HUMAN]	9.26974	30.41	1	4	20.0002	P62750	60S ribosomal protein L23a OS=Homo sapiens GN=RPL23A PE=1 SV=1 - [RL23A_HUMAN]	15.3005	32.69	3	6	17.6841	E9PQH6	Rho-related GTP-binding protein RhoC (Fragment) OS=Homo sapiens GN=RHOC PE=2 SV=1 - [E9PQH6_HUMAN]	13.9869	27.81	12	5	19.2117	G3V1B3	60S ribosomal protein L21 OS=Homo sapiens GN=RPL21 PE=4 SV=1 - [G3V1B3_HUMAN]	24.9921	39.08	4	3	9.88007	H0YN73	40S ribosomal protein S17 (Fragment) OS=Homo sapiens GN=RPS17L PE=3 SV=1 - [H0YN73_HUMAN]	13.5695	37.29	4	3	6.86169	Q5DT20
D3DN77	HCG2022736, isoform CRA_a OS=Homo sapiens GN=hCG_2022736 PE=4 SV=1 - [D3DN77_HUMAN]	11.7915	25.75	5	8	30.749	P62249	40S ribosomal protein S16 OS=Homo sapiens GN=RPS16 PE=1 SV=2 - [RS16_HUMAN]	14.7904	45.21	2	7	16.435	P25311	Zinc-alpha-2-glycoprotein OS=Homo sapiens GN=AZGP1 PE=1 SV=2 - [ZA2G_HUMAN]	9.22893	12.75	1	3	34.2371	A8K9U0	cDNA FLJ78260, highly similar to Homo sapiens RNA binding motif protein 4, mRNA OS=Homo sapiens PE=2 SV=1 - [A8K9U0_HUMAN]	15.204	18.13	2	6	40.2586	O95747	Serine/threonine-protein kinase OSR1 OS=Homo sapiens GN=OXSR1 PE=1 SV=1 - [OXSR1_HUMAN]	13.9684	10.44	2	5	57.9861	B2R9U2	cDNA, FLJ94557, highly similar to Homo sapiens FK506 binding protein 4, 59kDa (FKBP4), mRNA OS=Homo sapiens PE=2 SV=1 - [B2R9U2_HUMAN]	24.9645	20.48	4	9	51.8021	K7EQ02	DAZ-associated protein 1 (Fragment) OS=Homo sapiens GN=DAZAP1 PE=4 SV=1 - [K7EQ02_HUMAN]	13.5646	28	4	4	24.7892	B3KQT9
F5GYU2	Lactate dehydrogenase A (Fragment) OS=Homo sapiens GN=LDHA PE=3 SV=1 - [F5GYU2_HUMAN]	11.7866	28.47	8	4	15.8354	B4DII5	cDNA FLJ53998, highly similar to Importin alpha-7 subunit OS=Homo sapiens PE=2 SV=1 - [B4DII5_HUMAN]	14.7189	12.95	16	5	59.6033	Q5JR07	Ras homolog gene family, member C (Fragment) OS=Homo sapiens GN=RHOC PE=2 SV=1 - [Q5JR07_HUMAN]	9.20049	27.56	10	3	14.3753	P53618	Coatomer subunit beta OS=Homo sapiens GN=COPB1 PE=1 SV=3 - [COPB_HUMAN]	15.1948	8.39	1	7	107.074	Q9NZB2	Constitutive coactivator of PPAR-gamma-like protein 1 OS=Homo sapiens GN=FAM120A PE=1 SV=2 - [F120A_HUMAN]	13.9419	6.08	1	5	121.811	B4DNN4	Ribonucleoside-diphosphate reductase OS=Homo sapiens PE=2 SV=1 - [B4DNN4_HUMAN]	24.9134	11.02	10	8	86.3966	Q13085	Acetyl-CoA carboxylase 1 OS=Homo sapiens GN=ACACA PE=1 SV=2 - [ACACA_HUMAN]	13.5569	2.86	9	5	265.385	P04040
B4E205	cDNA FLJ61651, highly similar to Protein transport protein Sec24A OS=Homo sapiens PE=2 SV=1 - [B4E205_HUMAN]	11.7654	3.27	2	2	96.2115	P42677	40S ribosomal protein S27 OS=Homo sapiens GN=RPS27 PE=1 SV=3 - [RS27_HUMAN]	14.6895	39.29	4	4	9.45484	Q9HAP1	Valosin-containing protein (Fragment) OS=Homo sapiens GN=VCP PE=2 SV=1 - [Q9HAP1_HUMAN]	9.17774	12.7	4	3	34.37	A8K6V3	cDNA FLJ78677, highly similar to Homo sapiens splicing factor 3b, subunit 3, 130kDa (SF3B3), mRNA OS=Homo sapiens PE=2 SV=1 - [A8K6V3_HUMAN]	15.1398	5.67	2	5	135.493	P30050	60S ribosomal protein L12 OS=Homo sapiens GN=RPL12 PE=1 SV=1 - [RL12_HUMAN]	13.8434	33.94	3	4	17.8075	Q9UQD4	SH3-containing Grb-2-like 1 protein OS=Homo sapiens PE=2 SV=1 - [Q9UQD4_HUMAN]	24.7489	17.56	13	6	39.8151	P08758	Annexin A5 OS=Homo sapiens GN=ANXA5 PE=1 SV=2 - [ANXA5_HUMAN]	13.4521	20.94	6	5	35.9144	B4E1R7
B7Z6M1	Plastin 3 OS=Homo sapiens GN=PLS3 PE=2 SV=1 - [B7Z6M1_HUMAN]	11.7413	9.74	6	5	65.5908	A8MUD9	Ribosomal protein L7 OS=Homo sapiens GN=RPL7 PE=3 SV=1 - [A8MUD9_HUMAN]	14.6849	25.48	5	5	24.4174	P29361	14-3-3 protein zeta/delta OS=Ovis aries GN=YWHAZ PE=1 SV=1 - [1433Z_SHEEP]	9.09214	14.69	4	2	27.8388	B4DRW3	cDNA FLJ57180, highly similar to TAR DNA-binding protein 43 OS=Homo sapiens PE=2 SV=1 - [B4DRW3_HUMAN]	15.1346	19.39	3	5	35.3677	P07737	Profilin-1 OS=Homo sapiens GN=PFN1 PE=1 SV=2 - [PROF1_HUMAN]	13.8134	37.86	3	5	15.0446	Q13148	TAR DNA-binding protein 43 OS=Homo sapiens GN=TARDBP PE=1 SV=1 - [TADBP_HUMAN]	24.4879	17.15	7	7	44.7113	P62753	40S ribosomal protein S6 OS=Homo sapiens GN=RPS6 PE=1 SV=1 - [RS6_HUMAN]	13.4432	21.69	5	5	28.663	F5H442
Q5U7I5	Transthyretin OS=Pan troglodytes GN=TTR PE=2 SV=1 - [TTHY_PANTR]	11.6678	9.52	1	2	15.8621	Q92900-2	Isoform 2 of Regulator of nonsense transcripts 1 OS=Homo sapiens GN=UPF1 - [RENT1_HUMAN]	14.6652	5.99	3	6	122.958	Q96J85	C-Mpl binding protein OS=Homo sapiens GN=LARP4 PE=2 SV=1 - [Q96J85_HUMAN]	9.03018	11.47	6	3	42.4777	Q1ELT0	MHC class I antigen OS=Homo sapiens GN=HLA-A PE=3 SV=1 - [Q1ELT0_HUMAN]	15.0654	16.71	1	5	40.9792	B4DMT8	cDNA FLJ52118, highly similar to 14-3-3 protein theta OS=Homo sapiens PE=2 SV=1 - [B4DMT8_HUMAN]	13.7099	20	5	4	23.8219	B4DM19	cDNA FLJ60127, highly similar to Ubiquilin-2 OS=Homo sapiens PE=2 SV=1 - [B4DM19_HUMAN]	24.3606	11.07	3	4	52.8877	A8MUD9	60S ribosomal protein L7 OS=Homo sapiens GN=RPL7 PE=3 SV=1 - [A8MUD9_HUMAN]	13.4338	20.19	3	5	24.4174	Q9UI10
C9JXB8	Ribosomal protein L24 OS=Homo sapiens GN=RPL24 PE=4 SV=1 - [C9JXB8_HUMAN]	11.6142	24.79	3	3	14.3598	Q7RTS7	Keratin, type II cytoskeletal 74 OS=Homo sapiens GN=KRT74 PE=1 SV=2 - [K2C74_HUMAN]	14.6404	7.18	13	5	57.8296	E9PCH7	Proteasome (prosome, macropain) inhibitor subunit 1 (PI31) OS=Homo sapiens GN=PSMF1 PE=4 SV=1 - [E9PCH7_HUMAN]	9.0273	16.36	5	2	18.3233	P17858	6-phosphofructokinase, liver type OS=Homo sapiens GN=PFKL PE=1 SV=6 - [K6PL_HUMAN]	14.9917	7.69	1	4	84.9642	B3KMB1	Structural maintenance of chromosomes protein OS=Homo sapiens PE=2 SV=1 - [B3KMB1_HUMAN]	13.6816	5.1	12	5	135.517	F8VXY0	Heterogeneous nuclear ribonucleoprotein A1 OS=Homo sapiens GN=HNRNPA1 PE=2 SV=1 - [F8VXY0_HUMAN]	24.3111	16.78	17	6	32.6597	Q14126	Desmoglein-2 OS=Homo sapiens GN=DSG2 PE=1 SV=2 - [DSG2_HUMAN]	13.4082	5.55	2	4	122.218	P31942
P15531	Nucleoside diphosphate kinase A OS=Homo sapiens GN=NME1 PE=1 SV=1 - [NDKA_HUMAN]	11.6142	34.87	2	4	17.1377	Q14677	Clathrin interactor 1 OS=Homo sapiens GN=CLINT1 PE=1 SV=1 - [EPN4_HUMAN]	14.4837	10.24	3	5	68.2158	B2RBI2	cDNA, FLJ95525, highly similar to Homo sapiens synapse associated protein 1, SAP47 homolog (Drosophila) (SYAP1), mRNA OS=Homo sapiens PE=2 SV=1 - [B2RBI2_HUMAN]	9.02617	8.81	3	2	39.8808	P14923	Junction plakoglobin OS=Homo sapiens GN=JUP PE=1 SV=3 - [PLAK_HUMAN]	14.9795	9.13	1	5	81.6927	P49411	Elongation factor Tu, mitochondrial OS=Homo sapiens GN=TUFM PE=1 SV=2 - [EFTU_HUMAN]	13.6737	11.95	1	4	49.5102	P80723	Brain acid soluble protein 1 OS=Homo sapiens GN=BASP1 PE=1 SV=2 - [BASP1_HUMAN]	24.2859	33.48	1	5	22.68	P17987	T-complex protein 1 subunit alpha OS=Homo sapiens GN=TCP1 PE=1 SV=1 - [TCPA_HUMAN]	13.3742	12.95	7	6	60.3056	P25685
C9J9K3	Ribosomal protein SA (Fragment) OS=Homo sapiens GN=RPSA PE=3 SV=1 - [C9J9K3_HUMAN]	11.5695	20.83	2	4	29.487	Q13347	Eukaryotic translation initiation factor 3 subunit I OS=Homo sapiens GN=EIF3I PE=1 SV=1 - [EIF3I_HUMAN]	14.3731	15.38	3	4	36.4786	A6NLC4	Uncharacterized protein OS=Homo sapiens GN=ATXN10 PE=2 SV=4 - [A6NLC4_HUMAN]	8.96902	10.46	2	3	46.2572	Q14677	Clathrin interactor 1 OS=Homo sapiens GN=CLINT1 PE=1 SV=1 - [EPN4_HUMAN]	14.9438	11.36	2	6	68.2158	Q2Q9H2	Glucose-6-phosphate 1-dehydrogenase (Fragment) OS=Homo sapiens GN=G6PD PE=2 SV=1 - [Q2Q9H2_HUMAN]	13.6249	14.74	11	6	54.7898	Q92973	Transportin-1 OS=Homo sapiens GN=TNPO1 PE=1 SV=2 - [TNPO1_HUMAN]	24.2672	6.9	9	6	102.289	M0QZC5	40S ribosomal protein S11 OS=Homo sapiens GN=RPS11 PE=4 SV=1 - [M0QZC5_HUMAN]	13.2151	55.08	4	9	13.9885	Q96CG1
Q1JQ76	Ribosomal protein (Fragment) OS=Homo sapiens GN=RPL10A PE=2 SV=1 - [Q1JQ76_HUMAN]	11.5468	27.18	2	4	23.5209	P47712	Cytosolic phospholipase A2 OS=Homo sapiens GN=PLA2G4A PE=1 SV=2 - [PA24A_HUMAN]	14.3011	10.01	4	6	85.1842	P62805	Histone H4 OS=Homo sapiens GN=HIST1H4A PE=1 SV=2 - [H4_HUMAN]	8.95997	51.46	2	5	11.3604	B4DZM8	Uncharacterized protein OS=Homo sapiens GN=PSMD5 PE=2 SV=1 - [B4DZM8_HUMAN]	14.9272	18.44	3	7	51.2798	B3KTJ9	cDNA FLJ38393 fis, clone FEBRA2007212 OS=Homo sapiens PE=2 SV=1 - [B3KTJ9_HUMAN]	13.508	7.8	5	6	102.866	P30050	60S ribosomal protein L12 OS=Homo sapiens GN=RPL12 PE=1 SV=1 - [RL12_HUMAN]	24.2509	33.94	3	4	17.8075	Q8IWR8	Ribosomal protein L19 (Fragment) OS=Homo sapiens PE=2 SV=1 - [Q8IWR8_HUMAN]	13.1923	15.61	5	3	20.8068	Q9Y3U8
P04632	Calpain small subunit 1 OS=Homo sapiens GN=CAPNS1 PE=1 SV=1 - [CPNS1_HUMAN]	11.5428	9.33	1	2	28.2977	P39023	60S ribosomal protein L3 OS=Homo sapiens GN=RPL3 PE=1 SV=2 - [RL3_HUMAN]	14.3001	11.66	12	5	46.0798	F5H3E1	Uncharacterized protein OS=Homo sapiens GN=CCAR1 PE=4 SV=1 - [F5H3E1_HUMAN]	8.95	7.04	4	3	63.994	P25705	ATP synthase subunit alpha, mitochondrial OS=Homo sapiens GN=ATP5A1 PE=1 SV=1 - [ATPA_HUMAN]	14.9067	12.12	1	6	59.7136	B2RDY9	Adenylyl cyclase-associated protein OS=Homo sapiens PE=2 SV=1 - [B2RDY9_HUMAN]	13.4996	14.95	16	5	51.5826	P55072	Transitional endoplasmic reticulum ATPase OS=Homo sapiens GN=VCP PE=1 SV=4 - [TERA_HUMAN]	24.2294	11.91	6	8	89.2657	Q07020	60S ribosomal protein L18 OS=Homo sapiens GN=RPL18 PE=1 SV=2 - [RL18_HUMAN]	13.1723	29.79	9	5	21.6211	O75886
F5GWK3	RNA binding motif protein 22 OS=Homo sapiens GN=RBM22 PE=4 SV=1 - [F5GWK3_HUMAN]	11.4607	6.74	3	3	41.1055	F8W7C6	Ribosomal protein L10 OS=Homo sapiens GN=RPL10 PE=4 SV=1 - [F8W7C6_HUMAN]	14.2771	27.61	6	4	18.5797	Q96PU8-5	Isoform 3 of Protein quaking OS=Homo sapiens GN=QKI - [QKI_HUMAN]	8.9042	17.35	6	4	35.2103	O60884	DnaJ homolog subfamily A member 2 OS=Homo sapiens GN=DNAJA2 PE=1 SV=1 - [DNJA2_HUMAN]	14.6721	15.78	1	5	45.7166	Q96CG1	ETF1 protein OS=Homo sapiens GN=ETF1 PE=2 SV=1 - [Q96CG1_HUMAN]	13.477	13.61	5	5	45.4343	H0Y4R1	Inosine-5'-monophosphate dehydrogenase 2 (Fragment) OS=Homo sapiens GN=IMPDH2 PE=3 SV=1 - [H0Y4R1_HUMAN]	24.1804	14.89	5	6	51.0352	B4DWQ5	cDNA FLJ51655, highly similar to Actin-like protein 2 OS=Homo sapiens PE=2 SV=1 - [B4DWQ5_HUMAN]	13.1602	16.07	5	4	34.4859	H7BZJ3
P61081	NEDD8-conjugating enzyme Ubc12 OS=Homo sapiens GN=UBE2M PE=1 SV=1 - [UBC12_HUMAN]	11.2736	25.14	1	4	20.8866	P05387	60S acidic ribosomal protein P2 OS=Homo sapiens GN=RPLP2 PE=1 SV=1 - [RLA2_HUMAN]	14.2663	30.43	1	3	11.6578	B7Z475	Transducin (beta)-like 1 X-linked receptor 1 OS=Homo sapiens GN=TBL1XR1 PE=2 SV=1 - [B7Z475_HUMAN]	8.84025	10.9	2	3	40.7308	A8K3Q9	cDNA FLJ76611, highly similar to Homo sapiens ribosomal protein L14 (RPL14), mRNA OS=Homo sapiens PE=2 SV=1 - [A8K3Q9_HUMAN]	14.6588	21.76	1	4	23.44	Q12904	Aminoacyl tRNA synthase complex-interacting multifunctional protein 1 OS=Homo sapiens GN=AIMP1 PE=1 SV=2 - [AIMP1_HUMAN]	13.4767	20.83	2	5	34.3311	P62266	40S ribosomal protein S23 OS=Homo sapiens GN=RPS23 PE=1 SV=3 - [RS23_HUMAN]	24.1201	29.37	5	5	15.7977	Q13283	Ras GTPase-activating protein-binding protein 1 OS=Homo sapiens GN=G3BP1 PE=1 SV=1 - [G3BP1_HUMAN]	13.1459	11.37	8	4	52.1321	B7Z3V1
Q86TL9	DnaJ (Hsp40) homolog, subfamily A, member 1, isoform CRA_b OS=Homo sapiens GN=DNAJA1 PE=2 SV=1 - [Q86TL9_HUMAN]	11.2535	14.2	2	4	37.0208	P61106	Ras-related protein Rab-14 OS=Homo sapiens GN=RAB14 PE=1 SV=4 - [RAB14_HUMAN]	14.1238	27.91	48	5	23.8819	B5MEH6	Zinc finger RNA binding protein OS=Homo sapiens GN=ZFR PE=4 SV=1 - [B5MEH6_HUMAN]	8.82599	3.13	3	2	115.082	B4DMT5	Uncharacterized protein OS=Homo sapiens GN=EIF3F PE=2 SV=1 - [B4DMT5_HUMAN]	14.6245	19.54	3	5	33.219	P62258	14-3-3 protein epsilon OS=Homo sapiens GN=YWHAE PE=1 SV=1 - [1433E_HUMAN]	13.3952	18.04	7	4	29.1554	O60884	DnaJ homolog subfamily A member 2 OS=Homo sapiens GN=DNAJA2 PE=1 SV=1 - [DNJA2_HUMAN]	24.1118	21.12	3	8	45.7166	P62750	60S ribosomal protein L23a OS=Homo sapiens GN=RPL23A PE=1 SV=1 - [RL23A_HUMAN]	13.0591	28.21	6	4	17.6841	B4E2D6
A8K3Z3	Proteasome (Prosome, macropain) 26S subunit, ATPase, 5, isoform CRA_b OS=Homo sapiens GN=PSMC5 PE=2 SV=1 - [A8K3Z3_HUMAN]	11.2299	13.82	2	4	44.7557	P37198	Nuclear pore glycoprotein p62 OS=Homo sapiens GN=NUP62 PE=1 SV=3 - [NUP62_HUMAN]	14.0005	10.15	1	4	53.2225	E7ETU5	RNA binding motif, single stranded interacting protein 1 OS=Homo sapiens GN=RBMS1 PE=4 SV=1 - [E7ETU5_HUMAN]	8.82559	11.62	4	3	40.1216	B4DY09	cDNA FLJ51660, highly similar to Interleukin enhancer-binding factor 2 OS=Homo sapiens PE=2 SV=1 - [B4DY09_HUMAN]	14.6066	17.05	4	5	38.8862	Q59ET3	Chaperonin containing TCP1, subunit 6A isoform a variant (Fragment) OS=Homo sapiens PE=2 SV=1 - [Q59ET3_HUMAN]	13.3361	13.23	6	6	57.7255	Q14247	Src substrate cortactin OS=Homo sapiens GN=CTTN PE=1 SV=2 - [SRC8_HUMAN]	24.1	14.55	8	6	61.5485	O75396	Vesicle-trafficking protein SEC22b OS=Homo sapiens GN=SEC22B PE=1 SV=4 - [SC22B_HUMAN]	13.0254	19.53	1	3	24.5775	B2RBR9
P25311	Zinc-alpha-2-glycoprotein OS=Homo sapiens GN=AZGP1 PE=1 SV=2 - [ZA2G_HUMAN]	11.1448	22.48	1	5	34.2371	Q96CG1	ETF1 protein OS=Homo sapiens GN=ETF1 PE=2 SV=1 - [Q96CG1_HUMAN]	13.9895	16.34	5	6	45.4343	O14979-3	Isoform 3 of Heterogeneous nuclear ribonucleoprotein D-like OS=Homo sapiens GN=HNRPDL - [HNRDL_HUMAN]	8.81183	13.93	4	2	27.1746	P42677	40S ribosomal protein S27 OS=Homo sapiens GN=RPS27 PE=1 SV=3 - [RS27_HUMAN]	14.4769	39.29	1	4	9.45484	B4DXY1	cDNA FLJ55045, highly similar to 26S proteasome non-ATPase regulatory subunit 2 OS=Homo sapiens PE=2 SV=1 - [B4DXY1_HUMAN]	13.3113	9.88	10	6	82.1267	P52597	Heterogeneous nuclear ribonucleoprotein F OS=Homo sapiens GN=HNRNPF PE=1 SV=3 - [HNRPF_HUMAN]	24.064	13.98	2	5	45.6429	H0YJ34	Fermitin family homolog 2 (Fragment) OS=Homo sapiens GN=FERMT2 PE=2 SV=1 - [H0YJ34_HUMAN]	12.9204	11.41	3	6	73.3064	P51149
Q08211	ATP-dependent RNA helicase A OS=Homo sapiens GN=DHX9 PE=1 SV=4 - [DHX9_HUMAN]	11.1299	3.62	1	4	140.869	F5H6W1	Eukaryotic translation initiation factor 2B, subunit 4 delta, 67kDa OS=Homo sapiens GN=EIF2B4 PE=3 SV=1 - [F5H6W1_HUMAN]	13.9594	11.73	10	4	57.4602	P62750	60S ribosomal protein L23a OS=Homo sapiens GN=RPL23A PE=1 SV=1 - [RL23A_HUMAN]	8.80801	21.15	3	4	17.6841	Q96TA1-2	Isoform 2 of Niban-like protein 1 OS=Homo sapiens GN=FAM129B - [NIBL1_HUMAN]	14.3803	9.14	2	6	82.6309	B4DJU4	cDNA FLJ53344, highly similar to Splicing factor 1 OS=Homo sapiens PE=2 SV=1 - [B4DJU4_HUMAN]	13.3089	8.57	4	4	67.3065	B4DS24	cDNA FLJ50635, highly similar to ATP-dependent RNA helicase DDX19A (EC 3.6.1.-) OS=Homo sapiens PE=2 SV=1 - [B4DS24_HUMAN]	23.9016	13.87	11	5	50.402	I3L3P7	40S ribosomal protein S15a OS=Homo sapiens GN=RPS15A PE=2 SV=1 - [I3L3P7_HUMAN]	12.8996	31	4	3	11.4702	Q9UHX1
Q9BSV4	SFPQ protein (Fragment) OS=Homo sapiens GN=SFPQ PE=2 SV=2 - [Q9BSV4_HUMAN]	11.0845	7.73	4	3	68.5879	P39019	40S ribosomal protein S19 OS=Homo sapiens GN=RPS19 PE=1 SV=2 - [RS19_HUMAN]	13.9155	22.76	2	4	16.0505	B4DF70	cDNA FLJ60461, highly similar to Peroxiredoxin-2 (EC 1.11.1.15) OS=Homo sapiens PE=2 SV=1 - [B4DF70_HUMAN]	8.79163	19.67	2	2	20.0946	O00425	Insulin-like growth factor 2 mRNA-binding protein 3 OS=Homo sapiens GN=IGF2BP3 PE=1 SV=2 - [IF2B3_HUMAN]	14.2893	8.81	1	4	63.6656	B4DQF6	Eukaryotic translation initiation factor 3 subunit L OS=Homo sapiens GN=EIF3L PE=2 SV=1 - [B4DQF6_HUMAN]	13.1759	8.66	9	3	62.6515	B4DMT5	Eukaryotic translation initiation factor 3 subunit F OS=Homo sapiens GN=EIF3F PE=2 SV=1 - [B4DMT5_HUMAN]	23.8424	16.94	4	4	33.219	Q2TSD2	Aging-associated gene 7 protein OS=Homo sapiens PE=2 SV=1 - [Q2TSD2_HUMAN]	12.8138	13.64	11	4	41.4361	B4DHE8
E9PMD7	Serine/threonine-protein phosphatase (Fragment) OS=Homo sapiens GN=PPP1CA PE=3 SV=1 - [E9PMD7_HUMAN]	11.0659	10.28	3	2	28.8793	Q08499-3	Isoform 10 of cAMP-specific 3',5'-cyclic phosphodiesterase 4D OS=Homo sapiens GN=PDE4D - [PDE4D_HUMAN]	13.9118	9.77	16	5	68.5638	B4E2E1	cDNA FLJ54322, highly similar to Protein transport protein Sec24B OS=Homo sapiens PE=2 SV=1 - [B4E2E1_HUMAN]	8.78918	3.23	5	1	96.1147	Q13501-2	Isoform 2 of Sequestosome-1 OS=Homo sapiens GN=SQSTM1 - [SQSTM_HUMAN]	14.2534	16.01	2	4	38.6045	B7Z7A9	Phosphoglycerate kinase OS=Homo sapiens GN=PGK1 PE=2 SV=1 - [B7Z7A9_HUMAN]	13.1646	17.74	7	4	41.4024	Q5T6F2	Ubiquitin-associated protein 2 OS=Homo sapiens GN=UBAP2 PE=1 SV=1 - [UBAP2_HUMAN]	23.7835	7.51	15	6	117.044	P62854	40S ribosomal protein S26 OS=Homo sapiens GN=RPS26 PE=1 SV=3 - [RS26_HUMAN]	12.7898	31.3	3	3	13.0071	F5H308
H0YAF8	Guanine nucleotide binding protein (G protein), beta polypeptide 2-like 1 (Fragment) OS=Homo sapiens GN=GNB2L1 PE=4 SV=1 - [H0YAF8_HUMAN]	11.0644	26.77	3	4	22.03	P52597	Heterogeneous nuclear ribonucleoprotein F OS=Homo sapiens GN=HNRNPF PE=1 SV=3 - [HNRPF_HUMAN]	13.8312	17.11	4	6	45.6429	D6R9P3	Heterogeneous nuclear ribonucleoprotein A/B OS=Homo sapiens GN=HNRNPAB PE=4 SV=1 - [D6R9P3_HUMAN]	8.75374	11.43	7	2	30.284	B2R6N6	cDNA, FLJ93036, highly similar to Homo sapiens tyrosine 3-monooxygenase/tryptophan 5-monooxygenaseactivation protein, eta polypeptide (YWHAH), mRNA OS=Homo sapiens PE=2 SV=1 - [B2R6N6_HUMAN]	14.0509	24.39	2	6	28.103	Q9Y285	Phenylalanine--tRNA ligase alpha subunit OS=Homo sapiens GN=FARSA PE=1 SV=3 - [SYFA_HUMAN]	13.108	11.61	4	5	57.5275	P37802	Transgelin-2 OS=Homo sapiens GN=TAGLN2 PE=1 SV=3 - [TAGL2_HUMAN]	23.7342	39.2	2	7	22.3772	P63173	60S ribosomal protein L38 OS=Homo sapiens GN=RPL38 PE=1 SV=2 - [RL38_HUMAN]	12.7631	50	4	4	8.21273	O43670
P05090	Apolipoprotein D OS=Homo sapiens GN=APOD PE=1 SV=1 - [APOD_HUMAN]	11.0616	23.81	2	4	21.2618	P26038	Moesin OS=Homo sapiens GN=MSN PE=1 SV=3 - [MOES_HUMAN]	13.7534	8.84	17	5	67.7778	O95628-8	Isoform 8 of CCR4-NOT transcription complex subunit 4 OS=Homo sapiens GN=CNOT4 - [CNOT4_HUMAN]	8.68807	4.54	5	2	70.2946	Q15758	Neutral amino acid transporter B(0) OS=Homo sapiens GN=SLC1A5 PE=1 SV=2 - [AAAT_HUMAN]	14.03	12.01	3	6	56.5623	B4E0N6	cDNA FLJ56280, highly similar to Endoplasmic reticulum-Golgi intermediate compartment protein 1 OS=Homo sapiens PE=2 SV=1 - [B4E0N6_HUMAN]	13.085	18.3	6	4	26.2424	B3KNN7	cDNA FLJ30049 fis, clone ADRGL1000033, highly similar to 26S proteasome non-ATPase regulatory subunit 3 OS=Homo sapiens PE=2 SV=1 - [B3KNN7_HUMAN]	23.606	18.07	9	8	57.1966	P46783	40S ribosomal protein S10 OS=Homo sapiens GN=RPS10 PE=1 SV=1 - [RS10_HUMAN]	12.7559	14.55	2	2	18.8859	H0Y4R1
E9PK06	Eukaryotic translation elongation factor 1 delta (guanine nucleotide exchange protein) (Fragment) OS=Homo sapiens GN=EEF1D PE=4 SV=1 - [E9PK06_HUMAN]	11.0465	26.43	15	3	15.3176	Q96KK5	Histone H2A type 1-H OS=Homo sapiens GN=HIST1H2AH PE=1 SV=3 - [H2A1H_HUMAN]	13.692	27.34	21	3	13.8978	P81605	Dermcidin OS=Homo sapiens GN=DCD PE=1 SV=2 - [DCD_HUMAN]	8.67375	22.73	2	3	11.2768	B3SXQ8	Collapsin response mediator protein 4 long variant OS=Homo sapiens GN=LCRMP PE=2 SV=1 - [B3SXQ8_HUMAN]	13.9748	9.06	2	5	73.8649	Q09666	Neuroblast differentiation-associated protein AHNAK OS=Homo sapiens GN=AHNAK PE=1 SV=2 - [AHNK_HUMAN]	13.0183	2.92	3	4	628.699	Q04917	14-3-3 protein eta OS=Homo sapiens GN=YWHAH PE=1 SV=4 - [1433F_HUMAN]	23.5443	19.11	2	5	28.201	D3YTB1	60S ribosomal protein L32 (Fragment) OS=Homo sapiens GN=RPL32 PE=2 SV=1 - [D3YTB1_HUMAN]	12.7108	22.56	3	4	15.6067	Q14247
B4E217	Uncharacterized protein OS=Homo sapiens GN=BAG4 PE=2 SV=1 - [B4E217_HUMAN]	11.0153	10.69	2	3	45.3815	Q01650	Large neutral amino acids transporter small subunit 1 OS=Homo sapiens GN=SLC7A5 PE=1 SV=2 - [LAT1_HUMAN]	13.6648	12.43	4	4	54.9743	B4DNK4	Pyruvate kinase OS=Homo sapiens PE=2 SV=1 - [B4DNK4_HUMAN]	8.62985	8.75	3	3	49.8659	Q4VBZ6	EEF1D protein OS=Homo sapiens GN=EEF1D PE=1 SV=1 - [Q4VBZ6_HUMAN]	13.9661	25.29	8	5	28.5404	K7ESI9	Dynamin-2 OS=Homo sapiens GN=DNM2 PE=3 SV=1 - [K7ESI9_HUMAN]	12.9849	7.02	6	5	97.9161	B3KQ59	RuvB-like 2 OS=Homo sapiens GN=RUVBL2 PE=2 SV=1 - [B3KQ59_HUMAN]	23.4171	21.77	6	7	46.277	Q1RMG2	Adenosylhomocysteinase OS=Homo sapiens GN=AHCY PE=2 SV=1 - [Q1RMG2_HUMAN]	12.6245	18.63	2	5	33.7892	B4E0U0
Q8IWR0	Zinc finger CCCH domain-containing protein 7A OS=Homo sapiens GN=ZC3H7A PE=1 SV=1 - [Z3H7A_HUMAN]	11.0119	6.39	1	5	110.466	P63173	60S ribosomal protein L38 OS=Homo sapiens GN=RPL38 PE=1 SV=2 - [RL38_HUMAN]	13.6381	50	1	4	8.21273	B4DWH5	cDNA FLJ53224, highly similar to Calpain-1 catalytic subunit (EC 3.4.22.52) OS=Homo sapiens PE=2 SV=1 - [B4DWH5_HUMAN]	8.55495	5.61	2	4	75.787	P50552	Vasodilator-stimulated phosphoprotein OS=Homo sapiens GN=VASP PE=1 SV=3 - [VASP_HUMAN]	13.9558	16.84	1	5	39.8051	P50552	Vasodilator-stimulated phosphoprotein OS=Homo sapiens GN=VASP PE=1 SV=3 - [VASP_HUMAN]	12.9432	18.16	2	5	39.8051	O60343	TBC1 domain family member 4 OS=Homo sapiens GN=TBC1D4 PE=1 SV=2 - [TBCD4_HUMAN]	23.3819	6.24	1	6	146.471	Q9NZB2	Constitutive coactivator of PPAR-gamma-like protein 1 OS=Homo sapiens GN=FAM120A PE=1 SV=2 - [F120A_HUMAN]	12.584	6.08	1	5	121.811	E7ETU5
Q9Y265-2	Isoform 2 of RuvB-like 1 OS=Homo sapiens GN=RUVBL1 - [RUVB1_HUMAN]	10.9851	17.62	3	5	42.1	B4DNN3	Uncharacterized protein OS=Homo sapiens GN=QARS PE=2 SV=1 - [B4DNN3_HUMAN]	13.5708	7.45	14	4	82.1931	Q5ISS9	Tyrosine 3-monooxygenase/tryptophan 5-monooxygenase activation protein theta isoform (Fragment) OS=Macaca fascicularis PE=2 SV=1 - [Q5ISS9_MACFA]	8.53026	19.07	2	3	26.6462	Q6FIG4	RAB1B protein OS=Homo sapiens GN=RAB1B PE=2 SV=1 - [Q6FIG4_HUMAN]	13.9286	38.81	2	6	22.1842	Q8WX93	Palladin OS=Homo sapiens GN=PALLD PE=1 SV=3 - [PALLD_HUMAN]	12.9407	5.71	5	7	150.47	B2R4M6	cDNA, FLJ92148, highly similar to Homo sapiens S100 calcium binding protein A9 (calgranulin B) (S100A9), mRNA OS=Homo sapiens PE=2 SV=1 - [B2R4M6_HUMAN]	23.2922	50.88	2	5	13.2015	B7Z254	Protein disulfide-isomerase A6 OS=Homo sapiens GN=PDIA6 PE=2 SV=1 - [B7Z254_HUMAN]	12.5374	13.73	6	4	47.8081	G3XAL7
P53621	Coatomer subunit alpha OS=Homo sapiens GN=COPA PE=1 SV=2 - [COPA_HUMAN]	10.8359	4	2	4	138.258	Q9Y5K5-2	Isoform 2 of Ubiquitin carboxyl-terminal hydrolase isozyme L5 OS=Homo sapiens GN=UCHL5 - [UCHL5_HUMAN]	13.5651	15.19	21	4	36.0562	P06493	Cyclin-dependent kinase 1 OS=Homo sapiens GN=CDK1 PE=1 SV=3 - [CDK1_HUMAN]	8.49762	11.78	2	3	34.0739	A8K3A8	cDNA FLJ75085, highly similar to Homo sapiens glutaminyl-tRNA synthetase (QARS), mRNA OS=Homo sapiens PE=2 SV=1 - [A8K3A8_HUMAN]	13.9282	11.1	3	7	87.7529	O00231	26S proteasome non-ATPase regulatory subunit 11 OS=Homo sapiens GN=PSMD11 PE=1 SV=3 - [PSD11_HUMAN]	12.8599	16.11	3	5	47.434	P38919	Eukaryotic initiation factor 4A-III OS=Homo sapiens GN=EIF4A3 PE=1 SV=4 - [IF4A3_HUMAN]	23.272	19.95	4	7	46.8412	J7FRP4	PA28 gamma variant 5 OS=Homo sapiens PE=2 SV=1 - [J7FRP4_HUMAN]	12.5339	24.71	7	3	19.8185	H3BN98
Q9Y678	Coatomer subunit gamma OS=Homo sapiens GN=COPG PE=1 SV=1 - [COPG_HUMAN]	10.8025	4.81	1	3	97.6555	P43490	Nicotinamide phosphoribosyltransferase OS=Homo sapiens GN=NAMPT PE=1 SV=1 - [NAMPT_HUMAN]	13.5503	12.42	5	4	55.4866	P62244	40S ribosomal protein S15a OS=Homo sapiens GN=RPS15A PE=1 SV=2 - [RS15A_HUMAN]	8.48994	23.85	1	3	14.83	B0V043	Valyl-tRNA synthetase OS=Homo sapiens GN=VARS PE=3 SV=1 - [B0V043_HUMAN]	13.891	5.78	2	5	140.377	P26038	Moesin OS=Homo sapiens GN=MSN PE=1 SV=3 - [MOES_HUMAN]	12.7941	11.96	23	7	67.7778	P31947	14-3-3 protein sigma OS=Homo sapiens GN=SFN PE=1 SV=1 - [1433S_HUMAN]	23.2369	23.39	2	6	27.7567	E9PNW4	CD59 glycoprotein OS=Homo sapiens GN=CD59 PE=2 SV=1 - [E9PNW4_HUMAN]	12.4457	29.63	3	3	11.9765	P51148
Q5IRN4	Myocyte enhancer factor 2D/deleted in azoospermia associated protein 1 fusion protein OS=Homo sapiens GN=MEF2D/DAZAP1 fusion PE=2 SV=1 - [Q5IRN4_HUMAN]	10.7524	9.92	1	4	50.3817	B2RDY9	Adenylyl cyclase-associated protein OS=Homo sapiens PE=2 SV=1 - [B2RDY9_HUMAN]	13.5192	12.42	21	4	51.5826	E7ERL0	Non-metastatic cells 1, protein (NM23A) expressed in OS=Homo sapiens GN=NME1 PE=3 SV=1 - [E7ERL0_HUMAN]	8.39831	19.42	5	2	15.2509	Q96KK5	Histone H2A type 1-H OS=Homo sapiens GN=HIST1H2AH PE=1 SV=3 - [H2A1H_HUMAN]	13.8529	27.34	11	3	13.8978	Q9BSV4	SFPQ protein (Fragment) OS=Homo sapiens GN=SFPQ PE=2 SV=2 - [Q9BSV4_HUMAN]	12.7172	8.52	5	5	68.5879	P62081	40S ribosomal protein S7 OS=Homo sapiens GN=RPS7 PE=1 SV=1 - [RS7_HUMAN]	23.2292	32.47	2	7	22.1133	B7ZL00	Protein transport protein Sec31A OS=Homo sapiens GN=SEC31A PE=2 SV=1 - [B7ZL00_HUMAN]	12.4149	5.49	7	5	127.475	E9PNW0
P15924	Desmoplakin OS=Homo sapiens GN=DSP PE=1 SV=3 - [DESP_HUMAN]	10.6623	2.06	1	6	331.569	B7Z6K2	cDNA FLJ58625, highly similar to Polypeptide N-acetylgalactosaminyltransferase 2 (EC 2.4.1.41) OS=Homo sapiens PE=2 SV=1 - [B7Z6K2_HUMAN]	13.3393	13.13	6	6	60.7874	B7Z2Z8	T-complex protein 1 subunit delta OS=Homo sapiens PE=2 SV=1 - [B7Z2Z8_HUMAN]	8.36974	7.87	6	3	52.2678	Q5ISS1	ADP-ribosylation factor 1 (Fragment) OS=Macaca fascicularis PE=2 SV=1 - [Q5ISS1_MACFA]	13.7499	29.24	4	4	19.5481	P61006	Ras-related protein Rab-8A OS=Homo sapiens GN=RAB8A PE=1 SV=1 - [RAB8A_HUMAN]	12.7073	24.15	17	4	23.6532	Q8IWR8	Ribosomal protein L19 (Fragment) OS=Homo sapiens PE=2 SV=1 - [Q8IWR8_HUMAN]	23.2257	20.23	5	4	20.8068	P61026	Ras-related protein Rab-10 OS=Homo sapiens GN=RAB10 PE=1 SV=1 - [RAB10_HUMAN]	12.3125	22.5	18	4	22.5266	K7EJB9
G3V1Y7	Myosin, light polypeptide 6, alkali, smooth muscle and non-muscle, isoform CRA_d OS=Homo sapiens GN=MYL6 PE=4 SV=1 - [G3V1Y7_HUMAN]	10.6588	27.83	11	3	13.1502	B4DRW3	cDNA FLJ57180, highly similar to TAR DNA-binding protein 43 OS=Homo sapiens PE=2 SV=1 - [B4DRW3_HUMAN]	13.3315	15.15	6	4	35.3677	P04075	Fructose-bisphosphate aldolase A OS=Homo sapiens GN=ALDOA PE=1 SV=2 - [ALDOA_HUMAN]	8.32922	10.71	1	3	39.3953	D6R9P3	Heterogeneous nuclear ribonucleoprotein A/B OS=Homo sapiens GN=HNRNPAB PE=4 SV=1 - [D6R9P3_HUMAN]	13.6406	16.07	7	4	30.284	Q71UM5	40S ribosomal protein S27-like OS=Homo sapiens GN=RPS27L PE=1 SV=3 - [RS27L_HUMAN]	12.507	30.95	4	3	9.47087	A8MXH2	Nucleosome assembly protein 1-like 4 (Fragment) OS=Homo sapiens GN=NAP1L4 PE=2 SV=2 - [A8MXH2_HUMAN]	23.1174	36.54	17	5	18.1412	D6R9P3	Heterogeneous nuclear ribonucleoprotein A/B OS=Homo sapiens GN=HNRNPAB PE=2 SV=1 - [D6R9P3_HUMAN]	12.1857	16.07	6	4	30.284	A8K134
F8VSC5	SCY1-like 2 (S. cerevisiae) (Fragment) OS=Homo sapiens GN=SCYL2 PE=4 SV=1 - [F8VSC5_HUMAN]	10.643	7.05	2	4	77.0044	Q8IWE2	Protein NOXP20 OS=Homo sapiens GN=FAM114A1 PE=1 SV=2 - [NXP20_HUMAN]	13.2886	13.68	5	5	60.7041	P18085	ADP-ribosylation factor 4 OS=Homo sapiens GN=ARF4 PE=1 SV=3 - [ARF4_HUMAN]	8.29122	18.89	1	2	20.4977	B4E0B7	Condensin complex subunit 1 OS=Homo sapiens PE=2 SV=1 - [B4E0B7_HUMAN]	13.5738	4.42	5	5	152.141	G3V576	Heterogeneous nuclear ribonucleoproteins C1/C2 OS=Homo sapiens GN=HNRNPC PE=4 SV=1 - [G3V576_HUMAN]	12.4798	22.08	24	4	25.2411	F8W840	YTH domain family protein 1 OS=Homo sapiens GN=YTHDF1 PE=2 SV=1 - [F8W840_HUMAN]	23.0489	16.11	4	6	55.3003	B7Z1C9	Chaperonin containing TCP1, subunit 7 (Eta), isoform CRA_a OS=Homo sapiens GN=CCT7 PE=2 SV=1 - [B7Z1C9_HUMAN]	12.175	16.14	7	6	46.0655	Q7L014
Q86X55-1	Isoform 1 of Histone-arginine methyltransferase CARM1 OS=Homo sapiens GN=CARM1 - [CARM1_HUMAN]	10.6294	7.69	2	4	63.4192	B4DV79	Eukaryotic translation initiation factor 3, subunit B OS=Homo sapiens GN=EIF3B PE=2 SV=1 - [B4DV79_HUMAN]	13.2724	6.91	10	5	85.0814	Q9UJY1	Heat shock protein beta-8 OS=Homo sapiens GN=HSPB8 PE=1 SV=1 - [HSPB8_HUMAN]	8.26878	18.88	1	3	21.5906	A8K521	cDNA FLJ78580, highly similar to Homo sapiens MCM5 minichromosome maintenance deficient 5, cell division cycle 46 (MCM5), mRNA OS=Homo sapiens PE=2 SV=1 - [A8K521_HUMAN]	13.5679	9.54	3	5	82.2172	F5ATB8	Nuclear receptor subfamily 3 group C member 1 variant DL-1 OS=Homo sapiens GN=NR3C1 PE=2 SV=1 - [F5ATB8_HUMAN]	12.434	10.27	11	5	72.0857	Q2NL95	DDX19B protein (Fragment) OS=Homo sapiens GN=DDX19B PE=2 SV=1 - [Q2NL95_HUMAN]	22.9915	13.81	14	5	50.6122	B4E1E0	cDNA FLJ58563, highly similar to CTP synthase 1 (EC 6.3.4.2) OS=Homo sapiens PE=2 SV=1 - [B4E1E0_HUMAN]	12.1581	10.11	4	4	49.6632	B2R9U2
Q9UBV8	Peflin OS=Homo sapiens GN=PEF1 PE=1 SV=1 - [PEF1_HUMAN]	10.6127	14.08	1	4	30.3613	A2BEY0	Valyl-tRNA synthetase (Fragment) OS=Homo sapiens GN=VARS PE=3 SV=1 - [A2BEY0_HUMAN]	13.269	3.64	8	3	131.747	Q5SX87	GDP dissociation inhibitor 2 (Fragment) OS=Homo sapiens GN=GDI2 PE=2 SV=1 - [Q5SX87_HUMAN]	8.26524	10.27	4	2	29.8372	B5BU72	Phosphatidylinositol-binding clathrin assembly protein isoform 2 OS=Homo sapiens GN=PICALM PE=2 SV=1 - [B5BU72_HUMAN]	13.5195	9.18	8	5	66.3518	Q14126	Desmoglein-2 OS=Homo sapiens GN=DSG2 PE=1 SV=2 - [DSG2_HUMAN]	12.379	5.55	2	4	122.218	Q10567	AP-1 complex subunit beta-1 OS=Homo sapiens GN=AP1B1 PE=1 SV=2 - [AP1B1_HUMAN]	22.9355	11.91	4	10	104.57	P51148	Ras-related protein Rab-5C OS=Homo sapiens GN=RAB5C PE=1 SV=2 - [RAB5C_HUMAN]	12.1381	17.59	1	3	23.4678	B4DMB1
P61019	Ras-related protein Rab-2A OS=Homo sapiens GN=RAB2A PE=1 SV=1 - [RAB2A_HUMAN]	10.5777	25.47	1	4	23.5308	B4DZM8	Uncharacterized protein OS=Homo sapiens GN=PSMD5 PE=2 SV=1 - [B4DZM8_HUMAN]	13.2557	16.7	5	6	51.2798	P52594-2	Isoform 2 of Arf-GAP domain and FG repeat-containing protein 1 OS=Homo sapiens GN=AGFG1 - [AGFG1_HUMAN]	8.2262	12.07	6	5	54.1484	P62854	40S ribosomal protein S26 OS=Homo sapiens GN=RPS26 PE=1 SV=3 - [RS26_HUMAN]	13.3791	36.52	2	3	13.0071	O15187	T-cluster binding protein OS=Homo sapiens GN=TIAL1 PE=2 SV=1 - [O15187_HUMAN]	12.3764	20	8	4	29.6308	P46779	60S ribosomal protein L28 OS=Homo sapiens GN=RPL28 PE=1 SV=3 - [RL28_HUMAN]	22.9273	34.31	7	6	15.7377	P84085	ADP-ribosylation factor 5 (Fragment) OS=Homo sapiens GN=ARF5 PE=2 SV=1 - [C9J1Z8_HUMAN]	12.1051	30.67	3	4	17.0959	P49755
B3KQT9	Protein disulfide isomerase family A, member 3 OS=Homo sapiens GN=PDIA3 PE=2 SV=1 - [B3KQT9_HUMAN]	10.5699	11.88	4	5	54.0685	B2R6N6	cDNA, FLJ93036, highly similar to Homo sapiens tyrosine 3-monooxygenase/tryptophan 5-monooxygenaseactivation protein, eta polypeptide (YWHAH), mRNA OS=Homo sapiens PE=2 SV=1 - [B2R6N6_HUMAN]	13.2463	20.33	16	5	28.103	E9PAV2	Proteasome (prosome, macropain) subunit, beta type, 5 OS=Homo sapiens GN=PSMB5 PE=3 SV=1 - [E9PAV2_HUMAN]	8.21788	21.88	2	3	17.7705	P62826	GTP-binding nuclear protein Ran OS=Homo sapiens GN=RAN PE=1 SV=3 - [RAN_HUMAN]	13.3677	27.31	2	5	24.4076	P51149	Ras-related protein Rab-7a OS=Homo sapiens GN=RAB7A PE=1 SV=1 - [RAB7A_HUMAN]	12.3727	22.71	7	4	23.4748	E7EWI9	Heterogeneous nuclear ribonucleoprotein A3 OS=Homo sapiens GN=HNRNPA3 PE=2 SV=1 - [E7EWI9_HUMAN]	22.8715	22.67	5	6	34.081	O75083	WD repeat-containing protein 1 OS=Homo sapiens GN=WDR1 PE=1 SV=4 - [WDR1_HUMAN]	12.0784	8.75	7	4	66.1519	P62854
G3XAL7	Putative uncharacterized protein LOC133619 OS=Homo sapiens GN=PRRC1 PE=4 SV=1 - [G3XAL7_HUMAN]	10.4545	8.99	5	3	46.4576	B7Z3Y3	cDNA FLJ50557, highly similar to Homo sapiens microtubule-associated protein 7 (MAP7), mRNA OS=Homo sapiens PE=2 SV=1 - [B7Z3Y3_HUMAN]	13.1393	9.45	14	5	66.9277	E9PP31	Uncharacterized protein OS=Homo sapiens GN=CAPRIN1 PE=4 SV=1 - [E9PP31_HUMAN]	8.21748	17.42	6	3	19.3687	B4DHR1	cDNA FLJ53009, highly similar to Calreticulin OS=Homo sapiens PE=2 SV=1 - [B4DHR1_HUMAN]	13.3366	18.87	3	3	24.2718	B4DVK5	cDNA FLJ54759, highly similar to DNA replication licensing factor MCM5 OS=Homo sapiens PE=2 SV=1 - [B4DVK5_HUMAN]	12.3303	14.32	8	5	44.9519	P62826	GTP-binding nuclear protein Ran OS=Homo sapiens GN=RAN PE=1 SV=3 - [RAN_HUMAN]	22.8055	24.54	6	5	24.4076	P26641	Elongation factor 1-gamma OS=Homo sapiens GN=EEF1G PE=1 SV=3 - [EF1G_HUMAN]	12.0523	15.56	4	7	50.0871	O43707
G3V1A4	Cofilin 1 (Non-muscle), isoform CRA_a OS=Homo sapiens GN=CFL1 PE=4 SV=1 - [G3V1A4_HUMAN]	10.3877	32.21	3	4	16.8008	B4DN70	cDNA FLJ51902, highly similar to ADP-ribosylation factor 1 OS=Homo sapiens PE=2 SV=1 - [B4DN70_HUMAN]	13.1003	23.53	17	3	19.445	B4DNY3	Adenylyl cyclase-associated protein OS=Homo sapiens PE=2 SV=1 - [B4DNY3_HUMAN]	8.20124	12.47	5	4	43.6787	E9PQD7	Ribosomal protein S2 OS=Homo sapiens GN=RPS2 PE=4 SV=1 - [E9PQD7_HUMAN]	13.324	29.36	5	6	25.1952	Q6DEN2	DPYSL3 protein OS=Homo sapiens GN=DPYSL3 PE=2 SV=1 - [Q6DEN2_HUMAN]	12.3119	8.92	3	4	73.864	B4DP09	cDNA FLJ53072, highly similar to Calponin-3 OS=Homo sapiens PE=2 SV=1 - [B4DP09_HUMAN]	22.6225	20.85	5	5	31.3762	B4DKS8	cDNA FLJ57121, highly similar to Heterogeneous nuclear ribonucleoprotein F OS=Homo sapiens PE=2 SV=1 - [B4DKS8_HUMAN]	11.977	12.72	2	4	37.2318	D6REM6
Q66K25	SAMD4B protein OS=Homo sapiens GN=SAMD4B PE=2 SV=1 - [Q66K25_HUMAN]	10.2636	6.33	2	3	72.4559	H0UID5	Adaptor-related protein complex 2, beta 1 subunit, isoform CRA_c OS=Homo sapiens GN=AP2B1 PE=4 SV=1 - [H0UID5_HUMAN]	12.9677	5.46	15	5	104.157	B3KWD0	cDNA FLJ42779 fis, clone BRAWH3005300, highly similar to Exportin-1 OS=Homo sapiens PE=2 SV=1 - [B3KWD0_HUMAN]	8.20092	4.32	4	3	82.366	C9JXB8	Ribosomal protein L24 OS=Homo sapiens GN=RPL24 PE=4 SV=1 - [C9JXB8_HUMAN]	13.2892	39.67	3	5	14.3598	P43243	Matrin-3 OS=Homo sapiens GN=MATR3 PE=1 SV=2 - [MATR3_HUMAN]	12.2368	7.44	10	4	94.5648	P62424	60S ribosomal protein L7a OS=Homo sapiens GN=RPL7A PE=1 SV=2 - [RL7A_HUMAN]	22.5759	34.59	4	8	29.977	O75533	Splicing factor 3B subunit 1 OS=Homo sapiens GN=SF3B1 PE=1 SV=3 - [SF3B1_HUMAN]	11.8979	6.6	5	6	145.738	O00148
G5EA18	Staufen, RNA binding protein, homolog 2 (Drosophila) OS=Homo sapiens GN=STAU2 PE=4 SV=1 - [G5EA18_HUMAN]	10.1542	15.46	16	3	31.7036	O43399	Tumor protein D54 OS=Homo sapiens GN=TPD52L2 PE=1 SV=2 - [TPD54_HUMAN]	12.901	25.24	10	4	22.2243	Q96CG1	ETF1 protein OS=Homo sapiens GN=ETF1 PE=2 SV=1 - [Q96CG1_HUMAN]	8.1522	9.16	3	3	45.4343	A8MUT5	Uncharacterized protein OS=Homo sapiens GN=DKC1 PE=4 SV=1 - [A8MUT5_HUMAN]	13.2832	10.7	2	4	57.6088	B2RCJ7	cDNA, FLJ96117, highly similar to Homo sapiens calpastatin (CAST), transcript variant 4, mRNA OS=Homo sapiens PE=2 SV=1 - [B2RCJ7_HUMAN]	12.231	10.17	25	5	63.5386	M0R3D6	60S ribosomal protein L18a (Fragment) OS=Homo sapiens GN=RPL18A PE=4 SV=1 - [M0R3D6_HUMAN]	22.4777	36.88	11	5	16.7038	A0PJ62	RPL14 protein (Fragment) OS=Homo sapiens GN=RPL14 PE=2 SV=1 - [A0PJ62_HUMAN]	11.8557	36.29	6	4	14.6019	B4DKN9
Q86TY5	Full-length cDNA clone CS0DI041YE05 of Placenta of Homo sapiens (human) OS=Homo sapiens PE=2 SV=1 - [Q86TY5_HUMAN]	10.1508	40.5	4	4	13.8882	H0YH81	ATP synthase, H+ transporting, mitochondrial F1 complex, beta polypeptide (Fragment) OS=Homo sapiens GN=ATP5B PE=4 SV=1 - [H0YH81_HUMAN]	12.8878	17.4	8	5	38.2249	B2R9U2	cDNA, FLJ94557, highly similar to Homo sapiens FK506 binding protein 4, 59kDa (FKBP4), mRNA OS=Homo sapiens PE=2 SV=1 - [B2R9U2_HUMAN]	7.97617	6.97	2	3	51.8021	P60953	Cell division control protein 42 homolog OS=Homo sapiens GN=CDC42 PE=1 SV=2 - [CDC42_HUMAN]	13.2494	19.9	5	3	21.245	P33176	Kinesin-1 heavy chain OS=Homo sapiens GN=KIF5B PE=1 SV=1 - [KINH_HUMAN]	12.2106	6.85	29	5	109.617	B4DWW8	cDNA FLJ59251, highly similar to U4/U6 small nuclear ribonucleoprotein Prp31 OS=Homo sapiens PE=2 SV=1 - [B4DWW8_HUMAN]	22.4719	14.44	8	6	50.1284	E7EQR4	Ezrin OS=Homo sapiens GN=EZR PE=2 SV=2 - [E7EQR4_HUMAN]	11.842	8.3	16	5	65.5386	P14923
B4DQW2	NOL1/NOP2/Sun domain family, member 2, isoform CRA_a OS=Homo sapiens GN=NSUN2 PE=2 SV=1 - [B4DQW2_HUMAN]	10.0343	6.01	3	4	82.3407	A8K9J7	Histone H2B OS=Homo sapiens PE=2 SV=1 - [A8K9J7_HUMAN]	12.8669	25.4	19	3	13.9876	A6ZKI3	Protein FAM127A OS=Homo sapiens GN=FAM127A PE=1 SV=1 - [F127A_HUMAN]	7.95807	26.55	1	3	13.1628	P39019	40S ribosomal protein S19 OS=Homo sapiens GN=RPS19 PE=1 SV=2 - [RS19_HUMAN]	13.2116	29.66	2	4	16.0505	B5BU99	High glucose-regulated protein 8 OS=Homo sapiens GN=YTHDF2 PE=2 SV=1 - [B5BU99_HUMAN]	12.1941	10.7	2	5	61.2822	B8ZZZ7	DNA polymerase-transactivated protein 6, isoform CRA_b OS=Homo sapiens GN=SPATS2L PE=4 SV=1 - [B8ZZZ7_HUMAN]	22.4018	17.47	10	7	54.9112	Q93020	GTP-binding regulatory protein Gi alpha-2 chain (Fragment) OS=Homo sapiens GN=WUGSC:H_LUCA16.1 PE=2 SV=2 - [Q93020_HUMAN]	11.8393	21.83	8	3	22.086	F8VSC5
B2R6J4	cDNA, FLJ92975, highly similar to Homo sapiens nucleosome assembly protein 1-like 4 (NAP1L4), mRNA OS=Homo sapiens PE=2 SV=1 - [B2R6J4_HUMAN]	10.0228	11.2	7	3	42.7689	C9JPM4	ADP-ribosylation factor 4 (Fragment) OS=Homo sapiens GN=ARF4 PE=3 SV=1 - [C9JPM4_HUMAN]	12.783	30.71	8	4	14.5438	H0YN73	Ribosomal protein S17 (Fragment) OS=Homo sapiens GN=RPS17L PE=4 SV=1 - [H0YN73_HUMAN]	7.90218	20.34	4	2	6.86169	P61221	ATP-binding cassette sub-family E member 1 OS=Homo sapiens GN=ABCE1 PE=1 SV=1 - [ABCE1_HUMAN]	13.1771	10.02	1	5	67.271	C9JB50	60S ribosomal protein L28 OS=Homo sapiens GN=RPL28 PE=4 SV=1 - [C9JB50_HUMAN]	12.1758	47.83	7	5	7.88318	B4DNY3	Adenylyl cyclase-associated protein OS=Homo sapiens PE=2 SV=1 - [B4DNY3_HUMAN]	22.3252	17.71	16	7	43.6787	D6RIU4	Vesicular integral-membrane protein VIP36 (Fragment) OS=Homo sapiens GN=LMAN2 PE=2 SV=1 - [D6RIU4_HUMAN]	11.8115	22.92	6	5	21.9336	B4E1K8
Q96HX3	Similar to ribophorin I (Fragment) OS=Homo sapiens PE=2 SV=1 - [Q96HX3_HUMAN]	9.96338	8.27	4	4	64.5417	A8K6V3	cDNA FLJ78677, highly similar to Homo sapiens splicing factor 3b, subunit 3, 130kDa (SF3B3), mRNA OS=Homo sapiens PE=2 SV=1 - [A8K6V3_HUMAN]	12.7774	5.59	6	5	135.493	P05109	Protein S100-A8 OS=Homo sapiens GN=S100A8 PE=1 SV=1 - [S10A8_HUMAN]	7.89179	23.66	1	2	10.8276	Q6NSF2	RPLP0 protein OS=Homo sapiens GN=RPLP0 PE=2 SV=1 - [Q6NSF2_HUMAN]	13.165	23.62	6	5	27.2813	P61026	Ras-related protein Rab-10 OS=Homo sapiens GN=RAB10 PE=1 SV=1 - [RAB10_HUMAN]	12.1524	22.5	18	4	22.5266	B4DKZ2	cDNA FLJ56653, highly similar to Ribosomal protein S6 kinase alpha-3 (EC 2.7.11.1) OS=Homo sapiens PE=2 SV=1 - [B4DKZ2_HUMAN]	22.3134	12.82	16	8	80.5448	Q9BQQ5	Ribosomal protein L27a OS=Homo sapiens GN=L27a PE=2 SV=1 - [Q9BQQ5_HUMAN]	11.7861	43.4	5	4	12.0074	B4DNY3
P10620	Microsomal glutathione S-transferase 1 OS=Homo sapiens GN=MGST1 PE=1 SV=1 - [MGST1_HUMAN]	9.93014	19.35	2	2	17.5872	B7Z8Y3	cDNA FLJ61696, highly similar to Double-stranded RNA-specific adenosine deaminase (EC 3.5.4.-) OS=Homo sapiens PE=2 SV=1 - [B7Z8Y3_HUMAN]	12.7407	6.6	10	4	106.949	B4DJ74	cDNA FLJ58398, highly similar to A-kinase anchor protein 8 OS=Homo sapiens PE=2 SV=1 - [B4DJ74_HUMAN]	7.88748	4.96	2	2	65.1799	E7EMV0	Diaphanous homolog 1 (Drosophila) OS=Homo sapiens GN=DIAPH1 PE=4 SV=1 - [E7EMV0_HUMAN]	13.1648	7.65	10	5	94.5346	B4DV79	Eukaryotic translation initiation factor 3 subunit B OS=Homo sapiens GN=EIF3B PE=2 SV=1 - [B4DV79_HUMAN]	12.0672	7.72	7	4	85.0814	H3BN98	Uncharacterized protein (Fragment) OS=Homo sapiens PE=4 SV=2 - [H3BN98_HUMAN]	22.2313	19.41	5	5	27.1504	B4DNN3	cDNA FLJ54453, highly similar to Glutaminyl-tRNA synthetase (EC 6.1.1.18) OS=Homo sapiens PE=2 SV=1 - [B4DNN3_HUMAN]	11.7782	8	10	4	82.1931	P07737
E7EPW1	Uncharacterized protein OS=Homo sapiens GN=GAPDH PE=3 SV=1 - [E7EPW1_HUMAN]	9.9111	25.47	8	3	17.2948	P30041	Peroxiredoxin-6 OS=Homo sapiens GN=PRDX6 PE=1 SV=3 - [PRDX6_HUMAN]	12.6624	25	2	6	25.0192	Q15459	Splicing factor 3A subunit 1 OS=Homo sapiens GN=SF3A1 PE=1 SV=1 - [SF3A1_HUMAN]	7.88414	4.67	1	3	88.8305	Q8NE71-2	Isoform 2 of ATP-binding cassette sub-family F member 1 OS=Homo sapiens GN=ABCF1 - [ABCF1_HUMAN]	13.1301	8.43	2	6	91.6235	P10620	Microsomal glutathione S-transferase 1 OS=Homo sapiens GN=MGST1 PE=1 SV=1 - [MGST1_HUMAN]	12.0669	19.35	4	3	17.5872	B4E205	cDNA FLJ61651, highly similar to Protein transport protein Sec24A OS=Homo sapiens PE=2 SV=1 - [B4E205_HUMAN]	22.219	9.57	2	7	96.2115	B4DJU4	cDNA FLJ53344, highly similar to Splicing factor 1 OS=Homo sapiens PE=2 SV=1 - [B4DJU4_HUMAN]	11.775	6.83	4	3	67.3065	D6RF44
C9JIG9	Oxidative-stress responsive 1 OS=Homo sapiens GN=OXSR1 PE=4 SV=1 - [C9JIG9_HUMAN]	9.91026	7.48	2	3	51.8239	O95782-2	Isoform B of AP-2 complex subunit alpha-1 OS=Homo sapiens GN=AP2A1 - [AP2A1_HUMAN]	12.5521	6.7	15	5	105.295	E7EMV7	TNFAIP3 interacting protein 1 OS=Homo sapiens GN=TNIP1 PE=4 SV=1 - [E7EMV7_HUMAN]	7.82529	7.11	21	3	55.664	P49588	Alanine--tRNA ligase, cytoplasmic OS=Homo sapiens GN=AARS PE=1 SV=2 - [SYAC_HUMAN]	12.9731	8.88	3	7	106.743	P46783	40S ribosomal protein S10 OS=Homo sapiens GN=RPS10 PE=1 SV=1 - [RS10_HUMAN]	12.0442	23.64	4	4	18.8859	Q9UI10	Translation initiation factor eIF-2B subunit delta OS=Homo sapiens GN=EIF2B4 PE=1 SV=2 - [EI2BD_HUMAN]	22.193	13.96	9	6	57.5213	Q96KK5	Histone H2A type 1-H OS=Homo sapiens GN=HIST1H2AH PE=1 SV=3 - [H2A1H_HUMAN]	11.6901	21.88	11	2	13.8978	Q8IWR8
B7Z8Y3	cDNA FLJ61696, highly similar to Double-stranded RNA-specific adenosine deaminase (EC 3.5.4.-) OS=Homo sapiens PE=2 SV=1 - [B7Z8Y3_HUMAN]	9.89616	5.26	2	4	106.949	F5GYN4	OTU domain, ubiquitin aldehyde binding 1 OS=Homo sapiens GN=OTUB1 PE=4 SV=1 - [F5GYN4_HUMAN]	12.5405	21.58	10	4	28.033	D3DN77	HCG2022736, isoform CRA_a OS=Homo sapiens GN=hCG_2022736 PE=4 SV=1 - [D3DN77_HUMAN]	7.79343	16.79	6	5	30.749	B4E2E1	cDNA FLJ54322, highly similar to Protein transport protein Sec24B OS=Homo sapiens PE=2 SV=1 - [B4E2E1_HUMAN]	12.932	7.38	5	5	96.1147	B3KM36	cDNA FLJ10153 fis, clone HEMBA1003417, highly similar to BAG family molecular chaperone regulator 2 OS=Homo sapiens PE=2 SV=1 - [B3KM36_HUMAN]	12.0171	16.59	4	4	23.6972	B4DFG4	cDNA FLJ58801, highly similar to Interleukin enhancer-binding factor 3 OS=Homo sapiens PE=2 SV=1 - [B4DFG4_HUMAN]	22.1418	13.64	8	6	54.6725	Q9Y277	Voltage-dependent anion-selective channel protein 3 OS=Homo sapiens GN=VDAC3 PE=1 SV=1 - [VDAC3_HUMAN]	11.6894	13.07	7	3	30.6393	P29373
G5E9C2	Nuclear factor of kappa light polypeptide gene enhancer in B-cells inhibitor, beta OS=Homo sapiens GN=NFKBIB PE=4 SV=1 - [G5E9C2_HUMAN]	9.88081	13.73	4	3	32.7801	P62081	40S ribosomal protein S7 OS=Homo sapiens GN=RPS7 PE=1 SV=1 - [RS7_HUMAN]	12.526	21.13	2	5	22.1133	Q96CJ7	EYA4 protein (Fragment) OS=Homo sapiens GN=EYA4 PE=2 SV=2 - [Q96CJ7_HUMAN]	7.78547	7.32	11	2	45.4482	P46781	40S ribosomal protein S9 OS=Homo sapiens GN=RPS9 PE=1 SV=3 - [RS9_HUMAN]	12.8866	24.74	1	6	22.5776	P61254	60S ribosomal protein L26 OS=Homo sapiens GN=RPL26 PE=1 SV=1 - [RL26_HUMAN]	12.0129	28.97	8	5	17.2475	P17858	6-phosphofructokinase, liver type OS=Homo sapiens GN=PFKL PE=1 SV=6 - [K6PL_HUMAN]	22.0567	11.41	4	6	84.9642	A8K2S1	cDNA FLJ75258, highly similar to Homo sapiens phospholipase A2, group IVA (cytosolic, calcium-dependent) (PLA2G4A), mRNA OS=Homo sapiens PE=2 SV=1 - [A8K2S1_HUMAN]	11.6832	7.08	4	4	85.1823	Q9UDY4
C9J4Z3	Ribosomal protein L37a, isoform CRA_c OS=Homo sapiens GN=RPL37A PE=4 SV=1 - [C9J4Z3_HUMAN]	9.71307	38.24	2	2	7.61894	B4DLN6	cDNA FLJ59033, highly similar to Protein disulfide-isomerase (EC 5.3.4.1) OS=Homo sapiens PE=2 SV=1 - [B4DLN6_HUMAN]	12.4054	11.97	10	5	51.1556	Q9Y6I3-3	Isoform 3 of Epsin-1 OS=Homo sapiens GN=EPN1 - [EPN1_HUMAN]	7.7777	5.82	3	3	57.4684	P30041	Peroxiredoxin-6 OS=Homo sapiens GN=PRDX6 PE=1 SV=3 - [PRDX6_HUMAN]	12.8504	25	1	6	25.0192	B4DJW8	cDNA FLJ55697, highly similar to Protein transport protein Sec23B OS=Homo sapiens PE=2 SV=1 - [B4DJW8_HUMAN]	12.0086	10.81	5	6	84.4345	P51148	Ras-related protein Rab-5C OS=Homo sapiens GN=RAB5C PE=1 SV=2 - [RAB5C_HUMAN]	21.8834	21.3	10	4	23.4678	Q9Y266	Nuclear migration protein nudC OS=Homo sapiens GN=NUDC PE=1 SV=1 - [NUDC_HUMAN]	11.5936	21.15	2	6	38.2191	B7Z5W0
Q9BWF3	RNA-binding protein 4 OS=Homo sapiens GN=RBM4 PE=1 SV=1 - [RBM4_HUMAN]	9.66627	18.68	1	6	40.2887	P31946-2	Isoform Short of 14-3-3 protein beta/alpha OS=Homo sapiens GN=YWHAB - [1433B_HUMAN]	12.3821	19.67	15	5	27.8327	C9J4Z3	Ribosomal protein L37a, isoform CRA_c OS=Homo sapiens GN=RPL37A PE=4 SV=1 - [C9J4Z3_HUMAN]	7.68368	55.88	2	3	7.61894	P37802	Transgelin-2 OS=Homo sapiens GN=TAGLN2 PE=1 SV=3 - [TAGL2_HUMAN]	12.8242	28.14	1	5	22.3772	O00425	Insulin-like growth factor 2 mRNA-binding protein 3 OS=Homo sapiens GN=IGF2BP3 PE=1 SV=2 - [IF2B3_HUMAN]	12.0002	7.94	1	3	63.6656	Q05BV1	SMC2 protein (Fragment) OS=Homo sapiens GN=SMC2 PE=2 SV=1 - [Q05BV1_HUMAN]	21.8725	11.78	13	8	88.6185	B4DRW3	cDNA FLJ57180, highly similar to TAR DNA-binding protein 43 OS=Homo sapiens PE=2 SV=1 - [B4DRW3_HUMAN]	11.5533	14.24	7	4	35.3677	Q9BSV4
B5MEH6	Zinc finger RNA binding protein OS=Homo sapiens GN=ZFR PE=4 SV=1 - [B5MEH6_HUMAN]	9.61372	3.69	3	3	115.082	B5BTZ6	Signal transducer and activator of transcription 3 isoform 2 OS=Homo sapiens GN=STAT3 PE=2 SV=1 - [B5BTZ6_HUMAN]	12.3422	7.15	7	4	87.9433	Q99567	Nuclear pore complex protein Nup88 OS=Homo sapiens GN=NUP88 PE=1 SV=2 - [NUP88_HUMAN]	7.56436	5.8	1	3	83.4888	C5J3Z8	MHC class I antigen OS=Homo sapiens GN=HLA-B PE=3 SV=1 - [C5J3Z8_HUMAN]	12.8241	13.81	6	4	40.313	I3L2P8	Protein disulfide-isomerase OS=Homo sapiens GN=P4HB PE=2 SV=1 - [I3L2P8_HUMAN]	11.9927	10.67	12	4	50.9936	P43243	Matrin-3 OS=Homo sapiens GN=MATR3 PE=1 SV=2 - [MATR3_HUMAN]	21.843	11.33	11	8	94.5648	G5E9S1	Eukaryotic translation initiation factor 4 gamma 1 OS=Homo sapiens GN=EIF4G1 PE=4 SV=1 - [G5E9S1_HUMAN]	11.5411	4.63	17	5	154.837	E9PPG9
A8K0C2	cDNA FLJ75950 OS=Homo sapiens PE=2 SV=1 - [A8K0C2_HUMAN]	9.60983	17.95	2	3	28.7907	O75340	Programmed cell death protein 6 OS=Homo sapiens GN=PDCD6 PE=1 SV=1 - [PDCD6_HUMAN]	12.3357	26.18	5	5	21.8548	B4DQW2	NOL1/NOP2/Sun domain family, member 2, isoform CRA_a OS=Homo sapiens GN=NSUN2 PE=2 SV=1 - [B4DQW2_HUMAN]	7.52826	5.19	3	3	82.3407	Q9BVP2-2	Isoform 2 of Guanine nucleotide-binding protein-like 3 OS=Homo sapiens GN=GNL3 - [GNL3_HUMAN]	12.7416	11.17	2	5	60.5025	E9PBS1	Phosphoribosylaminoimidazole carboxylase (Fragment) OS=Homo sapiens GN=PAICS PE=2 SV=1 - [E9PBS1_HUMAN]	11.9865	15.98	4	5	45.6224	P39019	40S ribosomal protein S19 OS=Homo sapiens GN=RPS19 PE=1 SV=2 - [RS19_HUMAN]	21.7676	42.76	6	7	16.0505	A1JUI8	Chaperonin subunit 6A (Fragment) OS=Homo sapiens GN=CCT6A PE=2 SV=1 - [A1JUI8_HUMAN]	11.5022	14.96	6	6	53.6472	P05109
Q13151	Heterogeneous nuclear ribonucleoprotein A0 OS=Homo sapiens GN=HNRNPA0 PE=1 SV=1 - [ROA0_HUMAN]	9.54649	12.13	1	3	30.8218	D3YTB1	Ribosomal protein L32 (Fragment) OS=Homo sapiens GN=RPL32 PE=4 SV=1 - [D3YTB1_HUMAN]	12.3218	27.82	3	3	15.6067	Q5R370	Calcyclin binding protein OS=Homo sapiens GN=CACYBP PE=2 SV=1 - [Q5R370_HUMAN]	7.51056	11.35	4	2	21.2149	B4DS27	cDNA FLJ51288, highly similar to Kinesin heavy chain OS=Homo sapiens PE=2 SV=1 - [B4DS27_HUMAN]	12.7414	8.9	4	3	49.9481	D6R9P3	Heterogeneous nuclear ribonucleoprotein A/B OS=Homo sapiens GN=HNRNPAB PE=2 SV=1 - [D6R9P3_HUMAN]	11.9808	16.07	6	4	30.284	Q9UHX1	Poly(U)-binding-splicing factor PUF60 OS=Homo sapiens GN=PUF60 PE=1 SV=1 - [PUF60_HUMAN]	21.556	11.45	4	5	59.8376	B3KVX6	cDNA FLJ41699 fis, clone HCHON2004776, highly similar to Homo sapiens cytoskeleton-associated protein 4 (CKAP4), mRNA OS=Homo sapiens PE=2 SV=1 - [B3KVX6_HUMAN]	11.4164	9.79	4	4	58.1158	E5RI99
B2R9U2	cDNA, FLJ94557, highly similar to Homo sapiens FK506 binding protein 4, 59kDa (FKBP4), mRNA OS=Homo sapiens PE=2 SV=1 - [B2R9U2_HUMAN]	9.47613	11.55	2	5	51.8021	Q7Z759	CCT8 protein OS=Homo sapiens GN=CCT8 PE=2 SV=1 - [Q7Z759_HUMAN]	12.2922	11.27	6	5	54.0717	P53396-2	Isoform 2 of ATP-citrate synthase OS=Homo sapiens GN=ACLY - [ACLY_HUMAN]	7.45116	4.03	4	3	119.695	E9PLA9	Cell cycle associated protein 1 (Fragment) OS=Homo sapiens GN=CAPRIN1 PE=4 SV=1 - [E9PLA9_HUMAN]	12.7411	27.42	3	5	20.2234	B3KY03	Condensin complex subunit 1 OS=Homo sapiens PE=2 SV=1 - [B3KY03_HUMAN]	11.9627	4.11	7	4	152.763	C9J9K3	40S ribosomal protein SA (Fragment) OS=Homo sapiens GN=RPSA PE=2 SV=1 - [C9J9K3_HUMAN]	21.4766	18.18	4	4	29.487	B4E0N6	cDNA FLJ56280, highly similar to Endoplasmic reticulum-Golgi intermediate compartment protein 1 OS=Homo sapiens PE=2 SV=1 - [B4E0N6_HUMAN]	11.3952	17.87	2	4	26.2424	F8VUA6
Q5D862	Filaggrin-2 OS=Homo sapiens GN=FLG2 PE=1 SV=1 - [FILA2_HUMAN]	9.45778	2.05	1	5	247.928	H0YLU7	Electron-transfer-flavoprotein, alpha polypeptide (Fragment) OS=Homo sapiens GN=ETFA PE=4 SV=1 - [H0YLU7_HUMAN]	12.2786	15.84	7	3	31.7197	E9PJD9	Ribosomal protein L27a OS=Homo sapiens GN=RPL27A PE=3 SV=1 - [E9PJD9_HUMAN]	7.43615	36.26	6	3	10.1206	P26038	Moesin OS=Homo sapiens GN=MSN PE=1 SV=3 - [MOES_HUMAN]	12.7347	7.97	1	5	67.7778	B4E205	cDNA FLJ61651, highly similar to Protein transport protein Sec24A OS=Homo sapiens PE=2 SV=1 - [B4E205_HUMAN]	11.9265	5.95	2	4	96.2115	Q08211	ATP-dependent RNA helicase A OS=Homo sapiens GN=DHX9 PE=1 SV=4 - [DHX9_HUMAN]	21.4372	6.93	4	8	140.869	E7EWI9	Heterogeneous nuclear ribonucleoprotein A3 OS=Homo sapiens GN=HNRNPA3 PE=2 SV=1 - [E7EWI9_HUMAN]	11.3941	19.25	5	5	34.081	F8W1U7
Q15323	Keratin, type I cuticular Ha1 OS=Homo sapiens GN=KRT31 PE=2 SV=3 - [K1H1_HUMAN]	9.41691	10.1	1	4	47.2071	P13489	Ribonuclease inhibitor OS=Homo sapiens GN=RNH1 PE=1 SV=2 - [RINI_HUMAN]	12.2471	11.5	8	4	49.9411	P26599	Polypyrimidine tract-binding protein 1 OS=Homo sapiens GN=PTBP1 PE=1 SV=1 - [PTBP1_HUMAN]	7.42082	5.27	3	3	57.1856	C9J9K3	Ribosomal protein SA (Fragment) OS=Homo sapiens GN=RPSA PE=3 SV=1 - [C9J9K3_HUMAN]	12.7274	18.56	3	4	29.487	K7EIV0	Calpain small subunit 1 OS=Homo sapiens GN=CAPNS1 PE=4 SV=1 - [K7EIV0_HUMAN]	11.9031	23.32	7	4	21.7986	J3KR24	Isoleucine--tRNA ligase, cytoplasmic OS=Homo sapiens GN=IARS PE=4 SV=1 - [J3KR24_HUMAN]	21.3242	6.25	10	6	131.68	B4DXY1	cDNA FLJ55045, highly similar to 26S proteasome non-ATPase regulatory subunit 2 OS=Homo sapiens PE=2 SV=1 - [B4DXY1_HUMAN]	11.3758	8.01	10	5	82.1267	F8VZJ2
P06733	Alpha-enolase OS=Homo sapiens GN=ENO1 PE=1 SV=2 - [ENOA_HUMAN]	9.41593	10.6	1	3	47.1393	O14980	Exportin-1 OS=Homo sapiens GN=XPO1 PE=1 SV=1 - [XPO1_HUMAN]	12.2351	6.35	9	6	123.306	F5H442	Tumor susceptibility gene 101 OS=Homo sapiens GN=TSG101 PE=4 SV=1 - [F5H442_HUMAN]	7.40573	14.52	2	5	40.8917	B4DII5	cDNA FLJ53998, highly similar to Importin alpha-7 subunit OS=Homo sapiens PE=2 SV=1 - [B4DII5_HUMAN]	12.7014	13.13	5	5	59.6033	A8K7W3	cDNA FLJ75780, highly similar to Homo sapiens SGT1, suppressor of G2 allele of SKP1 (SUGT1), mRNA OS=Homo sapiens PE=2 SV=1 - [A8K7W3_HUMAN]	11.8821	21.02	6	5	37.8099	A5YM50	RAB11B protein OS=Homo sapiens GN=RAB11B PE=2 SV=1 - [A5YM50_HUMAN]	21.2859	28.44	12	6	24.5015	E4W6B6	RPL27/NME2 fusion protein (Fragment) OS=Homo sapiens GN=RPL27 PE=2 SV=1 - [E4W6B6_HUMAN]	11.3657	30.16	5	4	14.248	P05556
Q5DT20	Hornerin OS=Homo sapiens GN=HRNR PE=2 SV=1 - [Q5DT20_HUMAN]	9.34327	2.84	2	3	282.199	D3DP75	RAB3 GTPase activating protein subunit 1 (Catalytic), isoform CRA_a OS=Homo sapiens GN=RAB3GAP1 PE=4 SV=1 - [D3DP75_HUMAN]	12.1446	6.47	4	4	99.0723	P42771	Cyclin-dependent kinase inhibitor 2A, isoforms 1/2/3 OS=Homo sapiens GN=CDKN2A PE=1 SV=2 - [CD2A1_HUMAN]	7.3942	18.59	2	2	16.5224	P16615-2	Isoform 2 of Sarcoplasmic/endoplasmic reticulum calcium ATPase 2 OS=Homo sapiens GN=ATP2A2 - [AT2A2_HUMAN]	12.6849	5.02	5	4	109.62	P61106	Ras-related protein Rab-14 OS=Homo sapiens GN=RAB14 PE=1 SV=4 - [RAB14_HUMAN]	11.8425	26.51	1	4	23.8819	P21281	V-type proton ATPase subunit B, brain isoform OS=Homo sapiens GN=ATP6V1B2 PE=1 SV=3 - [VATB2_HUMAN]	21.2229	11.74	7	5	56.4649	A8K7T0	Kynureninase OS=Homo sapiens GN=KYNU PE=2 SV=1 - [A8K7T0_HUMAN]	11.2721	12.47	6	5	52.3352	P55072
D3DR86	Nuclear factor of kappa light polypeptide gene enhancer in B-cells 2 (P49/p100), isoform CRA_c OS=Homo sapiens GN=NFKB2 PE=4 SV=1 - [D3DR86_HUMAN]	9.31788	12.66	4	4	44.2254	P35998	26S protease regulatory subunit 7 OS=Homo sapiens GN=PSMC2 PE=1 SV=3 - [PRS7_HUMAN]	12.1406	10.85	5	4	48.6031	E4W6B6	RPL27/NME2 fusion protein (Fragment) OS=Homo sapiens GN=RPL27 PE=2 SV=1 - [E4W6B6_HUMAN]	7.35915	22.22	3	3	14.248	P28340	DNA polymerase delta catalytic subunit OS=Homo sapiens GN=POLD1 PE=1 SV=2 - [DPOD1_HUMAN]	12.6737	4.97	2	4	123.553	K7EMA7	60S ribosomal protein L23a OS=Homo sapiens GN=RPL23A PE=3 SV=1 - [K7EMA7_HUMAN]	11.8094	47.14	6	4	7.91839	Q9UDY4	DnaJ homolog subfamily B member 4 OS=Homo sapiens GN=DNAJB4 PE=1 SV=1 - [DNJB4_HUMAN]	21.1393	14.84	4	4	37.7831	Q12904	Aminoacyl tRNA synthase complex-interacting multifunctional protein 1 OS=Homo sapiens GN=AIMP1 PE=1 SV=2 - [AIMP1_HUMAN]	11.2709	21.15	2	5	34.3311	C9J0D1
Q15293	Reticulocalbin-1 OS=Homo sapiens GN=RCN1 PE=1 SV=1 - [RCN1_HUMAN]	9.26225	12.39	1	3	38.8662	Q5ISS5	Ribosomal protein S5 (Fragment) OS=Macaca fascicularis PE=2 SV=1 - [Q5ISS5_MACFA]	12.1268	16.77	3	2	18.6808	P46783	40S ribosomal protein S10 OS=Homo sapiens GN=RPS10 PE=1 SV=1 - [RS10_HUMAN]	7.33549	14.55	2	2	18.8859	B4DX55	cDNA FLJ58171, moderately similar to Melanoma-associated antigen D2 OS=Homo sapiens PE=2 SV=1 - [B4DX55_HUMAN]	12.6378	10.96	5	5	55.4662	B3KM89	cDNA FLJ10528 fis, clone NT2RP2000943, highly similar to Protein transport protein Sec24D OS=Homo sapiens PE=2 SV=1 - [B3KM89_HUMAN]	11.7459	6.95	7	5	100.183	B2RBI2	cDNA, FLJ95525, highly similar to Homo sapiens synapse associated protein 1, SAP47 homolog (Drosophila) (SYAP1), mRNA OS=Homo sapiens PE=2 SV=1 - [B2RBI2_HUMAN]	20.9339	9.94	4	4	39.8808	B7Z4V2	cDNA FLJ51907, highly similar to Stress-70 protein, mitochondrial OS=Homo sapiens PE=2 SV=1 - [B7Z4V2_HUMAN]	11.2512	8.87	5	4	72.3561	O75340
P62269	40S ribosomal protein S18 OS=Homo sapiens GN=RPS18 PE=1 SV=3 - [RS18_HUMAN]	9.1974	23.03	1	4	17.7079	P31689	DnaJ homolog subfamily A member 1 OS=Homo sapiens GN=DNAJA1 PE=1 SV=2 - [DNJA1_HUMAN]	12.0968	12.34	5	4	44.8395	B4E1P2	cDNA FLJ59223, highly similar to C-Rel proto-oncogene protein OS=Homo sapiens PE=2 SV=1 - [B4E1P2_HUMAN]	7.24839	6.47	3	3	65.1176	A8MUD9	Ribosomal protein L7 OS=Homo sapiens GN=RPL7 PE=3 SV=1 - [A8MUD9_HUMAN]	12.6254	20.19	3	4	24.4174	Q9BVP2	Guanine nucleotide-binding protein-like 3 OS=Homo sapiens GN=GNL3 PE=1 SV=2 - [GNL3_HUMAN]	11.709	10.02	1	5	61.9545	P07737	Profilin-1 OS=Homo sapiens GN=PFN1 PE=1 SV=2 - [PROF1_HUMAN]	20.9032	42.86	3	5	15.0446	Q04695	Keratin, type I cytoskeletal 17 OS=Homo sapiens GN=KRT17 PE=1 SV=2 - [K1C17_HUMAN]	11.2443	10.42	7	5	48.076	Q71V99
B3KQ59	RuvB-like 2 (E. coli) OS=Homo sapiens GN=RUVBL2 PE=2 SV=1 - [B3KQ59_HUMAN]	9.18793	15.31	3	5	46.277	P04899	Guanine nucleotide-binding protein G(i) subunit alpha-2 OS=Homo sapiens GN=GNAI2 PE=1 SV=3 - [GNAI2_HUMAN]	11.9963	16.62	42	5	40.4251	A8K7D9	cDNA FLJ78270, highly similar to Homo sapiens karyopherin alpha 2 (RAG cohort 1, importin alpha 1)(KPNA2), mRNA OS=Homo sapiens PE=2 SV=1 - [A8K7D9_HUMAN]	7.24267	6.24	5	2	57.7979	P51148	Ras-related protein Rab-5C OS=Homo sapiens GN=RAB5C PE=1 SV=2 - [RAB5C_HUMAN]	12.566	21.3	2	4	23.4678	B4DVI7	cDNA FLJ54176, highly similar to Signal recognition particle 68 kDa protein OS=Homo sapiens PE=2 SV=1 - [B4DVI7_HUMAN]	11.6335	9.51	7	4	60.1894	B4E3I4	cDNA FLJ53432, highly similar to DNA mismatch repair protein MSH6 OS=Homo sapiens PE=2 SV=1 - [B4E3I4_HUMAN]	20.9022	9.83	5	9	119.688	P16152	Carbonyl reductase [NADPH] 1 OS=Homo sapiens GN=CBR1 PE=1 SV=3 - [CBR1_HUMAN]	11.2424	20.22	6	4	30.3559	B0AZP7
F8W1T6	RNA binding motif, single stranded interacting protein 2 OS=Homo sapiens GN=RBMS2 PE=4 SV=1 - [F8W1T6_HUMAN]	9.12466	12.5	2	3	37.1634	Q13501-2	Isoform 2 of Sequestosome-1 OS=Homo sapiens GN=SQSTM1 - [SQSTM_HUMAN]	11.9922	16.01	11	4	38.6045	B3KRE0	cDNA FLJ34086 fis, clone FCBBF3005320, highly similar to Double-stranded RNA-binding protein Staufen homolog 1 OS=Homo sapiens PE=2 SV=1 - [B3KRE0_HUMAN]	7.23146	7.95	7	2	39.9759	B4DNP0	cDNA FLJ59362, highly similar to Signal transducer and activator of transcription 3 OS=Homo sapiens PE=2 SV=1 - [B4DNP0_HUMAN]	12.5554	7.44	7	4	76.1134	Q86TY5	Full-length cDNA clone CS0DI041YE05 of Placenta of Homo sapiens (human) OS=Homo sapiens PE=2 SV=1 - [Q86TY5_HUMAN]	11.6002	41.32	6	4	13.8882	H0Y9V9	60S ribosomal protein L9 (Fragment) OS=Homo sapiens GN=RPL9 PE=4 SV=1 - [H0Y9V9_HUMAN]	20.8675	19.05	6	4	21.5557	P07237	Protein disulfide-isomerase OS=Homo sapiens GN=P4HB PE=1 SV=3 - [PDIA1_HUMAN]	11.2297	12.2	11	5	57.0807	Q8N1N4
Q9H910-2	Isoform 2 of Hematological and neurological expressed 1-like protein OS=Homo sapiens GN=HN1L - [HN1L_HUMAN]	9.11601	24.14	4	3	18.4052	D6R9P3	Heterogeneous nuclear ribonucleoprotein A/B OS=Homo sapiens GN=HNRNPAB PE=4 SV=1 - [D6R9P3_HUMAN]	11.9822	16.07	10	4	30.284	P53621	Coatomer subunit alpha OS=Homo sapiens GN=COPA PE=1 SV=2 - [COPA_HUMAN]	7.20719	2.86	2	3	138.258	B4DX52	Uncharacterized protein OS=Homo sapiens GN=DNAJB1 PE=2 SV=1 - [B4DX52_HUMAN]	12.5104	22.92	3	5	26.999	Q96KK5	Histone H2A type 1-H OS=Homo sapiens GN=HIST1H2AH PE=1 SV=3 - [H2A1H_HUMAN]	11.5896	21.88	11	2	13.8978	G3V4W0	Heterogeneous nuclear ribonucleoproteins C1/C2 (Fragment) OS=Homo sapiens GN=HNRNPC PE=2 SV=1 - [G3V4W0_HUMAN]	20.8483	25.57	29	7	28.8985	B4DY23	cDNA FLJ61188, highly similar to Basigin OS=Homo sapiens PE=2 SV=1 - [B4DY23_HUMAN]	11.2146	18.32	6	3	28.4143	P37802
A8K0T9	cDNA FLJ75422, highly similar to Homo sapiens capping protein (actin filament) muscle Z-line, alpha 1, mRNA OS=Homo sapiens PE=2 SV=1 - [A8K0T9_HUMAN]	9.09875	13.99	2	3	32.8883	Q59GS3	Proteasome 26S ATPase subunit 5 variant (Fragment) OS=Homo sapiens PE=2 SV=1 - [Q59GS3_HUMAN]	11.9767	20.58	4	6	38.7364	F5GX77	tRNA methyltransferase 11-2 homolog (S. cerevisiae) OS=Homo sapiens GN=TRMT112 PE=4 SV=1 - [F5GX77_HUMAN]	7.13525	37.74	3	3	11.9643	P16152	Carbonyl reductase [NADPH] 1 OS=Homo sapiens GN=CBR1 PE=1 SV=3 - [CBR1_HUMAN]	12.4452	14.8	1	3	30.3559	B4DMT5	Eukaryotic translation initiation factor 3 subunit F OS=Homo sapiens GN=EIF3F PE=2 SV=1 - [B4DMT5_HUMAN]	11.5821	14.33	4	3	33.219	B7Z3Y3	cDNA FLJ50557, highly similar to Homo sapiens microtubule-associated protein 7 (MAP7), mRNA OS=Homo sapiens PE=2 SV=1 - [B7Z3Y3_HUMAN]	20.8047	7.79	9	4	66.9277	Q7Z451	AP-2 complex subunit beta OS=Homo sapiens GN=AP2B1 PE=2 SV=1 - [Q7Z451_HUMAN]	11.1548	8.52	15	6	98.0557	D3DN77
F1T0I1	Protein transport protein Sec16A OS=Homo sapiens GN=SEC16A PE=2 SV=1 - [F1T0I1_HUMAN]	9.08589	1.89	1	3	249.328	P06748-2	Isoform 2 of Nucleophosmin OS=Homo sapiens GN=NPM1 - [NPM_HUMAN]	11.9597	13.58	7	3	29.4462	D6RD69	SAR1 homolog B (S. cerevisiae) (Fragment) OS=Homo sapiens GN=SAR1B PE=3 SV=1 - [D6RD69_HUMAN]	7.05918	11.18	3	2	19.0349	Q92900-2	Isoform 2 of Regulator of nonsense transcripts 1 OS=Homo sapiens GN=UPF1 - [RENT1_HUMAN]	12.4411	4.11	2	4	122.958	G3V1B3	60S ribosomal protein L21 OS=Homo sapiens GN=RPL21 PE=4 SV=1 - [G3V1B3_HUMAN]	11.5185	31.03	4	3	9.88007	Q9UBB4	Ataxin-10 OS=Homo sapiens GN=ATXN10 PE=1 SV=1 - [ATX10_HUMAN]	20.6202	15.16	3	6	53.4548	B2RCJ7	cDNA, FLJ96117, highly similar to Homo sapiens calpastatin (CAST), transcript variant 4, mRNA OS=Homo sapiens PE=2 SV=1 - [B2RCJ7_HUMAN]	11.1492	7.29	22	4	63.5386	O60884
G3V2K7	Transmembrane emp24-like trafficking protein 10 (yeast) OS=Homo sapiens GN=TMED10 PE=3 SV=1 - [G3V2K7_HUMAN]	9.01498	15.03	4	2	16.8937	P08754	Guanine nucleotide-binding protein G(k) subunit alpha OS=Homo sapiens GN=GNAI3 PE=1 SV=3 - [GNAI3_HUMAN]	11.9485	16.95	30	5	40.5063	P05387	60S acidic ribosomal protein P2 OS=Homo sapiens GN=RPLP2 PE=1 SV=1 - [RLA2_HUMAN]	7.02764	24.35	1	2	11.6578	Q9Y262	Eukaryotic translation initiation factor 3 subunit L OS=Homo sapiens GN=EIF3L PE=1 SV=1 - [EIF3L_HUMAN]	12.4343	11.35	3	6	66.6844	D6RAF8	Heterogeneous nuclear ribonucleoprotein D0 (Fragment) OS=Homo sapiens GN=HNRNPD PE=2 SV=1 - [D6RAF8_HUMAN]	11.4534	22.62	9	4	23.0622	B4DZC3	5'-3' exoribonuclease 2 OS=Homo sapiens GN=XRN2 PE=2 SV=1 - [B4DZC3_HUMAN]	20.587	8.37	4	6	102.351	P21796	Voltage-dependent anion-selective channel protein 1 OS=Homo sapiens GN=VDAC1 PE=1 SV=2 - [VDAC1_HUMAN]	11.0835	14.84	4	4	30.7536	Q6UWP8
P62280	40S ribosomal protein S11 OS=Homo sapiens GN=RPS11 PE=1 SV=3 - [RS11_HUMAN]	8.942	27.85	1	5	18.419	B7Z4V2	Heat shock 70kDa protein 9 (mortalin) OS=Homo sapiens GN=HSPA9 PE=2 SV=1 - [B7Z4V2_HUMAN]	11.9348	9.62	10	5	72.3561	Q9BTD8-4	Isoform 4 of RNA-binding protein 42 OS=Homo sapiens GN=RBM42 - [RBM42_HUMAN]	7.00629	5.61	4	2	46.9951	E9PJD9	Ribosomal protein L27a OS=Homo sapiens GN=RPL27A PE=3 SV=1 - [E9PJD9_HUMAN]	12.3758	37.36	6	4	10.1206	Q7Z427	Putative MAPK activating protein OS=Homo sapiens PE=2 SV=1 - [Q7Z427_HUMAN]	11.4469	12.29	9	3	38.6797	B4DDF4	Calponin-2 OS=Homo sapiens GN=CNN2 PE=2 SV=1 - [B4DDF4_HUMAN]	20.5426	20.13	12	5	32.5956	J3QLL0	Importin subunit alpha-2 (Fragment) OS=Homo sapiens GN=KPNA2 PE=4 SV=1 - [J3QLL0_HUMAN]	11.068	37.31	6	3	15.2249	P07195
Q9Y266	Nuclear migration protein nudC OS=Homo sapiens GN=NUDC PE=1 SV=1 - [NUDC_HUMAN]	8.92837	13.6	1	4	38.2191	B4DY09	cDNA FLJ51660, highly similar to Interleukin enhancer-binding factor 2 OS=Homo sapiens PE=2 SV=1 - [B4DY09_HUMAN]	11.9113	13.35	4	4	38.8862	P61106	Ras-related protein Rab-14 OS=Homo sapiens GN=RAB14 PE=1 SV=4 - [RAB14_HUMAN]	6.86192	24.19	1	3	23.8819	P13489	Ribonuclease inhibitor OS=Homo sapiens GN=RNH1 PE=1 SV=2 - [RINI_HUMAN]	12.2738	11.5	1	4	49.9411	F8VRJ2	Nucleosome assembly protein 1-like 1 (Fragment) OS=Homo sapiens GN=NAP1L1 PE=2 SV=1 - [F8VRJ2_HUMAN]	11.4356	34.21	21	3	13.4918	E9PPR1	Elongation factor 1-delta (Fragment) OS=Homo sapiens GN=EEF1D PE=2 SV=1 - [E9PPR1_HUMAN]	20.5285	30.72	19	4	18.146	B3KY03	Condensin complex subunit 1 OS=Homo sapiens PE=2 SV=1 - [B3KY03_HUMAN]	11.0358	4.11	7	4	152.763	P09234
A8K7H3	cDNA FLJ77670, highly similar to Homo sapiens ribosomal protein S15a (RPS15A), mRNA OS=Homo sapiens PE=2 SV=1 - [A8K7H3_HUMAN]	8.88813	26.92	2	4	14.8139	G3V576	Uncharacterized protein OS=Homo sapiens GN=HNRNPC PE=4 SV=1 - [G3V576_HUMAN]	11.8196	17.32	34	4	25.2411	Q07960	Rho GTPase-activating protein 1 OS=Homo sapiens GN=ARHGAP1 PE=1 SV=1 - [RHG01_HUMAN]	6.81947	7.29	1	2	50.4042	Q969S3	Zinc finger protein 622 OS=Homo sapiens GN=ZNF622 PE=1 SV=1 - [ZN622_HUMAN]	12.2691	11.32	1	4	54.2374	P18085	ADP-ribosylation factor 4 OS=Homo sapiens GN=ARF4 PE=1 SV=3 - [ARF4_HUMAN]	11.3972	24.44	3	4	20.4977	P06493	Cyclin-dependent kinase 1 OS=Homo sapiens GN=CDK1 PE=1 SV=3 - [CDK1_HUMAN]	20.4955	16.84	4	5	34.0739	B4DLA6	cDNA FLJ54365, highly similar to DNA replication licensing factor MCM4 OS=Homo sapiens PE=2 SV=1 - [B4DLA6_HUMAN]	11.0344	5.1	4	3	92.664	Q3MHD2
P38919	Eukaryotic initiation factor 4A-III OS=Homo sapiens GN=EIF4A3 PE=1 SV=4 - [IF4A3_HUMAN]	8.88671	11.92	1	4	46.8412	Q96TA1-2	Isoform 2 of Niban-like protein 1 OS=Homo sapiens GN=FAM129B - [NIBL1_HUMAN]	11.7999	7.37	5	5	82.6309	P60866	40S ribosomal protein S20 OS=Homo sapiens GN=RPS20 PE=1 SV=1 - [RS20_HUMAN]	6.6835	22.69	4	3	13.3643	B4DJ10	Uncharacterized protein OS=Homo sapiens GN=LARS PE=2 SV=1 - [B4DJ10_HUMAN]	12.2676	6.51	6	6	127.955	Q7Z3K9	Putative uncharacterized protein DKFZp781L0540 (Fragment) OS=Homo sapiens GN=DKFZp781L0540 PE=2 SV=1 - [Q7Z3K9_HUMAN]	11.3728	3.63	3	2	89.9667	P04075	Fructose-bisphosphate aldolase A OS=Homo sapiens GN=ALDOA PE=1 SV=2 - [ALDOA_HUMAN]	20.4407	21.15	9	9	39.3953	E9PMD7	Serine/threonine-protein phosphatase (Fragment) OS=Homo sapiens GN=PPP1CA PE=2 SV=1 - [E9PMD7_HUMAN]	11.0241	22.13	14	5	28.8793	B4DKK3
B3KQV6	cDNA FLJ33169 fis, clone ADRGL2000384, highly similar to Serine/threonine-protein phosphatase 2A 65 kDa regulatory subunit A alpha isoform OS=Homo sapiens PE=2 SV=1 - [B3KQV6_HUMAN]	8.7822	11.46	9	4	45.5748	E5RJ68	Adaptor-related protein complex 3, beta 1 subunit OS=Homo sapiens GN=AP3B1 PE=4 SV=1 - [E5RJ68_HUMAN]	11.788	6.79	13	6	116.122	Q86U70-3	Isoform 2 of LIM domain-binding protein 1 OS=Homo sapiens GN=LDB1 - [LDB1_HUMAN]	6.66847	10.44	3	3	36.4039	P61019	Ras-related protein Rab-2A OS=Homo sapiens GN=RAB2A PE=1 SV=1 - [RAB2A_HUMAN]	12.264	25	1	4	23.5308	P51148	Ras-related protein Rab-5C OS=Homo sapiens GN=RAB5C PE=1 SV=2 - [RAB5C_HUMAN]	11.362	17.59	1	3	23.4678	Q6NVI1	MARCKS protein (Fragment) OS=Homo sapiens GN=MARCKS PE=2 SV=1 - [Q6NVI1_HUMAN]	20.3862	33.12	2	3	14.8501	B3KQH1	cDNA FLJ90452 fis, clone NT2RP3001475, highly similar to Splicing factor 3B subunit 3 OS=Homo sapiens PE=2 SV=1 - [B3KQH1_HUMAN]	10.9971	5.02	4	3	99.8586	E5RGV5
Q59H49	Polypyrimidine tract-binding protein 1 isoform c variant (Fragment) OS=Homo sapiens PE=2 SV=1 - [Q59H49_HUMAN]	8.77203	7.29	4	2	35.5272	P62826	GTP-binding nuclear protein Ran OS=Homo sapiens GN=RAN PE=1 SV=3 - [RAN_HUMAN]	11.771	22.22	8	4	24.4076	Q96HX3	Similar to ribophorin I (Fragment) OS=Homo sapiens PE=2 SV=1 - [Q96HX3_HUMAN]	6.65665	4.23	6	2	64.5417	P62280	40S ribosomal protein S11 OS=Homo sapiens GN=RPS11 PE=1 SV=3 - [RS11_HUMAN]	12.2544	32.91	1	6	18.419	P53396	ATP-citrate synthase OS=Homo sapiens GN=ACLY PE=1 SV=3 - [ACLY_HUMAN]	11.267	5.9	4	5	120.762	Q1KMD3	Heterogeneous nuclear ribonucleoprotein U-like protein 2 OS=Homo sapiens GN=HNRNPUL2 PE=1 SV=1 - [HNRL2_HUMAN]	20.1109	10.84	2	8	85.0522	O76003	Glutaredoxin-3 OS=Homo sapiens GN=GLRX3 PE=1 SV=2 - [GLRX3_HUMAN]	10.9789	18.21	1	5	37.4082	B4E162
Q14934-13	Isoform 13 of Nuclear factor of activated T-cells, cytoplasmic 4 OS=Homo sapiens GN=NFATC4 - [NFAC4_HUMAN]	8.75957	6.5	12	4	88.0476	P07737	Profilin-1 OS=Homo sapiens GN=PFN1 PE=1 SV=2 - [PROF1_HUMAN]	11.7415	27.14	1	3	15.0446	Q86X55-2	Isoform 2 of Histone-arginine methyltransferase CARM1 OS=Homo sapiens GN=CARM1 - [CARM1_HUMAN]	6.64987	8.33	3	3	41.8578	P63173	60S ribosomal protein L38 OS=Homo sapiens GN=RPL38 PE=1 SV=2 - [RL38_HUMAN]	12.2141	50	1	5	8.21273	Q5J908	HCCR-binding protein 2 OS=Homo sapiens PE=2 SV=1 - [Q5J908_HUMAN]	11.2532	41.74	6	4	12.5784	K7EIV0	Calpain small subunit 1 OS=Homo sapiens GN=CAPNS1 PE=4 SV=1 - [K7EIV0_HUMAN]	19.9266	26.94	9	5	21.7986	A8K607	cDNA FLJ76855, highly similar to Homo sapiens exportin 7 (XPO7), mRNA OS=Homo sapiens PE=2 SV=1 - [A8K607_HUMAN]	10.8754	4.14	6	4	123.847	P60953
A6NDY9	Filamin A OS=Homo sapiens GN=FLNA PE=2 SV=4 - [A6NDY9_HUMAN]	8.75102	2.03	6	4	245.713	Q5M7Z9	TARS protein (Fragment) OS=Homo sapiens GN=TARS PE=2 SV=1 - [Q5M7Z9_HUMAN]	11.7281	9.68	15	5	78.5554	Q5J8M4	Migration-inducing gene 14 OS=Homo sapiens PE=2 SV=1 - [Q5J8M4_HUMAN]	6.6244	13.35	4	4	39.4532	P61081	NEDD8-conjugating enzyme Ubc12 OS=Homo sapiens GN=UBE2M PE=1 SV=1 - [UBC12_HUMAN]	12.1661	24.59	1	4	20.8866	Q8IWR8	Ribosomal protein L19 (Fragment) OS=Homo sapiens PE=2 SV=1 - [Q8IWR8_HUMAN]	11.249	15.03	5	2	20.8068	E9PM69	26S protease regulatory subunit 6A OS=Homo sapiens GN=PSMC3 PE=2 SV=1 - [E9PM69_HUMAN]	19.8994	19.65	8	6	44.2958	Q96HX3	Similar to ribophorin I (Fragment) OS=Homo sapiens PE=2 SV=1 - [Q96HX3_HUMAN]	10.8289	10.21	8	5	64.5417	P62266
C9JL12	Prolyl 4-hydroxylase, alpha polypeptide I OS=Homo sapiens GN=P4HA1 PE=4 SV=1 - [C9JL12_HUMAN]	8.73338	8.14	3	3	58.921	Q71UM5	40S ribosomal protein S27-like OS=Homo sapiens GN=RPS27L PE=1 SV=3 - [RS27L_HUMAN]	11.7029	39.29	5	4	9.47087	Q08554-2	Isoform 1B of Desmocollin-1 OS=Homo sapiens GN=DSC1 - [DSC1_HUMAN]	6.62389	3.45	2	2	93.776	Q59GF8	Heat shock 70kDa protein 4 isoform a variant (Fragment) OS=Homo sapiens PE=2 SV=1 - [Q59GF8_HUMAN]	12.1653	8.06	3	5	87.9492	B4DT72	26S proteasome non-ATPase regulatory subunit 3 OS=Homo sapiens GN=PSMD3 PE=2 SV=1 - [B4DT72_HUMAN]	11.1903	14.89	9	4	41.1577	Q08ES8	Cell growth-inhibiting protein 34 OS=Homo sapiens PE=2 SV=1 - [Q08ES8_HUMAN]	19.78	21.47	4	4	20.0816	Q71UM5	40S ribosomal protein S27-like OS=Homo sapiens GN=RPS27L PE=1 SV=3 - [RS27L_HUMAN]	10.811	30.95	4	4	9.47087	B2RDK5
P18621	60S ribosomal protein L17 OS=Homo sapiens GN=RPL17 PE=1 SV=3 - [RL17_HUMAN]	8.70927	26.09	1	4	21.3833	B5MEH6	Zinc finger RNA binding protein OS=Homo sapiens GN=ZFR PE=4 SV=1 - [B5MEH6_HUMAN]	11.6828	4.73	5	3	115.082	B3KRK4	cDNA FLJ34459 fis, clone HLUNG2002916, highly similar to SRC SUBSTRATE CORTACTIN OS=Homo sapiens PE=2 SV=1 - [B3KRK4_HUMAN]	6.61858	14.1	6	2	26.2065	P52594-2	Isoform 2 of Arf-GAP domain and FG repeat-containing protein 1 OS=Homo sapiens GN=AGFG1 - [AGFG1_HUMAN]	12.1643	12.45	6	5	54.1484	A8K8J9	Dynactin 2 (P50), isoform CRA_b OS=Homo sapiens GN=DCTN2 PE=2 SV=1 - [A8K8J9_HUMAN]	11.1838	15.29	10	3	34.4652	Q92783	Signal transducing adapter molecule 1 OS=Homo sapiens GN=STAM PE=1 SV=3 - [STAM1_HUMAN]	19.7458	9.44	3	4	59.142	Q96P70	Importin-9 OS=Homo sapiens GN=IPO9 PE=1 SV=3 - [IPO9_HUMAN]	10.8099	4.13	1	3	115.889	J3QLE5
B4DF70	cDNA FLJ60461, highly similar to Peroxiredoxin-2 (EC 1.11.1.15) OS=Homo sapiens PE=2 SV=1 - [B4DF70_HUMAN]	8.65809	19.67	2	3	20.0946	Q8IX12-2	Isoform 2 of Cell division cycle and apoptosis regulator protein 1 OS=Homo sapiens GN=CCAR1 - [CCAR1_HUMAN]	11.5846	5.9	6	5	130.962	Q96EY5-3	Isoform 3 of Multivesicular body subunit 12A OS=Homo sapiens GN=FAM125A - [F125A_HUMAN]	6.61382	12.84	4	2	27.0329	P84085	ADP-ribosylation factor 5 OS=Homo sapiens GN=ARF5 PE=1 SV=2 - [ARF5_HUMAN]	12.1477	21.67	2	4	20.5166	Q86TL9	DnaJ (Hsp40) homolog, subfamily A, member 1, isoform CRA_b OS=Homo sapiens GN=DNAJA1 PE=2 SV=1 - [Q86TL9_HUMAN]	11.173	14.2	4	4	37.0208	Q7Z427	Putative MAPK activating protein OS=Homo sapiens PE=2 SV=1 - [Q7Z427_HUMAN]	19.7309	12.29	9	3	38.6797	B0UZ99	HLA-B associated transcript 1 (Fragment) OS=Homo sapiens GN=BAT1 PE=2 SV=1 - [B0UZ99_HUMAN]	10.6703	15.57	11	4	32.9197	Q13151
O14929-2	Isoform B of Histone acetyltransferase type B catalytic subunit OS=Homo sapiens GN=HAT1 - [HAT1_HUMAN]	8.65529	11.68	2	3	39.7609	B4DW94	RAP1B, member of RAS oncogene family OS=Homo sapiens GN=RAP1B PE=2 SV=1 - [B4DW94_HUMAN]	11.5558	30.66	26	4	15.3459	E5RI99	Ribosomal protein L30 (Fragment) OS=Homo sapiens GN=RPL30 PE=3 SV=1 - [E5RI99_HUMAN]	6.59852	24.56	2	2	12.6476	Q9BWF4	MCM2 protein (Fragment) OS=Homo sapiens GN=MCM2 PE=2 SV=2 - [Q9BWF4_HUMAN]	12.1167	14.64	7	4	41.238	F8VWC5	60S ribosomal protein L18 OS=Homo sapiens GN=RPL18 PE=2 SV=1 - [F8VWC5_HUMAN]	11.1558	30.19	9	4	18.08	P13489	Ribonuclease inhibitor OS=Homo sapiens GN=RNH1 PE=1 SV=2 - [RINI_HUMAN]	19.6492	11.93	5	4	49.9411	Q86TY5	Full-length cDNA clone CS0DI041YE05 of Placenta of Homo sapiens (human) OS=Homo sapiens PE=2 SV=1 - [Q86TY5_HUMAN]	10.5907	41.32	6	4	13.8882	B7Z475
P17812	CTP synthase 1 OS=Homo sapiens GN=CTPS PE=1 SV=2 - [PYRG1_HUMAN]	8.65264	8.12	1	5	66.648	Q13263-2	Isoform 2 of Transcription intermediary factor 1-beta OS=Homo sapiens GN=TRIM28 - [TIF1B_HUMAN]	11.5257	9.69	3	5	79.4235	F8W7C6	Ribosomal protein L10 OS=Homo sapiens GN=RPL10 PE=4 SV=1 - [F8W7C6_HUMAN]	6.57907	14.72	4	2	18.5797	B4DSD8	Phosphorylase OS=Homo sapiens PE=2 SV=1 - [B4DSD8_HUMAN]	12.0947	6.65	3	4	85.7328	Q9Y6G9	Cytoplasmic dynein 1 light intermediate chain 1 OS=Homo sapiens GN=DYNC1LI1 PE=1 SV=3 - [DC1L1_HUMAN]	11.1322	12.43	5	5	56.544	Q5VU21	PAI-1 mRNA-binding protein variant OS=Homo sapiens PE=2 SV=1 - [Q5VU21_HUMAN]	19.6247	17.83	5	5	42.4013	E9PN91	Elongation factor 1-delta OS=Homo sapiens GN=EEF1D PE=2 SV=1 - [E9PN91_HUMAN]	10.5867	35.85	17	3	11.6088	P13667
B4DIV6	cDNA FLJ61280, highly similar to Eyes absent homolog 4 (EC 3.1.3.48) OS=Homo sapiens PE=2 SV=1 - [B4DIV6_HUMAN]	8.61755	5.26	10	2	61.8558	G3XAL7	Putative uncharacterized protein LOC133619 OS=Homo sapiens GN=PRRC1 PE=4 SV=1 - [G3XAL7_HUMAN]	11.4424	6.97	6	2	46.4576	P62269	40S ribosomal protein S18 OS=Homo sapiens GN=RPS18 PE=1 SV=3 - [RS18_HUMAN]	6.54675	21.05	1	4	17.7079	Q2Q9H2	Glucose-6-phosphate 1-dehydrogenase (Fragment) OS=Homo sapiens GN=G6PD PE=2 SV=1 - [Q2Q9H2_HUMAN]	12.0939	13.47	8	5	54.7898	P17987	T-complex protein 1 subunit alpha OS=Homo sapiens GN=TCP1 PE=1 SV=1 - [TCPA_HUMAN]	11.1314	9.89	5	5	60.3056	Q6P1R0	EIF3A protein (Fragment) OS=Homo sapiens GN=EIF3A PE=2 SV=1 - [Q6P1R0_HUMAN]	19.5693	8.81	9	5	74.8612	F8W1N5	Nascent polypeptide-associated complex subunit alpha (Fragment) OS=Homo sapiens GN=NACA PE=2 SV=1 - [F8W1N5_HUMAN]	10.5818	40.85	8	2	7.80827	B4DJ10
P53618	Coatomer subunit beta OS=Homo sapiens GN=COPB1 PE=1 SV=3 - [COPB_HUMAN]	8.61616	4.41	1	3	107.074	B3KTM6	Ribosomal protein L5, isoform CRA_b OS=Homo sapiens GN=RPL5 PE=2 SV=1 - [B3KTM6_HUMAN]	11.3687	17.81	4	3	28.0262	F8W1T6	RNA binding motif, single stranded interacting protein 2 OS=Homo sapiens GN=RBMS2 PE=4 SV=1 - [F8W1T6_HUMAN]	6.50455	8.72	2	2	37.1634	Q86TL9	DnaJ (Hsp40) homolog, subfamily A, member 1, isoform CRA_b OS=Homo sapiens GN=DNAJA1 PE=2 SV=1 - [Q86TL9_HUMAN]	12.0134	14.2	2	4	37.0208	Q9BQQ5	Ribosomal protein L27a OS=Homo sapiens GN=L27a PE=2 SV=1 - [Q9BQQ5_HUMAN]	11.1205	43.4	5	4	12.0074	O60763	General vesicular transport factor p115 OS=Homo sapiens GN=USO1 PE=1 SV=2 - [USO1_HUMAN]	19.2547	8.21	5	8	107.828	P49411	Elongation factor Tu, mitochondrial OS=Homo sapiens GN=TUFM PE=1 SV=2 - [EFTU_HUMAN]	10.5793	9.96	1	3	49.5102	P55735
Q5JR07	Ras homolog gene family, member C (Fragment) OS=Homo sapiens GN=RHOC PE=2 SV=1 - [Q5JR07_HUMAN]	8.59224	20.47	10	3	14.3753	P18621	60S ribosomal protein L17 OS=Homo sapiens GN=RPL17 PE=1 SV=3 - [RL17_HUMAN]	11.3446	21.74	5	3	21.3833	P49755	Transmembrane emp24 domain-containing protein 10 OS=Homo sapiens GN=TMED10 PE=1 SV=2 - [TMEDA_HUMAN]	6.49797	12.79	2	2	24.96	B4DJ66	Proteasome (Prosome, macropain) 26S subunit, non-ATPase, 13, isoform CRA_d OS=Homo sapiens GN=PSMD13 PE=2 SV=1 - [B4DJ66_HUMAN]	11.9608	14.79	6	4	35.3244	H7C2W9	60S ribosomal protein L31 (Fragment) OS=Homo sapiens GN=RPL31 PE=4 SV=1 - [H7C2W9_HUMAN]	11.079	28.7	7	3	12.8031	B4DV79	Eukaryotic translation initiation factor 3 subunit B OS=Homo sapiens GN=EIF3B PE=2 SV=1 - [B4DV79_HUMAN]	19.2333	9.35	8	6	85.0814	H3BQN4	Fructose-bisphosphate aldolase OS=Homo sapiens GN=ALDOA PE=2 SV=1 - [H3BQN4_HUMAN]	10.5581	17.45	10	7	39.3154	B4DWN1
Q13347	Eukaryotic translation initiation factor 3 subunit I OS=Homo sapiens GN=EIF3I PE=1 SV=1 - [EIF3I_HUMAN]	8.57515	12	2	3	36.4786	Q9UBV8	Peflin OS=Homo sapiens GN=PEF1 PE=1 SV=1 - [PEF1_HUMAN]	11.3357	16.2	1	4	30.3613	A6NKT1	Uncharacterized protein OS=Homo sapiens GN=RPN2 PE=4 SV=1 - [A6NKT1_HUMAN]	6.4949	5.14	4	2	56.3254	B7Z5W0	cDNA FLJ53174, highly similar to Numb-like protein OS=Homo sapiens PE=2 SV=1 - [B7Z5W0_HUMAN]	11.9345	9.89	3	4	60.5187	B0V043	Valine--tRNA ligase OS=Homo sapiens GN=VARS PE=3 SV=1 - [B0V043_HUMAN]	11.0673	4.43	2	4	140.377	P45974	Ubiquitin carboxyl-terminal hydrolase 5 OS=Homo sapiens GN=USP5 PE=1 SV=2 - [UBP5_HUMAN]	19.1854	7.11	1	5	95.7253	Q6PIX2	SFPQ protein (Fragment) OS=Homo sapiens GN=SFPQ PE=2 SV=1 - [Q6PIX2_HUMAN]	10.5209	10.1	4	4	55.4353	B2R774
E7EM57	Glucose-6-phosphate 1-dehydrogenase (Fragment) OS=Homo sapiens GN=G6PD PE=3 SV=1 - [E7EM57_HUMAN]	8.52254	16.25	10	4	36.5194	Q15459	Splicing factor 3A subunit 1 OS=Homo sapiens GN=SF3A1 PE=1 SV=1 - [SF3A1_HUMAN]	11.3246	6.18	4	4	88.8305	B4DS24	cDNA FLJ50635, highly similar to ATP-dependent RNA helicase DDX19A (EC 3.6.1.-) OS=Homo sapiens PE=2 SV=1 - [B4DS24_HUMAN]	6.47545	5.59	10	2	50.402	P13010	X-ray repair cross-complementing protein 5 OS=Homo sapiens GN=XRCC5 PE=1 SV=3 - [XRCC5_HUMAN]	11.9202	7.1	1	5	82.6523	Q6NUR1	Non-SMC condensin I complex, subunit G OS=Homo sapiens GN=NCAPG PE=2 SV=1 - [Q6NUR1_HUMAN]	11.0411	4.93	2	4	114.122	P61106	Ras-related protein Rab-14 OS=Homo sapiens GN=RAB14 PE=1 SV=4 - [RAB14_HUMAN]	19.1283	23.26	1	5	23.8819	P61313	60S ribosomal protein L15 OS=Homo sapiens GN=RPL15 PE=1 SV=2 - [RL15_HUMAN]	10.4405	21.57	6	4	24.1311	P38919
P61106	Ras-related protein Rab-14 OS=Homo sapiens GN=RAB14 PE=1 SV=4 - [RAB14_HUMAN]	8.51093	18.14	1	3	23.8819	G8JL97	Dynamin 1-like OS=Homo sapiens GN=DNM1L PE=4 SV=1 - [G8JL97_HUMAN]	11.2872	10.09	21	5	64.137	Q5J908	HCCR-binding protein 2 OS=Homo sapiens PE=2 SV=1 - [Q5J908_HUMAN]	6.46308	22.61	9	2	12.5784	P62244	40S ribosomal protein S15a OS=Homo sapiens GN=RPS15A PE=1 SV=2 - [RS15A_HUMAN]	11.9033	30.77	1	4	14.83	Q9Y5K5	Ubiquitin carboxyl-terminal hydrolase isozyme L5 OS=Homo sapiens GN=UCHL5 PE=1 SV=3 - [UCHL5_HUMAN]	11.0398	18.54	6	5	37.583	B4DZF6	cDNA FLJ54206, highly similar to Ubiquilin-4 OS=Homo sapiens PE=2 SV=1 - [B4DZF6_HUMAN]	19.1211	8.43	6	4	62.1456	C9J3L8	Translocon-associated protein subunit alpha OS=Homo sapiens GN=SSR1 PE=2 SV=1 - [C9J3L8_HUMAN]	10.3993	12.83	7	3	29.5548	B2RBI2
Q86U70-3	Isoform 2 of LIM domain-binding protein 1 OS=Homo sapiens GN=LDB1 - [LDB1_HUMAN]	8.50069	12.34	3	3	36.4039	O60884	DnaJ homolog subfamily A member 2 OS=Homo sapiens GN=DNAJA2 PE=1 SV=1 - [DNJA2_HUMAN]	11.2764	14.56	1	5	45.7166	Q8WWY3-2	Isoform 2 of U4/U6 small nuclear ribonucleoprotein Prp31 OS=Homo sapiens GN=PRPF31 - [PRP31_HUMAN]	6.39864	7.14	5	2	40.7537	Q5J8M4	Migration-inducing gene 14 OS=Homo sapiens PE=2 SV=1 - [Q5J8M4_HUMAN]	11.8934	17.61	3	5	39.4532	F5GY37	Prohibitin-2 OS=Homo sapiens GN=PHB2 PE=2 SV=1 - [F5GY37_HUMAN]	11.0178	14.61	5	3	29.705	P61081	NEDD8-conjugating enzyme Ubc12 OS=Homo sapiens GN=UBE2M PE=1 SV=1 - [UBC12_HUMAN]	19.0677	20.77	2	4	20.8866	O75340	Programmed cell death protein 6 OS=Homo sapiens GN=PDCD6 PE=1 SV=1 - [PDCD6_HUMAN]	10.3909	15.18	2	3	21.8548	B4DSM6
Q8NF64-3	Isoform 3 of Zinc finger MIZ domain-containing protein 2 OS=Homo sapiens GN=ZMIZ2 - [ZMIZ2_HUMAN]	8.43132	4.29	6	4	91.0542	F8VXB1	Coatomer protein complex, subunit zeta 1 (Fragment) OS=Homo sapiens GN=COPZ1 PE=4 SV=1 - [F8VXB1_HUMAN]	11.2704	28.26	12	2	10.6214	B4DLN6	cDNA FLJ59033, highly similar to Protein disulfide-isomerase (EC 5.3.4.1) OS=Homo sapiens PE=2 SV=1 - [B4DLN6_HUMAN]	6.35616	7.98	6	3	51.1556	Q27J81-2	Isoform 2 of Inverted formin-2 OS=Homo sapiens GN=INF2 - [INF2_HUMAN]	11.7799	3.15	2	3	134.533	O75821	Eukaryotic translation initiation factor 3 subunit G OS=Homo sapiens GN=EIF3G PE=1 SV=2 - [EIF3G_HUMAN]	10.9463	14.06	6	4	35.5889	B3KQG6	cDNA FLJ90427 fis, clone NT2RP3000481, highly similar to Importin-7 OS=Homo sapiens PE=2 SV=1 - [B3KQG6_HUMAN]	18.9199	6.51	3	4	82.4626	P46778	60S ribosomal protein L21 OS=Homo sapiens GN=RPL21 PE=1 SV=2 - [RL21_HUMAN]	10.3868	26.88	4	4	18.5531	F2ZC06
B4DWQ5	cDNA FLJ51655, highly similar to Actin-like protein 2 OS=Homo sapiens PE=2 SV=1 - [B4DWQ5_HUMAN]	8.34204	8.52	7	2	34.4859	B4DYC6	cDNA FLJ60958, highly similar to Homo sapiens SGT1, suppressor of G2 allele of SKP1 (SUGT1), mRNA OS=Homo sapiens PE=2 SV=1 - [B4DYC6_HUMAN]	11.2617	14.08	6	3	31.669	Q2TNB3	Cell migration-inducing protein 22 OS=Homo sapiens PE=2 SV=1 - [Q2TNB3_HUMAN]	6.3458	18.83	5	3	27.3313	E9PBV3	Suprabasin OS=Homo sapiens GN=SBSN PE=4 SV=1 - [E9PBV3_HUMAN]	11.7751	18.31	1	3	60.5046	A8K7T0	Kynureninase OS=Homo sapiens GN=KYNU PE=2 SV=1 - [A8K7T0_HUMAN]	10.9102	9.03	5	3	52.3352	P55735	Protein SEC13 homolog OS=Homo sapiens GN=SEC13 PE=1 SV=3 - [SEC13_HUMAN]	18.894	16.77	5	4	35.5181	E9PKG1	Protein arginine N-methyltransferase 1 OS=Homo sapiens GN=PRMT1 PE=2 SV=1 - [E9PKG1_HUMAN]	10.3864	13.85	7	3	37.6848	A1JUI8
E9PAU2	Ribonucleoprotein, PTB-binding 1 OS=Homo sapiens GN=RAVER1 PE=4 SV=1 - [E9PAU2_HUMAN]	8.32318	6.08	1	3	79.5292	Q0IIN1	Keratin 77 OS=Homo sapiens GN=KRT77 PE=2 SV=1 - [Q0IIN1_HUMAN]	11.2177	5.36	7	3	61.7644	B4DZM8	Uncharacterized protein OS=Homo sapiens GN=PSMD5 PE=2 SV=1 - [B4DZM8_HUMAN]	6.33548	8.46	3	3	51.2798	Q99567	Nuclear pore complex protein Nup88 OS=Homo sapiens GN=NUP88 PE=1 SV=2 - [NUP88_HUMAN]	11.7042	4.72	1	4	83.4888	Q13347	Eukaryotic translation initiation factor 3 subunit I OS=Homo sapiens GN=EIF3I PE=1 SV=1 - [EIF3I_HUMAN]	10.8576	13.23	2	4	36.4786	B0V043	Valine--tRNA ligase OS=Homo sapiens GN=VARS PE=3 SV=1 - [B0V043_HUMAN]	18.8815	5.38	5	5	140.377	Q9UBV8	Peflin OS=Homo sapiens GN=PEF1 PE=1 SV=1 - [PEF1_HUMAN]	10.3807	14.79	1	4	30.3613	Q92615
B5BTZ6	Signal transducer and activator of transcription 3 isoform 2 OS=Homo sapiens GN=STAT3 PE=2 SV=1 - [B5BTZ6_HUMAN]	8.31923	5.72	3	3	87.9433	P60866	40S ribosomal protein S20 OS=Homo sapiens GN=RPS20 PE=1 SV=1 - [RS20_HUMAN]	11.2116	25.21	5	3	13.3643	Q59GV2	RNA binding motif protein 14 variant (Fragment) OS=Homo sapiens PE=2 SV=1 - [Q59GV2_HUMAN]	6.32965	4.89	2	2	55.596	O15260-2	Isoform 2 of Surfeit locus protein 4 OS=Homo sapiens GN=SURF4 - [SURF4_HUMAN]	11.675	23.9	6	3	17.9581	B5BU24	14-3-3 protein beta/alpha OS=Homo sapiens GN=YWHAB PE=2 SV=1 - [B5BU24_HUMAN]	10.7908	19.11	2	4	28.0948	P15924	Desmoplakin OS=Homo sapiens GN=DSP PE=1 SV=3 - [DESP_HUMAN]	18.6112	3.9	6	12	331.569	Q01650	Large neutral amino acids transporter small subunit 1 OS=Homo sapiens GN=SLC7A5 PE=1 SV=2 - [LAT1_HUMAN]	10.3744	8.48	3	3	54.9743	Q53F37
Q5T749	Keratinocyte proline-rich protein OS=Homo sapiens GN=KPRP PE=1 SV=1 - [KPRP_HUMAN]	8.31713	5.35	1	3	64.0932	Q5U7I5	Transthyretin OS=Pan troglodytes GN=TTR PE=2 SV=1 - [TTHY_PANTR]	11.1966	9.52	1	2	15.8621	Q9NP72	Ras-related protein Rab-18 OS=Homo sapiens GN=RAB18 PE=1 SV=1 - [RAB18_HUMAN]	6.31923	12.62	1	2	22.9626	E5RJ68	Adaptor-related protein complex 3, beta 1 subunit OS=Homo sapiens GN=AP3B1 PE=4 SV=1 - [E5RJ68_HUMAN]	11.6693	6.7	3	6	116.122	Q704T5	MHC class I antigen (Fragment) OS=Homo sapiens GN=HLA-A PE=3 SV=1 - [Q704T5_HUMAN]	10.7888	13.76	33	3	34.2506	E7EMM2	AP-3 complex subunit delta-1 OS=Homo sapiens GN=AP3D1 PE=2 SV=1 - [E7EMM2_HUMAN]	18.5238	7.62	5	6	111.182	H3BN98	Uncharacterized protein (Fragment) OS=Homo sapiens PE=4 SV=2 - [H3BN98_HUMAN]	10.2982	12.66	2	3	27.1504	B3KN05
B4DSL3	cDNA FLJ59412 OS=Homo sapiens PE=2 SV=1 - [B4DSL3_HUMAN]	8.29087	5.6	6	3	76.4852	Q06210-2	Isoform 2 of Glucosamine--fructose-6-phosphate aminotransferase [isomerizing] 1 OS=Homo sapiens GN=GFPT1 - [GFPT1_HUMAN]	11.1924	6.9	7	4	76.7103	Q9BSV4	SFPQ protein (Fragment) OS=Homo sapiens GN=SFPQ PE=2 SV=2 - [Q9BSV4_HUMAN]	6.2946	4.26	4	2	68.5879	Q9H0D6-2	Isoform 2 of 5'-3' exoribonuclease 2 OS=Homo sapiens GN=XRN2 - [XRN2_HUMAN]	11.6605	7.44	4	5	99.8981	D3DN77	HCG2022736, isoform CRA_a OS=Homo sapiens GN=hCG_2022736 PE=2 SV=1 - [D3DN77_HUMAN]	10.7845	20.52	6	6	30.749	Q6UWP8	Suprabasin OS=Homo sapiens GN=SBSN PE=2 SV=2 - [SBSN_HUMAN]	18.4601	18.31	1	3	60.5046	P31949	Protein S100-A11 OS=Homo sapiens GN=S100A11 PE=1 SV=2 - [S10AB_HUMAN]	10.2752	34.29	2	3	11.7328	F5GXN4
Q59GF8	Heat shock 70kDa protein 4 isoform a variant (Fragment) OS=Homo sapiens PE=2 SV=1 - [Q59GF8_HUMAN]	8.24322	4.09	3	2	87.9492	A0PJ62	RPL14 protein (Fragment) OS=Homo sapiens GN=RPL14 PE=2 SV=1 - [A0PJ62_HUMAN]	11.1715	36.29	6	4	14.6019	Q9BWW4-2	Isoform 2 of Single-stranded DNA-binding protein 3 OS=Homo sapiens GN=SSBP3 - [SSBP3_HUMAN]	6.27685	7.48	3	2	37.6727	Q8WX93-4	Isoform 4 of Palladin OS=Homo sapiens GN=PALLD - [PALLD_HUMAN]	11.6095	6.7	5	4	73.2757	Q06210	Glutamine--fructose-6-phosphate aminotransferase [isomerizing] 1 OS=Homo sapiens GN=GFPT1 PE=1 SV=3 - [GFPT1_HUMAN]	10.778	7.15	1	4	78.7563	P31350	Ribonucleoside-diphosphate reductase subunit M2 OS=Homo sapiens GN=RRM2 PE=1 SV=1 - [RIR2_HUMAN]	18.3531	17.48	5	5	44.8488	O00425	Insulin-like growth factor 2 mRNA-binding protein 3 OS=Homo sapiens GN=IGF2BP3 PE=1 SV=2 - [IF2B3_HUMAN]	10.2737	10.36	1	4	63.6656	E9M4D4
B4DT13	cDNA FLJ51542, highly similar to Ras-related protein Rab-11B OS=Homo sapiens PE=2 SV=1 - [B4DT13_HUMAN]	8.23988	21.94	9	3	17.6481	B5LY69	Uridine monophosphate synthetase isoform G OS=Homo sapiens GN=UMPS PE=2 SV=1 - [B5LY69_HUMAN]	11.0198	12.03	11	4	40.2292	P23284	Peptidyl-prolyl cis-trans isomerase B OS=Homo sapiens GN=PPIB PE=1 SV=2 - [PPIB_HUMAN]	6.27326	14.35	1	3	23.7275	B4E162	cDNA FLJ56281, highly similar to 6-phosphofructokinase, muscle type (EC 2.7.1.11) OS=Homo sapiens PE=2 SV=1 - [B4E162_HUMAN]	11.6021	5.6	5	3	66.7412	E7EWI9	Heterogeneous nuclear ribonucleoprotein A3 OS=Homo sapiens GN=HNRNPA3 PE=2 SV=1 - [E7EWI9_HUMAN]	10.7297	19.57	4	4	34.081	H0YE29	Rho GTPase-activating protein 1 (Fragment) OS=Homo sapiens GN=ARHGAP1 PE=4 SV=1 - [H0YE29_HUMAN]	18.3148	15.57	5	5	38.3621	P38919	Eukaryotic initiation factor 4A-III OS=Homo sapiens GN=EIF4A3 PE=1 SV=4 - [IF4A3_HUMAN]	10.2729	8.52	3	3	46.8412	H7C3T4
B4E1P2	cDNA FLJ59223, highly similar to C-Rel proto-oncogene protein OS=Homo sapiens PE=2 SV=1 - [B4E1P2_HUMAN]	8.20195	6.81	3	3	65.1176	H0YHC3	Nucleosome assembly protein 1-like 1 (Fragment) OS=Homo sapiens GN=NAP1L1 PE=4 SV=1 - [H0YHC3_HUMAN]	10.9621	25.76	21	5	23.4028	O76003	Glutaredoxin-3 OS=Homo sapiens GN=GLRX3 PE=1 SV=2 - [GLRX3_HUMAN]	6.26942	8.06	1	2	37.4082	G8JL97	Dynamin 1-like OS=Homo sapiens GN=DNM1L PE=4 SV=1 - [G8JL97_HUMAN]	11.5618	8.17	15	4	64.137	F8W8I6	Nucleolysin TIA-1 isoform p40 OS=Homo sapiens GN=TIA1 PE=2 SV=1 - [F8W8I6_HUMAN]	10.6968	11.95	8	4	42.8075	F8VUA6	60S ribosomal protein L18 (Fragment) OS=Homo sapiens GN=RPL18 PE=2 SV=1 - [F8VUA6_HUMAN]	18.2704	39.23	8	4	14.5201	P62879	Guanine nucleotide-binding protein G(I)/G(S)/G(T) subunit beta-2 OS=Homo sapiens GN=GNB2 PE=1 SV=3 - [GBB2_HUMAN]	10.229	12.06	5	3	37.3071	B4DTA2
B2RDX5	cDNA, FLJ96812, highly similar to Homo sapiens threonyl-tRNA synthetase (TARS), mRNA OS=Homo sapiens PE=2 SV=1 - [B2RDX5_HUMAN]	8.13756	5.49	4	3	82.0612	B4DZI8	Coatomer protein complex, subunit beta 2 (Beta prime), isoform CRA_b OS=Homo sapiens GN=COPB2 PE=2 SV=1 - [B4DZI8_HUMAN]	10.9588	7.64	8	6	98.9836	Q5LJ98	TROVE domain family, member 2 OS=Homo sapiens GN=TROVE2 PE=2 SV=1 - [Q5LJ98_HUMAN]	6.2521	4.63	6	2	58.4452	C9JLS9	Proteasome (prosome, macropain) 26S subunit, ATPase, 2 (Fragment) OS=Homo sapiens GN=PSMC2 PE=4 SV=1 - [C9JLS9_HUMAN]	11.5151	40.77	2	4	14.6276	Q96I24	Far upstream element-binding protein 3 OS=Homo sapiens GN=FUBP3 PE=1 SV=2 - [FUBP3_HUMAN]	10.6331	7.34	1	4	61.6022	B3KVJ5	cDNA FLJ16648 fis, clone TESTI4035508, highly similar to Structural maintenance of chromosomes 4-like 1 protein OS=Homo sapiens PE=2 SV=1 - [B3KVJ5_HUMAN]	18.1928	6.46	4	5	101.012	Q92973	Transportin-1 OS=Homo sapiens GN=TNPO1 PE=1 SV=2 - [TNPO1_HUMAN]	10.198	5.35	1	5	102.289	P08758
P61964	WD repeat-containing protein 5 OS=Homo sapiens GN=WDR5 PE=1 SV=1 - [WDR5_HUMAN]	8.12013	13.47	1	3	36.5655	G3V198	Nucleoporin 160kDa, isoform CRA_e OS=Homo sapiens GN=NUP160 PE=4 SV=1 - [G3V198_HUMAN]	10.9538	3.56	4	4	140.198	B4DQF1	cDNA FLJ55810, highly similar to Golgi reassembly-stacking protein 2 OS=Homo sapiens PE=2 SV=1 - [B4DQF1_HUMAN]	6.23644	9.03	6	2	31.7743	O95817	BAG family molecular chaperone regulator 3 OS=Homo sapiens GN=BAG3 PE=1 SV=3 - [BAG3_HUMAN]	11.4626	8.7	2	4	61.5569	F5H018	GTP-binding nuclear protein Ran (Fragment) OS=Homo sapiens GN=RAN PE=2 SV=1 - [F5H018_HUMAN]	10.5866	21.11	6	4	22.5207	B4DNL5	cDNA FLJ59361, highly similar to Protein disulfide-isomerase (EC 5.3.4.1) OS=Homo sapiens PE=2 SV=1 - [B4DNL5_HUMAN]	18.0948	11.79	14	5	55.3466	F8WJN3	Cleavage and polyadenylation-specificity factor subunit 6 OS=Homo sapiens GN=CPSF6 PE=2 SV=1 - [F8WJN3_HUMAN]	10.1838	9.41	3	3	52.2378	B4DWQ5
P20618	Proteasome subunit beta type-1 OS=Homo sapiens GN=PSMB1 PE=1 SV=2 - [PSB1_HUMAN]	8.1185	12.86	2	2	26.4724	A6NKT1	Uncharacterized protein OS=Homo sapiens GN=RPN2 PE=4 SV=1 - [A6NKT1_HUMAN]	10.9525	7.71	11	3	56.3254	P63173	60S ribosomal protein L38 OS=Homo sapiens GN=RPL38 PE=1 SV=2 - [RL38_HUMAN]	6.22422	34.29	1	2	8.21273	Q08211	ATP-dependent RNA helicase A OS=Homo sapiens GN=DHX9 PE=1 SV=4 - [DHX9_HUMAN]	11.4437	5.75	1	6	140.869	E9PNW4	CD59 glycoprotein OS=Homo sapiens GN=CD59 PE=2 SV=1 - [E9PNW4_HUMAN]	10.5525	22.22	3	2	11.9765	Q96I60	6-phosphofructokinase (Fragment) OS=Homo sapiens GN=PFKM PE=2 SV=2 - [Q96I60_HUMAN]	18.0552	10.58	6	6	81.4914	B3KM36	cDNA FLJ10153 fis, clone HEMBA1003417, highly similar to BAG family molecular chaperone regulator 2 OS=Homo sapiens PE=2 SV=1 - [B3KM36_HUMAN]	10.181	20.85	4	4	23.6972	B4DYD8
E4W6B6	RPL27/NME2 fusion protein (Fragment) OS=Homo sapiens GN=RPL27 PE=2 SV=1 - [E4W6B6_HUMAN]	8.09078	22.22	3	3	14.248	P61006	Ras-related protein Rab-8A OS=Homo sapiens GN=RAB8A PE=1 SV=1 - [RAB8A_HUMAN]	10.9208	21.26	72	4	23.6532	A8K7W3	cDNA FLJ75780, highly similar to Homo sapiens SGT1, suppressor of G2 allele of SKP1 (SUGT1), mRNA OS=Homo sapiens PE=2 SV=1 - [A8K7W3_HUMAN]	6.20344	11.71	4	3	37.8099	B4DDD7	Uncharacterized protein OS=Homo sapiens GN=PDHB PE=2 SV=1 - [B4DDD7_HUMAN]	11.4286	17.01	3	5	37.4901	P01889	HLA class I histocompatibility antigen, B-7 alpha chain OS=Homo sapiens GN=HLA-B PE=1 SV=3 - [1B07_HUMAN]	10.3831	11.33	46	3	40.435	Q6FIG4	RAB1B protein OS=Homo sapiens GN=RAB1B PE=2 SV=1 - [Q6FIG4_HUMAN]	17.9952	26.37	4	5	22.1842	B4DFA2	Vesicle-fusing ATPase OS=Homo sapiens GN=NSF PE=2 SV=1 - [B4DFA2_HUMAN]	10.171	7.3	10	4	71.5386	E9PN91
Q8MJ37	Ran (Fragment) OS=Sus scrofa PE=2 SV=1 - [Q8MJ37_PIG]	7.95829	33.01	4	3	12.0522	F8WDL0	Adaptor-related protein complex 1, beta 1 subunit OS=Homo sapiens GN=AP1B1 PE=4 SV=1 - [F8WDL0_HUMAN]	10.9129	5.01	10	4	101.283	B7Z254	Protein disulfide isomerase family A, member 6 OS=Homo sapiens GN=PDIA6 PE=2 SV=1 - [B7Z254_HUMAN]	6.15851	7.09	7	2	47.8081	B4DW05	Uncharacterized protein OS=Homo sapiens GN=PHB2 PE=2 SV=1 - [B4DW05_HUMAN]	11.3552	17.84	4	3	23.6876	Q96AG4	Leucine-rich repeat-containing protein 59 OS=Homo sapiens GN=LRRC59 PE=1 SV=1 - [LRC59_HUMAN]	10.3562	21.17	1	5	34.9089	Q9Y570	Protein phosphatase methylesterase 1 OS=Homo sapiens GN=PPME1 PE=1 SV=3 - [PPME1_HUMAN]	17.9479	13.73	2	5	42.2882	O60701	UDP-glucose 6-dehydrogenase OS=Homo sapiens GN=UGDH PE=1 SV=1 - [UGDH_HUMAN]	10.1533	10.53	2	4	54.9893	Q5IRN4
Q9UHX1-4	Isoform 4 of Poly(U)-binding-splicing factor PUF60 OS=Homo sapiens GN=PUF60 - [PUF60_HUMAN]	7.91618	7.41	6	3	53.9907	P60953	Cell division control protein 42 homolog OS=Homo sapiens GN=CDC42 PE=1 SV=2 - [CDC42_HUMAN]	10.8755	20.94	8	3	21.245	Q92900-2	Isoform 2 of Regulator of nonsense transcripts 1 OS=Homo sapiens GN=UPF1 - [RENT1_HUMAN]	6.1402	2.86	2	3	122.958	F8W1R7	Myosin, light chain 6, alkali, smooth muscle and non-muscle OS=Homo sapiens GN=MYL6 PE=4 SV=1 - [F8W1R7_HUMAN]	11.3491	31.72	6	4	16.2798	O76003	Glutaredoxin-3 OS=Homo sapiens GN=GLRX3 PE=1 SV=2 - [GLRX3_HUMAN]	10.3451	18.21	1	5	37.4082	Q9BQQ5	Ribosomal protein L27a OS=Homo sapiens GN=L27a PE=2 SV=1 - [Q9BQQ5_HUMAN]	17.9469	38.68	5	4	12.0074	Q14247	Src substrate cortactin OS=Homo sapiens GN=CTTN PE=1 SV=2 - [SRC8_HUMAN]	10.1483	9.64	8	4	61.5485	Q14432
C9J0K6	Sorcin OS=Homo sapiens GN=SRI PE=4 SV=1 - [C9J0K6_HUMAN]	7.87048	23.87	4	4	17.5935	B2RBV7	cDNA, FLJ95721, highly similar to Homo sapiens cullin 4A (CUL4A), mRNA OS=Homo sapiens PE=2 SV=1 - [B2RBV7_HUMAN]	10.8741	7.13	5	4	76.7557	E9PMD7	Serine/threonine-protein phosphatase (Fragment) OS=Homo sapiens GN=PPP1CA PE=3 SV=1 - [E9PMD7_HUMAN]	6.11733	9.88	14	2	28.8793	B7Z475	Transducin (beta)-like 1 X-linked receptor 1 OS=Homo sapiens GN=TBL1XR1 PE=2 SV=1 - [B7Z475_HUMAN]	11.3327	15.16	2	4	40.7308	A8K9J7	Histone H2B OS=Homo sapiens PE=2 SV=1 - [A8K9J7_HUMAN]	10.2609	35.71	19	4	13.9876	Q92974	Rho guanine nucleotide exchange factor 2 OS=Homo sapiens GN=ARHGEF2 PE=1 SV=4 - [ARHG2_HUMAN]	17.9251	7.51	5	7	111.473	B4DW90	cDNA FLJ58737, highly similar to Splicing factor 3A subunit 3 OS=Homo sapiens PE=2 SV=1 - [B4DW90_HUMAN]	10.1215	7.14	7	3	52.3951	B3KUA2
Q969X5-2	Isoform 2 of Endoplasmic reticulum-Golgi intermediate compartment protein 1 OS=Homo sapiens GN=ERGIC1 - [ERGI1_HUMAN]	7.86768	11.62	3	2	22.1462	P04150-9	Isoform Beta-B of Glucocorticoid receptor OS=Homo sapiens GN=NR3C1 - [GCR_HUMAN]	10.8583	7.54	25	4	78.6451	B4DRY6	cDNA FLJ57182, highly similar to Paxillin OS=Homo sapiens PE=2 SV=1 - [B4DRY6_HUMAN]	6.01	8.23	8	2	35.4226	D6RHZ5	SEC31 homolog A (S. cerevisiae) OS=Homo sapiens GN=SEC31A PE=4 SV=1 - [D6RHZ5_HUMAN]	11.288	6.73	10	4	96.4427	B7Z3Q4	cDNA FLJ51873, highly similar to Alkyldihydroxyacetonephosphate synthase, peroxisomal (EC 2.5.1.26) OS=Homo sapiens PE=2 SV=1 - [B7Z3Q4_HUMAN]	10.2208	8.1	3	3	63.8061	A8K8U1	cDNA FLJ77762, highly similar to Homo sapiens cullin-associated and neddylation-dissociated 1 (CAND1), mRNA OS=Homo sapiens PE=2 SV=1 - [A8K8U1_HUMAN]	17.8604	6.1	4	6	136.231	B4DVU3	Eukaryotic translation initiation factor 3 subunit C OS=Homo sapiens GN=EIF3C PE=2 SV=1 - [B4DVU3_HUMAN]	10.0527	6.04	13	4	88.1057	H0YH87
C9JPM4	ADP-ribosylation factor 4 (Fragment) OS=Homo sapiens GN=ARF4 PE=3 SV=1 - [C9JPM4_HUMAN]	7.77608	22.83	2	3	14.5438	A8K8E1	TBC1 domain family, member 15, isoform CRA_d OS=Homo sapiens GN=TBC1D15 PE=2 SV=1 - [A8K8E1_HUMAN]	10.8407	10.34	7	4	51.6285	B3KN29	cDNA FLJ13371 fis, clone PLACE1000656, highly similar to PRA1 family protein 2 OS=Homo sapiens PE=2 SV=1 - [B3KN29_HUMAN]	6.00712	16.29	2	2	19.2775	Q9UHD1	Cysteine and histidine-rich domain-containing protein 1 OS=Homo sapiens GN=CHORDC1 PE=1 SV=2 - [CHRD1_HUMAN]	11.2657	13.86	1	3	37.4656	E5RIT6	60S ribosomal protein L26-like 1 (Fragment) OS=Homo sapiens GN=RPL26L1 PE=2 SV=1 - [E5RIT6_HUMAN]	10.2146	26.56	3	4	15.1975	O76094	Signal recognition particle subunit SRP72 OS=Homo sapiens GN=SRP72 PE=1 SV=3 - [SRP72_HUMAN]	17.8126	10.13	7	5	74.56	B4E205	cDNA FLJ61651, highly similar to Protein transport protein Sec24A OS=Homo sapiens PE=2 SV=1 - [B4E205_HUMAN]	10.0503	5.02	2	3	96.2115	B4E1P2
Q96P70	Importin-9 OS=Homo sapiens GN=IPO9 PE=1 SV=3 - [IPO9_HUMAN]	7.7753	3.27	1	2	115.889	H0YJ34	Fermitin family member 2 (Fragment) OS=Homo sapiens GN=FERMT2 PE=4 SV=1 - [H0YJ34_HUMAN]	10.7798	8.59	6	5	73.3064	B4DVD7	cDNA FLJ56725, highly similar to Eukaryotic translation initiation factor 3 subunit 12 OS=Homo sapiens PE=2 SV=1 - [B4DVD7_HUMAN]	5.9873	13.74	3	2	24.4861	B4DHI8	Erythrocyte membrane protein band 4.1-like 2 OS=Homo sapiens GN=EPB41L2 PE=2 SV=1 - [B4DHI8_HUMAN]	11.2477	9.21	8	4	76.0062	Q13151	Heterogeneous nuclear ribonucleoprotein A0 OS=Homo sapiens GN=HNRNPA0 PE=1 SV=1 - [ROA0_HUMAN]	10.2065	14.43	1	3	30.8218	Q5IRN4	Myocyte enhancer factor 2D/deleted in azoospermia associated protein 1 fusion protein OS=Homo sapiens GN=MEF2D/DAZAP1 fusion PE=2 SV=1 - [Q5IRN4_HUMAN]	17.7877	9.92	5	4	50.3817	F5H442	Tumor susceptibility gene 101 protein OS=Homo sapiens GN=TSG101 PE=2 SV=1 - [F5H442_HUMAN]	9.98363	9.86	3	3	40.8917	B4DYC6
Q7Z3B4-2	Isoform 2 of Nucleoporin p54 OS=Homo sapiens GN=NUP54 - [NUP54_HUMAN]	7.76831	11.34	7	2	33.1595	B4DM70	cDNA FLJ54451, highly similar to Stress-induced-phosphoprotein 1 OS=Homo sapiens PE=2 SV=1 - [B4DM70_HUMAN]	10.752	8.29	7	4	59.7689	Q96TA1-2	Isoform 2 of Niban-like protein 1 OS=Homo sapiens GN=FAM129B - [NIBL1_HUMAN]	5.9678	3.96	2	2	82.6309	O14979-3	Isoform 3 of Heterogeneous nuclear ribonucleoprotein D-like OS=Homo sapiens GN=HNRPDL - [HNRDL_HUMAN]	11.1754	17.21	4	4	27.1746	B2R950	cDNA, FLJ94213, highly similar to Homo sapiens pregnancy-zone protein (PZP), mRNA OS=Homo sapiens PE=2 SV=1 - [B2R950_HUMAN]	10.1641	2.29	3	3	163.768	P26599	Polypyrimidine tract-binding protein 1 OS=Homo sapiens GN=PTBP1 PE=1 SV=1 - [PTBP1_HUMAN]	17.7631	10.17	4	5	57.1856	O14776	Transcription elongation regulator 1 OS=Homo sapiens GN=TCERG1 PE=1 SV=2 - [TCRG1_HUMAN]	9.92719	4.46	3	5	123.823	K7EJT5
Q8IX12-2	Isoform 2 of Cell division cycle and apoptosis regulator protein 1 OS=Homo sapiens GN=CCAR1 - [CCAR1_HUMAN]	7.74648	3.52	2	3	130.962	E5RI99	Ribosomal protein L30 (Fragment) OS=Homo sapiens GN=RPL30 PE=3 SV=1 - [E5RI99_HUMAN]	10.7123	42.11	3	4	12.6476	Q13347	Eukaryotic translation initiation factor 3 subunit I OS=Homo sapiens GN=EIF3I PE=1 SV=1 - [EIF3I_HUMAN]	5.95459	8.92	2	2	36.4786	B7Z8S8	cDNA FLJ52193, highly similar to Calpastatin OS=Homo sapiens PE=2 SV=1 - [B7Z8S8_HUMAN]	11.1566	17.63	25	4	37.7278	Q9UG63	ATP-binding cassette sub-family F member 2 OS=Homo sapiens GN=ABCF2 PE=1 SV=2 - [ABCF2_HUMAN]	10.1344	7.22	4	4	71.2446	O14980	Exportin-1 OS=Homo sapiens GN=XPO1 PE=1 SV=1 - [XPO1_HUMAN]	17.7583	6.91	6	7	123.306	Q96IF9	VCP protein (Fragment) OS=Homo sapiens GN=VCP PE=2 SV=2 - [Q96IF9_HUMAN]	9.89306	8.7	5	4	71.0211	Q9BWW4
Q9BS26	Endoplasmic reticulum resident protein 44 OS=Homo sapiens GN=ERP44 PE=1 SV=1 - [ERP44_HUMAN]	7.73634	7.14	1	2	46.9414	P13646-3	Isoform 3 of Keratin, type I cytoskeletal 13 OS=Homo sapiens GN=KRT13 - [K1C13_HUMAN]	10.7094	7.86	11	4	45.8386	P30041	Peroxiredoxin-6 OS=Homo sapiens GN=PRDX6 PE=1 SV=3 - [PRDX6_HUMAN]	5.91218	11.61	1	2	25.0192	P07954-2	Isoform Cytoplasmic of Fumarate hydratase, mitochondrial OS=Homo sapiens GN=FH - [FUMH_HUMAN]	11.152	9.21	2	3	50.1807	A8K8U1	cDNA FLJ77762, highly similar to Homo sapiens cullin-associated and neddylation-dissociated 1 (CAND1), mRNA OS=Homo sapiens PE=2 SV=1 - [A8K8U1_HUMAN]	10.1295	4.55	3	5	136.231	B3KTM6	Ribosomal protein L5, isoform CRA_b OS=Homo sapiens GN=RPL5 PE=2 SV=1 - [B3KTM6_HUMAN]	17.755	21.05	3	5	28.0262	Q6P2E9	Enhancer of mRNA-decapping protein 4 OS=Homo sapiens GN=EDC4 PE=1 SV=1 - [EDC4_HUMAN]	9.87311	3.71	1	4	151.567	P31151
B4DMY4	Cathepsin B OS=Homo sapiens GN=CTSB PE=2 SV=1 - [B4DMY4_HUMAN]	7.69062	10.2	7	2	26.8385	Q1JQ76	Ribosomal protein (Fragment) OS=Homo sapiens GN=RPL10A PE=2 SV=1 - [Q1JQ76_HUMAN]	10.6613	20.39	2	3	23.5209	H0YHC3	Nucleosome assembly protein 1-like 1 (Fragment) OS=Homo sapiens GN=NAP1L1 PE=4 SV=1 - [H0YHC3_HUMAN]	5.9071	19.19	15	3	23.4028	Q96D47	NSF protein (Fragment) OS=Homo sapiens GN=NSF PE=2 SV=2 - [Q96D47_HUMAN]	11.1508	16.56	9	4	36.1871	Q9BSM5	Putative uncharacterized protein (Fragment) OS=Homo sapiens PE=2 SV=1 - [Q9BSM5_HUMAN]	10.1063	19.13	14	4	31.733	Q59FJ2	Ubiquilin 1 isoform 1 variant (Fragment) OS=Homo sapiens PE=2 SV=1 - [Q59FJ2_HUMAN]	17.6211	12.62	6	3	34.6836	D6RAQ3	Prelamin-A/C OS=Homo sapiens GN=LMNA PE=2 SV=1 - [D6RAQ3_HUMAN]	9.87285	8.67	10	4	62.8145	Q9H2R7
D6RH18	Single-stranded DNA binding protein 2 OS=Homo sapiens GN=SSBP2 PE=4 SV=1 - [D6RH18_HUMAN]	7.67726	11.78	6	3	34.9773	F8W950	Aminoacyl tRNA synthetase complex-interacting multifunctional protein 2 OS=Homo sapiens GN=AIMP2 PE=4 SV=1 - [F8W950_HUMAN]	10.6515	19.12	5	4	27.7914	P35268	60S ribosomal protein L22 OS=Homo sapiens GN=RPL22 PE=1 SV=2 - [RL22_HUMAN]	5.89126	18.75	2	2	14.7778	Q6UUV7-3	Isoform 3 of CREB-regulated transcription coactivator 3 OS=Homo sapiens GN=CRTC3 - [CRTC3_HUMAN]	11.1351	7.77	2	3	66.7892	B4DII5	Importin subunit alpha OS=Homo sapiens PE=2 SV=1 - [B4DII5_HUMAN]	10.0975	9.19	7	4	59.6033	P51149	Ras-related protein Rab-7a OS=Homo sapiens GN=RAB7A PE=1 SV=1 - [RAB7A_HUMAN]	17.5265	38.16	8	7	23.4748	B4E1H9	cDNA FLJ53125, highly similar to Phosphoglycerate kinase 1 (EC 2.7.2.3) OS=Homo sapiens PE=2 SV=1 - [B4E1H9_HUMAN]	9.86399	15.29	5	3	35.0231	P13010
B7Z254	Protein disulfide isomerase family A, member 6 OS=Homo sapiens GN=PDIA6 PE=2 SV=1 - [B7Z254_HUMAN]	7.66224	6.64	7	2	47.8081	O95747	Serine/threonine-protein kinase OSR1 OS=Homo sapiens GN=OXSR1 PE=1 SV=1 - [OXSR1_HUMAN]	10.5964	7.21	2	3	57.9861	Q9Y265-2	Isoform 2 of RuvB-like 1 OS=Homo sapiens GN=RUVBL1 - [RUVB1_HUMAN]	5.85349	9.59	3	3	42.1	B4DW94	RAP1B, member of RAS oncogene family OS=Homo sapiens GN=RAP1B PE=2 SV=1 - [B4DW94_HUMAN]	11.1269	30.66	4	4	15.3459	D6RD69	GTP-binding protein SAR1b (Fragment) OS=Homo sapiens GN=SAR1B PE=2 SV=1 - [D6RD69_HUMAN]	10.0833	20	5	3	19.0349	O14776	Transcription elongation regulator 1 OS=Homo sapiens GN=TCERG1 PE=1 SV=2 - [TCRG1_HUMAN]	17.5214	8.2	3	9	123.823	P08559	Pyruvate dehydrogenase E1 component subunit alpha, somatic form, mitochondrial OS=Homo sapiens GN=PDHA1 PE=1 SV=3 - [ODPA_HUMAN]	9.82915	10.77	8	4	43.2676	Q9UG07
A8K984	Structural maintenance of chromosomes protein OS=Homo sapiens PE=2 SV=1 - [A8K984_HUMAN]	7.64872	2.84	3	3	135.512	B4DXY1	cDNA FLJ55045, highly similar to 26S proteasome non-ATPase regulatory subunit 2 OS=Homo sapiens PE=2 SV=1 - [B4DXY1_HUMAN]	10.5893	7.08	13	5	82.1267	B0FTY2	NudC-like protein OS=Homo sapiens PE=2 SV=1 - [B0FTY2_HUMAN]	5.8022	8.86	2	2	40.7536	E7ER27	Hydroxysteroid (17-beta) dehydrogenase 4 OS=Homo sapiens GN=HSD17B4 PE=3 SV=3 - [E7ER27_HUMAN]	11.109	10.8	3	4	53.8945	P08559	Pyruvate dehydrogenase E1 component subunit alpha, somatic form, mitochondrial OS=Homo sapiens GN=PDHA1 PE=1 SV=3 - [ODPA_HUMAN]	10.0664	8.46	7	3	43.2676	Q9Y295	Developmentally-regulated GTP-binding protein 1 OS=Homo sapiens GN=DRG1 PE=1 SV=1 - [DRG1_HUMAN]	17.4473	13.9	1	4	40.5168	P30044	Peroxiredoxin-5, mitochondrial OS=Homo sapiens GN=PRDX5 PE=1 SV=4 - [PRDX5_HUMAN]	9.70472	26.64	1	4	22.0725	Q5ZEY3
O14818-2	Isoform 2 of Proteasome subunit alpha type-7 OS=Homo sapiens GN=PSMA7 - [PSA7_HUMAN]	7.61036	16.29	6	2	20.1806	P62805	Histone H4 OS=Homo sapiens GN=HIST1H4A PE=1 SV=2 - [H4_HUMAN]	10.5858	29.13	3	3	11.3604	Q5TCI8	Lamin A/C OS=Homo sapiens GN=LMNA PE=2 SV=1 - [Q5TCI8_HUMAN]	5.79451	5.7	11	2	55.7286	P06748-2	Isoform 2 of Nucleophosmin OS=Homo sapiens GN=NPM1 - [NPM_HUMAN]	11.0675	10.19	2	2	29.4462	Q32Q67	DNM1L protein (Fragment) OS=Homo sapiens GN=DNM1L PE=2 SV=1 - [Q32Q67_HUMAN]	10.0609	7.48	11	4	64.108	O76070	Gamma-synuclein OS=Homo sapiens GN=SNCG PE=1 SV=2 - [SYUG_HUMAN]	17.4134	48.82	2	5	13.3228	P26447	Protein S100-A4 OS=Homo sapiens GN=S100A4 PE=1 SV=1 - [S10A4_HUMAN]	9.701	28.71	1	3	11.7207	Q1RMY8
B7ZL34	PUM2 protein OS=Homo sapiens GN=PUM2 PE=2 SV=1 - [B7ZL34_HUMAN]	7.59706	4.37	3	4	105.937	B7Z3U6	ATPase, Na+/K+ transporting, alpha 1 polypeptide OS=Homo sapiens GN=ATP1A1 PE=2 SV=1 - [B7Z3U6_HUMAN]	10.4912	5.75	32	4	109.48	P54920	Alpha-soluble NSF attachment protein OS=Homo sapiens GN=NAPA PE=1 SV=3 - [SNAA_HUMAN]	5.77348	8.47	1	2	33.2113	B4DM70	cDNA FLJ54451, highly similar to Stress-induced-phosphoprotein 1 OS=Homo sapiens PE=2 SV=1 - [B4DM70_HUMAN]	11.0509	7.9	6	4	59.7689	K7EQ02	DAZ-associated protein 1 (Fragment) OS=Homo sapiens GN=DAZAP1 PE=4 SV=1 - [K7EQ02_HUMAN]	10.0483	20.89	3	3	24.7892	Q2TSD2	Aging-associated gene 7 protein OS=Homo sapiens PE=2 SV=1 - [Q2TSD2_HUMAN]	17.3351	11.76	9	4	41.4361	G3V1J5	Exosome complex exonuclease RRP44 OS=Homo sapiens GN=DIS3 PE=3 SV=1 - [G3V1J5_HUMAN]	9.57835	5.03	5	3	90.5266	Q9Y6I3
P62081	40S ribosomal protein S7 OS=Homo sapiens GN=RPS7 PE=1 SV=1 - [RS7_HUMAN]	7.58665	16.49	1	3	22.1133	B3KRS7	cDNA FLJ34844 fis, clone NT2NE2011154, highly similar to RuvB-like 1 OS=Homo sapiens PE=2 SV=1 - [B3KRS7_HUMAN]	10.4534	15.87	5	4	34.661	Q9HBB9	HC56 OS=Homo sapiens PE=2 SV=1 - [Q9HBB9_HUMAN]	5.76727	3.06	4	2	118.678	P00568	Adenylate kinase isoenzyme 1 OS=Homo sapiens GN=AK1 PE=1 SV=3 - [KAD1_HUMAN]	11.0303	29.9	3	5	21.6213	A8K4T6	cDNA FLJ76282, highly similar to Homo sapiens proteasome (prosome, macropain) 26S subunit, non-ATPase, 5 (PSMD5), mRNA OS=Homo sapiens PE=2 SV=1 - [A8K4T6_HUMAN]	10.0444	11.71	2	5	56.1884	A8KAP9	cDNA FLJ78448, highly similar to Homo sapiens argininosuccinate synthetase (ASS), transcript variant 1, mRNA OS=Homo sapiens PE=2 SV=1 - [A8KAP9_HUMAN]	17.3234	13.59	5	6	46.5249	P25398	40S ribosomal protein S12 OS=Homo sapiens GN=RPS12 PE=1 SV=3 - [RS12_HUMAN]	9.41564	25.76	1	3	14.5055	B4DV79
Q8IWR8	Ribosomal protein L19 (Fragment) OS=Homo sapiens PE=2 SV=1 - [Q8IWR8_HUMAN]	7.57434	15.03	3	2	20.8068	P62269	40S ribosomal protein S18 OS=Homo sapiens GN=RPS18 PE=1 SV=3 - [RS18_HUMAN]	10.425	30.92	2	5	17.7079	Q63ZY3-3	Isoform 3 of KN motif and ankyrin repeat domain-containing protein 2 OS=Homo sapiens GN=KANK2 - [KANK2_HUMAN]	5.75928	2.97	3	2	89.9885	Q63HR1	Putative uncharacterized protein DKFZp686P17171 OS=Homo sapiens GN=DKFZp686P17171 PE=2 SV=1 - [Q63HR1_HUMAN]	11.0302	6.98	7	2	42.4153	Q01650	Large neutral amino acids transporter small subunit 1 OS=Homo sapiens GN=SLC7A5 PE=1 SV=2 - [LAT1_HUMAN]	10.0099	9.86	3	4	54.9743	F8VRJ2	Nucleosome assembly protein 1-like 1 (Fragment) OS=Homo sapiens GN=NAP1L1 PE=2 SV=1 - [F8VRJ2_HUMAN]	17.2786	34.21	21	4	13.4918	A8K9U6	cDNA FLJ76121, highly similar to Homo sapiens zinc finger CCCH-type, antiviral 1 (ZC3HAV1), transcript variant 1, mRNA OS=Homo sapiens PE=2 SV=1 - [A8K9U6_HUMAN]	9.4148	5.1	4	3	101.392	A5D8Z4
E9PJT3	Splicing factor 3b, subunit 2, 145kDa (Fragment) OS=Homo sapiens GN=SF3B2 PE=4 SV=1 - [E9PJT3_HUMAN]	7.47611	13.92	5	3	29.1163	Q9UHD1	Cysteine and histidine-rich domain-containing protein 1 OS=Homo sapiens GN=CHORDC1 PE=1 SV=2 - [CHRD1_HUMAN]	10.3698	13.86	6	3	37.4656	Q3MHD2	Protein LSM12 homolog OS=Homo sapiens GN=LSM12 PE=1 SV=2 - [LSM12_HUMAN]	5.75624	13.85	2	2	21.6871	Q13263-2	Isoform 2 of Transcription intermediary factor 1-beta OS=Homo sapiens GN=TRIM28 - [TIF1B_HUMAN]	11.0222	5.98	3	3	79.4235	B4DFA2	Vesicle-fusing ATPase OS=Homo sapiens GN=NSF PE=2 SV=1 - [B4DFA2_HUMAN]	10.002	7.3	10	4	71.5386	B4DHE8	RNA-binding protein Musashi homolog 2 OS=Homo sapiens GN=MSI2 PE=2 SV=1 - [B4DHE8_HUMAN]	17.1699	16.36	5	4	34.7901	B4DVG7	cDNA FLJ53750, highly similar to 60S ribosomal protein L8 OS=Homo sapiens PE=2 SV=1 - [B4DVG7_HUMAN]	9.32834	17.02	6	3	20.6043	Q9BZX2
B2RDM2	HCG1811539, isoform CRA_b OS=Homo sapiens GN=TXNDC5 PE=2 SV=1 - [B2RDM2_HUMAN]	7.46808	10.8	5	3	36.155	O00148	ATP-dependent RNA helicase DDX39A OS=Homo sapiens GN=DDX39A PE=1 SV=2 - [DX39A_HUMAN]	10.3587	10.54	34	4	49.098	H0YCI3	Yes-associated protein 1 (Fragment) OS=Homo sapiens GN=YAP1 PE=4 SV=1 - [H0YCI3_HUMAN]	5.74962	10.47	11	2	28.5778	E9PKD5	Proteasome (prosome, macropain) 26S subunit, ATPase, 3 (Fragment) OS=Homo sapiens GN=PSMC3 PE=3 SV=1 - [E9PKD5_HUMAN]	10.9789	21.09	4	5	32.6934	Q9Y266	Nuclear migration protein nudC OS=Homo sapiens GN=NUDC PE=1 SV=1 - [NUDC_HUMAN]	9.8789	16.01	2	4	38.2191	F8W8I6	Nucleolysin TIA-1 isoform p40 OS=Homo sapiens GN=TIA1 PE=2 SV=1 - [F8W8I6_HUMAN]	17.137	14.29	10	5	42.8075	B2R4P2	cDNA, FLJ92164, highly similar to Homo sapiens peroxiredoxin 1 (PRDX1), mRNA OS=Homo sapiens PE=2 SV=1 - [B2R4P2_HUMAN]	9.30927	28.64	4	6	22.1864	P07814
Q9H3U1-2	Isoform 2 of Protein unc-45 homolog A OS=Homo sapiens GN=UNC45A - [UN45A_HUMAN]	7.4596	2.8	2	2	101.611	E4W6B6	RPL27/NME2 fusion protein (Fragment) OS=Homo sapiens GN=RPL27 PE=2 SV=1 - [E4W6B6_HUMAN]	10.3394	22.22	3	3	14.248	Q9Y3B4	Pre-mRNA branch site protein p14 OS=Homo sapiens GN=SF3B14 PE=1 SV=1 - [PM14_HUMAN]	5.74347	18.4	1	2	14.5756	Q6PKG0-3	Isoform 2 of La-related protein 1 OS=Homo sapiens GN=LARP1 - [LARP1_HUMAN]	10.954	5.69	2	4	116.393	Q59GU6	Sorting nexin 1 isoform a variant (Fragment) OS=Homo sapiens PE=2 SV=1 - [Q59GU6_HUMAN]	9.85747	8.33	6	3	50.0679	Q53F37	SAR1a gene homolog 2 variant (Fragment) OS=Homo sapiens PE=2 SV=1 - [Q53F37_HUMAN]	17.0925	21.21	5	4	22.3955	A8K7W3	cDNA FLJ75780, highly similar to Homo sapiens SGT1, suppressor of G2 allele of SKP1 (SUGT1), mRNA OS=Homo sapiens PE=2 SV=1 - [A8K7W3_HUMAN]	9.30397	14.71	6	4	37.8099	F8W079
P53999	Activated RNA polymerase II transcriptional coactivator p15 OS=Homo sapiens GN=SUB1 PE=1 SV=3 - [TCP4_HUMAN]	7.44966	29.92	2	3	14.3864	B0AZV0	Serine/threonine kinase receptor associated protein OS=Homo sapiens GN=STRAP PE=2 SV=1 - [B0AZV0_HUMAN]	10.3315	18.36	4	3	28.4881	P61081	NEDD8-conjugating enzyme Ubc12 OS=Homo sapiens GN=UBE2M PE=1 SV=1 - [UBC12_HUMAN]	5.71156	13.11	1	2	20.8866	B4DEI3	cDNA FLJ57715, highly similar to Voltage-dependent anion-selective channel protein 1 OS=Homo sapiens PE=2 SV=1 - [B4DEI3_HUMAN]	10.898	21.15	4	3	16.6847	Q08ES8	Cell growth-inhibiting protein 34 OS=Homo sapiens PE=2 SV=1 - [Q08ES8_HUMAN]	9.83943	16.95	4	3	20.0816	H0YH87	Ataxin-2 (Fragment) OS=Homo sapiens GN=ATXN2 PE=4 SV=1 - [H0YH87_HUMAN]	16.9882	7.75	8	5	98.0546	B7Z3Y3	cDNA FLJ50557, highly similar to Homo sapiens microtubule-associated protein 7 (MAP7), mRNA OS=Homo sapiens PE=2 SV=1 - [B7Z3Y3_HUMAN]	9.29518	7.3	9	4	66.9277	B3KM36
P80723-2	Isoform 2 of Brain acid soluble protein 1 OS=Homo sapiens GN=BASP1 - [BASP1_HUMAN]	7.43042	20.23	2	2	17.6536	B4DKN9	cDNA FLJ57740, highly similar to Transforming protein RhoA OS=Homo sapiens PE=2 SV=1 - [B4DKN9_HUMAN]	10.2528	24.28	16	4	19.557	P48507	Glutamate--cysteine ligase regulatory subunit OS=Homo sapiens GN=GCLM PE=1 SV=1 - [GSH0_HUMAN]	5.69774	10.22	1	2	30.7078	F5GZ76	USO1 vesicle docking protein homolog (yeast) OS=Homo sapiens GN=USO1 PE=4 SV=1 - [F5GZ76_HUMAN]	10.8852	5.52	5	4	89.1474	Q9BR63	FARSB protein (Fragment) OS=Homo sapiens GN=FARSB PE=2 SV=2 - [Q9BR63_HUMAN]	9.80753	8.72	6	5	65.6594	H0YJ34	Fermitin family homolog 2 (Fragment) OS=Homo sapiens GN=FERMT2 PE=2 SV=1 - [H0YJ34_HUMAN]	16.9568	14.69	3	8	73.3064	D3DN77	HCG2022736, isoform CRA_a OS=Homo sapiens GN=hCG_2022736 PE=2 SV=1 - [D3DN77_HUMAN]	9.29404	21.64	6	6	30.749	B2R8R5
B4E1X2	cDNA FLJ51620, highly similar to Coatomer subunit delta OS=Homo sapiens PE=2 SV=1 - [B4E1X2_HUMAN]	7.42776	7.33	5	3	47.1757	Q96I60	6-phosphofructokinase (Fragment) OS=Homo sapiens GN=PFKM PE=2 SV=2 - [Q96I60_HUMAN]	10.2286	4.55	11	3	81.4914	H0YEN5	Ribosomal protein S2 (Fragment) OS=Homo sapiens GN=RPS2 PE=4 SV=1 - [H0YEN5_HUMAN]	5.66694	12.82	6	2	21.1404	B3KST5	COP9 constitutive photomorphogenic homolog subunit 4 (Arabidopsis), isoform CRA_a OS=Homo sapiens GN=COPS4 PE=2 SV=1 - [B3KST5_HUMAN]	10.8641	13.92	6	4	40.1717	Q5HY54	Filamin-A OS=Homo sapiens GN=FLNA PE=2 SV=1 - [Q5HY54_HUMAN]	9.77365	1.69	6	3	276.378	Q32Q67	DNM1L protein (Fragment) OS=Homo sapiens GN=DNM1L PE=2 SV=1 - [Q32Q67_HUMAN]	16.9292	11.83	14	6	64.108	Q8N9Z3	cDNA FLJ36025 fis, clone TESTI2016701, highly similar to TUMOR NECROSIS FACTOR TYPE 1 RECEPTOR ASSOCIATED PROTEIN OS=Homo sapiens PE=2 SV=1 - [Q8N9Z3_HUMAN]	9.28148	6.39	10	3	66.005	B4DT72
Q63HR1	Putative uncharacterized protein DKFZp686P17171 OS=Homo sapiens GN=DKFZp686P17171 PE=2 SV=1 - [Q63HR1_HUMAN]	7.41902	6.98	7	2	42.4153	Q562L9	Actin-like protein (Fragment) OS=Homo sapiens GN=ACT PE=2 SV=1 - [Q562L9_HUMAN]	10.1833	24.27	5	2	11.5489	E7ENQ5	Annexin A5 OS=Homo sapiens GN=ANXA5 PE=3 SV=1 - [E7ENQ5_HUMAN]	5.64949	11.23	2	2	30.8438	P62081	40S ribosomal protein S7 OS=Homo sapiens GN=RPS7 PE=1 SV=1 - [RS7_HUMAN]	10.798	20.62	1	4	22.1133	Q04917	14-3-3 protein eta OS=Homo sapiens GN=YWHAH PE=1 SV=4 - [1433F_HUMAN]	9.73111	9.76	1	2	28.201	Q86X55	Histone-arginine methyltransferase CARM1 OS=Homo sapiens GN=CARM1 PE=1 SV=3 - [CARM1_HUMAN]	16.9057	7.07	2	4	65.8114	F8VRJ2	Nucleosome assembly protein 1-like 1 (Fragment) OS=Homo sapiens GN=NAP1L1 PE=2 SV=1 - [F8VRJ2_HUMAN]	9.26799	34.21	21	3	13.4918	B4DMT5
Q92900-2	Isoform 2 of Regulator of nonsense transcripts 1 OS=Homo sapiens GN=UPF1 - [RENT1_HUMAN]	7.39583	2.95	2	3	122.958	B7Z5W0	cDNA FLJ53174, highly similar to Numb-like protein OS=Homo sapiens PE=2 SV=1 - [B7Z5W0_HUMAN]	10.1764	8.66	6	4	60.5187	P49588	Alanine--tRNA ligase, cytoplasmic OS=Homo sapiens GN=AARS PE=1 SV=2 - [SYAC_HUMAN]	5.58545	2.79	3	2	106.743	Q7L2H7	Eukaryotic translation initiation factor 3 subunit M OS=Homo sapiens GN=EIF3M PE=1 SV=1 - [EIF3M_HUMAN]	10.6589	8.82	1	3	42.4758	E9PKZ0	60S ribosomal protein L8 OS=Homo sapiens GN=RPL8 PE=4 SV=1 - [E9PKZ0_HUMAN]	9.72311	20.49	7	4	22.3752	P14923	Junction plakoglobin OS=Homo sapiens GN=JUP PE=1 SV=3 - [PLAK_HUMAN]	16.7621	6.04	5	4	81.6927	Q14677	Clathrin interactor 1 OS=Homo sapiens GN=CLINT1 PE=1 SV=1 - [EPN4_HUMAN]	9.24793	6.24	1	3	68.2158	B4DJ24
B4DUR9	Uncharacterized protein OS=Homo sapiens GN=AHSA1 PE=2 SV=1 - [B4DUR9_HUMAN]	7.38501	8.68	2	2	32.3193	P14923	Junction plakoglobin OS=Homo sapiens GN=JUP PE=1 SV=3 - [PLAK_HUMAN]	10.1522	6.04	5	3	81.6927	B4DUP0	Uncharacterized protein OS=Homo sapiens GN=EEF1G PE=2 SV=1 - [B4DUP0_HUMAN]	5.58446	18.45	3	3	24.0891	B4E363	Phenylalanyl-tRNA synthetase, alpha subunit OS=Homo sapiens GN=FARSA PE=2 SV=1 - [B4E363_HUMAN]	10.6512	10.48	2	4	54.1238	Q14444	Caprin-1 OS=Homo sapiens GN=CAPRIN1 PE=1 SV=2 - [CAPR1_HUMAN]	9.72062	5.78	5	4	78.318	B2R4C1	cDNA, FLJ92036, highly similar to Homo sapiens ribosomal protein L31 (RPL31), mRNA OS=Homo sapiens PE=2 SV=1 - [B2R4C1_HUMAN]	16.7538	32.8	8	4	14.4859	F8W840	YTH domain family protein 1 OS=Homo sapiens GN=YTHDF1 PE=2 SV=1 - [F8W840_HUMAN]	9.22973	8.25	4	3	55.3003	P81605
H0YC04	ATPase, H+ transporting, lysosomal 56/58kDa, V1 subunit B2 (Fragment) OS=Homo sapiens GN=ATP6V1B2 PE=4 SV=1 - [H0YC04_HUMAN]	7.37911	19.6	3	3	21.1	Q8NB90-2	Isoform 2 of Spermatogenesis-associated protein 5 OS=Homo sapiens GN=SPATA5 - [SPAT5_HUMAN]	10.1464	6.46	4	4	86.0228	B4DTV0	cDNA FLJ57801, highly similar to Homo sapiens AHNAK nucleoprotein (desmoyokin) (AHNAK), transcript variant 1, mRNA (Fragment) OS=Homo sapiens PE=2 SV=1 - [B4DTV0_HUMAN]	5.54793	3.24	2	2	114.065	A8K4L9	Uncharacterized protein OS=Homo sapiens GN=TIAL1 PE=2 SV=1 - [A8K4L9_HUMAN]	10.5744	9.69	1	3	43.4211	P55036	26S proteasome non-ATPase regulatory subunit 4 OS=Homo sapiens GN=PSMD4 PE=1 SV=1 - [PSMD4_HUMAN]	9.69566	11.94	3	4	40.7112	A4UCT1	Glyceraldehyde-3-phosphate dehydrogenase (Fragment) OS=Homo sapiens PE=2 SV=1 - [A4UCT1_HUMAN]	16.7436	27.71	7	3	17.292	Q9Y3U8	60S ribosomal protein L36 OS=Homo sapiens GN=RPL36 PE=1 SV=3 - [RL36_HUMAN]	9.2003	35.24	2	4	12.2459	Q8NB90
P46783	40S ribosomal protein S10 OS=Homo sapiens GN=RPS10 PE=1 SV=1 - [RS10_HUMAN]	7.36114	23.03	1	3	18.8859	B3KXE7	cDNA FLJ45304 fis, clone BRHIP3003984, highly similar to IkappaB kinase complex-associated protein OS=Homo sapiens PE=2 SV=1 - [B3KXE7_HUMAN]	10.1433	4.27	7	3	111.444	P62333	26S protease regulatory subunit 10B OS=Homo sapiens GN=PSMC6 PE=1 SV=1 - [PRS10_HUMAN]	5.52055	5.66	1	2	44.1451	O75533	Splicing factor 3B subunit 1 OS=Homo sapiens GN=SF3B1 PE=1 SV=3 - [SF3B1_HUMAN]	10.5114	4.45	1	4	145.738	P61088	Ubiquitin-conjugating enzyme E2 N OS=Homo sapiens GN=UBE2N PE=1 SV=1 - [UBE2N_HUMAN]	9.66431	21.05	5	4	17.127	E9PR38	Pumilio homolog 1 OS=Homo sapiens GN=PUM1 PE=2 SV=1 - [E9PR38_HUMAN]	16.6768	7.84	13	6	100.437	Q08ES8	Cell growth-inhibiting protein 34 OS=Homo sapiens PE=2 SV=1 - [Q08ES8_HUMAN]	9.18747	16.95	4	3	20.0816	E9PQH6
F5H669	Cleavage and polyadenylation specific factor 7, 59kDa (Fragment) OS=Homo sapiens GN=CPSF7 PE=4 SV=1 - [F5H669_HUMAN]	7.34782	9.36	5	3	41.2407	Q04637-6	Isoform E of Eukaryotic translation initiation factor 4 gamma 1 OS=Homo sapiens GN=EIF4G1 - [IF4G1_HUMAN]	10.1085	3.35	21	4	154.709	B2R8A2	cDNA, FLJ93804, highly similar to Homo sapiens gp25L2 protein (HSGP25L2G), mRNA OS=Homo sapiens PE=2 SV=1 - [B2R8A2_HUMAN]	5.50123	9.35	2	2	25.0619	B2RBV7	cDNA, FLJ95721, highly similar to Homo sapiens cullin 4A (CUL4A), mRNA OS=Homo sapiens PE=2 SV=1 - [B2RBV7_HUMAN]	10.4539	7.28	4	4	76.7557	Q14247	Src substrate cortactin OS=Homo sapiens GN=CTTN PE=1 SV=2 - [SRC8_HUMAN]	9.62768	10.36	4	4	61.5485	P55036	26S proteasome non-ATPase regulatory subunit 4 OS=Homo sapiens GN=PSMD4 PE=1 SV=1 - [PSMD4_HUMAN]	16.6721	14.59	4	4	40.7112	Q7Z427	Putative MAPK activating protein OS=Homo sapiens PE=2 SV=1 - [Q7Z427_HUMAN]	9.06135	12.29	9	3	38.6797	Q9UK41
Q06210-2	Isoform 2 of Glucosamine--fructose-6-phosphate aminotransferase [isomerizing] 1 OS=Homo sapiens GN=GFPT1 - [GFPT1_HUMAN]	7.30668	5.14	2	3	76.7103	Q5IST6	Peroxiredoxin 1 (Fragment) OS=Macaca fascicularis PE=2 SV=1 - [Q5IST6_MACFA]	10.0924	29.26	3	5	20.8527	Q14432	cGMP-inhibited 3',5'-cyclic phosphodiesterase A OS=Homo sapiens GN=PDE3A PE=1 SV=3 - [PDE3A_HUMAN]	5.39179	2.02	1	2	124.901	P22102	Trifunctional purine biosynthetic protein adenosine-3 OS=Homo sapiens GN=GART PE=1 SV=1 - [PUR2_HUMAN]	10.4113	4.06	3	4	107.699	M0QZC5	40S ribosomal protein S11 OS=Homo sapiens GN=RPS11 PE=4 SV=1 - [M0QZC5_HUMAN]	9.57006	37.29	4	6	13.9885	P43686	26S protease regulatory subunit 6B OS=Homo sapiens GN=PSMC4 PE=1 SV=2 - [PRS6B_HUMAN]	16.6369	14.83	1	6	47.3365	B4DVZ8	cDNA FLJ52432, highly similar to Leukotriene A-4 hydrolase (EC 3.3.2.6) OS=Homo sapiens PE=2 SV=1 - [B4DVZ8_HUMAN]	9.04487	7.31	2	3	63.7894	P26599
P49588	Alanine--tRNA ligase, cytoplasmic OS=Homo sapiens GN=AARS PE=1 SV=2 - [SYAC_HUMAN]	7.30641	2.89	3	2	106.743	P12273	Prolactin-inducible protein OS=Homo sapiens GN=PIP PE=1 SV=1 - [PIP_HUMAN]	10.0683	31.51	1	4	16.5618	P49756	RNA-binding protein 25 OS=Homo sapiens GN=RBM25 PE=1 SV=3 - [RBM25_HUMAN]	5.38722	3.44	1	2	100.124	C9J4Z3	Ribosomal protein L37a, isoform CRA_c OS=Homo sapiens GN=RPL37A PE=4 SV=1 - [C9J4Z3_HUMAN]	10.3806	38.24	2	2	7.61894	Q92783	Signal transducing adapter molecule 1 OS=Homo sapiens GN=STAM PE=1 SV=3 - [STAM1_HUMAN]	9.5496	6.48	3	3	59.142	B4DNN3	cDNA FLJ54453, highly similar to Glutaminyl-tRNA synthetase (EC 6.1.1.18) OS=Homo sapiens PE=2 SV=1 - [B4DNN3_HUMAN]	16.5285	8.41	16	5	82.1931	F5ATB8	Nuclear receptor subfamily 3 group C member 1 variant DL-1 OS=Homo sapiens GN=NR3C1 PE=2 SV=1 - [F5ATB8_HUMAN]	9.03595	6.04	7	3	72.0857	B4DLI2
Q02535	DNA-binding protein inhibitor ID-3 OS=Homo sapiens GN=ID3 PE=1 SV=2 - [ID3_HUMAN]	7.26343	20.17	1	2	12.9907	E9M4D4	Hemoglobin alpha-1 globin chain (Fragment) OS=Homo sapiens GN=HBA1 PE=3 SV=1 - [E9M4D4_HUMAN]	10.0547	40	7	3	10.7765	P31350	Ribonucleoside-diphosphate reductase subunit M2 OS=Homo sapiens GN=RRM2 PE=1 SV=1 - [RIR2_HUMAN]	5.37764	11.05	2	3	44.8488	B3KQ33	cDNA FLJ32715 fis, clone TESTI2000784, highly similar to Importin-4 OS=Homo sapiens PE=2 SV=1 - [B3KQ33_HUMAN]	10.3603	4.35	4	4	118.651	Q1RMG2	Adenosylhomocysteinase OS=Homo sapiens GN=AHCY PE=2 SV=1 - [Q1RMG2_HUMAN]	9.53049	13.73	2	4	33.7892	D6R9P3	Heterogeneous nuclear ribonucleoprotein A/B OS=Homo sapiens GN=HNRNPAB PE=2 SV=1 - [D6R9P3_HUMAN]	16.3346	11.43	5	3	30.284	P49588	Alanine--tRNA ligase, cytoplasmic OS=Homo sapiens GN=AARS PE=1 SV=2 - [SYAC_HUMAN]	9.0279	4.44	2	4	106.743	P83881
P42771	Cyclin-dependent kinase inhibitor 2A, isoforms 1/2/3 OS=Homo sapiens GN=CDKN2A PE=1 SV=2 - [CD2A1_HUMAN]	7.20514	18.59	2	2	16.5224	P12035	Keratin, type II cytoskeletal 3 OS=Homo sapiens GN=KRT3 PE=1 SV=3 - [K2C3_HUMAN]	10.0275	7.8	5	5	64.3776	P62258	14-3-3 protein epsilon OS=Homo sapiens GN=YWHAE PE=1 SV=1 - [1433E_HUMAN]	5.37252	12.16	3	2	29.1554	B4DUQ9	cDNA FLJ50873, highly similar to DNA replication licensing factor MCM3 OS=Homo sapiens PE=2 SV=1 - [B4DUQ9_HUMAN]	10.2649	6.69	5	4	85.5853	Q969Q0	60S ribosomal protein L36a-like OS=Homo sapiens GN=RPL36AL PE=1 SV=3 - [RL36L_HUMAN]	9.52597	38.68	2	4	12.4608	E7EX53	Ribosomal protein L15 (Fragment) OS=Homo sapiens GN=RPL15 PE=2 SV=1 - [E7EX53_HUMAN]	16.3038	27.82	6	3	15.7125	F8VX13	6-phosphofructokinase, muscle type (Fragment) OS=Homo sapiens GN=PFKM PE=2 SV=1 - [F8VX13_HUMAN]	9.00615	19.87	5	2	16.9365	C9JBJ6
P62854	40S ribosomal protein S26 OS=Homo sapiens GN=RPS26 PE=1 SV=3 - [RS26_HUMAN]	7.16645	23.48	2	2	13.0071	B4DM97	cDNA FLJ55002, highly similar to Alpha-centractin OS=Homo sapiens PE=2 SV=1 - [B4DM97_HUMAN]	9.99908	12.87	7	3	38.2507	P49773	Histidine triad nucleotide-binding protein 1 OS=Homo sapiens GN=HINT1 PE=1 SV=2 - [HINT1_HUMAN]	5.31303	23.81	1	3	13.7931	P26373	60S ribosomal protein L13 OS=Homo sapiens GN=RPL13 PE=1 SV=4 - [RL13_HUMAN]	10.223	28.91	2	6	24.2465	B7Z3Y3	cDNA FLJ50557, highly similar to Homo sapiens microtubule-associated protein 7 (MAP7), mRNA OS=Homo sapiens PE=2 SV=1 - [B7Z3Y3_HUMAN]	9.52077	9.95	9	5	66.9277	Q71RC2	La-related protein 4 OS=Homo sapiens GN=LARP4 PE=1 SV=3 - [LARP4_HUMAN]	16.2455	8.15	5	5	80.5458	F8VPE8	60S acidic ribosomal protein P0 (Fragment) OS=Homo sapiens GN=RPLP0 PE=2 SV=1 - [F8VPE8_HUMAN]	8.94161	24.18	13	3	16.6698	P62316
E9PCH7	Proteasome (prosome, macropain) inhibitor subunit 1 (PI31) OS=Homo sapiens GN=PSMF1 PE=4 SV=1 - [E9PCH7_HUMAN]	7.16409	16.36	5	2	18.3233	Q96EP5-2	Isoform 2 of DAZ-associated protein 1 OS=Homo sapiens GN=DAZAP1 - [DAZP1_HUMAN]	9.96819	12.17	4	3	40.5038	Q9H910-2	Isoform 2 of Hematological and neurological expressed 1-like protein OS=Homo sapiens GN=HN1L - [HN1L_HUMAN]	5.31127	16.09	4	2	18.4052	Q96HX3	Similar to ribophorin I (Fragment) OS=Homo sapiens PE=2 SV=1 - [Q96HX3_HUMAN]	10.2071	7.92	6	4	64.5417	H0YN73	40S ribosomal protein S17 (Fragment) OS=Homo sapiens GN=RPS17L PE=3 SV=1 - [H0YN73_HUMAN]	9.51806	20.34	4	2	6.86169	Q14432	cGMP-inhibited 3',5'-cyclic phosphodiesterase A OS=Homo sapiens GN=PDE3A PE=1 SV=3 - [PDE3A_HUMAN]	16.1129	3.68	1	4	124.901	P49327	Fatty acid synthase OS=Homo sapiens GN=FASN PE=1 SV=3 - [FAS_HUMAN]	8.88996	2.59	2	5	273.254	Q96PK6
B3KRS5	Histone deacetylase OS=Homo sapiens GN=HDAC2 PE=2 SV=1 - [B3KRS5_HUMAN]	7.15596	7.21	3	3	51.9653	P35250-2	Isoform 2 of Replication factor C subunit 2 OS=Homo sapiens GN=RFC2 - [RFC2_HUMAN]	9.95705	9.38	4	2	35.2209	C9JGE3	Ewing sarcoma breakpoint region 1, isoform CRA_e OS=Homo sapiens GN=EWSR1 PE=4 SV=1 - [C9JGE3_HUMAN]	5.30207	4.97	8	2	61.2485	P04075	Fructose-bisphosphate aldolase A OS=Homo sapiens GN=ALDOA PE=1 SV=2 - [ALDOA_HUMAN]	10.1858	13.46	1	4	39.3953	E4W6B6	RPL27/NME2 fusion protein (Fragment) OS=Homo sapiens GN=RPL27 PE=2 SV=1 - [E4W6B6_HUMAN]	9.48019	22.22	5	3	14.248	B4DS96	Putative uncharacterized protein OS=Homo sapiens PE=2 SV=1 - [B4DS96_HUMAN]	16.0549	7.43	6	4	63.7909	A6NCA8	Ubiquitin-associated protein 2 OS=Homo sapiens GN=UBAP2 PE=2 SV=2 - [A6NCA8_HUMAN]	8.88622	5.4	9	3	87.8461	B4DJP7
B4E1E2	cDNA FLJ61530, highly similar to Hepatocyte growth factor-regulated tyrosine kinase substrate OS=Homo sapiens PE=2 SV=1 - [B4E1E2_HUMAN]	7.14563	7.56	5	5	74.8076	Q99567	Nuclear pore complex protein Nup88 OS=Homo sapiens GN=NUP88 PE=1 SV=2 - [NUP88_HUMAN]	9.90517	5.4	3	3	83.4888	B4DLR8	Uncharacterized protein OS=Homo sapiens GN=NQO1 PE=2 SV=1 - [B4DLR8_HUMAN]	5.27392	8.91	6	2	22.7789	Q5U7I5	Transthyretin OS=Pan troglodytes GN=TTR PE=2 SV=1 - [TTHY_PANTR]	10.177	9.52	1	2	15.8621	F5H265	Polyubiquitin-C (Fragment) OS=Homo sapiens GN=UBC PE=2 SV=1 - [F5H265_HUMAN]	9.3491	63.09	45	4	16.8311	Q9BZX2	Uridine-cytidine kinase 2 OS=Homo sapiens GN=UCK2 PE=1 SV=1 - [UCK2_HUMAN]	16.0219	17.24	2	4	29.2811	O00231	26S proteasome non-ATPase regulatory subunit 11 OS=Homo sapiens GN=PSMD11 PE=1 SV=3 - [PSD11_HUMAN]	8.84458	8.29	3	3	47.434	B0AZM1
P01040	Cystatin-A OS=Homo sapiens GN=CSTA PE=1 SV=1 - [CYTA_HUMAN]	7.14228	37.76	1	3	10.9997	Q9BSQ6	RPL13A protein (Fragment) OS=Homo sapiens GN=RPL13A PE=2 SV=2 - [Q9BSQ6_HUMAN]	9.87582	16.92	10	3	23.3603	A8MYX1	Zinc finger protein 326 OS=Homo sapiens GN=ZNF326 PE=4 SV=1 - [A8MYX1_HUMAN]	5.25983	4.12	2	2	65.6551	B7Z4R0	Ets2 repressor factor OS=Homo sapiens GN=ERF PE=2 SV=1 - [B7Z4R0_HUMAN]	10.1664	9.73	3	3	49.934	A8MXH2	Nucleosome assembly protein 1-like 4 (Fragment) OS=Homo sapiens GN=NAP1L4 PE=2 SV=2 - [A8MXH2_HUMAN]	9.34609	18.59	15	3	18.1412	P62851	40S ribosomal protein S25 OS=Homo sapiens GN=RPS25 PE=1 SV=1 - [RS25_HUMAN]	15.9917	24	1	4	13.7337	Q14CN4	Keratin, type II cytoskeletal 72 OS=Homo sapiens GN=KRT72 PE=1 SV=2 - [K2C72_HUMAN]	8.82589	3.72	5	2	55.8424	F6W1U9
B4DS27	cDNA FLJ51288, highly similar to Kinesin heavy chain OS=Homo sapiens PE=2 SV=1 - [B4DS27_HUMAN]	7.1393	6.16	4	2	49.9481	Q96J85	C-Mpl binding protein OS=Homo sapiens GN=LARP4 PE=2 SV=1 - [Q96J85_HUMAN]	9.8352	7.73	12	2	42.4777	E5RJR5	S-phase kinase-associated protein 1 OS=Homo sapiens GN=SKP1 PE=4 SV=1 - [E5RJR5_HUMAN]	5.22724	15.34	2	2	18.7083	Q14432	cGMP-inhibited 3',5'-cyclic phosphodiesterase A OS=Homo sapiens GN=PDE3A PE=1 SV=3 - [PDE3A_HUMAN]	10.1249	4.38	1	4	124.901	O43681	ATPase ASNA1 OS=Homo sapiens GN=ASNA1 PE=1 SV=2 - [ASNA_HUMAN]	9.28808	10.63	2	3	38.7674	P62820	Ras-related protein Rab-1A OS=Homo sapiens GN=RAB1A PE=1 SV=3 - [RAB1A_HUMAN]	15.923	24.39	5	5	22.6634	B3KQT9	cDNA PSEC0175 fis, clone OVARC1000169, highly similar to Protein disulfide-isomerase A3 (EC 5.3.4.1) OS=Homo sapiens PE=2 SV=1 - [B3KQT9_HUMAN]	8.81899	12.29	6	5	54.0685	B0UX83
A8MU58	Aminoacyl tRNA synthetase complex-interacting multifunctional protein 2 OS=Homo sapiens GN=AIMP2 PE=4 SV=2 - [A8MU58_HUMAN]	7.09051	12.4	4	2	26.7429	P45974-2	Isoform Short of Ubiquitin carboxyl-terminal hydrolase 5 OS=Homo sapiens GN=USP5 - [UBP5_HUMAN]	9.83224	5.87	3	4	93.2484	Q6U2L1	C4B3 (Fragment) OS=Homo sapiens GN=C4B PE=4 SV=1 - [Q6U2L1_HUMAN]	5.14915	3.5	31	2	47.4243	Q59GU6	Sorting nexin 1 isoform a variant (Fragment) OS=Homo sapiens PE=2 SV=1 - [Q59GU6_HUMAN]	10.0852	10.88	4	4	50.0679	Q9UHX1	Poly(U)-binding-splicing factor PUF60 OS=Homo sapiens GN=PUF60 PE=1 SV=1 - [PUF60_HUMAN]	9.25823	8.77	6	4	59.8376	O95817	BAG family molecular chaperone regulator 3 OS=Homo sapiens GN=BAG3 PE=1 SV=3 - [BAG3_HUMAN]	15.9088	9.39	3	4	61.5569	J3KRI4	Cytoplasmic dynein 1 light intermediate chain 2 (Fragment) OS=Homo sapiens GN=DYNC1LI2 PE=4 SV=1 - [J3KRI4_HUMAN]	8.80441	27.54	3	3	17.767	P08579
P81605	Dermcidin OS=Homo sapiens GN=DCD PE=1 SV=2 - [DCD_HUMAN]	7.08115	12.73	2	2	11.2768	Q96KG9-5	Isoform 5 of N-terminal kinase-like protein OS=Homo sapiens GN=SCYL1 - [NTKL_HUMAN]	9.78874	6.55	12	3	69.1937	A5D904	RPS9 protein (Fragment) OS=Homo sapiens GN=RPS9 PE=2 SV=1 - [A5D904_HUMAN]	5.14213	14.16	5	2	13.1533	A8MU58	Aminoacyl tRNA synthetase complex-interacting multifunctional protein 2 OS=Homo sapiens GN=AIMP2 PE=4 SV=2 - [A8MU58_HUMAN]	10.0843	16.12	4	3	26.7429	B4DUQ9	cDNA FLJ50873, highly similar to DNA replication licensing factor MCM3 OS=Homo sapiens PE=2 SV=1 - [B4DUQ9_HUMAN]	9.25319	5.25	8	3	85.5853	Q59F96	ATP-binding cassette, sub-family F, member 1 variant (Fragment) OS=Homo sapiens PE=2 SV=1 - [Q59F96_HUMAN]	15.9068	10.46	4	5	67.3809	H0YH81	ATP synthase subunit beta (Fragment) OS=Homo sapiens GN=ATP5B PE=3 SV=1 - [H0YH81_HUMAN]	8.77113	12.98	6	3	38.2249	B2R4V2
Q15046	Lysine--tRNA ligase OS=Homo sapiens GN=KARS PE=1 SV=3 - [SYK_HUMAN]	7.06586	5.86	2	3	68.0046	F8VZJ2	Nascent polypeptide-associated complex alpha subunit OS=Homo sapiens GN=NACA PE=4 SV=1 - [F8VZJ2_HUMAN]	9.78317	41.91	11	4	15.0068	O14660	GARS-AIRS-GART (Fragment) OS=Homo sapiens PE=2 SV=1 - [O14660_HUMAN]	5.12905	21.78	4	2	10.7258	B4DE36	Glucose-6-phosphate isomerase OS=Homo sapiens PE=2 SV=1 - [B4DE36_HUMAN]	10.0708	8.87	4	3	60.1477	J3KPM9	Signal transducer and activator of transcription 1-alpha/beta OS=Homo sapiens GN=STAT1 PE=4 SV=1 - [J3KPM9_HUMAN]	9.2001	6.44	2	3	83.3076	B5BU72	Phosphatidylinositol-binding clathrin assembly protein isoform 2 OS=Homo sapiens GN=PICALM PE=2 SV=1 - [B5BU72_HUMAN]	15.9066	9.51	7	5	66.3518	P49207	60S ribosomal protein L34 OS=Homo sapiens GN=RPL34 PE=1 SV=3 - [RL34_HUMAN]	8.72279	35.9	2	5	13.2845	B2R679
Q8IWE2	Protein NOXP20 OS=Homo sapiens GN=FAM114A1 PE=1 SV=2 - [NXP20_HUMAN]	7.06164	5.68	1	2	60.7041	P31947-2	Isoform 2 of 14-3-3 protein sigma OS=Homo sapiens GN=SFN - [1433S_HUMAN]	9.77636	15.74	14	4	24.321	Q53T09	Putative uncharacterized protein XRCC5 (Fragment) OS=Homo sapiens GN=XRCC5 PE=2 SV=1 - [Q53T09_HUMAN]	5.12487	5.81	2	3	64.2029	P18621	60S ribosomal protein L17 OS=Homo sapiens GN=RPL17 PE=1 SV=3 - [RL17_HUMAN]	10.0623	21.74	1	3	21.3833	Q14432	cGMP-inhibited 3',5'-cyclic phosphodiesterase A OS=Homo sapiens GN=PDE3A PE=1 SV=3 - [PDE3A_HUMAN]	9.19085	3.86	1	4	124.901	Q9UHV9	Prefoldin subunit 2 OS=Homo sapiens GN=PFDN2 PE=1 SV=1 - [PFD2_HUMAN]	15.8816	24.03	1	3	16.6376	E9PF10	Nuclear pore complex protein Nup155 OS=Homo sapiens GN=NUP155 PE=2 SV=1 - [E9PF10_HUMAN]	8.70088	3.09	3	3	148	B4DXY1
E9PS45	Proteasome (prosome, macropain) 26S subunit, ATPase, 3 (Fragment) OS=Homo sapiens GN=PSMC3 PE=4 SV=1 - [E9PS45_HUMAN]	7.01597	17.71	7	2	19.8864	D3DN77	HCG2022736, isoform CRA_a OS=Homo sapiens GN=hCG_2022736 PE=4 SV=1 - [D3DN77_HUMAN]	9.77625	21.27	10	6	30.749	P31151	Protein S100-A7 OS=Homo sapiens GN=S100A7 PE=1 SV=4 - [S10A7_HUMAN]	5.10406	23.76	1	2	11.4636	B4DM97	cDNA FLJ55002, highly similar to Alpha-centractin OS=Homo sapiens PE=2 SV=1 - [B4DM97_HUMAN]	10.0447	7.78	2	2	38.2507	B4DKX4	cDNA FLJ58014, highly similar to Homo sapiens programmed cell death 4, transcript variant 1, mRNA OS=Homo sapiens PE=2 SV=1 - [B4DKX4_HUMAN]	9.12122	9.45	3	4	50.1974	B3KWY7	Signal recognition particle subunit SRP68 OS=Homo sapiens PE=2 SV=1 - [B3KWY7_HUMAN]	15.8552	10.53	8	5	66.068	O15427	Monocarboxylate transporter 4 OS=Homo sapiens GN=SLC16A3 PE=1 SV=1 - [MOT4_HUMAN]	8.68766	8.82	2	4	49.4369	Q9UBV8
O60884	DnaJ homolog subfamily A member 2 OS=Homo sapiens GN=DNAJA2 PE=1 SV=1 - [DNJA2_HUMAN]	7.01484	11.65	1	4	45.7166	P57740	Nuclear pore complex protein Nup107 OS=Homo sapiens GN=NUP107 PE=1 SV=1 - [NU107_HUMAN]	9.74748	5.62	5	4	106.307	F8VS58	Ribosomal protein, large, P0 (Fragment) OS=Homo sapiens GN=RPLP0 PE=3 SV=1 - [F8VS58_HUMAN]	5.08721	15.7	13	2	13.8194	B2RCV1	cDNA, FLJ96310, highly similar to Homo sapiens solute carrier family 25 (mitochondrial carrier; adenine nucleotide translocator), member 5 (SLC25A5), mRNA OS=Homo sapiens PE=2 SV=1 - [B2RCV1_HUMAN]	10.0303	17.79	3	5	32.8341	B5BU72	Phosphatidylinositol-binding clathrin assembly protein isoform 2 OS=Homo sapiens GN=PICALM PE=2 SV=1 - [B5BU72_HUMAN]	9.09443	7.05	4	3	66.3518	Q14204	Cytoplasmic dynein 1 heavy chain 1 OS=Homo sapiens GN=DYNC1H1 PE=1 SV=5 - [DYHC1_HUMAN]	15.8305	1.72	1	7	532.072	Q9UDY4	DnaJ homolog subfamily B member 4 OS=Homo sapiens GN=DNAJB4 PE=1 SV=1 - [DNJB4_HUMAN]	8.6732	13.06	3	3	37.7831	O14828
B4DDL9	cDNA FLJ54979, highly similar to Homo sapiens cyclin-dependent kinase 2 (CDK2), transcript variant 2, mRNA OS=Homo sapiens PE=2 SV=1 - [B4DDL9_HUMAN]	7.00984	15.97	5	3	27.1455	P63096	Guanine nucleotide-binding protein G(i) subunit alpha-1 OS=Homo sapiens GN=GNAI1 PE=1 SV=2 - [GNAI1_HUMAN]	9.69462	13.56	33	4	40.3352	G3V113	Ubiquitin-conjugating enzyme E2 variant 2, isoform CRA_a OS=Homo sapiens GN=UBE2V2 PE=4 SV=1 - [G3V113_HUMAN]	5.08225	18.1	3	2	12.0091	O00743-2	Isoform 2 of Serine/threonine-protein phosphatase 6 catalytic subunit OS=Homo sapiens GN=PPP6C - [PPP6_HUMAN]	9.99848	14.13	3	3	32.5113	B7Z6Y2	cDNA FLJ54942, highly similar to Homo sapiens bridging integrator 1 (BIN1), transcript variant 10, mRNA OS=Homo sapiens PE=2 SV=1 - [B7Z6Y2_HUMAN]	9.06576	12.99	5	3	43.1385	A8K9U0	cDNA FLJ78260, highly similar to Homo sapiens RNA binding motif protein 4, mRNA OS=Homo sapiens PE=2 SV=1 - [A8K9U0_HUMAN]	15.7978	15.11	8	5	40.2586	P61106	Ras-related protein Rab-14 OS=Homo sapiens GN=RAB14 PE=1 SV=4 - [RAB14_HUMAN]	8.65648	26.51	1	4	23.8819	Q2TSD2
P62750	60S ribosomal protein L23a OS=Homo sapiens GN=RPL23A PE=1 SV=1 - [RL23A_HUMAN]	7.00782	20.51	3	3	17.6841	A6NDY9	Filamin A OS=Homo sapiens GN=FLNA PE=2 SV=4 - [A6NDY9_HUMAN]	9.6878	1.77	17	3	245.713	G5E9C2	Nuclear factor of kappa light polypeptide gene enhancer in B-cells inhibitor, beta OS=Homo sapiens GN=NFKBIB PE=4 SV=1 - [G5E9C2_HUMAN]	5.06264	9.48	4	2	32.7801	Q01650	Large neutral amino acids transporter small subunit 1 OS=Homo sapiens GN=SLC7A5 PE=1 SV=2 - [LAT1_HUMAN]	9.95934	8.88	1	3	54.9743	P16152	Carbonyl reductase [NADPH] 1 OS=Homo sapiens GN=CBR1 PE=1 SV=3 - [CBR1_HUMAN]	9.01682	20.22	6	4	30.3559	Q9NR46	Endophilin-B2 OS=Homo sapiens GN=SH3GLB2 PE=1 SV=1 - [SHLB2_HUMAN]	15.7452	16.71	4	6	43.9466	P08754	Guanine nucleotide-binding protein G(k) subunit alpha OS=Homo sapiens GN=GNAI3 PE=1 SV=3 - [GNAI3_HUMAN]	8.64221	14.97	1	4	40.5063	K7EQ02
A6ZKI3	Protein FAM127A OS=Homo sapiens GN=FAM127A PE=1 SV=1 - [F127A_HUMAN]	6.99462	26.55	1	3	13.1628	P50395	Rab GDP dissociation inhibitor beta OS=Homo sapiens GN=GDI2 PE=1 SV=2 - [GDIB_HUMAN]	9.66935	10.11	11	3	50.6309	P62851	40S ribosomal protein S25 OS=Homo sapiens GN=RPS25 PE=1 SV=1 - [RS25_HUMAN]	4.97682	15.2	1	2	13.7337	P15531	Nucleoside diphosphate kinase A OS=Homo sapiens GN=NME1 PE=1 SV=1 - [NDKA_HUMAN]	9.88754	34.87	2	4	17.1377	O14929	Histone acetyltransferase type B catalytic subunit OS=Homo sapiens GN=HAT1 PE=1 SV=1 - [HAT1_HUMAN]	9.01266	9.31	1	3	49.4808	P61160	Actin-related protein 2 OS=Homo sapiens GN=ACTR2 PE=1 SV=1 - [ARP2_HUMAN]	15.6806	9.39	5	3	44.7322	P35232	Prohibitin OS=Homo sapiens GN=PHB PE=1 SV=1 - [PHB_HUMAN]	8.61268	19.12	8	4	29.7859	Q8IX12
D3DP78	Aspartyl-tRNA synthetase, isoform CRA_b OS=Homo sapiens GN=DARS PE=3 SV=1 - [D3DP78_HUMAN]	6.99315	8.76	2	3	53.4303	Q96HX3	Similar to ribophorin I (Fragment) OS=Homo sapiens PE=2 SV=1 - [Q96HX3_HUMAN]	9.66315	8.27	9	4	64.5417	Q9H7S9	Zinc finger protein 703 OS=Homo sapiens GN=ZNF703 PE=1 SV=1 - [ZN703_HUMAN]	4.9683	5.93	1	3	58.1859	E9PPJ0	Splicing factor 3b, subunit 2, 145kDa OS=Homo sapiens GN=SF3B2 PE=4 SV=1 - [E9PPJ0_HUMAN]	9.84604	5.24	2	4	98.1089	F5H442	Tumor susceptibility gene 101 protein OS=Homo sapiens GN=TSG101 PE=2 SV=1 - [F5H442_HUMAN]	8.9998	10.96	3	3	40.8917	A4QN19	SEC16A protein (Fragment) OS=Homo sapiens GN=SEC16A PE=2 SV=1 - [A4QN19_HUMAN]	15.5226	3.53	5	4	186.378	C9J4Z3	60S ribosomal protein L37a OS=Homo sapiens GN=RPL37A PE=4 SV=1 - [C9J4Z3_HUMAN]	8.59019	38.24	2	2	7.61894	A5D6Y6
A8K566	cDNA FLJ78246, highly similar to Homo sapiens splicing factor 3a, subunit 3, 60kDa (SF3A3), mRNA OS=Homo sapiens PE=2 SV=1 - [A8K566_HUMAN]	6.97287	5.59	5	3	58.7543	B4DW05	Uncharacterized protein OS=Homo sapiens GN=PHB2 PE=2 SV=1 - [B4DW05_HUMAN]	9.63835	17.84	9	3	23.6876	F8WDD7	Actin related protein 2/3 complex, subunit 4, 20kDa OS=Homo sapiens GN=ARPC4 PE=4 SV=1 - [F8WDD7_HUMAN]	4.92099	19.47	6	2	13.049	B4DT28	Heterogeneous nuclear ribonucleoprotein R, isoform CRA_a OS=Homo sapiens GN=HNRPR PE=2 SV=1 - [B4DT28_HUMAN]	9.80495	11.13	6	5	55.6837	O60701	UDP-glucose 6-dehydrogenase OS=Homo sapiens GN=UGDH PE=1 SV=1 - [UGDH_HUMAN]	8.97452	7.49	2	3	54.9893	H0YMZ1	Proteasome subunit alpha type (Fragment) OS=Homo sapiens GN=PSMA4 PE=2 SV=1 - [H0YMZ1_HUMAN]	15.4946	15.38	9	3	24.5674	B2R950	cDNA, FLJ94213, highly similar to Homo sapiens pregnancy-zone protein (PZP), mRNA OS=Homo sapiens PE=2 SV=1 - [B2R950_HUMAN]	8.53975	2.29	2	3	163.768	B4DFK1
B4E261	cDNA FLJ55646, highly similar to Adapter-relatedprotein complex 2 beta-1 subunit OS=Homo sapiens PE=2 SV=1 - [B4E261_HUMAN]	6.95129	3.92	12	2	76.1956	P53396-2	Isoform 2 of ATP-citrate synthase OS=Homo sapiens GN=ACLY - [ACLY_HUMAN]	9.62701	4.22	6	4	119.695	Q14476	G-gamma-hemoglobin gene from Greek HPFH mutant, . (Fragment) OS=Homo sapiens PE=2 SV=1 - [Q14476_HUMAN]	4.88242	22.77	12	2	11.0326	Q15126	Phosphomevalonate kinase OS=Homo sapiens GN=PMVK PE=1 SV=3 - [PMVK_HUMAN]	9.80443	21.88	1	4	21.9812	B4DHC4	cDNA FLJ51843, highly similar to 14-3-3 protein gamma OS=Homo sapiens PE=2 SV=1 - [B4DHC4_HUMAN]	8.96667	8.89	3	2	25.6406	Q9NT62	Ubiquitin-like-conjugating enzyme ATG3 OS=Homo sapiens GN=ATG3 PE=1 SV=1 - [ATG3_HUMAN]	15.3347	11.46	1	3	35.8415	B2R6Q2	Alkaline phosphatase OS=Homo sapiens PE=2 SV=1 - [B2R6Q2_HUMAN]	8.47723	7.44	3	3	57.2436	B4E1W1
Q01469	Fatty acid-binding protein, epidermal OS=Homo sapiens GN=FABP5 PE=1 SV=3 - [FABP5_HUMAN]	6.89858	17.04	1	2	15.1546	Q9UDY4	DnaJ homolog subfamily B member 4 OS=Homo sapiens GN=DNAJB4 PE=1 SV=1 - [DNJB4_HUMAN]	9.58795	13.06	4	3	37.7831	F5H669	Cleavage and polyadenylation specific factor 7, 59kDa (Fragment) OS=Homo sapiens GN=CPSF7 PE=4 SV=1 - [F5H669_HUMAN]	4.86483	7.22	5	2	41.2407	B7Z254	Protein disulfide isomerase family A, member 6 OS=Homo sapiens GN=PDIA6 PE=2 SV=1 - [B7Z254_HUMAN]	9.80021	7.09	7	2	47.8081	Q16555	Dihydropyrimidinase-related protein 2 OS=Homo sapiens GN=DPYSL2 PE=1 SV=1 - [DPYL2_HUMAN]	8.9402	8.92	5	4	62.2546	Q05DH1	Proteasome subunit alpha type (Fragment) OS=Homo sapiens GN=PSMA7 PE=2 SV=1 - [Q05DH1_HUMAN]	15.3209	20.59	7	4	26.6971	Q71UM6	Beta-subunit signal transducing proteins GS/GI (Fragment) OS=Homo sapiens PE=2 SV=1 - [Q71UM6_HUMAN]	8.45425	16.91	5	3	22.4395	B0V043
A8MV37	SEC13 homolog (S. cerevisiae) OS=Homo sapiens GN=SEC13 PE=4 SV=1 - [A8MV37_HUMAN]	6.8757	9.09	4	2	33.9904	Q96GX3	KIAA0118 protein (Fragment) OS=Homo sapiens PE=2 SV=1 - [Q96GX3_HUMAN]	9.55769	16	2	2	19.3357	Q9HCX6	CAMP-specific phosphodiesterase 4D OS=Homo sapiens GN=PDE4DN2 PE=2 SV=1 - [Q9HCX6_HUMAN]	4.86196	15.33	11	2	16.5523	O43399	Tumor protein D54 OS=Homo sapiens GN=TPD52L2 PE=1 SV=2 - [TPD54_HUMAN]	9.76694	17.48	4	3	22.2243	P23381	Tryptophan--tRNA ligase, cytoplasmic OS=Homo sapiens GN=WARS PE=1 SV=2 - [SYWC_HUMAN]	8.93173	9.34	1	3	53.1316	O94776	Metastasis-associated protein MTA2 OS=Homo sapiens GN=MTA2 PE=1 SV=1 - [MTA2_HUMAN]	15.2897	9.28	2	5	74.9757	Q16555	Dihydropyrimidinase-related protein 2 OS=Homo sapiens GN=DPYSL2 PE=1 SV=1 - [DPYL2_HUMAN]	8.453	9.27	4	4	62.2546	Q59H27
Q96C19	EF-hand domain-containing protein D2 OS=Homo sapiens GN=EFHD2 PE=1 SV=1 - [EFHD2_HUMAN]	6.82997	12.08	1	2	26.6805	Q969S3	Zinc finger protein 622 OS=Homo sapiens GN=ZNF622 PE=1 SV=1 - [ZN622_HUMAN]	9.54913	6.5	1	2	54.2374	H0YFS2	Solute carrier family 3 (activators of dibasic and neutral amino acid transport), member 2 (Fragment) OS=Homo sapiens GN=SLC3A2 PE=4 SV=1 - [H0YFS2_HUMAN]	4.86001	10.93	8	2	26.1413	B4DSL3	cDNA FLJ59412 OS=Homo sapiens PE=2 SV=1 - [B4DSL3_HUMAN]	9.74983	6.03	6	3	76.4852	F5H7X1	26S proteasome non-ATPase regulatory subunit 9 OS=Homo sapiens GN=PSMD9 PE=2 SV=1 - [F5H7X1_HUMAN]	8.92566	41.18	6	3	9.42455	C9J0D1	Histone H2A OS=Homo sapiens GN=H2AFV PE=2 SV=1 - [C9J0D1_HUMAN]	15.28	21.31	7	3	13.155	D6RF44	Heterogeneous nuclear ribonucleoprotein D0 (Fragment) OS=Homo sapiens GN=HNRNPD PE=2 SV=1 - [D6RF44_HUMAN]	8.37789	28.57	8	3	12.6325	Q4LE79
F8VRJ2	Nucleosome assembly protein 1-like 1 (Fragment) OS=Homo sapiens GN=NAP1L1 PE=3 SV=1 - [F8VRJ2_HUMAN]	6.80563	34.21	15	3	13.4918	O75533	Splicing factor 3B subunit 1 OS=Homo sapiens GN=SF3B1 PE=1 SV=3 - [SF3B1_HUMAN]	9.53761	4.6	5	4	145.738	Q08211	ATP-dependent RNA helicase A OS=Homo sapiens GN=DHX9 PE=1 SV=4 - [DHX9_HUMAN]	4.82007	2.05	1	2	140.869	B4DL61	cDNA FLJ60291 OS=Homo sapiens PE=2 SV=1 - [B4DL61_HUMAN]	9.70668	12.68	4	3	39.8883	Q5VU21	PAI-1 mRNA-binding protein variant OS=Homo sapiens PE=2 SV=1 - [Q5VU21_HUMAN]	8.87101	5.68	5	2	42.4013	Q53FK0	MutS homolog 2 variant (Fragment) OS=Homo sapiens PE=2 SV=1 - [Q53FK0_HUMAN]	15.2082	7.97	9	6	98.1602	Q15836	Vesicle-associated membrane protein 3 OS=Homo sapiens GN=VAMP3 PE=1 SV=3 - [VAMP3_HUMAN]	8.32095	33	2	2	11.302	B4DKX4
B4DVN1	Uncharacterized protein OS=Homo sapiens GN=DNAJB6 PE=2 SV=1 - [B4DVN1_HUMAN]	6.78468	11.19	4	2	29.469	E7EQV9	Ribosomal protein L15 (Fragment) OS=Homo sapiens GN=RPL15 PE=3 SV=1 - [E7EQV9_HUMAN]	9.51237	24.14	8	3	20.4971	B3KM42	cDNA FLJ10219 fis, clone HEMBA1007018, highly similar to Cytoplasmic dynein 1 light intermediate chain 1 OS=Homo sapiens PE=2 SV=1 - [B3KM42_HUMAN]	4.81746	8.22	3	2	41.0552	B4DWZ4	cDNA FLJ51365, highly similar to Flap endonuclease 1 (EC 3.1.-.-) OS=Homo sapiens PE=2 SV=1 - [B4DWZ4_HUMAN]	9.6938	11.05	2	3	38.7671	H7C5W9	Sarcoplasmic/endoplasmic reticulum calcium ATPase 2 (Fragment) OS=Homo sapiens GN=ATP2A2 PE=3 SV=1 - [H7C5W9_HUMAN]	8.85699	4.29	4	3	102.523	Q8N8M9	cDNA FLJ39190 fis, clone OCBBF2004647, highly similar to ARFAPTIN 1 OS=Homo sapiens PE=2 SV=1 - [Q8N8M9_HUMAN]	15.1984	16.33	4	4	28.398	B5MCX3	Septin-2 OS=Homo sapiens GN=SEPT2 PE=2 SV=1 - [B5MCX3_HUMAN]	8.31325	10.28	2	2	36.9169	B1ALA9
B4DU91	Epsin 1 OS=Homo sapiens GN=EPN1 PE=2 SV=1 - [B4DU91_HUMAN]	6.7844	5.78	4	3	55.7975	E9PQR7	Vacuolar protein sorting 28 homolog (S. cerevisiae) (Fragment) OS=Homo sapiens GN=VPS28 PE=4 SV=1 - [E9PQR7_HUMAN]	9.48256	23.6	4	3	18.4574	B2R514	cDNA, FLJ92300, Homo sapiens COP9 subunit 6 (MOV34 homolog, 34 kD) (COPS6), mRNA OS=Homo sapiens PE=2 SV=1 - [B2R514_HUMAN]	4.79747	10.44	3	2	33.554	B7Z4K8	cDNA FLJ52869, highly similar to Homo sapiens basic leucine zipper and W2 domains 2 (BZW2), mRNA OS=Homo sapiens PE=2 SV=1 - [B7Z4K8_HUMAN]	9.66401	13.74	4	5	45.2795	A0PJJ5	SRP72 protein (Fragment) OS=Homo sapiens GN=SRP72 PE=2 SV=1 - [A0PJJ5_HUMAN]	8.81419	6.44	5	3	62.6046	Q5DT20	Hornerin OS=Homo sapiens GN=HRNR PE=2 SV=1 - [Q5DT20_HUMAN]	15.1795	5.16	2	3	282.199	Q5J8M4	Migration-inducing gene 14 OS=Homo sapiens PE=2 SV=1 - [Q5J8M4_HUMAN]	8.28745	8.81	2	3	39.4532	Q5TEE2
Q9NXV6	CDKN2A-interacting protein OS=Homo sapiens GN=CDKN2AIP PE=1 SV=3 - [CARF_HUMAN]	6.74789	5.34	1	2	61.0879	Q15008	26S proteasome non-ATPase regulatory subunit 6 OS=Homo sapiens GN=PSMD6 PE=1 SV=1 - [PSMD6_HUMAN]	9.44362	14.65	7	5	45.5023	B7Z5Z9	cDNA FLJ51066, highly similar to Ras-related protein Rab-6A OS=Homo sapiens PE=2 SV=1 - [B7Z5Z9_HUMAN]	4.78677	17.36	8	1	16.6075	Q7Z427	Putative MAPK activating protein OS=Homo sapiens PE=2 SV=1 - [Q7Z427_HUMAN]	9.61694	7.54	4	2	38.6797	B7ZLF0	Fibronectin 1 OS=Homo sapiens GN=FN1 PE=2 SV=1 - [B7ZLF0_HUMAN]	8.77896	1.65	6	3	239.471	Q9NR31	GTP-binding protein SAR1a OS=Homo sapiens GN=SAR1A PE=1 SV=1 - [SAR1A_HUMAN]	15.0976	21.21	6	4	22.3525	Q9UG63	ATP-binding cassette sub-family F member 2 OS=Homo sapiens GN=ABCF2 PE=1 SV=2 - [ABCF2_HUMAN]	8.25617	6.42	4	4	71.2446	F2Z388
F5GYN4	OTU domain, ubiquitin aldehyde binding 1 OS=Homo sapiens GN=OTUB1 PE=4 SV=1 - [F5GYN4_HUMAN]	6.71636	11.2	5	2	28.033	Q8N9Z3	cDNA FLJ36025 fis, clone TESTI2016701, highly similar to TUMOR NECROSIS FACTOR TYPE 1 RECEPTOR ASSOCIATED PROTEIN OS=Homo sapiens PE=2 SV=1 - [Q8N9Z3_HUMAN]	9.43746	7.77	9	4	66.005	P26038	Moesin OS=Homo sapiens GN=MSN PE=1 SV=3 - [MOES_HUMAN]	4.77609	4.68	1	3	67.7778	E9PDM8	SEC24 family, member D (S. cerevisiae) OS=Homo sapiens GN=SEC24D PE=4 SV=1 - [E9PDM8_HUMAN]	9.51236	6.49	5	3	74.9048	G5E9S1	Eukaryotic translation initiation factor 4 gamma 1 OS=Homo sapiens GN=EIF4G1 PE=4 SV=1 - [G5E9S1_HUMAN]	8.74768	3.99	13	4	154.837	B7Z7A3	Nucleolar GTP-binding protein 1 OS=Homo sapiens GN=GTPBP4 PE=2 SV=1 - [B7Z7A3_HUMAN]	15.0937	8.69	8	5	68.2297	Q92615	La-related protein 4B OS=Homo sapiens GN=LARP4B PE=1 SV=3 - [LAR4B_HUMAN]	8.21293	6.78	1	4	80.5026	J3KMX1
A9XXE1	Gamma-synuclein OS=Homo sapiens GN=SNCG PE=4 SV=1 - [A9XXE1_HUMAN]	6.69547	37.97	2	2	8.31913	F5H399	RAB2A, member RAS oncogene family OS=Homo sapiens GN=RAB2A PE=3 SV=1 - [F5H399_HUMAN]	9.41103	25.9	10	3	18.3551	F5H6W1	Eukaryotic translation initiation factor 2B, subunit 4 delta, 67kDa OS=Homo sapiens GN=EIF2B4 PE=3 SV=1 - [F5H6W1_HUMAN]	4.76854	4.62	5	2	57.4602	P52948-6	Isoform 6 of Nuclear pore complex protein Nup98-Nup96 OS=Homo sapiens GN=NUP98 - [NUP98_HUMAN]	9.49476	3.15	4	5	186.153	P60953	Cell division control protein 42 homolog OS=Homo sapiens GN=CDC42 PE=1 SV=2 - [CDC42_HUMAN]	8.72241	16.75	5	3	21.245	P05109	Protein S100-A8 OS=Homo sapiens GN=S100A8 PE=1 SV=1 - [S10A8_HUMAN]	15.093	32.26	1	3	10.8276	P07954	Fumarate hydratase, mitochondrial OS=Homo sapiens GN=FH PE=1 SV=3 - [FUMH_HUMAN]	8.17375	6.27	1	2	54.6022	B2R6Q2
P62306	Small nuclear ribonucleoprotein F OS=Homo sapiens GN=SNRPF PE=1 SV=1 - [RUXF_HUMAN]	6.65316	31.4	1	3	9.71878	Q13085-3	Isoform 3 of Acetyl-CoA carboxylase 1 OS=Homo sapiens GN=ACACA - [ACACA_HUMAN]	9.37085	2.69	17	5	257.075	B3KTJ9	cDNA FLJ38393 fis, clone FEBRA2007212 OS=Homo sapiens PE=2 SV=1 - [B3KTJ9_HUMAN]	4.7314	2.6	3	2	102.866	Q5JR07	Ras homolog gene family, member C (Fragment) OS=Homo sapiens GN=RHOC PE=2 SV=1 - [Q5JR07_HUMAN]	9.43868	26.77	10	3	14.3753	B2RBV7	cDNA, FLJ95721, highly similar to Homo sapiens cullin 4A (CUL4A), mRNA OS=Homo sapiens PE=2 SV=1 - [B2RBV7_HUMAN]	8.70902	7.89	5	5	76.7557	B4DRU0	Eukaryotic translation initiation factor 3 subunit C OS=Homo sapiens GN=EIF3C PE=2 SV=1 - [B4DRU0_HUMAN]	15.0795	9.25	11	6	84.9132	B4E3Q9	cDNA FLJ59659, highly similar to Vinculin OS=Homo sapiens PE=2 SV=1 - [B4E3Q9_HUMAN]	8.11487	4.21	4	3	100.875	P30040
B4DMT5	Uncharacterized protein OS=Homo sapiens GN=EIF3F PE=2 SV=1 - [B4DMT5_HUMAN]	6.6346	9.12	3	2	33.219	P38159-2	Isoform 2 of RNA-binding motif protein, X chromosome OS=Homo sapiens GN=RBMX - [RBMX_HUMAN]	9.35807	9.52	8	3	40.8216	G1UI19	Importin subunit alpha-7 (Fragment) OS=Homo sapiens GN=KPNA6 PE=2 SV=1 - [G1UI19_HUMAN]	4.71886	10.16	8	2	28.0282	P0CW22	40S ribosomal protein S17-like OS=Homo sapiens GN=RPS17L PE=3 SV=1 - [RS17L_HUMAN]	9.4049	13.33	3	3	15.5404	P13010	X-ray repair cross-complementing protein 5 OS=Homo sapiens GN=XRCC5 PE=1 SV=3 - [XRCC5_HUMAN]	8.70546	8.74	3	6	82.6523	Q01650	Large neutral amino acids transporter small subunit 1 OS=Homo sapiens GN=SLC7A5 PE=1 SV=2 - [LAT1_HUMAN]	15.0755	9.47	2	3	54.9743	A8K897	cDNA FLJ78686, highly similar to Homo sapiens nucleoporin 93kDa (NUP93), mRNA OS=Homo sapiens PE=2 SV=1 - [A8K897_HUMAN]	8.07788	6.35	4	4	93.3236	F8W181
B2R774	cDNA, FLJ93313, highly similar to Homo sapiens lectin, mannose-binding, 1 (LMAN1), mRNA OS=Homo sapiens PE=2 SV=1 - [B2R774_HUMAN]	6.6234	6.86	3	4	57.483	A8K566	cDNA FLJ78246, highly similar to Homo sapiens splicing factor 3a, subunit 3, 60kDa (SF3A3), mRNA OS=Homo sapiens PE=2 SV=1 - [A8K566_HUMAN]	9.31114	9.18	7	4	58.7543	B2R6U8	cDNA, FLJ93125, highly similar to Homo sapiens cleavage and polyadenylation specific factor 5, 25 kDa(CPSF5), mRNA OS=Homo sapiens PE=2 SV=1 - [B2R6U8_HUMAN]	4.71495	10.13	2	2	26.1987	B4DUX0	Uncharacterized protein OS=Homo sapiens GN=ACOT7 PE=2 SV=1 - [B4DUX0_HUMAN]	9.39889	16.23	6	3	29.6261	B2RCV1	cDNA, FLJ96310, highly similar to Homo sapiens solute carrier family 25 (mitochondrial carrier; adenine nucleotide translocator), member 5 (SLC25A5), mRNA OS=Homo sapiens PE=2 SV=1 - [B2RCV1_HUMAN]	8.65181	13.42	6	4	32.8341	P61088	Ubiquitin-conjugating enzyme E2 N OS=Homo sapiens GN=UBE2N PE=1 SV=1 - [UBE2N_HUMAN]	15.0383	26.32	6	4	17.127	B0LM41	Protein RBM14-RBM4 OS=Homo sapiens GN=RBM14 PE=2 SV=1 - [B0LM41_HUMAN]	8.03623	9.44	1	2	37.0111	M0QXK2
Q9H9H4	Vacuolar protein sorting-associated protein 37B OS=Homo sapiens GN=VPS37B PE=1 SV=1 - [VP37B_HUMAN]	6.57768	9.82	1	2	31.2875	Q15046	Lysine--tRNA ligase OS=Homo sapiens GN=KARS PE=1 SV=3 - [SYK_HUMAN]	9.30619	8.04	4	4	68.0046	Q9BZX2-2	Isoform 2 of Uridine-cytidine kinase 2 OS=Homo sapiens GN=UCK2 - [UCK2_HUMAN]	4.69677	16.22	2	2	12.5796	B7Z4C2	cDNA FLJ56109, highly similar to Non-POU domain-containing octamer-binding protein OS=Homo sapiens PE=2 SV=1 - [B7Z4C2_HUMAN]	9.31537	5.24	4	2	43.8202	P15531	Nucleoside diphosphate kinase A OS=Homo sapiens GN=NME1 PE=1 SV=1 - [NDKA_HUMAN]	8.62118	34.87	6	4	17.1377	H3BND3	Cleavage and polyadenylation-specificity factor subunit 5 (Fragment) OS=Homo sapiens GN=NUDT21 PE=2 SV=1 - [H3BND3_HUMAN]	14.996	23.33	4	3	17.2161	P61006	Ras-related protein Rab-8A OS=Homo sapiens GN=RAB8A PE=1 SV=1 - [RAB8A_HUMAN]	8.01928	17.39	17	3	23.6532	Q7LBC6
P54920	Alpha-soluble NSF attachment protein OS=Homo sapiens GN=NAPA PE=1 SV=3 - [SNAA_HUMAN]	6.5049	8.47	1	2	33.2113	C9J830	Protein kinase, cAMP-dependent, regulatory, type II, alpha (Fragment) OS=Homo sapiens GN=PRKAR2A PE=4 SV=1 - [C9J830_HUMAN]	9.28882	24.56	4	2	12.6941	P18621	60S ribosomal protein L17 OS=Homo sapiens GN=RPL17 PE=1 SV=3 - [RL17_HUMAN]	4.64327	13.04	1	2	21.3833	B4DR63	Proteasome (prosome, macropain) 26S subunit, ATPase, 1 OS=Homo sapiens GN=PSMC1 PE=2 SV=1 - [B4DR63_HUMAN]	9.30059	14.17	4	4	41.1412	B2R6T7	Ribose-phosphate pyrophosphokinase OS=Homo sapiens PE=2 SV=1 - [B2R6T7_HUMAN]	8.59178	14.15	5	3	34.6679	Q96KK5	Histone H2A type 1-H OS=Homo sapiens GN=HIST1H2AH PE=1 SV=3 - [H2A1H_HUMAN]	14.9454	27.34	16	3	13.8978	P01023	Alpha-2-macroglobulin OS=Homo sapiens GN=A2M PE=1 SV=3 - [A2MG_HUMAN]	7.99959	2.24	1	3	163.188	A8KAP9
B4DNE4	Septin 7 OS=Homo sapiens GN=SEPT7 PE=2 SV=1 - [B4DNE4_HUMAN]	6.49084	7.59	12	3	44.6159	P15531	Nucleoside diphosphate kinase A OS=Homo sapiens GN=NME1 PE=1 SV=1 - [NDKA_HUMAN]	9.27466	33.55	8	4	17.1377	A8MU58	Aminoacyl tRNA synthetase complex-interacting multifunctional protein 2 OS=Homo sapiens GN=AIMP2 PE=4 SV=2 - [A8MU58_HUMAN]	4.62853	10.74	4	2	26.7429	A8K492	cDNA FLJ76789, highly similar to Homo sapiens methionine-tRNA synthetase (MARS), mRNA OS=Homo sapiens PE=2 SV=1 - [A8K492_HUMAN]	9.25315	4.67	2	3	101.08	B4DRU0	Eukaryotic translation initiation factor 3 subunit C OS=Homo sapiens GN=EIF3C PE=2 SV=1 - [B4DRU0_HUMAN]	8.5764	4.9	11	3	84.9132	Q6NVY0	Calcyclin binding protein OS=Homo sapiens GN=CACYBP PE=2 SV=1 - [Q6NVY0_HUMAN]	14.9288	19.3	4	5	26.1656	C9JIG9	Serine/threonine-protein kinase OSR1 OS=Homo sapiens GN=OXSR1 PE=2 SV=1 - [C9JIG9_HUMAN]	7.88152	7.48	2	3	51.8239	E9PKH2
A8K2Y2	cDNA FLJ78120, highly similar to Homo sapiens eukaryotic translation initiation factor 2, subunit 3 gamma, 52kDa (EIF2S3), mRNA OS=Homo sapiens PE=2 SV=1 - [A8K2Y2_HUMAN]	6.48627	6.78	4	2	51.0782	B3KT34	cDNA FLJ37560 fis, clone BRCOC2000333, highly similar to Succinate dehydrogenase (ubiquinone) flavoprotein subunit, mitochondrial (EC 1.3.5.1) OS=Homo sapiens PE=2 SV=1 - [B3KT34_HUMAN]	9.2707	9.34	13	3	48.1272	B4DT13	cDNA FLJ51542, highly similar to Ras-related protein Rab-11B OS=Homo sapiens PE=2 SV=1 - [B4DT13_HUMAN]	4.58718	12.26	9	2	17.6481	Q08499-5	Isoform 2 of cAMP-specific 3',5'-cyclic phosphodiesterase 4D OS=Homo sapiens GN=PDE4D - [PDE4D_HUMAN]	9.23403	8.09	11	3	57.7554	B4DWQ5	cDNA FLJ51655, highly similar to Actin-like protein 2 OS=Homo sapiens PE=2 SV=1 - [B4DWQ5_HUMAN]	8.55067	10.16	5	2	34.4859	B2R5V9	cDNA, FLJ92652, highly similar to Homo sapiens high density lipoprotein binding protein (vigilin)(HDLBP), mRNA OS=Homo sapiens PE=2 SV=1 - [B2R5V9_HUMAN]	14.9254	3.94	6	4	141.292	H0Y9V9	60S ribosomal protein L9 (Fragment) OS=Homo sapiens GN=RPL9 PE=4 SV=1 - [H0Y9V9_HUMAN]	7.83062	20.63	4	3	21.5557	A8K525
B4DWW1	ADP-ribosylation factor-like 1 OS=Homo sapiens GN=ARL1 PE=2 SV=1 - [B4DWW1_HUMAN]	6.45604	15.24	3	2	18.5536	E9PJD9	Ribosomal protein L27a OS=Homo sapiens GN=RPL27A PE=3 SV=1 - [E9PJD9_HUMAN]	9.26172	36.26	7	3	10.1206	O00625	Pirin OS=Homo sapiens GN=PIR PE=1 SV=1 - [PIR_HUMAN]	4.5795	7.59	1	2	32.0933	Q969X5-2	Isoform 2 of Endoplasmic reticulum-Golgi intermediate compartment protein 1 OS=Homo sapiens GN=ERGIC1 - [ERGI1_HUMAN]	9.22072	20.71	3	4	22.1462	E9M4D4	Hemoglobin alpha-1 globin chain (Fragment) OS=Homo sapiens GN=HBA1 PE=3 SV=1 - [E9M4D4_HUMAN]	8.54941	40	8	3	10.7765	P49207	60S ribosomal protein L34 OS=Homo sapiens GN=RPL34 PE=1 SV=3 - [RL34_HUMAN]	14.8827	28.21	1	4	13.2845	C9J0K6	Sorcin OS=Homo sapiens GN=SRI PE=2 SV=1 - [C9J0K6_HUMAN]	7.82145	18.06	3	3	17.5935	F8VRJ2
B2RDP6	cDNA, FLJ96709, highly similar to Homo sapiens glutamate rich WD repeat protein GRWD (GRWD), mRNA OS=Homo sapiens PE=2 SV=1 - [B2RDP6_HUMAN]	6.44971	6.73	4	2	49.3582	Q15126	Phosphomevalonate kinase OS=Homo sapiens GN=PMVK PE=1 SV=3 - [PMVK_HUMAN]	9.24706	21.88	1	4	21.9812	Q8IYB5-3	Isoform 3 of Stromal membrane-associated protein 1 OS=Homo sapiens GN=SMAP1 - [SMAP1_HUMAN]	4.56948	5.5	5	2	47.8311	B4DQX7	Zyxin OS=Homo sapiens GN=ZYX PE=2 SV=1 - [B4DQX7_HUMAN]	9.19922	9.16	8	3	45.046	P60866	40S ribosomal protein S20 OS=Homo sapiens GN=RPS20 PE=1 SV=1 - [RS20_HUMAN]	8.54402	28.57	2	3	13.3643	P53365	Arfaptin-2 OS=Homo sapiens GN=ARFIP2 PE=1 SV=1 - [ARFP2_HUMAN]	14.8635	13.2	4	4	37.8324	B4DMT5	Eukaryotic translation initiation factor 3 subunit F OS=Homo sapiens GN=EIF3F PE=2 SV=1 - [B4DMT5_HUMAN]	7.8023	14.33	4	3	33.219	Q5R370
Q13263-2	Isoform 2 of Transcription intermediary factor 1-beta OS=Homo sapiens GN=TRIM28 - [TIF1B_HUMAN]	6.43597	4.52	3	3	79.4235	C9J592	RAB7A, member RAS oncogene family (Fragment) OS=Homo sapiens GN=RAB7A PE=3 SV=1 - [C9J592_HUMAN]	9.22515	22.67	8	3	17.0267	P50402	Emerin OS=Homo sapiens GN=EMD PE=1 SV=1 - [EMD_HUMAN]	4.50763	9.84	1	2	28.9759	B4E205	cDNA FLJ61651, highly similar to Protein transport protein Sec24A OS=Homo sapiens PE=2 SV=1 - [B4E205_HUMAN]	9.17076	5.02	2	3	96.2115	B3KPH8	Lon protease homolog, mitochondrial OS=Homo sapiens PE=2 SV=1 - [B3KPH8_HUMAN]	8.52922	4.59	11	3	85.5016	A8K5M4	cDNA FLJ75088, highly similar to Homo sapiens p21 (CDKN1A)-activated kinase 2 (PAK2), mRNA OS=Homo sapiens PE=2 SV=1 - [A8K5M4_HUMAN]	14.8623	12.4	2	5	58.0069	B4DVI7	cDNA FLJ54176, highly similar to Signal recognition particle 68 kDa protein OS=Homo sapiens PE=2 SV=1 - [B4DVI7_HUMAN]	7.78609	7.03	7	3	60.1894	B1AHF3
Q96PU8-5	Isoform 3 of Protein quaking OS=Homo sapiens GN=QKI - [QKI_HUMAN]	6.42042	7.57	6	3	35.2103	B2R806	Eukaryotic translation initiation factor 3 subunit E OS=Homo sapiens PE=2 SV=1 - [B2R806_HUMAN]	9.21563	9.21	13	4	52.2234	B5BU61	Histone deacetylase OS=Homo sapiens GN=HDAC1 PE=2 SV=1 - [B5BU61_HUMAN]	4.46217	4.36	2	2	55.0407	B3KQT9	Protein disulfide isomerase family A, member 3 OS=Homo sapiens GN=PDIA3 PE=2 SV=1 - [B3KQT9_HUMAN]	9.16122	8.75	4	4	54.0685	P83881	60S ribosomal protein L36a OS=Homo sapiens GN=RPL36A PE=1 SV=2 - [RL36A_HUMAN]	8.52615	36.79	6	4	12.4328	B4E3R6	cDNA FLJ51777, highly similar to Squamous cell carcinoma antigen recognized byT-cells 3 OS=Homo sapiens PE=2 SV=1 - [B4E3R6_HUMAN]	14.8065	4.86	6	3	81.8799	Q2KQ72	Chromosome-associated protein E OS=Homo sapiens PE=2 SV=1 - [Q2KQ72_HUMAN]	7.7358	4.61	6	3	85.9251	B1P2N8
P00492	Hypoxanthine-guanine phosphoribosyltransferase OS=Homo sapiens GN=HPRT1 PE=1 SV=2 - [HPRT_HUMAN]	6.41258	11.47	2	2	24.5636	Q8IWR8	Ribosomal protein L19 (Fragment) OS=Homo sapiens PE=2 SV=1 - [Q8IWR8_HUMAN]	9.20245	19.65	3	3	20.8068	Q8IY67	Ribonucleoprotein PTB-binding 1 OS=Homo sapiens GN=RAVER1 PE=1 SV=1 - [RAVR1_HUMAN]	4.43639	3.3	3	2	63.8372	P62424	60S ribosomal protein L7a OS=Homo sapiens GN=RPL7A PE=1 SV=2 - [RL7A_HUMAN]	9.11561	14.29	1	3	29.977	P53618	Coatomer subunit beta OS=Homo sapiens GN=COPB1 PE=1 SV=3 - [COPB_HUMAN]	8.49892	5.14	4	4	107.074	Q09666	Neuroblast differentiation-associated protein AHNAK OS=Homo sapiens GN=AHNAK PE=1 SV=2 - [AHNK_HUMAN]	14.7939	5.48	4	6	628.699	B4DE36	Glucose-6-phosphate isomerase OS=Homo sapiens PE=2 SV=1 - [B4DE36_HUMAN]	7.71061	7.36	3	3	60.1477	J3QLI9
B4E0I8	Ribonucleoside-diphosphate reductase OS=Homo sapiens PE=2 SV=1 - [B4E0I8_HUMAN]	6.35607	5.47	11	3	79.1789	E7EN77	Non-SMC condensin I complex, subunit D2 (Fragment) OS=Homo sapiens GN=NCAPD2 PE=4 SV=2 - [E7EN77_HUMAN]	9.18449	3.92	9	3	102.584	B4DDD2	Uncharacterized protein OS=Homo sapiens GN=DHFR PE=2 SV=1 - [B4DDD2_HUMAN]	4.38928	17.04	2	2	15.6621	F8VXB1	Coatomer protein complex, subunit zeta 1 (Fragment) OS=Homo sapiens GN=COPZ1 PE=4 SV=1 - [F8VXB1_HUMAN]	9.10648	40.22	9	3	10.6214	B7ZW70	LOC727761 protein OS=Homo sapiens GN=LOC727761 PE=2 SV=1 - [B7ZW70_HUMAN]	8.4848	26.06	5	4	21.051	F5GYN4	Ubiquitin thioesterase OTUB1 OS=Homo sapiens GN=OTUB1 PE=2 SV=1 - [F5GYN4_HUMAN]	14.7396	14.94	7	3	28.033	P12236	ADP/ATP translocase 3 OS=Homo sapiens GN=SLC25A6 PE=1 SV=4 - [ADT3_HUMAN]	7.69174	10.07	3	3	32.8452	B7Z6K2
P61088	Ubiquitin-conjugating enzyme E2 N OS=Homo sapiens GN=UBE2N PE=1 SV=1 - [UBE2N_HUMAN]	6.31273	17.76	1	3	17.127	A8K4L9	Uncharacterized protein OS=Homo sapiens GN=TIAL1 PE=2 SV=1 - [A8K4L9_HUMAN]	9.16121	10.2	12	3	43.4211	C9J0K6	Sorcin OS=Homo sapiens GN=SRI PE=4 SV=1 - [C9J0K6_HUMAN]	4.37012	12.9	5	2	17.5935	A8K318	Protein kinase C substrate 80K-H OS=Homo sapiens GN=PRKCSH PE=2 SV=1 - [A8K318_HUMAN]	9.09812	6.67	4	3	59.1407	Q9UDY4	DnaJ homolog subfamily B member 4 OS=Homo sapiens GN=DNAJB4 PE=1 SV=1 - [DNJB4_HUMAN]	8.43728	17.21	3	4	37.7831	Q9H6T3	RNA polymerase II-associated protein 3 OS=Homo sapiens GN=RPAP3 PE=1 SV=2 - [RPAP3_HUMAN]	14.7322	7.07	1	3	75.6719	A8K590	cDNA FLJ77456, highly similar to Homo sapiens interleukin enhancer binding factor 3, 90kDa (ILF3), transcript variant 2, mRNA OS=Homo sapiens PE=2 SV=1 - [A8K590_HUMAN]	7.66111	4.56	6	2	76.0027	B2MV14
B4DW11	cDNA FLJ57622, highly similar to Clusterin OS=Homo sapiens PE=2 SV=1 - [B4DW11_HUMAN]	6.29277	15	7	2	25.6666	B4DQX7	Zyxin OS=Homo sapiens GN=ZYX PE=2 SV=1 - [B4DQX7_HUMAN]	9.13269	12.05	9	4	45.046	Q5STU3	DEAD (Asp-Glu-Ala-Asp) box polypeptide 39B OS=Homo sapiens GN=BAT1 PE=2 SV=2 - [Q5STU3_HUMAN]	4.36852	4.71	6	2	48.7938	Q8N9Z3	cDNA FLJ36025 fis, clone TESTI2016701, highly similar to TUMOR NECROSIS FACTOR TYPE 1 RECEPTOR ASSOCIATED PROTEIN OS=Homo sapiens PE=2 SV=1 - [Q8N9Z3_HUMAN]	9.07518	6.22	7	3	66.005	Q53GN4	WD repeat domain 1, isoform CRA_a (Fragment) OS=Homo sapiens GN=WDR1 PE=2 SV=1 - [Q53GN4_HUMAN]	8.38434	7.26	7	4	66.1379	B4DF70	cDNA FLJ60461, highly similar to Peroxiredoxin-2 (EC 1.11.1.15) OS=Homo sapiens PE=2 SV=1 - [B4DF70_HUMAN]	14.693	25.14	3	5	20.0946	Q9BSD7	Cancer-related nucleoside-triphosphatase OS=Homo sapiens GN=NTPCR PE=1 SV=1 - [NTPCR_HUMAN]	7.63956	23.16	2	3	20.7001	P54136
P98179	Putative RNA-binding protein 3 OS=Homo sapiens GN=RBM3 PE=1 SV=1 - [RBM3_HUMAN]	6.28694	21.02	1	2	17.16	B9ZVX0	Diaphanous homolog 1 (Drosophila) OS=Homo sapiens GN=DIAPH1 PE=4 SV=1 - [B9ZVX0_HUMAN]	9.13226	3.45	16	3	138.845	B4DKX4	cDNA FLJ58014, highly similar to Homo sapiens programmed cell death 4, transcript variant 1, mRNA OS=Homo sapiens PE=2 SV=1 - [B4DKX4_HUMAN]	4.33619	4.4	5	2	50.1974	B7Z2V6	ATPase, H+ transporting, lysosomal 70kDa, V1 subunit A OS=Homo sapiens GN=ATP6V1A PE=2 SV=1 - [B7Z2V6_HUMAN]	9.0372	11.68	3	3	37.7269	F5GZB1	Ras-related protein Rab-6A (Fragment) OS=Homo sapiens GN=RAB6A PE=2 SV=1 - [F5GZB1_HUMAN]	8.36733	23.94	15	3	16.1692	Q3MHD2	Protein LSM12 homolog OS=Homo sapiens GN=LSM12 PE=1 SV=2 - [LSM12_HUMAN]	14.6713	18.46	3	3	21.6871	F5H018	GTP-binding nuclear protein Ran (Fragment) OS=Homo sapiens GN=RAN PE=2 SV=1 - [F5H018_HUMAN]	7.63008	14.57	5	3	22.5207	Q6PKI6
B4DY66	Uncharacterized protein OS=Homo sapiens GN=SAE1 PE=2 SV=1 - [B4DY66_HUMAN]	6.26503	7.56	6	2	19.1398	B4DT13	cDNA FLJ51542, highly similar to Ras-related protein Rab-11B OS=Homo sapiens PE=2 SV=1 - [B4DT13_HUMAN]	9.08317	25.16	10	3	17.6481	B4DUR9	Uncharacterized protein OS=Homo sapiens GN=AHSA1 PE=2 SV=1 - [B4DUR9_HUMAN]	4.31961	8.68	2	2	32.3193	Q0QEN7	ATP synthase subunit beta (Fragment) OS=Homo sapiens GN=ATP5B PE=2 SV=1 - [Q0QEN7_HUMAN]	9.03171	12.58	3	4	48.083	H0Y586	Proteasome subunit alpha type-7 (Fragment) OS=Homo sapiens GN=PSMA7 PE=4 SV=1 - [H0Y586_HUMAN]	8.33801	15.51	3	2	21.2002	B4DR63	26S protease regulatory subunit 4 OS=Homo sapiens GN=PSMC1 PE=2 SV=1 - [B4DR63_HUMAN]	14.5205	9.54	4	3	41.1412	B4DRH6	cDNA FLJ54509, highly similar to Trifunctional enzyme subunit alpha, mitochondrial OS=Homo sapiens PE=2 SV=1 - [B4DRH6_HUMAN]	7.61668	5.72	5	3	78.2653	P61019
B4DQF1	cDNA FLJ55810, highly similar to Golgi reassembly-stacking protein 2 OS=Homo sapiens PE=2 SV=1 - [B4DQF1_HUMAN]	6.26414	9.03	6	2	31.7743	B4DVD7	cDNA FLJ56725, highly similar to Eukaryotic translation initiation factor 3 subunit 12 OS=Homo sapiens PE=2 SV=1 - [B4DVD7_HUMAN]	9.06464	14.22	4	2	24.4861	Q9H9A6	Leucine-rich repeat-containing protein 40 OS=Homo sapiens GN=LRRC40 PE=1 SV=1 - [LRC40_HUMAN]	4.31202	4.32	1	2	68.2071	Q06323	Proteasome activator complex subunit 1 OS=Homo sapiens GN=PSME1 PE=1 SV=1 - [PSME1_HUMAN]	8.97702	15.26	2	3	28.705	C9J0K6	Sorcin OS=Homo sapiens GN=SRI PE=2 SV=1 - [C9J0K6_HUMAN]	8.32915	21.29	3	3	17.5935	B4DTA2	cDNA FLJ60148, highly similar to Homo sapiens heterogeneous nuclear ribonucleoprotein D-like (HNRPDL), transcript variant 2, mRNA OS=Homo sapiens PE=2 SV=1 - [B4DTA2_HUMAN]	14.4904	15.5	3	4	30.1957	B4DT13	Ras-related protein Rab-11A OS=Homo sapiens GN=RAB11A PE=2 SV=1 - [B4DT13_HUMAN]	7.57039	23.87	13	3	17.6481	H7BY36
Q9Y5K5-2	Isoform 2 of Ubiquitin carboxyl-terminal hydrolase isozyme L5 OS=Homo sapiens GN=UCHL5 - [UCHL5_HUMAN]	6.26178	12.03	8	3	36.0562	A0N0E2	MHC class I antigen OS=Homo sapiens GN=HLA-A PE=3 SV=1 - [A0N0E2_HUMAN]	8.91216	9.86	208	3	41.0372	F5H282	T-complex protein 1 subunit alpha OS=Homo sapiens GN=TCP1 PE=3 SV=1 - [F5H282_HUMAN]	4.29719	6.02	3	2	36.4332	O00232	26S proteasome non-ATPase regulatory subunit 12 OS=Homo sapiens GN=PSMD12 PE=1 SV=3 - [PSD12_HUMAN]	8.96988	7.46	1	3	52.8706	Q6ZNZ8	cDNA FLJ26816 fis, clone PRS06437 OS=Homo sapiens PE=2 SV=1 - [Q6ZNZ8_HUMAN]	8.32776	7.09	2	3	54.4594	B4DMB1	cDNA FLJ53358, highly similar to Heterogeneous nuclear ribonucleoprotein R OS=Homo sapiens PE=2 SV=1 - [B4DMB1_HUMAN]	14.4342	8.24	9	5	66.9663	Q68E05	Putative uncharacterized protein DKFZp686A1765 OS=Homo sapiens GN=DKFZp686A1765 PE=2 SV=1 - [Q68E05_HUMAN]	7.56597	15.59	4	2	19.8891	P62424
Q8N1G4	Leucine-rich repeat-containing protein 47 OS=Homo sapiens GN=LRRC47 PE=1 SV=1 - [LRC47_HUMAN]	6.25626	4.46	1	2	63.4337	Q5J8M4	Migration-inducing gene 14 OS=Homo sapiens PE=2 SV=1 - [Q5J8M4_HUMAN]	8.90957	12.22	4	3	39.4532	O95205	Muscleblind-like 2 (Drosophila), isoform CRA_b OS=Homo sapiens GN=MBLL PE=2 SV=1 - [O95205_HUMAN]	4.24746	10.98	15	3	28.1222	E9PQR7	Vacuolar protein sorting 28 homolog (S. cerevisiae) (Fragment) OS=Homo sapiens GN=VPS28 PE=4 SV=1 - [E9PQR7_HUMAN]	8.96805	23.6	3	3	18.4574	Q06203	Amidophosphoribosyltransferase OS=Homo sapiens GN=PPAT PE=1 SV=1 - [PUR1_HUMAN]	8.32604	8.51	2	4	57.3624	P10644	cAMP-dependent protein kinase type I-alpha regulatory subunit OS=Homo sapiens GN=PRKAR1A PE=1 SV=1 - [KAP0_HUMAN]	14.4084	10.24	4	4	42.955	H3BTB3	ATP-dependent RNA helicase DDX19A OS=Homo sapiens GN=DDX19A PE=2 SV=1 - [H3BTB3_HUMAN]	7.55912	24.03	4	2	14.4704	A8KA17
B4DNN3	Uncharacterized protein OS=Homo sapiens GN=QARS PE=2 SV=1 - [B4DNN3_HUMAN]	6.2554	3.86	5	2	82.1931	Q13620-1	Isoform 2 of Cullin-4B OS=Homo sapiens GN=CUL4B - [CUL4B_HUMAN]	8.90921	5.03	4	4	102.235	P06703	Protein S100-A6 OS=Homo sapiens GN=S100A6 PE=1 SV=1 - [S10A6_HUMAN]	4.12497	16.67	1	2	10.1733	Q9UL25	Ras-related protein Rab-21 OS=Homo sapiens GN=RAB21 PE=1 SV=3 - [RAB21_HUMAN]	8.88255	12.44	1	2	24.3323	P22695	Cytochrome b-c1 complex subunit 2, mitochondrial OS=Homo sapiens GN=UQCRC2 PE=1 SV=3 - [QCR2_HUMAN]	8.28886	10.38	2	3	48.4129	B3KUH0	cDNA FLJ39883 fis, clone SPLEN2016268, highly similar to Protein CHMP7 OS=Homo sapiens PE=2 SV=1 - [B3KUH0_HUMAN]	14.3459	12.36	4	5	50.9073	Q9H3U1	Protein unc-45 homolog A OS=Homo sapiens GN=UNC45A PE=1 SV=1 - [UN45A_HUMAN]	7.54192	4.13	3	3	103.011	E9PB51
D6QS52	Calumenin isoform 8 OS=Homo sapiens GN=CALU PE=2 SV=1 - [D6QS52_HUMAN]	6.25397	12.44	12	2	23.4761	H0YD13	CD44 molecule (Indian blood group) (Fragment) OS=Homo sapiens GN=CD44 PE=4 SV=1 - [H0YD13_HUMAN]	8.89625	20.54	35	3	20.2154	O75886	Signal transducing adapter molecule 2 OS=Homo sapiens GN=STAM2 PE=1 SV=1 - [STAM2_HUMAN]	4.06226	4.38	1	2	58.1277	O95747	Serine/threonine-protein kinase OSR1 OS=Homo sapiens GN=OXSR1 PE=1 SV=1 - [OXSR1_HUMAN]	8.82758	6.07	1	3	57.9861	G3V198	Nuclear pore complex protein Nup160 OS=Homo sapiens GN=NUP160 PE=4 SV=1 - [G3V198_HUMAN]	8.28497	3.81	3	4	140.198	B4DTT7	cDNA FLJ53458, highly similar to SAPS domain family member 3 OS=Homo sapiens PE=2 SV=1 - [B4DTT7_HUMAN]	14.3217	8.53	10	4	60.4096	Q9H7E9	UPF0488 protein C8orf33 OS=Homo sapiens GN=C8orf33 PE=1 SV=1 - [CH033_HUMAN]	7.51022	16.16	1	3	24.9769	P26038
F8W1U7	ADP-ribosylation factor GTPase activating protein 1 (Fragment) OS=Homo sapiens GN=ARFGAP1 PE=4 SV=1 - [F8W1U7_HUMAN]	6.2476	12.18	10	3	29.5532	B3KTJ9	cDNA FLJ38393 fis, clone FEBRA2007212 OS=Homo sapiens PE=2 SV=1 - [B3KTJ9_HUMAN]	8.85901	4.44	10	3	102.866	D7PBN3	ESRP1/RAF1 fusion protein OS=Homo sapiens PE=2 SV=1 - [D7PBN3_HUMAN]	4.03941	2.73	6	2	118.541	Q86X55-1	Isoform 1 of Histone-arginine methyltransferase CARM1 OS=Homo sapiens GN=CARM1 - [CARM1_HUMAN]	8.79047	6.5	2	3	63.4192	B7Z254	Protein disulfide-isomerase A6 OS=Homo sapiens GN=PDIA6 PE=2 SV=1 - [B7Z254_HUMAN]	8.26245	9.84	6	3	47.8081	Q9H2M9	Rab3 GTPase-activating protein non-catalytic subunit OS=Homo sapiens GN=RAB3GAP2 PE=1 SV=1 - [RBGPR_HUMAN]	14.316	4.24	2	5	155.886	Q14432	cGMP-inhibited 3',5'-cyclic phosphodiesterase A OS=Homo sapiens GN=PDE3A PE=1 SV=3 - [PDE3A_HUMAN]	7.49561	3.16	1	3	124.901	E9PKD5
P78318	Immunoglobulin-binding protein 1 OS=Homo sapiens GN=IGBP1 PE=1 SV=1 - [IGBP1_HUMAN]	6.22057	7.96	1	2	39.1975	Q02413	Desmoglein-1 OS=Homo sapiens GN=DSG1 PE=1 SV=2 - [DSG1_HUMAN]	8.84512	3.62	1	3	113.676	B4DKK3	cDNA FLJ54791, highly similar to DnaJ homolog subfamily C member 7 OS=Homo sapiens PE=2 SV=1 - [B4DKK3_HUMAN]	3.93713	5.19	6	2	41.9909	H0YD13	CD44 molecule (Indian blood group) (Fragment) OS=Homo sapiens GN=CD44 PE=4 SV=1 - [H0YD13_HUMAN]	8.77829	20.54	23	3	20.2154	B4DRW6	Phosphorylase OS=Homo sapiens PE=2 SV=1 - [B4DRW6_HUMAN]	8.25345	5.17	6	4	95.8432	F5H442	Tumor susceptibility gene 101 protein OS=Homo sapiens GN=TSG101 PE=2 SV=1 - [F5H442_HUMAN]	14.2947	17.81	4	5	40.8917	B7Z1G4	cDNA FLJ61601, highly similar to Inosine-5'-monophosphate dehydrogenase 2 (EC 1.1.1.205) OS=Homo sapiens PE=2 SV=1 - [B7Z1G4_HUMAN]	7.49525	14.29	4	4	38.9832	Q8WVC2
Q10589	Bone marrow stromal antigen 2 OS=Homo sapiens GN=BST2 PE=1 SV=1 - [BST2_HUMAN]	6.1968	13.89	3	2	19.7563	P49755	Transmembrane emp24 domain-containing protein 10 OS=Homo sapiens GN=TMED10 PE=1 SV=2 - [TMEDA_HUMAN]	8.83631	14.61	5	3	24.96	B4DZI8	Coatomer protein complex, subunit beta 2 (Beta prime), isoform CRA_b OS=Homo sapiens GN=COPB2 PE=2 SV=1 - [B4DZI8_HUMAN]	3.9004	2.05	2	2	98.9836	B3KY04	cDNA FLJ46506 fis, clone THYMU3030752, highly similar to BTB/POZ domain-containing protein KCTD12 OS=Homo sapiens PE=2 SV=1 - [B3KY04_HUMAN]	8.77205	17.23	2	4	35.7087	Q9UI10	Translation initiation factor eIF-2B subunit delta OS=Homo sapiens GN=EIF2B4 PE=1 SV=2 - [EI2BD_HUMAN]	8.23182	7.27	7	3	57.5213	Q14C86	GTPase-activating protein and VPS9 domain-containing protein 1 OS=Homo sapiens GN=GAPVD1 PE=1 SV=2 - [GAPD1_HUMAN]	14.2448	3.86	9	5	164.877	P43490	Nicotinamide phosphoribosyltransferase OS=Homo sapiens GN=NAMPT PE=1 SV=1 - [NAMPT_HUMAN]	7.48842	7.74	2	3	55.4866	B3KTM6
B4DNK3	Uncharacterized protein OS=Homo sapiens GN=AIMP1 PE=2 SV=1 - [B4DNK3_HUMAN]	6.17553	12.27	3	2	29.7268	B7Z4K8	cDNA FLJ52869, highly similar to Homo sapiens basic leucine zipper and W2 domains 2 (BZW2), mRNA OS=Homo sapiens PE=2 SV=1 - [B7Z4K8_HUMAN]	8.83011	11.45	15	4	45.2795	Q8IWR0	Zinc finger CCCH domain-containing protein 7A OS=Homo sapiens GN=ZC3H7A PE=1 SV=1 - [Z3H7A_HUMAN]	3.89534	1.54	1	2	110.466	H0YJ34	Fermitin family member 2 (Fragment) OS=Homo sapiens GN=FERMT2 PE=4 SV=1 - [H0YJ34_HUMAN]	8.74773	5.47	4	3	73.3064	P62266	40S ribosomal protein S23 OS=Homo sapiens GN=RPS23 PE=1 SV=3 - [RS23_HUMAN]	8.21052	23.78	2	3	15.7977	F8VWH9	ADP-ribosylation factor GTPase-activating protein 1 OS=Homo sapiens GN=ARFGAP1 PE=2 SV=1 - [F8VWH9_HUMAN]	14.2121	19.12	10	5	37.0865	G3V198	Nuclear pore complex protein Nup160 OS=Homo sapiens GN=NUP160 PE=4 SV=1 - [G3V198_HUMAN]	7.40276	3.24	3	3	140.198	Q9BWW5
P01834	Ig kappa chain C region OS=Homo sapiens GN=IGKC PE=1 SV=1 - [IGKC_HUMAN]	6.16844	31.13	9	2	11.6017	O15357-2	Isoform 2 of Phosphatidylinositol-3,4,5-trisphosphate 5-phosphatase 2 OS=Homo sapiens GN=INPPL1 - [SHIP2_HUMAN]	8.82884	4.82	4	3	113.106	P45974-2	Isoform Short of Ubiquitin carboxyl-terminal hydrolase 5 OS=Homo sapiens GN=USP5 - [UBP5_HUMAN]	3.83633	2.75	2	2	93.2484	Q12906-5	Isoform 5 of Interleukin enhancer-binding factor 3 OS=Homo sapiens GN=ILF3 - [ILF3_HUMAN]	8.74417	7.68	12	5	74.5603	B4DT13	Ras-related protein Rab-11A OS=Homo sapiens GN=RAB11A PE=2 SV=1 - [B4DT13_HUMAN]	8.20956	29.68	13	4	17.6481	Q7Z417	Nuclear fragile X mental retardation-interacting protein 2 OS=Homo sapiens GN=NUFIP2 PE=1 SV=1 - [NUFP2_HUMAN]	14.1775	8.92	1	5	76.0747	Q96TA1	Niban-like protein 1 OS=Homo sapiens GN=FAM129B PE=1 SV=3 - [NIBL1_HUMAN]	7.38234	6.17	2	4	84.0847	B7Z8K4
A8K3Q9	cDNA FLJ76611, highly similar to Homo sapiens ribosomal protein L14 (RPL14), mRNA OS=Homo sapiens PE=2 SV=1 - [A8K3Q9_HUMAN]	6.1534	12.04	1	2	23.44	B5BU72	Phosphatidylinositol-binding clathrin assembly protein isoform 2 OS=Homo sapiens GN=PICALM PE=2 SV=1 - [B5BU72_HUMAN]	8.82865	8.2	27	4	66.3518	E5RHG8	Transcription elongation factor B (SIII), polypeptide 1 (15kDa, elongin C) (Fragment) OS=Homo sapiens GN=TCEB1 PE=4 SV=1 - [E5RHG8_HUMAN]	3.80065	29.21	3	2	9.95372	Q5M7Z9	TARS protein (Fragment) OS=Homo sapiens GN=TARS PE=2 SV=1 - [Q5M7Z9_HUMAN]	8.73209	8.36	9	5	78.5554	B3KU91	cDNA FLJ39381 fis, clone PERIC2000422, highly similar to HEAT repeat-containing protein 2 OS=Homo sapiens PE=2 SV=1 - [B3KU91_HUMAN]	8.20652	6.49	6	3	66.4796	O75340	Programmed cell death protein 6 OS=Homo sapiens GN=PDCD6 PE=1 SV=1 - [PDCD6_HUMAN]	14.1746	21.47	3	4	21.8548	B2R4M6	cDNA, FLJ92148, highly similar to Homo sapiens S100 calcium binding protein A9 (calgranulin B) (S100A9), mRNA OS=Homo sapiens PE=2 SV=1 - [B2R4M6_HUMAN]	7.37945	26.32	2	2	13.2015	P53396
Q15654	Thyroid receptor-interacting protein 6 OS=Homo sapiens GN=TRIP6 PE=1 SV=3 - [TRIP6_HUMAN]	6.13234	9.03	3	3	50.2555	A8K4Z2	cDNA FLJ77120, highly similar to Homo sapiens replication factor C (activator 1) 5, 36.5kDa (RFC5), transcript variant 2, mRNA OS=Homo sapiens PE=2 SV=1 - [A8K4Z2_HUMAN]	8.81656	15.29	9	3	28.7681	B5ME26	Uncharacterized protein OS=Homo sapiens GN=AKR1C2 PE=4 SV=1 - [B5ME26_HUMAN]	3.78547	13.64	3	3	24.9429	D3DN77	HCG2022736, isoform CRA_a OS=Homo sapiens GN=hCG_2022736 PE=4 SV=1 - [D3DN77_HUMAN]	8.71498	22.76	6	7	30.749	B3KX51	cDNA FLJ44754 fis, clone BRACE3030748, highly similar to Guanine nucleotide-binding protein G(i), alpha-2 subunit OS=Homo sapiens PE=2 SV=1 - [B3KX51_HUMAN]	8.19623	13.2	8	3	34.8852	P53396	ATP-citrate synthase OS=Homo sapiens GN=ACLY PE=1 SV=3 - [ACLY_HUMAN]	14.1611	7.72	4	6	120.762	B4DM97	cDNA FLJ55002, highly similar to Alpha-centractin OS=Homo sapiens PE=2 SV=1 - [B4DM97_HUMAN]	7.32055	11.68	8	3	38.2507	P17858
F8WFB9	SH3-domain GRB2-like endophilin B2 OS=Homo sapiens GN=SH3GLB2 PE=4 SV=1 - [F8WFB9_HUMAN]	6.13161	31.5	6	4	14.4723	B2REB8	SET nuclear oncogene OS=Homo sapiens GN=SET PE=3 SV=1 - [B2REB8_HUMAN]	8.80901	13.96	6	3	30.9742	P19105	Myosin regulatory light chain 12A OS=Homo sapiens GN=MYL12A PE=1 SV=2 - [ML12A_HUMAN]	3.71876	17.54	3	3	19.7815	F5H1E1	Coatomer protein complex, subunit epsilon OS=Homo sapiens GN=COPE PE=4 SV=1 - [F5H1E1_HUMAN]	8.68228	11.07	5	3	34.4884	P19623	Spermidine synthase OS=Homo sapiens GN=SRM PE=1 SV=1 - [SPEE_HUMAN]	8.1761	11.26	1	3	33.8027	B4DUR9	Activator of 90 kDa heat shock protein ATPase homolog 1 OS=Homo sapiens GN=AHSA1 PE=2 SV=1 - [B4DUR9_HUMAN]	14.1347	17.01	5	4	32.3193	Q14257	Reticulocalbin-2 OS=Homo sapiens GN=RCN2 PE=1 SV=1 - [RCN2_HUMAN]	7.2836	9.78	2	2	36.8536	B4DUR9
Q5SX88	GDP dissociation inhibitor 2 OS=Homo sapiens GN=GDI2 PE=2 SV=1 - [Q5SX88_HUMAN]	6.09364	6.5	4	2	45.5902	P26599	Polypyrimidine tract-binding protein 1 OS=Homo sapiens GN=PTBP1 PE=1 SV=1 - [PTBP1_HUMAN]	8.79058	8.66	24	4	57.1856	Q96BG6	ACTN4 protein (Fragment) OS=Homo sapiens GN=ACTN4 PE=2 SV=2 - [Q96BG6_HUMAN]	3.7039	3.47	8	2	73.5738	Q71UM5	40S ribosomal protein S27-like OS=Homo sapiens GN=RPS27L PE=1 SV=3 - [RS27L_HUMAN]	8.68091	39.29	2	4	9.47087	P25398	40S ribosomal protein S12 OS=Homo sapiens GN=RPS12 PE=1 SV=3 - [RS12_HUMAN]	8.1535	24.24	1	3	14.5055	Q16513	Serine/threonine-protein kinase N2 OS=Homo sapiens GN=PKN2 PE=1 SV=1 - [PKN2_HUMAN]	14.1224	5.18	2	4	111.964	Q6UWP8	Suprabasin OS=Homo sapiens GN=SBSN PE=2 SV=2 - [SBSN_HUMAN]	7.25704	15.25	1	2	60.5046	P62081
Q01650	Large neutral amino acids transporter small subunit 1 OS=Homo sapiens GN=SLC7A5 PE=1 SV=2 - [LAT1_HUMAN]	6.05248	6.71	1	2	54.9743	Q96IJ6	Mannose-1-phosphate guanyltransferase alpha OS=Homo sapiens GN=GMPPA PE=1 SV=1 - [GMPPA_HUMAN]	8.76444	9.76	2	3	46.2621	P26447	Protein S100-A4 OS=Homo sapiens GN=S100A4 PE=1 SV=1 - [S10A4_HUMAN]	3.699	18.81	1	2	11.7207	P50395	Rab GDP dissociation inhibitor beta OS=Homo sapiens GN=GDI2 PE=1 SV=2 - [GDIB_HUMAN]	8.66796	9.66	3	4	50.6309	E9PMD7	Serine/threonine-protein phosphatase (Fragment) OS=Homo sapiens GN=PPP1CA PE=2 SV=1 - [E9PMD7_HUMAN]	8.14617	14.62	8	3	28.8793	P62333	26S protease regulatory subunit 10B OS=Homo sapiens GN=PSMC6 PE=1 SV=1 - [PRS10_HUMAN]	14.1186	14.4	4	5	44.1451	A8K4T6	cDNA FLJ76282, highly similar to Homo sapiens proteasome (prosome, macropain) 26S subunit, non-ATPase, 5 (PSMD5), mRNA OS=Homo sapiens PE=2 SV=1 - [A8K4T6_HUMAN]	7.24979	9.52	2	4	56.1884	Q16186
F5H5Y2	Signal sequence receptor, alpha OS=Homo sapiens GN=SSR1 PE=4 SV=1 - [F5H5Y2_HUMAN]	6.05237	8.88	8	2	29.4021	B7Z1R5	ATPase, H+ transporting, lysosomal 70kDa, V1 subunit A OS=Homo sapiens GN=ATP6V1A PE=2 SV=1 - [B7Z1R5_HUMAN]	8.73305	7.53	3	3	64.6948	B4DYU7	cDNA FLJ56520, highly similar to CG1 protein OS=Homo sapiens PE=2 SV=1 - [B4DYU7_HUMAN]	3.64243	4.33	4	2	68.8891	O43681	ATPase ASNA1 OS=Homo sapiens GN=ASNA1 PE=1 SV=2 - [ASNA_HUMAN]	8.62125	11.78	1	3	38.7674	Q9BZX2	Uridine-cytidine kinase 2 OS=Homo sapiens GN=UCK2 PE=1 SV=1 - [UCK2_HUMAN]	8.12756	17.24	2	4	29.2811	E5RI99	60S ribosomal protein L30 (Fragment) OS=Homo sapiens GN=RPL30 PE=2 SV=1 - [E5RI99_HUMAN]	14.0868	31.58	3	3	12.6476	O60884	DnaJ homolog subfamily A member 2 OS=Homo sapiens GN=DNAJA2 PE=1 SV=1 - [DNJA2_HUMAN]	7.2042	9.22	2	4	45.7166	H0YC35
P60866	40S ribosomal protein S20 OS=Homo sapiens GN=RPS20 PE=1 SV=1 - [RS20_HUMAN]	6.01832	22.69	2	2	13.3643	B7Z9W6	cDNA, FLJ78980, highly similar to DnaJ homolog subfamily C member 7 OS=Homo sapiens PE=2 SV=1 - [B7Z9W6_HUMAN]	8.69906	11.19	6	5	50.0348	F8WE65	Peptidyl-prolyl cis-trans isomerase OS=Homo sapiens GN=PPIA PE=3 SV=1 - [F8WE65_HUMAN]	3.39162	20	6	2	13.0133	B2R5H0	cDNA, FLJ92471, highly similar to Homo sapiens S100 calcium binding protein A11 (calgizzarin) (S100A11), mRNA OS=Homo sapiens PE=4 SV=1 - [B2R5H0_HUMAN]	8.60601	23.81	2	2	11.7168	Q05BX4	PSMD1 protein (Fragment) OS=Homo sapiens GN=PSMD1 PE=2 SV=1 - [Q05BX4_HUMAN]	8.11477	4	4	3	90.9632	B4DLA6	cDNA FLJ54365, highly similar to DNA replication licensing factor MCM4 OS=Homo sapiens PE=2 SV=1 - [B4DLA6_HUMAN]	14.0837	8.26	6	6	92.664	F5GZB1	Ras-related protein Rab-6A (Fragment) OS=Homo sapiens GN=RAB6A PE=2 SV=1 - [F5GZB1_HUMAN]	7.2028	23.94	15	3	16.1692	B4DS24
P16615-2	Isoform 2 of Sarcoplasmic/endoplasmic reticulum calcium ATPase 2 OS=Homo sapiens GN=ATP2A2 - [AT2A2_HUMAN]	6.00884	2.51	5	2	109.62	P62316	Small nuclear ribonucleoprotein Sm D2 OS=Homo sapiens GN=SNRPD2 PE=1 SV=1 - [SMD2_HUMAN]	8.66197	24.58	1	3	13.5182	Q68E00	Putative uncharacterized protein DKFZp686G2045 (Fragment) OS=Homo sapiens GN=DKFZp686G2045 PE=2 SV=2 - [Q68E00_HUMAN]	3.18416	6.98	3	2	32.5593	B5BU01	Eukaryotic translation initiation factor 2 beta OS=Homo sapiens GN=EIF2S2 PE=2 SV=1 - [B5BU01_HUMAN]	8.54902	11.11	2	3	38.3064	P21796	Voltage-dependent anion-selective channel protein 1 OS=Homo sapiens GN=VDAC1 PE=1 SV=2 - [VDAC1_HUMAN]	8.10679	12.01	4	3	30.7536	B7Z475	cDNA FLJ55712, highly similar to F-box-like/WD repeat protein TBL1XR1 OS=Homo sapiens PE=2 SV=1 - [B7Z475_HUMAN]	13.9692	13.83	7	4	40.7308	Q9BR63	FARSB protein (Fragment) OS=Homo sapiens GN=FARSB PE=2 SV=2 - [Q9BR63_HUMAN]	7.1487	5.64	6	3	65.6594	K7EJ78
B4DKK3	cDNA FLJ54791, highly similar to DnaJ homolog subfamily C member 7 OS=Homo sapiens PE=2 SV=1 - [B4DKK3_HUMAN]	6.00523	6.28	6	2	41.9909	E9PKZ0	Ribosomal protein L8 OS=Homo sapiens GN=RPL8 PE=4 SV=1 - [E9PKZ0_HUMAN]	8.63996	16.59	8	3	22.3752	P39019	40S ribosomal protein S19 OS=Homo sapiens GN=RPS19 PE=1 SV=2 - [RS19_HUMAN]	3.03252	16.55	2	2	16.0505	B4DNN2	DnaJ (Hsp40) homolog, subfamily B, member 4, isoform CRA_b OS=Homo sapiens GN=DNAJB4 PE=2 SV=1 - [B4DNN2_HUMAN]	8.54626	19.82	3	3	24.9398	Q0QEN7	ATP synthase subunit beta (Fragment) OS=Homo sapiens GN=ATP5B PE=2 SV=1 - [Q0QEN7_HUMAN]	8.07576	13.48	5	4	48.083	P14314	Glucosidase 2 subunit beta OS=Homo sapiens GN=PRKCSH PE=1 SV=2 - [GLU2B_HUMAN]	13.9241	8.71	4	4	59.3878	Q1JQ76	Ribosomal protein (Fragment) OS=Homo sapiens GN=RPL10A PE=2 SV=1 - [Q1JQ76_HUMAN]	7.08655	25.73	2	5	23.5209	E9PBS1
P16152	Carbonyl reductase [NADPH] 1 OS=Homo sapiens GN=CBR1 PE=1 SV=3 - [CBR1_HUMAN]	5.97327	11.19	1	2	30.3559	B4DR63	Proteasome (prosome, macropain) 26S subunit, ATPase, 1 OS=Homo sapiens GN=PSMC1 PE=2 SV=1 - [B4DR63_HUMAN]	8.63143	14.17	5	4	41.1412	A9UFC0	Caspase 14 OS=Homo sapiens GN=CASP14 PE=2 SV=1 - [A9UFC0_HUMAN]	3.02144	11.98	2	2	27.6489	B3KNZ4	cDNA FLJ30804 fis, clone FEBRA2001267, highly similar to Eukaryotic translation initiation factor 3 subunit 8 OS=Homo sapiens PE=2 SV=1 - [B3KNZ4_HUMAN]	8.54033	7.15	16	4	80.8724	Q9BTW9	Tubulin-specific chaperone D OS=Homo sapiens GN=TBCD PE=1 SV=2 - [TBCD_HUMAN]	8.06397	3.27	2	3	132.515	K7EJ78	40S ribosomal protein S15 (Fragment) OS=Homo sapiens GN=RPS15 PE=3 SV=1 - [K7EJ78_HUMAN]	13.911	10.08	5	2	14.7288	H0Y586	Proteasome subunit alpha type-7 (Fragment) OS=Homo sapiens GN=PSMA7 PE=4 SV=1 - [H0Y586_HUMAN]	7.07536	15.51	3	2	21.2002	P62304
Q5T092	RER1 retention in endoplasmic reticulum 1 homolog (S. cerevisiae) (Fragment) OS=Homo sapiens GN=RER1 PE=2 SV=1 - [Q5T092_HUMAN]	5.95588	18.35	4	2	18.3764	P38919	Eukaryotic initiation factor 4A-III OS=Homo sapiens GN=EIF4A3 PE=1 SV=4 - [IF4A3_HUMAN]	8.60759	10.95	5	4	46.8412	B4DL61	cDNA FLJ60291 OS=Homo sapiens PE=2 SV=1 - [B4DL61_HUMAN]	2.99895	6.48	4	2	39.8883	B4DT13	cDNA FLJ51542, highly similar to Ras-related protein Rab-11B OS=Homo sapiens PE=2 SV=1 - [B4DT13_HUMAN]	8.51934	21.94	9	3	17.6481	B7Z3X4	Glucosamine-6-phosphate isomerase 1 OS=Homo sapiens GN=GNPDA1 PE=2 SV=1 - [B7Z3X4_HUMAN]	8.02423	22.17	10	3	24.0315	K7ER90	Eukaryotic translation initiation factor 3 subunit G (Fragment) OS=Homo sapiens GN=EIF3G PE=3 SV=1 - [K7ER90_HUMAN]	13.8321	15.86	5	3	25.4258	P48507	Glutamate--cysteine ligase regulatory subunit OS=Homo sapiens GN=GCLM PE=1 SV=1 - [GSH0_HUMAN]	7.07011	10.22	1	2	30.7078	B2R8A2
A8MTG3	Zinc finger protein 207 OS=Homo sapiens GN=ZNF207 PE=4 SV=1 - [A8MTG3_HUMAN]	5.91523	5.82	6	2	47.7177	Q92615	La-related protein 4B OS=Homo sapiens GN=LARP4B PE=1 SV=3 - [LAR4B_HUMAN]	8.60471	7.32	5	4	80.5026	Q05CK9	Isoform 5 of Heterogeneous nuclear ribonucleoprotein Q OS=Homo sapiens GN=SYNCRIP - [HNRPQ_HUMAN]	2.94172	7.32	9	2	46.2992	P38159-2	Isoform 2 of RNA-binding motif protein, X chromosome OS=Homo sapiens GN=RBMX - [RBMX_HUMAN]	8.51108	9.52	2	3	40.8216	H0Y9V9	60S ribosomal protein L9 (Fragment) OS=Homo sapiens GN=RPL9 PE=4 SV=1 - [H0Y9V9_HUMAN]	7.97688	13.23	5	3	21.5557	Q9BSV4	SFPQ protein (Fragment) OS=Homo sapiens GN=SFPQ PE=2 SV=2 - [Q9BSV4_HUMAN]	13.7725	6.62	4	4	68.5879	Q9Y5K5	Ubiquitin carboxyl-terminal hydrolase isozyme L5 OS=Homo sapiens GN=UCHL5 PE=1 SV=3 - [UCHL5_HUMAN]	7.03653	13.98	9	4	37.583	K7EIN1
E2QC29	Eukaryotic translation initiation factor 3, subunit E interacting protein (Fragment) OS=Homo sapiens GN=EIF3EIP PE=4 SV=1 - [E2QC29_HUMAN]	5.87004	16.67	7	2	17.7488	E7ER27	Hydroxysteroid (17-beta) dehydrogenase 4 OS=Homo sapiens GN=HSD17B4 PE=3 SV=3 - [E7ER27_HUMAN]	8.60091	7.6	16	3	53.8945	F8VY02	Endoplasmic reticulum protein 29 OS=Homo sapiens GN=ERP29 PE=4 SV=1 - [F8VY02_HUMAN]	2.87341	18.75	2	2	18.1044	Q9Y295	Developmentally-regulated GTP-binding protein 1 OS=Homo sapiens GN=DRG1 PE=1 SV=1 - [DRG1_HUMAN]	8.5054	13.35	1	4	40.5168	Q05DV5	ZC3HAV1 protein (Fragment) OS=Homo sapiens GN=ZC3HAV1 PE=2 SV=1 - [Q05DV5_HUMAN]	7.9645	7.38	3	2	49.2222	B4E1W1	Transcription factor 12 OS=Homo sapiens GN=TCF12 PE=2 SV=1 - [B4E1W1_HUMAN]	13.7604	6.95	7	2	48.1279	P51571	Translocon-associated protein subunit delta OS=Homo sapiens GN=SSR4 PE=1 SV=1 - [SSRD_HUMAN]	7.00146	19.08	1	3	18.9866	O95758
P05109	Protein S100-A8 OS=Homo sapiens GN=S100A8 PE=1 SV=1 - [S10A8_HUMAN]	5.86555	38.71	1	4	10.8276	P61026	Ras-related protein Rab-10 OS=Homo sapiens GN=RAB10 PE=1 SV=1 - [RAB10_HUMAN]	8.59566	16.5	68	3	22.5266	Q96SR7	cDNA FLJ14683 fis, clone NT2RP2004768, weakly similar to SERINE/THREONINE-PROTEIN KINASE NRK1 (EC 2.7.1.-) OS=Homo sapiens PE=2 SV=1 - [Q96SR7_HUMAN]	2.71857	9.52	9	2	25.887	Q86UE4	Protein LYRIC OS=Homo sapiens GN=MTDH PE=1 SV=2 - [LYRIC_HUMAN]	8.50378	6.87	1	3	63.7988	Q5J8M4	Migration-inducing gene 14 OS=Homo sapiens PE=2 SV=1 - [Q5J8M4_HUMAN]	7.94569	11.36	4	3	39.4532	B4DS79	cDNA FLJ56828, highly similar to Adapter-relatedprotein complex 1 beta-1 subunit OS=Homo sapiens PE=2 SV=1 - [B4DS79_HUMAN]	13.7442	14.43	4	6	53.8176	P10599	Thioredoxin OS=Homo sapiens GN=TXN PE=1 SV=3 - [THIO_HUMAN]	6.98987	28.57	1	3	11.7297	Q15428
C9JFK9	BCL2-associated athanogene 3 (Fragment) OS=Homo sapiens GN=BAG3 PE=4 SV=1 - [C9JFK9_HUMAN]	5.8635	8.92	3	2	34.7385	B4DT28	Heterogeneous nuclear ribonucleoprotein R, isoform CRA_a OS=Homo sapiens GN=HNRPR PE=2 SV=1 - [B4DT28_HUMAN]	8.51204	8.1	11	4	55.6837	B3KM80	Nucleolin, isoform CRA_c OS=Homo sapiens GN=NCL PE=2 SV=1 - [B3KM80_HUMAN]	2.68418	3.73	5	2	58.5193	A8MTG3	Zinc finger protein 207 OS=Homo sapiens GN=ZNF207 PE=4 SV=1 - [A8MTG3_HUMAN]	8.49776	9.4	6	3	47.7177	M0QYM8	SUMO-activating enzyme subunit 1 (Fragment) OS=Homo sapiens GN=SAE1 PE=4 SV=1 - [M0QYM8_HUMAN]	7.93795	18.05	6	3	14.8893	B4DEK4	Sorting nexin-2 OS=Homo sapiens GN=SNX2 PE=2 SV=1 - [B4DEK4_HUMAN]	13.7192	11.69	6	4	46.0687	B2RDY9	Adenylyl cyclase-associated protein OS=Homo sapiens PE=2 SV=1 - [B2RDY9_HUMAN]	6.9736	11.16	16	4	51.5826	F8VV32
Q96BG6	ACTN4 protein (Fragment) OS=Homo sapiens GN=ACTN4 PE=2 SV=2 - [Q96BG6_HUMAN]	5.80428	4.57	3	2	73.5738	B4DHR1	cDNA FLJ53009, highly similar to Calreticulin OS=Homo sapiens PE=2 SV=1 - [B4DHR1_HUMAN]	8.48561	18.87	4	3	24.2718	F8WFB9	SH3-domain GRB2-like endophilin B2 OS=Homo sapiens GN=SH3GLB2 PE=4 SV=1 - [F8WFB9_HUMAN]	2.50529	16.54	6	2	14.4723	Q53G42	mRNA decapping enzyme variant (Fragment) OS=Homo sapiens PE=2 SV=1 - [Q53G42_HUMAN]	8.495	10.09	2	2	38.586	H0Y4Y4	EF-hand domain-containing protein D2 (Fragment) OS=Homo sapiens GN=EFHD2 PE=4 SV=1 - [H0Y4Y4_HUMAN]	7.91938	21.79	2	3	19.5718	D6RF44	Heterogeneous nuclear ribonucleoprotein D0 (Fragment) OS=Homo sapiens GN=HNRNPD PE=2 SV=1 - [D6RF44_HUMAN]	13.7168	28.57	8	3	12.6325	B5LY67	Uridine monophosphate synthetase isoform E OS=Homo sapiens GN=UMPS PE=2 SV=1 - [B5LY67_HUMAN]	6.96558	7.89	5	2	37.6301	B4DSA8
B4DTV0	cDNA FLJ57801, highly similar to Homo sapiens AHNAK nucleoprotein (desmoyokin) (AHNAK), transcript variant 1, mRNA (Fragment) OS=Homo sapiens PE=2 SV=1 - [B4DTV0_HUMAN]	5.69433	3.89	2	2	114.065	B4DP50	cDNA FLJ58269, highly similar to Bifunctional aminoacyl-tRNA synthetase OS=Homo sapiens PE=2 SV=1 - [B4DP50_HUMAN]	8.47357	8.19	2	3	54.1083	Q9Y5K5-2	Isoform 2 of Ubiquitin carboxyl-terminal hydrolase isozyme L5 OS=Homo sapiens GN=UCHL5 - [UCHL5_HUMAN]	2.48922	9.49	8	2	36.0562	Q66K25	SAMD4B protein OS=Homo sapiens GN=SAMD4B PE=2 SV=1 - [Q66K25_HUMAN]	8.48881	3.92	2	2	72.4559	H0YDD4	Dihydrolipoyllysine-residue acetyltransferase component of pyruvate dehydrogenase complex, mitochondrial (Fragment) OS=Homo sapiens GN=DLAT PE=2 SV=1 - [H0YDD4_HUMAN]	7.82238	8.35	7	3	51.1691	E5RGA2	Eukaryotic translation initiation factor 3 subunit E OS=Homo sapiens GN=EIF3E PE=2 SV=1 - [E5RGA2_HUMAN]	13.7146	12.5	8	5	41.3307	Q05CK9	SYNCRIP protein (Fragment) OS=Homo sapiens GN=SYNCRIP PE=2 SV=1 - [Q05CK9_HUMAN]	6.94472	13.47	6	5	50.6189	B4DDV4
B7Z333	RAB18, member RAS oncogene family OS=Homo sapiens GN=RAB18 PE=2 SV=1 - [B7Z333_HUMAN]	5.69256	18.31	6	2	15.4979	B4DKL5	cDNA FLJ51983, highly similar to Phosphoglycerate mutase 1 (EC 5.4.2.1) OS=Homo sapiens PE=2 SV=1 - [B4DKL5_HUMAN]	8.46876	15.48	14	3	27.0799	B4DSL3	cDNA FLJ59412 OS=Homo sapiens PE=2 SV=1 - [B4DSL3_HUMAN]	2.41748	2.87	6	2	76.4852	Q5U0B3	Proteasome (Prosome, macropain) 26S subunit, non-ATPase, 8 OS=Homo sapiens PE=2 SV=1 - [Q5U0B3_HUMAN]	8.48505	14.79	2	4	29.9026	P19105	Myosin regulatory light chain 12A OS=Homo sapiens GN=MYL12A PE=1 SV=2 - [ML12A_HUMAN]	7.80278	16.96	8	3	19.7815	O43633	Charged multivesicular body protein 2a OS=Homo sapiens GN=CHMP2A PE=1 SV=1 - [CHM2A_HUMAN]	13.581	14.86	3	4	25.0879	B7Z3Q4	cDNA FLJ51873, highly similar to Alkyldihydroxyacetonephosphate synthase, peroxisomal (EC 2.5.1.26) OS=Homo sapiens PE=2 SV=1 - [B7Z3Q4_HUMAN]	6.93298	5.11	2	2	63.8061	I3L4X3
E9PQR7	Vacuolar protein sorting 28 homolog (S. cerevisiae) (Fragment) OS=Homo sapiens GN=VPS28 PE=4 SV=1 - [E9PQR7_HUMAN]	5.67487	14.91	3	2	18.4574	B4DUX0	Uncharacterized protein OS=Homo sapiens GN=ACOT7 PE=2 SV=1 - [B4DUX0_HUMAN]	8.45513	11.7	8	2	29.6261	Q3B7W7	TMED7 protein (Fragment) OS=Homo sapiens GN=TMED7 PE=2 SV=1 - [Q3B7W7_HUMAN]	2.34625	17.16	5	2	15.1946	Q9BSV4	SFPQ protein (Fragment) OS=Homo sapiens GN=SFPQ PE=2 SV=2 - [Q9BSV4_HUMAN]	8.48126	6.15	3	3	68.5879	P13674	Prolyl 4-hydroxylase subunit alpha-1 OS=Homo sapiens GN=P4HA1 PE=1 SV=2 - [P4HA1_HUMAN]	7.7846	7.3	2	3	61.011	E7ETU5	RNA-binding motif, single-stranded-interacting protein 1 OS=Homo sapiens GN=RBMS1 PE=4 SV=1 - [E7ETU5_HUMAN]	13.4992	10.81	5	3	40.1216	Q9BWW4	Single-stranded DNA-binding protein 3 OS=Homo sapiens GN=SSBP3 PE=1 SV=1 - [SSBP3_HUMAN]	6.90013	6.96	1	2	40.3949	A8KAQ5
Q9Y3B4	Pre-mRNA branch site protein p14 OS=Homo sapiens GN=SF3B14 PE=1 SV=1 - [PM14_HUMAN]	5.63095	18.4	1	2	14.5756	Q6KB66-2	Isoform 2 of Keratin, type II cytoskeletal 80 OS=Homo sapiens GN=KRT80 - [K2C80_HUMAN]	8.41943	5.92	5	2	47.212	B7Z462	cDNA FLJ58016, highly similar to Polypeptide N-acetylgalactosaminyltransferase2 (EC 2.4.1.41) OS=Homo sapiens PE=2 SV=1 - [B7Z462_HUMAN]	2.16117	5.56	5	2	40.7514	D3YTB1	Ribosomal protein L32 (Fragment) OS=Homo sapiens GN=RPL32 PE=4 SV=1 - [D3YTB1_HUMAN]	8.44653	27.82	3	3	15.6067	D6R9I9	ATP-binding cassette sub-family E member 1 OS=Homo sapiens GN=ABCE1 PE=2 SV=1 - [D6R9I9_HUMAN]	7.77596	8.79	2	3	47.0064	M0R0Y2	Alpha-soluble NSF attachment protein OS=Homo sapiens GN=NAPA PE=4 SV=1 - [M0R0Y2_HUMAN]	13.418	19.53	4	4	29.1443	A6PVX3	26S proteasome non-ATPase regulatory subunit 4 (Fragment) OS=Homo sapiens GN=PSMD4 PE=2 SV=1 - [A6PVX3_HUMAN]	6.84459	15.76	3	2	21.7694	M0R0Y2
C9JU56	Ribosomal protein L31 (Fragment) OS=Homo sapiens GN=RPL31 PE=4 SV=1 - [C9JU56_HUMAN]	5.62541	20	7	2	13.3274	P26373	60S ribosomal protein L13 OS=Homo sapiens GN=RPL13 PE=1 SV=4 - [RL13_HUMAN]	8.41641	15.17	5	3	24.2465	P62316	Small nuclear ribonucleoprotein Sm D2 OS=Homo sapiens GN=SNRPD2 PE=1 SV=1 - [SMD2_HUMAN]	1.96231	14.41	1	2	13.5182	B7Z3S4	cDNA FLJ51981, highly similar to Histone deacetylase 1 OS=Homo sapiens PE=2 SV=1 - [B7Z3S4_HUMAN]	8.42361	13.79	8	2	19.7348	B7Z6K2	cDNA FLJ58625, highly similar to Polypeptide N-acetylgalactosaminyltransferase 2 (EC 2.4.1.41) OS=Homo sapiens PE=2 SV=1 - [B7Z6K2_HUMAN]	7.77199	6.94	4	3	60.7874	Q9Y3U8	60S ribosomal protein L36 OS=Homo sapiens GN=RPL36 PE=1 SV=3 - [RL36_HUMAN]	13.4006	28.57	2	3	12.2459	B2RBV7	cDNA, FLJ95721, highly similar to Homo sapiens cullin 4A (CUL4A), mRNA OS=Homo sapiens PE=2 SV=1 - [B2RBV7_HUMAN]	6.82011	7.89	3	5	76.7557	F5GYN4
Q5T171	Pygopus homolog 2 (Drosophila) OS=Homo sapiens GN=PYGO2 PE=2 SV=1 - [Q5T171_HUMAN]	5.61056	9.21	2	2	37.7491	H0Y7C0	USO1 vesicle docking protein homolog (yeast) (Fragment) OS=Homo sapiens GN=USO1 PE=4 SV=1 - [H0Y7C0_HUMAN]	8.40271	6.9	6	4	71.7165	A8K092	ATP synthase subunit alpha OS=Homo sapiens GN=ATP5A1 PE=2 SV=1 - [A8K092_HUMAN]	1.92392	4.77	3	2	54.4597	B4DZP4	Uncharacterized protein OS=Homo sapiens GN=DYNC1LI2 PE=2 SV=1 - [B4DZP4_HUMAN]	8.42153	8.19	2	2	44.9768	B2RDI5	cDNA, FLJ96627, highly similar to Homo sapiens calpain 1, (mu/I) large subunit (CAPN1), mRNA OS=Homo sapiens PE=2 SV=1 - [B2RDI5_HUMAN]	7.75638	6.16	4	5	81.8451	B4DZP4	Cytoplasmic dynein 1 light intermediate chain 2 OS=Homo sapiens GN=DYNC1LI2 PE=2 SV=1 - [B4DZP4_HUMAN]	13.3718	13.73	3	4	44.9768	B4DFP5	cDNA FLJ57484, highly similar to Hepatocyte growth factor-regulated tyrosine kinase substrate OS=Homo sapiens PE=2 SV=1 - [B4DFP5_HUMAN]	6.79252	15.38	4	3	25.4458	B4DJ21
E7ER27	Hydroxysteroid (17-beta) dehydrogenase 4 OS=Homo sapiens GN=HSD17B4 PE=3 SV=3 - [E7ER27_HUMAN]	5.60402	5.2	4	2	53.8945	B7Z254	Protein disulfide isomerase family A, member 6 OS=Homo sapiens GN=PDIA6 PE=2 SV=1 - [B7Z254_HUMAN]	8.40176	9.15	7	3	47.8081	B7Z9C4	Uncharacterized protein OS=Homo sapiens GN=CTPS PE=2 SV=1 - [B7Z9C4_HUMAN]	1.82124	6.37	3	2	35.2312	P05109	Protein S100-A8 OS=Homo sapiens GN=S100A8 PE=1 SV=1 - [S10A8_HUMAN]	8.39705	23.66	1	2	10.8276	A8K590	cDNA FLJ77456, highly similar to Homo sapiens interleukin enhancer binding factor 3, 90kDa (ILF3), transcript variant 2, mRNA OS=Homo sapiens PE=2 SV=1 - [A8K590_HUMAN]	7.75306	4.56	6	2	76.0027	B7Z254	Protein disulfide-isomerase A6 OS=Homo sapiens GN=PDIA6 PE=2 SV=1 - [B7Z254_HUMAN]	13.2237	10.53	6	3	47.8081	B4DSL3	cDNA FLJ59412 OS=Homo sapiens PE=2 SV=1 - [B4DSL3_HUMAN]	6.78842	3.59	9	2	76.4852	P04083
E5RJR5	S-phase kinase-associated protein 1 OS=Homo sapiens GN=SKP1 PE=4 SV=1 - [E5RJR5_HUMAN]	5.60318	12.27	2	2	18.7083	B4DFA2	N-ethylmaleimide-sensitive factor OS=Homo sapiens GN=NSF PE=2 SV=1 - [B4DFA2_HUMAN]	8.33624	6.68	10	4	71.5386	P50897-2	Isoform 2 of Palmitoyl-protein thioesterase 1 OS=Homo sapiens GN=PPT1 - [PPT1_HUMAN]	1.81188	13.79	3	2	23.0787	Q07960	Rho GTPase-activating protein 1 OS=Homo sapiens GN=ARHGAP1 PE=1 SV=1 - [RHG01_HUMAN]	8.37463	9.34	1	3	50.4042	Q15046	Lysine--tRNA ligase OS=Homo sapiens GN=KARS PE=1 SV=3 - [SYK_HUMAN]	7.73404	7.71	2	5	68.0046	P60866	40S ribosomal protein S20 OS=Homo sapiens GN=RPS20 PE=1 SV=1 - [RS20_HUMAN]	13.2042	25.21	2	3	13.3643	K4DI93	Cullin 4B, isoform CRA_e OS=Homo sapiens GN=CUL4B PE=3 SV=1 - [K4DI93_HUMAN]	6.78833	5.78	3	5	102.691	Q6IPN0
Q9HBB9	HC56 OS=Homo sapiens PE=2 SV=1 - [Q9HBB9_HUMAN]	5.58735	2.48	4	2	118.678	B7Z4C2	cDNA FLJ56109, highly similar to Non-POU domain-containing octamer-binding protein OS=Homo sapiens PE=2 SV=1 - [B7Z4C2_HUMAN]	8.32032	5.24	6	2	43.8202	A4D2A2	MCM7 minichromosome maintenance deficient 7 (S. cerevisiae) OS=Homo sapiens GN=MCM7 PE=2 SV=1 - [A4D2A2_HUMAN]	0	5.34	8	2	60.6048	P12273	Prolactin-inducible protein OS=Homo sapiens GN=PIP PE=1 SV=1 - [PIP_HUMAN]	8.37036	26.03	1	3	16.5618	B2R4M6	cDNA, FLJ92148, highly similar to Homo sapiens S100 calcium binding protein A9 (calgranulin B) (S100A9), mRNA OS=Homo sapiens PE=2 SV=1 - [B2R4M6_HUMAN]	7.72493	26.32	2	2	13.2015	Q13347	Eukaryotic translation initiation factor 3 subunit I OS=Homo sapiens GN=EIF3I PE=1 SV=1 - [EIF3I_HUMAN]	13.1754	17.23	2	5	36.4786	Q59EW3	RAB18, member RAS oncogene family variant (Fragment) OS=Homo sapiens PE=2 SV=1 - [Q59EW3_HUMAN]	6.70242	23.62	4	2	14.3981	F5GX77
A8K492	cDNA FLJ76789, highly similar to Homo sapiens methionine-tRNA synthetase (MARS), mRNA OS=Homo sapiens PE=2 SV=1 - [A8K492_HUMAN]	5.57789	4.33	2	3	101.08	P16615-2	Isoform 2 of Sarcoplasmic/endoplasmic reticulum calcium ATPase 2 OS=Homo sapiens GN=ATP2A2 - [AT2A2_HUMAN]	8.30199	3.51	12	3	109.62								C9JPM4	ADP-ribosylation factor 4 (Fragment) OS=Homo sapiens GN=ARF4 PE=3 SV=1 - [C9JPM4_HUMAN]	8.35553	22.83	2	3	14.5438	F8VZY9	Keratin, type I cytoskeletal 18 OS=Homo sapiens GN=KRT18 PE=2 SV=1 - [F8VZY9_HUMAN]	7.70532	11.25	4	5	43.7474	Q08188	Protein-glutamine gamma-glutamyltransferase E OS=Homo sapiens GN=TGM3 PE=1 SV=4 - [TGM3_HUMAN]	13.1502	9.24	2	6	76.5836	B7Z4K8	cDNA FLJ52869, highly similar to Homo sapiens basic leucine zipper and W2 domains 2 (BZW2), mRNA OS=Homo sapiens PE=2 SV=1 - [B7Z4K8_HUMAN]	6.69232	9.41	7	3	45.2795	K7ER90
B4DHR1	cDNA FLJ53009, highly similar to Calreticulin OS=Homo sapiens PE=2 SV=1 - [B4DHR1_HUMAN]	5.55979	11.79	3	2	24.2718	B3KM80	Nucleolin, isoform CRA_c OS=Homo sapiens GN=NCL PE=2 SV=1 - [B3KM80_HUMAN]	8.30127	6.16	6	3	58.5193								O75821	Eukaryotic translation initiation factor 3 subunit G OS=Homo sapiens GN=EIF3G PE=1 SV=2 - [EIF3G_HUMAN]	8.35443	14.06	2	3	35.5889	Q1JQ76	Ribosomal protein (Fragment) OS=Homo sapiens GN=RPL10A PE=2 SV=1 - [Q1JQ76_HUMAN]	7.69852	16.99	2	3	23.5209	O00232	26S proteasome non-ATPase regulatory subunit 12 OS=Homo sapiens GN=PSMD12 PE=1 SV=3 - [PSD12_HUMAN]	13.1381	9.43	1	4	52.8706	Q13501	Sequestosome-1 OS=Homo sapiens GN=SQSTM1 PE=1 SV=1 - [SQSTM_HUMAN]	6.66274	6.36	1	2	47.6569	Q5QPM0
P04150-9	Isoform Beta-B of Glucocorticoid receptor OS=Homo sapiens GN=NR3C1 - [GCR_HUMAN]	5.54608	3.91	9	3	78.6451	B4DQ49	Keratin 78 OS=Homo sapiens GN=KRT78 PE=2 SV=1 - [B4DQ49_HUMAN]	8.27393	10.31	3	3	31.4177								E9PKZ0	Ribosomal protein L8 OS=Homo sapiens GN=RPL8 PE=4 SV=1 - [E9PKZ0_HUMAN]	8.34051	17.07	3	3	22.3752	B4DL61	cDNA FLJ60291 OS=Homo sapiens PE=2 SV=1 - [B4DL61_HUMAN]	7.59612	8.17	4	2	39.8883	P50454	Serpin H1 OS=Homo sapiens GN=SERPINH1 PE=1 SV=2 - [SERPH_HUMAN]	13.121	15.79	14	5	46.4112	P13010	X-ray repair cross-complementing protein 5 OS=Homo sapiens GN=XRCC5 PE=1 SV=3 - [XRCC5_HUMAN]	6.64551	5.87	2	4	82.6523	P61081
Q04637-6	Isoform E of Eukaryotic translation initiation factor 4 gamma 1 OS=Homo sapiens GN=EIF4G1 - [IF4G1_HUMAN]	5.52457	2.07	16	2	154.709	Q15758	Neutral amino acid transporter B(0) OS=Homo sapiens GN=SLC1A5 PE=1 SV=2 - [AAAT_HUMAN]	8.22476	6.1	3	3	56.5623								Q96J85	C-Mpl binding protein OS=Homo sapiens GN=LARP4 PE=2 SV=1 - [Q96J85_HUMAN]	8.33694	7.73	6	2	42.4777	E5RJP4	Glutamine--fructose-6-phosphate aminotransferase [isomerizing] 2 (Fragment) OS=Homo sapiens GN=GFPT2 PE=2 SV=1 - [E5RJP4_HUMAN]	7.57707	14.35	5	2	24.3988	G3V4F7	Signal recognition particle 54 kDa protein OS=Homo sapiens GN=SRP54 PE=2 SV=1 - [G3V4F7_HUMAN]	13.114	7.05	3	3	48.6385	H0YD13	CD44 antigen (Fragment) OS=Homo sapiens GN=CD44 PE=2 SV=1 - [H0YD13_HUMAN]	6.62439	17.84	12	3	20.2154	A8K8U1
P62861	40S ribosomal protein S30 OS=Homo sapiens GN=FAU PE=1 SV=1 - [RS30_HUMAN]	5.51173	18.64	2	2	6.64382	C9JU56	Ribosomal protein L31 (Fragment) OS=Homo sapiens GN=RPL31 PE=4 SV=1 - [C9JU56_HUMAN]	8.22192	20	9	2	13.3274								Q8NBU8	TMED7-TICAM2 readthrough OS=Homo sapiens GN=TMED7-TICAM2 PE=2 SV=1 - [Q8NBU8_HUMAN]	8.31953	18.09	3	3	21.2194	Q7RTQ9	Kinesin light chain 1A OS=Homo sapiens GN=KNS2 PE=2 SV=1 - [Q7RTQ9_HUMAN]	7.56984	8.36	21	3	61.164	Q8WX92	Negative elongation factor B OS=Homo sapiens GN=NELFB PE=1 SV=1 - [NELFB_HUMAN]	13.1111	6.55	1	3	65.6554	A8KAQ5	cDNA FLJ77404, highly similar to Homo sapiens small nuclear ribonucleoprotein 70kDa polypeptide (RNP antigen) (SNRP70), transcript variant 1, mRNA OS=Homo sapiens PE=2 SV=1 - [A8KAQ5_HUMAN]	6.58387	7.78	2	3	51.4649	P21796
Q08554-2	Isoform 1B of Desmocollin-1 OS=Homo sapiens GN=DSC1 - [DSC1_HUMAN]	5.44015	3.1	2	2	93.776	B4DWW1	ADP-ribosylation factor-like 1 OS=Homo sapiens GN=ARL1 PE=2 SV=1 - [B4DWW1_HUMAN]	8.21823	20.73	7	3	18.5536								P23284	Peptidyl-prolyl cis-trans isomerase B OS=Homo sapiens GN=PPIB PE=1 SV=2 - [PPIB_HUMAN]	8.29292	18.98	1	4	23.7275	A4D2P2	Ras-related C3 botulinum toxin substrate 1 (Rho family, small GTP binding protein Rac1) OS=Homo sapiens GN=RAC1 PE=3 SV=1 - [A4D2P2_HUMAN]	7.54458	19.59	3	3	16.786	B4DJ66	Proteasome (Prosome, macropain) 26S subunit, non-ATPase, 13, isoform CRA_d OS=Homo sapiens GN=PSMD13 PE=2 SV=1 - [B4DJ66_HUMAN]	13.0932	19.29	9	6	35.3244	E5RI99	60S ribosomal protein L30 (Fragment) OS=Homo sapiens GN=RPL30 PE=2 SV=1 - [E5RI99_HUMAN]	6.57751	24.56	2	2	12.6476	H0YJS4
D3DUP2	WNK lysine deficient protein kinase 1, isoform CRA_d OS=Homo sapiens GN=WNK1 PE=4 SV=1 - [D3DUP2_HUMAN]	5.42889	1.28	8	2	222.567	Q6IPN0	RTN4 protein OS=Homo sapiens GN=RTN4 PE=2 SV=1 - [Q6IPN0_HUMAN]	8.2042	11.37	14	3	36.8953								P07195	L-lactate dehydrogenase B chain OS=Homo sapiens GN=LDHB PE=1 SV=2 - [LDHB_HUMAN]	8.29046	10.48	1	3	36.6151	Q9Y295	Developmentally-regulated GTP-binding protein 1 OS=Homo sapiens GN=DRG1 PE=1 SV=1 - [DRG1_HUMAN]	7.51674	8.99	1	3	40.5168	B4DRU9	cDNA FLJ57179, highly similar to Homo sapiens ATP-binding cassette, sub-family F (GCN20), member 3 (ABCF3), mRNA OS=Homo sapiens PE=2 SV=1 - [B4DRU9_HUMAN]	12.9556	7.19	2	4	75.5271	Q06203	Amidophosphoribosyltransferase OS=Homo sapiens GN=PPAT PE=1 SV=1 - [PUR1_HUMAN]	6.57201	7.93	2	3	57.3624	P16435
B4DUD5	Uncharacterized protein OS=Homo sapiens GN=CSTF2 PE=2 SV=1 - [B4DUD5_HUMAN]	5.38899	3.25	5	2	58.5804	O94979-7	Isoform 7 of Protein transport protein Sec31A OS=Homo sapiens GN=SEC31A - [SC31A_HUMAN]	8.20044	2.79	16	2	105.686								E5RI99	Ribosomal protein L30 (Fragment) OS=Homo sapiens GN=RPL30 PE=3 SV=1 - [E5RI99_HUMAN]	8.26341	31.58	2	3	12.6476	E9PF10	Nuclear pore complex protein Nup155 OS=Homo sapiens GN=NUP155 PE=2 SV=1 - [E9PF10_HUMAN]	7.46734	2.79	3	3	148	Q6KB66	Keratin, type II cytoskeletal 80 OS=Homo sapiens GN=KRT80 PE=1 SV=2 - [K2C80_HUMAN]	12.8678	10.62	1	4	50.4938	Q8WVC2	40S ribosomal protein S21 OS=Homo sapiens GN=RPS21 PE=3 SV=1 - [Q8WVC2_HUMAN]	6.55142	33.33	3	3	8.84446	B4DV85
[truncated: 364 more rows]
[truncated: 6 more columns]

## Sheet: >10% Max Score GO
SL3a #1							SL3a #2							SL3abc #1							SL3abc #2							SL123#1							SL123#2							D3#1							D3#2
[truncated: 611 more rows]
[truncated: 6 more columns]

## Sheet: Overlap
SL3a											SL3a bc											SL123											D3
[truncated: 272 more rows]

## Sheet: Proteins absent in ctrl RNA
SL3a											SL3abc											SL123											D3
[truncated: 215 more rows]
